# Supplementary material
Source: publisher figshare collection journal article supplement (https://gsajournals.figshare.com/articles/dataset/_/19059725)
Supplement: Supplementary file 1 [file 2]

# Supplementary Results

## CONTENTS

## Page

|                                                                                             |          |
|---------------------------------------------------------------------------------------------|----------|
| <b><i>Yippee</i><sup>s1</sup> cDNA sequences</b>                                            | <b>1</b> |
| <b>Figure S6. Identified isoforms of <i>Yippee</i> from adult <i>s</i><sup>1</sup> cDNA</b> | <b>5</b> |
| <b>Figure S7. Loss of <i>Yippee</i> function affects bristle numbers</b>                    | <b>6</b> |

### ***Yippee*<sup>s1</sup> cDNA sequences**

*Yippee*<sup>s1</sup> cDNAs were amplified using RT-PCR, then, products were cloned and sequenced as described in Materials and Methods in the main text. Alignment of cDNAs to *s*<sup>1</sup> genomic DNA are shown in Figure 6 (cDNA from pupae) and in Figure S6 (cDNA from adults) and annotated in the genomic sequence of the *s*<sup>1</sup> insertion deposited at Genbank (accession OM135585). We chose to separate the data into two figures for clarity of presentation because different primer sets were used for the two experiments (pupa and adults). The obtained *s*<sup>1</sup> *Yippee* cDNA sequences are:

#### >Pupa-type1

```
GCGCAGAATGCAGTGACAACCCTAGGAAGCATTCCACAGTGTTTTGTTGTTTTTTTGTGC
AAGCGACGCATTAACCGTGTTCTATAAATTATATAAGTTCCAATAGGTCCAGAGTTATG
TTATTTCCAACCCCAAAGCTCAAGGAAAATCCCCTGACACCGGACACCTGACCAGGATTC
CCCAAGTGGAGTCATCTTCAAACAGCTGTGAAAAAGGAACAAAGGAGGAGCACAACAAA
CACACGCATACACACGTACGTACTCGGGAGAGCGAGCGAGACGGGGTGCGACCAGAAGA
GCGAGTGAGGTAGAGGAGGGAGCACAATGGGACGCATTTTCTTGGAACATCTTGGGGGT
CTGAAACTCTTCAATTGCGCCCAATGCCACACGAACCTGACCAACCGCAGTCAATTGATC
AGTACCCGATTCACAGGCGCAACAGGACGCGCCTATCTGTTTAAGCGTGTGGTCAACCTG
ACCTTCAGCAACATCCAGGAACGGGTCTATGCTCACGGGTCGCCACATGGTGCGCGACGTT
ATGTGCAAGAATTGTGGAGCCAACTTGGCTGGATGTACGAGTTCGCCACCGAAGAGTC
ACAAAAATACAAGGAGGGTCGCGTTATCCTGGAGTACGCCCTGATCACAGAGGCAGAGG
GCTTTCCGTCGGAGGCCGCCACCACGAGTCATTGAGCCGATTGAATATACAGCCGAAAA
CGGGAACCACGCATTGGCGAACCTTGTGTAGCCCTAAGTATTGAGTAGATGGCCACAGGC
GATGGCCTCTATGCATTAGACCTAGATTAGAGATCGCCGTAGTCGGCTCCGGTGTTCCGGG
ATACCGAAGACCGATATATCGGTTGCACATCCGCCACGGAG
```

#### >Pupa-type2

```
GCGCAGAATGCAGTGACAACCCTAGGAAGCATTCCACAGTGTTTTGTTGTTTTTTTGTGC
AAGCGACGCATTAACCGTGTTCTATAAATTATATAAGTTCCAATAGGTCCAGAGTTATG
```

TTATTTCCAGTAGGTCTAGAGATCTTCCTTCTTTTCGCTGAGACCCCAAAGCTCAAGGAAA  
ATCCCCTGACACCGGACACCTGACCAGGATTCCCCAAGTGGAGTCATCTTCAAACAGCTG  
TGAAAAAGGAACAAAGGAGGAGCACAACAAACACACGCATACACACGTACGTACTCGGG  
AGAGCGAGCGAGACGGGGTGGACCAGAAGAGCGAGTGAGGTAGAGGAGGGAGCACAAT  
GGGACGCATTTTCTTGGAACATCTTGGGGGTCTGAAACTCTTCAATTGCGCCCAATGCCA  
CACGAACCTGACCAACCGCAGTCAATTGATCAGTACCCGATTACAGGGCGCAACAGGACG  
CGCCTATCTGTTTAAGCGTGTGGTCAACCTGACCTTCAGCAACATCCAGGAACGGGTCAT  
GCTCACGGGTCGCCACATGGTGCGCGACGTTATGTGCAAGAATTGTGGAGCCAACTTGG  
CTGGATGTACGAGTTCGCCACCGAAGAGTCACAAAAATACAAGGAGGGTCGCGTTATCCT  
GGAGTACGCCCTGATCACAGAGGCAGAGGGCTTCCGTCGGAGGCCGCCACCACGAGTCA  
TTGAGCCGATTGAATATACAGCCGAAAACGGGAACCACGCATTGGCGAACCTTGTGTA  
GCCCTAAGTATTGAGTAGATGGCCACAGGCGATGGCCTCTATGCATTAGACCTAGATTAG  
AGATCGCCGTAGTCGGCTCCGGTGTTCTGGGATACCGAAGACCGATATATCGGTTGCACAT  
CCGCCACGGAG

>Pupa-type3

CAGAATGCAGTGACAACCCTAGGAAGCATTCCACAGTGTTTTGTTGTTTTTTTGTGCAAG  
CGACGCATTAACCGTGTTCTATAAATTATATAAGTTCCAATAGACCCCAAAGCTCAAGGA  
AAATCCCCTGACACCGGACACCTGACCAGGATTCCCCAAGTGGAGTCATCTTCAAACAGC  
TGTGAAAAAGGAACAAAGGAGGAGCACAACAAACACACGCATACACACGTACGTACTCG  
GGAGAGCGAGCGAGACGGGGTGGACCAGAAGAGCGAGTGAGGTAGAGGAGGGAGCACA  
ATGGGACGCATTTTCTTGGAACATCTTGGGGGTCTGAAACTCTTCAATTGCGCCCAATGC  
CACACGAACCTGACCAACCGCAGTCAATTGATCAGTACCCGATTACAGGGCGCAACAGGA  
CGCGCCTATCTGTTTAAGCGTGTGGTCAACCTGACCTTCAGCAACATCCAGGAACGGGTC  
ATGCTCACGGGTCGCCACATGGTGCGCGACGTTATGTGCAAGAATTGTGGAGCCAACTT  
GGCTGGATGTACGAGTTCGCCACCGAAGAGTCACAAAAATACAAGGAGGGTCGCGTTAT  
CCTGGAGTACGCCCTGATCACAGAGGCAGAGGGCTTCCGTCGGAGGCCGCCACCACGAG  
TCATTGAGCCGATTGAATATACAGCCGAAAACGGGAACCACGCATTGGCGAACCTTGTG  
TAGCCCTAAGTATTGAGTAGATGGCCACAGGCGATGGCCTCTATGCATTAGACCTAGATT  
AGAGATCGCCGTAGTCGGCTCCGGTGTTCTGGGATACCGAAGACCGATATATCGGTTGCAC  
ATCCGCCACGGAG

>Pupa-type4

AGCATTCCACAGTGTTTTGTTGTTTTTTTGTGCAAGCGACGCATTAACCGTGTTCTATAA  
ATTATATAAGTTCCAATAGGTCCAGAGTTATGTTATTTCCAACCCCAAAGCTCAAGGAA  
AATCCCCTGACACCGGACACCTGACCAGGATTCCCCAAGTGGAGTCATCTTCAAACAGCT  
GTGAAAAAGATAAGGAGTATTACAAGGCCAGGTAGTAATCGAAACTACCCGTATTATAA  
CCCGCATTTGATAGGAACAAAGGAGGAGCACAACAAACACACGCATACACACGTACGTAC  
TCGGGAGAGCGAGCGAGACGGGGTGGACCAGAAGAGCGAGTGAGGTAGAGGAGGGAGC  
ACAATGGGACGCATTTTCTTGGAACATCTTGGGGGTCTGAAACTCTTCAATTGCGCCCAA  
TGCCACACGAACCTGACCAACCGCAGTCAATTGATCAGTACTCGATTACAGGGCGCAACA  
GGACGCGCCTATCTGTTTAAGCGTGTGGTCAACCTGACCTTCAGCAACATCCAGGAACGG  
GTCATGCTCACGGGTCGCCACATGGTGCGCGACGTTATGTGCAAGAATTGTGGAGCCAAA  
CTTGGCTGGATGTACGAGTTCGCCACCGAAGAGTCACAAAAATACAAGGAGGGTCGCGT  
TATCCTGGAGTACGCCCTGATCACAGAGGCAGAGGGCTTCCGTCGGAGGCCGCCACCAC

GAGTCATTGAGCCGATTGAATATACAGCCGGAACGGAACACGCATTGGCGAACCT  
TGTGTAGCCCTAAGTATTGAGTAGAT

>Pupa-type5

GCGCAGAATGCAGTGACAACCCTAGGAAGCATTCCACAGTGTTTTGTTGTTTTTTGTGC  
AAGCGACGCATTAACCGTGTTCTATAAATTATATAAGTTCCAATAGGTCCAGAGTTATG  
TTATTTCCACTATCCTCGCTTTCGTATTCGACCTTAACCTTTCTGTAGTTATGTGCCCAA  
CTCATTGGTTGTTGGTTGGCACACCACAAATATACTGTTGCCGAGCACAATTGATCGGCT  
AAATGGTATGGCAAGAAAAGACCCCAAAGCTCAAGGAAAATCCCCTGACACCGGACACCT  
GACCAGGATTCCCCAAGTGGAGTCATCTTCAAACAGCTGTGAAAAAGGAACAAAGGAGG  
AGCACAACAAACACACGCATACACACGTACGTACTCGGGAGAGCGAGCGAGACGGGGTGC  
GACCAGAAGAGCGAGTGAGGTAGAGGAGGGAGCACAATGGGACGCATTTTCTTGGAACA  
TCTTGGGGGTCTGAAACTCTTCAATTGCGCCCAATGCCACACGAACCTGACCAACCGCAG  
TCAATTGATCAGTACCCGATTCACAGGCGCAACAGGACGCGCCTATCTGTTTAAGCGTGT  
GGTCAACCTGACCTTCAGCAACATCCAGGAACGGGTCTATGCTCACGGGTCGCCACATGGT  
GCGCGACGTTATGTGCAAGAATTGTGGAGCCAACTTGGCTGGATGTACGAGTTCGCCAC  
CGAAGAGTCACAAAAATACAAGGAGGGTTCGCGTTATCCTGGAGTACGCCCTGATCACAG  
AGGCAGAGGGCTTTCCGTCGGAGGCCGCCACCACGAGTCATTGAGCCGATTGAATATACA  
GCCGAAAACGGGAACCACGCATTGGCGAACCTTGTGTAGCCCTAAGTATTGAGTAGAT  
GGCCACAGGCGATGGCCTCTATGCATTAGACCTAGATTAGAGATCGCCGTAGTCGGCTCC  
GGTGTTCCGGGATACCGAAGACCGATATATCGGTTGCACATCCGCCACGGAG

>Adult-type1

GGTCAGGTTTCGTGTGGCATTGGGCGCAATTGAAGAGTTTCAGACCCCCAAGATGTTCCAA  
GAAAATGCGTCCCATTGTGCTCCCTCCTCTACCTCACTCGCTCTTCTGGTCGCACCCCGTC  
TCGCTCGCTCTCCCGAGTACGTACGTGTGTATGCGTGTGTTTGTGCTCCTCCTTTGT  
TCCTTTTTTACAGCTGTTTGAAGATGACTCCACTTGGGGAATCCTGGTCAGGTGTCCGGT  
GTCAGGGGATTTTTCCTTGAGCTTTGGGGTTGGAAATAACATAACTCTGGACCTATTGGA  
ACTTATATAATTTATAGAACACGGTTAATGCGTCGCTTGACAAAAAACAACAAAACA  
CTGTGGAATGCTTCCTAGGGTTGTCACTGCATTCTGCGC

>Adult-type2

GTCAGGTTTCGTGTGGCATTGGGCGCAATTGAAGAGTTTCAGACCCCCAAGATGTTCCAAG  
AAAATGCGTCCCATTGTGCTCCCTCCTCTACCTCACTCGCTCTTCTGGTCGCACCCCGTCT  
CGCTCGCTCTCCCGAGTACGTACGTGTGTATGCGTGTGTTTGTGCTCCTCCTTTGTT  
CCTTTTTTACAGCTGTTTGAAGATGACTCCACTTGGGGAATCCTGGTCAGGTGTCCGGTG  
TCAGGGGATTTTTCCTTGAGCTTTGGGGTCTGGTAACCTTCGAGCGAACGGCAACCATCAA  
CGGCTCTGAATTTCGTAAATCTAAGGAAAACACTAAGCAAGCAGCCAGGCATCGTGCGTTC  
ACCACTACTTAACATCGTCGGCCACGACCTGTGCTCAGTATACCTCTGCTACACCGGAT  
GAGTAACGAAAACCTACATTCCATCCAAAACCTTATGGATGACGTGGAATCTGAAGGCTC  
GCCAGACTCTGGTTCGTGGCTGGTGTGGTCCTAAACTTCGGCTTGATTGGCTCTCTCGC  
CCTTTATCTGGCATTAAGGAGAAGACGAGCCTCTAGGGAGATACAGCGCACCATCGATAC  
TTTCAACATGACCGAGGACGGTCATAAACTTGAGGGGGGAGTAGTTAACAATAACAAT  
GTATTGCTTCGTAGCAACTAAGTAGCTTTGTATGAACAATGCTGACGCGCCAGAATTGG  
GTTCAACGCTCCACGCGAAGAATGCCTGGCAGCGGAAAGCTGACACTTCCTACCGGGAGT  
GTTGCTTCACGCTGCAAGAAATGCTGAGTCGGCTTGCCGACTTGTGGCGGCGCGATGCAT

TGCTCGAGGGTAAACTTAGTTTTCAATATTGTCTTCTACTCAGTTCAAATCTTGTGTGCGA  
AATAAACCACAGCTTGCTCCGGCTCATTGCCGTTAAACATCATTGTTCTTATTTACAATC  
AAATCGCTATCGCCACAAGGCTAGTGATAATAACTAAGGGGGCGAAGTCAAGCCCTCCA  
ACCTAATCTCCATAAACAGTGTCTAAGACGAACCTCAGCGAAAGAAGGAAGATCTCTAG  
ACCTACTGGAATAACATAACTCTGGACCTATTGGAACCTATATAATTTATAGAACACG  
GTTAATGCGTCGCTTGACAAAAAAACAACAAAACACTGTGGAATGCTTCCTAGGGTTG  
TCACTGCATTCTGCG

>Adult-type6

GTCAGGTTTCGTGTGGCATTGGGCGCAATTGAAGAGTTTCAGACCCCCAAGATGTTCCAAG  
AAAATGCGTCCCATTTGTGCTCCCTCCTCTACCTCACTCGCTCTTCTGGTCGCACCCCGTCT  
CGCTCGCTCTCCCGAGTACGTACGTGTGTATGCGTGTGTTTGTGTTGTGCTCCTCCTTTGTT  
CCTCAGCGAAAGAAGGAAGATCTCTAGACCTACTGGAAATAACATAACTCTGGACCTAT  
TGGAACCTATATAATTTATAGAACACGGTTAATGCGTCGCTTGACAAAAAAACAACAA  
AACACTGTGGAATGCTTCCTAGGGTTGTCACCTGCATTCTGCG

>Adult-type7

CGCAGAATGCAGTGACAACCCTAGGAAGCATTCCACAGTGTTTTGTTGTTTTTTTGTGCA  
AGCGACGCATTAACCGTGTTCTATAAATTATATAAGTTCCAATAGGTCCAGAGTTATGT  
TATTTCCAGTAGGTCTAGAGATCTTCCTTCTTTTCGCTGAGACCCCAAAGCTCAAGGAAAA  
TCCCCTGACACCGGACACCTGACCAGGATTCCCCAAGTGGAGTCATCTTCAAACAGCTGT  
GAAAAAGGAACAAAGGAGGAGCACAAACAACACACGCATACACACGTACGTACTCGGGA  
GAGCGAGCGAGACGGGGTGCGACCAGAAGAGCGAGTGAGGTAGAGGAGGGAGCACAAATG  
GGACGCATTTTCTTGGAACATCTTGGGGGTCTGAAACTCTTCAATTGCGCCCAATGCCAC  
ACGAACCTGACC

>Adult-type8

GGTCAGGTTTCGTGTGGCATTGGGCGCAATTGAAGAGTTTCAGACCCCCAAGATGTTCCAA  
GAAAATGCGTCCCATTTGTGCTCCCTCCTCTACCTCACTCGCTCTTCTGGTCGCACCCCGTC  
TCGCTCGCTCTCCCGAGTACGTACGTGTGTATGCGTGTGTTTGTGTTGTGCTCCTCCTTTGT  
TCCTTTTTTCACAGCTGTTTGAAGATGACTCCACTTGGGGAATCCTGGTCAGGTGTCCGGT  
GTCAGGGGATTTTCCTTGAGCTTTGGGGTCTCGGCTTTATTGTCAGTAAGGACGGAACCTA  
AATCCGATCCAGAGAAGGTGAAGGCCATTCAGGAGTACCCTGAACCAGACTGCGTTTACA  
AGGTTAGGTCTTCCTTGGTTTAGCCAGCTACTACAGAGTCTTCATCAAAGACTTTGCTG  
CCATAGCCCGCCCGATCACCGATATCCTCAGCGAAAGAAGGAAGATCTCTAGACCTACTG  
GAAATAACATAACTCTGGACCTATTGGAACCTATATAATTTATAGAACACGGTTAATGC  
GTCGCTTGACAAAAAAACAACAAAACACTGTGGAATGCTTCCTAGGGTTGTCACCTGCAT  
TCTGCGC



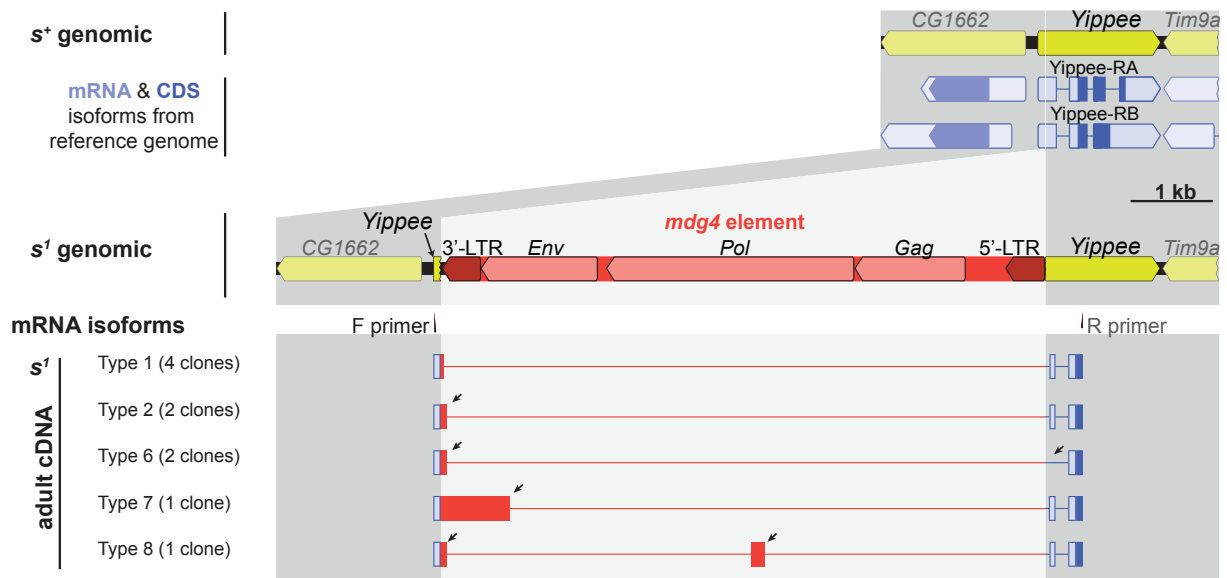

**Figure S6.** Identified isoforms of *Yippee* from adult *s<sup>1</sup>* cDNA. This is a similar experiment to the pupal data shown in Figure 6. Arrowheads point to segments of *s<sup>1</sup>* cDNAs that differed from the typical splice pattern. Adult male *w<sup>1118</sup> s<sup>1</sup>* flies were ground in Trizol (Thermo Fisher) using microtube pestles and RNA isolated with the Direct-Zol RNA Miniprep kit (Zymo Research). RNAs were then DNase treated, oligo-dT annealed, and cDNA synthesized using the SuperScript IV First-Strand Synthesis System with EZ DNase (Thermo Fisher). cDNA was PCR amplified using the primers Yippee-9F and Yippee-seq-R3, products cloned into pGem-T-Easy, and sequenced. The primers used in this assay did not contain the entire *Yippee* coding sequence, so inference about the coding capacity was not possible. mRNA isoforms Type 1 and Type 2 were also observed in pupae (Figure 6).

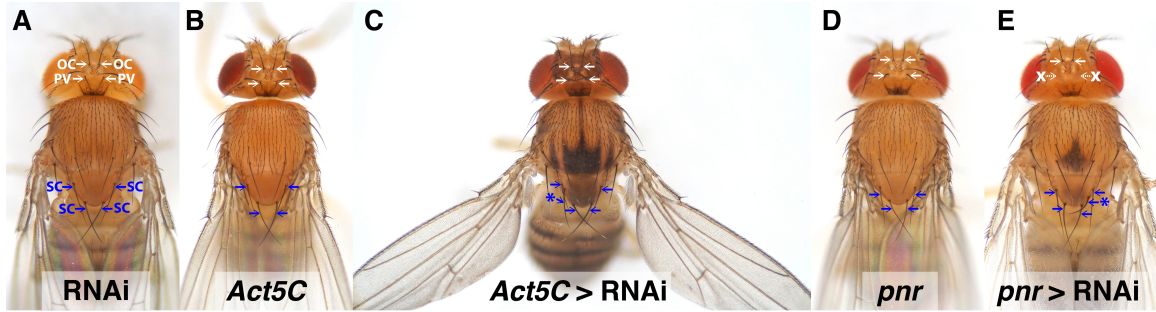

**Figure S7.** Loss of *Yippee* function affects bristle numbers. High-resolution version of Figure 3A-E to emphasize examples of *Yippee* bristle phenotypes. (A) RNAi-only control ( $w^{1118}; +/UAS-YippeeRNAi$ ). (B) *Act5C*-GAL4-only control, ( $w^{1118}; Act5C-GAL4/+$ ). Both (A) and (B) have the wild-type complement of 4 scutellar bristles on the posterior thorax (SC, blue arrows), two ocellar bristles just anterior to the ocelli (OC, white arrows), and two postvertical bristles just posterior to the ocelli (PV, white arrows). (C) *Act5C* > RNAi fly ( $w^{1118}; Act5C-GAL4/UAS-YippeeRNAi$ ), with dark body color, outheld/curved wings, and also an ectopic scutellar bristle (\*). (D) A *pnr*-GAL4-only control ( $w^{1118}; pnr-GAL4/+$ ) has the wild-type number of scutellar, ocellar, and postvertical bristles. (E) In addition to having dark body color in patches along the dorsal midline, this *pnr* > RNAi fly ( $w^{1118}; pnr-GAL4/UAS-YippeeRNAi$ ) has an ectopic scutellar bristle (\*) and is missing both postvertical bristles (X marks with dashed white arrows). In other cases not shown in this figure, *pnr* > UAS-*Yippee*RNAi and *s<sup>1</sup>/Df(1)Exel6245* flies were missing ocellar bristles instead of or in addition to postvertical bristles. See Table 1 for quantitative bristle data.
