# Supplementary material
Source: publisher figshare collection journal article supplement (https://gsajournals.figshare.com/articles/dataset/_/19059725)
Supplement: Supplementary file 1 [file 2]

## Sheet: Expt 2-Figure 2F data
Genotype	Gray value	fly	pixel	flyid	pixelid
s+/s+	55	1	1	s+/s+_1	s+/s+_1_1
s+/s+	53	1	2	s+/s+_1	s+/s+_1_2
s+/s+	61	1	3	s+/s+_1	s+/s+_1_3
s+/s+	57	1	4	s+/s+_1	s+/s+_1_4
s+/s+	49	1	5	s+/s+_1	s+/s+_1_5
s+/s+	46	1	6	s+/s+_1	s+/s+_1_6
s+/s+	65	1	7	s+/s+_1	s+/s+_1_7
s+/s+	51	1	8	s+/s+_1	s+/s+_1_8
s+/s+	53	1	9	s+/s+_1	s+/s+_1_9
s+/s+	42	1	10	s+/s+_1	s+/s+_1_10
s+/s+	51	1	11	s+/s+_1	s+/s+_1_11
s+/s+	52	1	12	s+/s+_1	s+/s+_1_12
s+/s+	50	1	13	s+/s+_1	s+/s+_1_13
s+/s+	51	1	14	s+/s+_1	s+/s+_1_14
s+/s+	36	1	15	s+/s+_1	s+/s+_1_15
s+/s+	49	1	16	s+/s+_1	s+/s+_1_16
s+/s+	45	1	17	s+/s+_1	s+/s+_1_17
s+/s+	55	1	18	s+/s+_1	s+/s+_1_18
s+/s+	50	1	19	s+/s+_1	s+/s+_1_19
s+/s+	57	1	20	s+/s+_1	s+/s+_1_20
s+/s+	69	2	1	s+/s+_2	s+/s+_2_1
s+/s+	64	2	2	s+/s+_2	s+/s+_2_2
s+/s+	56	2	3	s+/s+_2	s+/s+_2_3
s+/s+	65	2	4	s+/s+_2	s+/s+_2_4
s+/s+	69	2	5	s+/s+_2	s+/s+_2_5
s+/s+	55	2	6	s+/s+_2	s+/s+_2_6
s+/s+	61	2	7	s+/s+_2	s+/s+_2_7
s+/s+	58	2	8	s+/s+_2	s+/s+_2_8
s+/s+	53	2	9	s+/s+_2	s+/s+_2_9
s+/s+	55	2	10	s+/s+_2	s+/s+_2_10
s+/s+	61	2	11	s+/s+_2	s+/s+_2_11
s+/s+	57	2	12	s+/s+_2	s+/s+_2_12
s+/s+	55	2	13	s+/s+_2	s+/s+_2_13
s+/s+	50	2	14	s+/s+_2	s+/s+_2_14
s+/s+	44	2	15	s+/s+_2	s+/s+_2_15
s+/s+	57	2	16	s+/s+_2	s+/s+_2_16
s+/s+	61	2	17	s+/s+_2	s+/s+_2_17
s+/s+	49	2	18	s+/s+_2	s+/s+_2_18
s+/s+	53	2	19	s+/s+_2	s+/s+_2_19
s+/s+	59	2	20	s+/s+_2	s+/s+_2_20
s+/s+	54	3	1	s+/s+_3	s+/s+_3_1
s+/s+	47	3	2	s+/s+_3	s+/s+_3_2
s+/s+	56	3	3	s+/s+_3	s+/s+_3_3
s+/s+	50	3	4	s+/s+_3	s+/s+_3_4
s+/s+	51	3	5	s+/s+_3	s+/s+_3_5
s+/s+	45	3	6	s+/s+_3	s+/s+_3_6
s+/s+	44	3	7	s+/s+_3	s+/s+_3_7
s+/s+	40	3	8	s+/s+_3	s+/s+_3_8
s+/s+	31	3	9	s+/s+_3	s+/s+_3_9
s+/s+	50	3	10	s+/s+_3	s+/s+_3_10
s+/s+	48	3	11	s+/s+_3	s+/s+_3_11
s+/s+	49	3	12	s+/s+_3	s+/s+_3_12
s+/s+	44	3	13	s+/s+_3	s+/s+_3_13
s+/s+	40	3	14	s+/s+_3	s+/s+_3_14
s+/s+	49	3	15	s+/s+_3	s+/s+_3_15
s+/s+	43	3	16	s+/s+_3	s+/s+_3_16
s+/s+	44	3	17	s+/s+_3	s+/s+_3_17
s+/s+	43	3	18	s+/s+_3	s+/s+_3_18
s+/s+	41	3	19	s+/s+_3	s+/s+_3_19
s+/s+	49	3	20	s+/s+_3	s+/s+_3_20
s+/s+	59	4	1	s+/s+_4	s+/s+_4_1
s+/s+	50	4	2	s+/s+_4	s+/s+_4_2
s+/s+	57	4	3	s+/s+_4	s+/s+_4_3
s+/s+	62	4	4	s+/s+_4	s+/s+_4_4
s+/s+	56	4	5	s+/s+_4	s+/s+_4_5
s+/s+	43	4	6	s+/s+_4	s+/s+_4_6
s+/s+	42	4	7	s+/s+_4	s+/s+_4_7
s+/s+	57	4	8	s+/s+_4	s+/s+_4_8
s+/s+	35	4	9	s+/s+_4	s+/s+_4_9
s+/s+	37	4	10	s+/s+_4	s+/s+_4_10
s+/s+	44	4	11	s+/s+_4	s+/s+_4_11
s+/s+	44	4	12	s+/s+_4	s+/s+_4_12
s+/s+	46	4	13	s+/s+_4	s+/s+_4_13
s+/s+	48	4	14	s+/s+_4	s+/s+_4_14
s+/s+	48	4	15	s+/s+_4	s+/s+_4_15
s+/s+	50	4	16	s+/s+_4	s+/s+_4_16
s+/s+	45	4	17	s+/s+_4	s+/s+_4_17
s+/s+	48	4	18	s+/s+_4	s+/s+_4_18
s+/s+	49	4	19	s+/s+_4	s+/s+_4_19
s+/s+	44	4	20	s+/s+_4	s+/s+_4_20
s+/s+	66	5	1	s+/s+_5	s+/s+_5_1
s+/s+	39	5	2	s+/s+_5	s+/s+_5_2
s+/s+	65	5	3	s+/s+_5	s+/s+_5_3
s+/s+	55	5	4	s+/s+_5	s+/s+_5_4
s+/s+	60	5	5	s+/s+_5	s+/s+_5_5
s+/s+	40	5	6	s+/s+_5	s+/s+_5_6
s+/s+	59	5	7	s+/s+_5	s+/s+_5_7
s+/s+	38	5	8	s+/s+_5	s+/s+_5_8
s+/s+	69	5	9	s+/s+_5	s+/s+_5_9
s+/s+	55	5	10	s+/s+_5	s+/s+_5_10
s+/s+	56	5	11	s+/s+_5	s+/s+_5_11
s+/s+	53	5	12	s+/s+_5	s+/s+_5_12
s+/s+	33	5	13	s+/s+_5	s+/s+_5_13
s+/s+	66	5	14	s+/s+_5	s+/s+_5_14
s+/s+	80	5	15	s+/s+_5	s+/s+_5_15
s+/s+	81	5	16	s+/s+_5	s+/s+_5_16
s+/s+	77	5	17	s+/s+_5	s+/s+_5_17
s+/s+	67	5	18	s+/s+_5	s+/s+_5_18
s+/s+	68	5	19	s+/s+_5	s+/s+_5_19
s+/s+	66	5	20	s+/s+_5	s+/s+_5_20
s+/s+	54	6	1	s+/s+_6	s+/s+_6_1
s+/s+	51	6	2	s+/s+_6	s+/s+_6_2
s+/s+	38	6	3	s+/s+_6	s+/s+_6_3
s+/s+	45	6	4	s+/s+_6	s+/s+_6_4
s+/s+	41	6	5	s+/s+_6	s+/s+_6_5
s+/s+	50	6	6	s+/s+_6	s+/s+_6_6
s+/s+	38	6	7	s+/s+_6	s+/s+_6_7
s+/s+	44	6	8	s+/s+_6	s+/s+_6_8
s+/s+	52	6	9	s+/s+_6	s+/s+_6_9
s+/s+	43	6	10	s+/s+_6	s+/s+_6_10
s+/s+	41	6	11	s+/s+_6	s+/s+_6_11
s+/s+	40	6	12	s+/s+_6	s+/s+_6_12
s+/s+	46	6	13	s+/s+_6	s+/s+_6_13
s+/s+	55	6	14	s+/s+_6	s+/s+_6_14
s+/s+	34	6	15	s+/s+_6	s+/s+_6_15
s+/s+	49	6	16	s+/s+_6	s+/s+_6_16
s+/s+	44	6	17	s+/s+_6	s+/s+_6_17
s+/s+	59	6	18	s+/s+_6	s+/s+_6_18
s+/s+	48	6	19	s+/s+_6	s+/s+_6_19
s+/s+	43	6	20	s+/s+_6	s+/s+_6_20
s+/s+	61	7	1	s+/s+_7	s+/s+_7_1
s+/s+	66	7	2	s+/s+_7	s+/s+_7_2
s+/s+	68	7	3	s+/s+_7	s+/s+_7_3
s+/s+	70	7	4	s+/s+_7	s+/s+_7_4
s+/s+	63	7	5	s+/s+_7	s+/s+_7_5
s+/s+	65	7	6	s+/s+_7	s+/s+_7_6
s+/s+	69	7	7	s+/s+_7	s+/s+_7_7
s+/s+	67	7	8	s+/s+_7	s+/s+_7_8
s+/s+	67	7	9	s+/s+_7	s+/s+_7_9
s+/s+	62	7	10	s+/s+_7	s+/s+_7_10
s+/s+	68	7	11	s+/s+_7	s+/s+_7_11
s+/s+	54	7	12	s+/s+_7	s+/s+_7_12
s+/s+	68	7	13	s+/s+_7	s+/s+_7_13
s+/s+	70	7	14	s+/s+_7	s+/s+_7_14
s+/s+	58	7	15	s+/s+_7	s+/s+_7_15
s+/s+	71	7	16	s+/s+_7	s+/s+_7_16
s+/s+	70	7	17	s+/s+_7	s+/s+_7_17
s+/s+	82	7	18	s+/s+_7	s+/s+_7_18
s+/s+	80	7	19	s+/s+_7	s+/s+_7_19
s+/s+	69	7	20	s+/s+_7	s+/s+_7_20
s+/s+	43	8	1	s+/s+_8	s+/s+_8_1
s+/s+	46	8	2	s+/s+_8	s+/s+_8_2
s+/s+	53	8	3	s+/s+_8	s+/s+_8_3
s+/s+	54	8	4	s+/s+_8	s+/s+_8_4
s+/s+	62	8	5	s+/s+_8	s+/s+_8_5
s+/s+	64	8	6	s+/s+_8	s+/s+_8_6
s+/s+	52	8	7	s+/s+_8	s+/s+_8_7
s+/s+	44	8	8	s+/s+_8	s+/s+_8_8
s+/s+	43	8	9	s+/s+_8	s+/s+_8_9
s+/s+	45	8	10	s+/s+_8	s+/s+_8_10
s+/s+	40	8	11	s+/s+_8	s+/s+_8_11
s+/s+	45	8	12	s+/s+_8	s+/s+_8_12
s+/s+	45	8	13	s+/s+_8	s+/s+_8_13
s+/s+	50	8	14	s+/s+_8	s+/s+_8_14
s+/s+	41	8	15	s+/s+_8	s+/s+_8_15
s+/s+	50	8	16	s+/s+_8	s+/s+_8_16
s+/s+	67	8	17	s+/s+_8	s+/s+_8_17
s+/s+	61	8	18	s+/s+_8	s+/s+_8_18
s+/s+	58	8	19	s+/s+_8	s+/s+_8_19
s+/s+	60	8	20	s+/s+_8	s+/s+_8_20
s+/s+	66	9	1	s+/s+_9	s+/s+_9_1
s+/s+	52	9	2	s+/s+_9	s+/s+_9_2
s+/s+	57	9	3	s+/s+_9	s+/s+_9_3
s+/s+	58	9	4	s+/s+_9	s+/s+_9_4
s+/s+	61	9	5	s+/s+_9	s+/s+_9_5
s+/s+	69	9	6	s+/s+_9	s+/s+_9_6
s+/s+	57	9	7	s+/s+_9	s+/s+_9_7
s+/s+	50	9	8	s+/s+_9	s+/s+_9_8
s+/s+	41	9	9	s+/s+_9	s+/s+_9_9
s+/s+	67	9	10	s+/s+_9	s+/s+_9_10
s+/s+	64	9	11	s+/s+_9	s+/s+_9_11
s+/s+	57	9	12	s+/s+_9	s+/s+_9_12
s+/s+	60	9	13	s+/s+_9	s+/s+_9_13
s+/s+	58	9	14	s+/s+_9	s+/s+_9_14
s+/s+	61	9	15	s+/s+_9	s+/s+_9_15
s+/s+	59	9	16	s+/s+_9	s+/s+_9_16
s+/s+	56	9	17	s+/s+_9	s+/s+_9_17
s+/s+	59	9	18	s+/s+_9	s+/s+_9_18
s+/s+	55	9	19	s+/s+_9	s+/s+_9_19
s+/s+	58	9	20	s+/s+_9	s+/s+_9_20
s+/s+	42	10	1	s+/s+_10	s+/s+_10_1
s+/s+	60	10	2	s+/s+_10	s+/s+_10_2
s+/s+	57	10	3	s+/s+_10	s+/s+_10_3
s+/s+	55	10	4	s+/s+_10	s+/s+_10_4
s+/s+	58	10	5	s+/s+_10	s+/s+_10_5
s+/s+	58	10	6	s+/s+_10	s+/s+_10_6
s+/s+	58	10	7	s+/s+_10	s+/s+_10_7
s+/s+	63	10	8	s+/s+_10	s+/s+_10_8
s+/s+	65	10	9	s+/s+_10	s+/s+_10_9
s+/s+	69	10	10	s+/s+_10	s+/s+_10_10
s+/s+	64	10	11	s+/s+_10	s+/s+_10_11
s+/s+	44	10	12	s+/s+_10	s+/s+_10_12
s+/s+	63	10	13	s+/s+_10	s+/s+_10_13
s+/s+	65	10	14	s+/s+_10	s+/s+_10_14
s+/s+	56	10	15	s+/s+_10	s+/s+_10_15
s+/s+	42	10	16	s+/s+_10	s+/s+_10_16
s+/s+	60	10	17	s+/s+_10	s+/s+_10_17
s+/s+	70	10	18	s+/s+_10	s+/s+_10_18
s+/s+	72	10	19	s+/s+_10	s+/s+_10_19
s+/s+	62	10	20	s+/s+_10	s+/s+_10_20
s+/s+	68	11	1	s+/s+_11	s+/s+_11_1
s+/s+	70	11	2	s+/s+_11	s+/s+_11_2
s+/s+	67	11	3	s+/s+_11	s+/s+_11_3
s+/s+	68	11	4	s+/s+_11	s+/s+_11_4
s+/s+	69	11	5	s+/s+_11	s+/s+_11_5
s+/s+	86	11	6	s+/s+_11	s+/s+_11_6
s+/s+	71	11	7	s+/s+_11	s+/s+_11_7
s+/s+	84	11	8	s+/s+_11	s+/s+_11_8
s+/s+	77	11	9	s+/s+_11	s+/s+_11_9
s+/s+	85	11	10	s+/s+_11	s+/s+_11_10
s+/s+	67	11	11	s+/s+_11	s+/s+_11_11
s+/s+	69	11	12	s+/s+_11	s+/s+_11_12
s+/s+	63	11	13	s+/s+_11	s+/s+_11_13
s+/s+	60	11	14	s+/s+_11	s+/s+_11_14
s+/s+	61	11	15	s+/s+_11	s+/s+_11_15
s+/s+	74	11	16	s+/s+_11	s+/s+_11_16
s+/s+	69	11	17	s+/s+_11	s+/s+_11_17
s+/s+	82	11	18	s+/s+_11	s+/s+_11_18
s+/s+	76	11	19	s+/s+_11	s+/s+_11_19
s+/s+	80	11	20	s+/s+_11	s+/s+_11_20
s+/s+	55	12	1	s+/s+_12	s+/s+_12_1
s+/s+	59	12	2	s+/s+_12	s+/s+_12_2
s+/s+	71	12	3	s+/s+_12	s+/s+_12_3
s+/s+	75	12	4	s+/s+_12	s+/s+_12_4
s+/s+	82	12	5	s+/s+_12	s+/s+_12_5
s+/s+	72	12	6	s+/s+_12	s+/s+_12_6
s+/s+	67	12	7	s+/s+_12	s+/s+_12_7
s+/s+	74	12	8	s+/s+_12	s+/s+_12_8
s+/s+	74	12	9	s+/s+_12	s+/s+_12_9
s+/s+	82	12	10	s+/s+_12	s+/s+_12_10
s+/s+	73	12	11	s+/s+_12	s+/s+_12_11
s+/s+	82	12	12	s+/s+_12	s+/s+_12_12
s+/s+	73	12	13	s+/s+_12	s+/s+_12_13
s+/s+	88	12	14	s+/s+_12	s+/s+_12_14
s+/s+	86	12	15	s+/s+_12	s+/s+_12_15
s+/s+	66	12	16	s+/s+_12	s+/s+_12_16
s+/s+	87	12	17	s+/s+_12	s+/s+_12_17
s+/s+	86	12	18	s+/s+_12	s+/s+_12_18
s+/s+	69	12	19	s+/s+_12	s+/s+_12_19
s+/s+	72	12	20	s+/s+_12	s+/s+_12_20
s+/s+	48	13	1	s+/s+_13	s+/s+_13_1
s+/s+	42	13	2	s+/s+_13	s+/s+_13_2
s+/s+	40	13	3	s+/s+_13	s+/s+_13_3
s+/s+	40	13	4	s+/s+_13	s+/s+_13_4
s+/s+	60	13	5	s+/s+_13	s+/s+_13_5
s+/s+	61	13	6	s+/s+_13	s+/s+_13_6
s+/s+	51	13	7	s+/s+_13	s+/s+_13_7
s+/s+	49	13	8	s+/s+_13	s+/s+_13_8
s+/s+	40	13	9	s+/s+_13	s+/s+_13_9
s+/s+	47	13	10	s+/s+_13	s+/s+_13_10
s+/s+	38	13	11	s+/s+_13	s+/s+_13_11
s+/s+	64	13	12	s+/s+_13	s+/s+_13_12
s+/s+	51	13	13	s+/s+_13	s+/s+_13_13
s+/s+	55	13	14	s+/s+_13	s+/s+_13_14
s+/s+	60	13	15	s+/s+_13	s+/s+_13_15
s+/s+	60	13	16	s+/s+_13	s+/s+_13_16
s+/s+	46	13	17	s+/s+_13	s+/s+_13_17
s+/s+	41	13	18	s+/s+_13	s+/s+_13_18
s+/s+	45	13	19	s+/s+_13	s+/s+_13_19
s+/s+	45	13	20	s+/s+_13	s+/s+_13_20
s+/s+	45	14	1	s+/s+_14	s+/s+_14_1
s+/s+	52	14	2	s+/s+_14	s+/s+_14_2
s+/s+	56	14	3	s+/s+_14	s+/s+_14_3
s+/s+	56	14	4	s+/s+_14	s+/s+_14_4
s+/s+	63	14	5	s+/s+_14	s+/s+_14_5
s+/s+	57	14	6	s+/s+_14	s+/s+_14_6
s+/s+	55	14	7	s+/s+_14	s+/s+_14_7
s+/s+	48	14	8	s+/s+_14	s+/s+_14_8
s+/s+	43	14	9	s+/s+_14	s+/s+_14_9
s+/s+	49	14	10	s+/s+_14	s+/s+_14_10
s+/s+	51	14	11	s+/s+_14	s+/s+_14_11
s+/s+	39	14	12	s+/s+_14	s+/s+_14_12
s+/s+	41	14	13	s+/s+_14	s+/s+_14_13
s+/s+	41	14	14	s+/s+_14	s+/s+_14_14
s+/s+	44	14	15	s+/s+_14	s+/s+_14_15
s+/s+	56	14	16	s+/s+_14	s+/s+_14_16
s+/s+	61	14	17	s+/s+_14	s+/s+_14_17
s+/s+	43	14	18	s+/s+_14	s+/s+_14_18
s+/s+	58	14	19	s+/s+_14	s+/s+_14_19
s+/s+	57	14	20	s+/s+_14	s+/s+_14_20
s+/s+	40	15	1	s+/s+_15	s+/s+_15_1
s+/s+	47	15	2	s+/s+_15	s+/s+_15_2
s+/s+	50	15	3	s+/s+_15	s+/s+_15_3
s+/s+	57	15	4	s+/s+_15	s+/s+_15_4
s+/s+	53	15	5	s+/s+_15	s+/s+_15_5
s+/s+	48	15	6	s+/s+_15	s+/s+_15_6
s+/s+	54	15	7	s+/s+_15	s+/s+_15_7
s+/s+	48	15	8	s+/s+_15	s+/s+_15_8
s+/s+	46	15	9	s+/s+_15	s+/s+_15_9
s+/s+	37	15	10	s+/s+_15	s+/s+_15_10
s+/s+	42	15	11	s+/s+_15	s+/s+_15_11
s+/s+	48	15	12	s+/s+_15	s+/s+_15_12
s+/s+	59	15	13	s+/s+_15	s+/s+_15_13
s+/s+	53	15	14	s+/s+_15	s+/s+_15_14
s+/s+	61	15	15	s+/s+_15	s+/s+_15_15
s+/s+	52	15	16	s+/s+_15	s+/s+_15_16
s+/s+	54	15	17	s+/s+_15	s+/s+_15_17
s+/s+	44	15	18	s+/s+_15	s+/s+_15_18
s+/s+	44	15	19	s+/s+_15	s+/s+_15_19
s+/s+	35	15	20	s+/s+_15	s+/s+_15_20
s+/s	60	1	1	s+/s_1	s+/s_1_1
s+/s	55	1	2	s+/s_1	s+/s_1_2
s+/s	58	1	3	s+/s_1	s+/s_1_3
s+/s	52	1	4	s+/s_1	s+/s_1_4
s+/s	57	1	5	s+/s_1	s+/s_1_5
s+/s	56	1	6	s+/s_1	s+/s_1_6
s+/s	53	1	7	s+/s_1	s+/s_1_7
s+/s	54	1	8	s+/s_1	s+/s_1_8
s+/s	51	1	9	s+/s_1	s+/s_1_9
s+/s	46	1	10	s+/s_1	s+/s_1_10
s+/s	45	1	11	s+/s_1	s+/s_1_11
s+/s	54	1	12	s+/s_1	s+/s_1_12
s+/s	55	1	13	s+/s_1	s+/s_1_13
s+/s	50	1	14	s+/s_1	s+/s_1_14
s+/s	57	1	15	s+/s_1	s+/s_1_15
s+/s	54	1	16	s+/s_1	s+/s_1_16
s+/s	63	1	17	s+/s_1	s+/s_1_17
s+/s	69	1	18	s+/s_1	s+/s_1_18
s+/s	59	1	19	s+/s_1	s+/s_1_19
s+/s	49	1	20	s+/s_1	s+/s_1_20
s+/s	57	2	1	s+/s_2	s+/s_2_1
s+/s	66	2	2	s+/s_2	s+/s_2_2
s+/s	68	2	3	s+/s_2	s+/s_2_3
s+/s	66	2	4	s+/s_2	s+/s_2_4
s+/s	60	2	5	s+/s_2	s+/s_2_5
s+/s	61	2	6	s+/s_2	s+/s_2_6
s+/s	64	2	7	s+/s_2	s+/s_2_7
s+/s	68	2	8	s+/s_2	s+/s_2_8
s+/s	70	2	9	s+/s_2	s+/s_2_9
s+/s	69	2	10	s+/s_2	s+/s_2_10
s+/s	65	2	11	s+/s_2	s+/s_2_11
s+/s	79	2	12	s+/s_2	s+/s_2_12
s+/s	67	2	13	s+/s_2	s+/s_2_13
s+/s	74	2	14	s+/s_2	s+/s_2_14
s+/s	73	2	15	s+/s_2	s+/s_2_15
s+/s	71	2	16	s+/s_2	s+/s_2_16
s+/s	73	2	17	s+/s_2	s+/s_2_17
s+/s	66	2	18	s+/s_2	s+/s_2_18
s+/s	68	2	19	s+/s_2	s+/s_2_19
s+/s	63	2	20	s+/s_2	s+/s_2_20
s+/s	66	3	1	s+/s_3	s+/s_3_1
s+/s	65	3	2	s+/s_3	s+/s_3_2
s+/s	64	3	3	s+/s_3	s+/s_3_3
s+/s	66	3	4	s+/s_3	s+/s_3_4
s+/s	79	3	5	s+/s_3	s+/s_3_5
s+/s	67	3	6	s+/s_3	s+/s_3_6
s+/s	74	3	7	s+/s_3	s+/s_3_7
s+/s	76	3	8	s+/s_3	s+/s_3_8
s+/s	79	3	9	s+/s_3	s+/s_3_9
s+/s	68	3	10	s+/s_3	s+/s_3_10
s+/s	70	3	11	s+/s_3	s+/s_3_11
s+/s	62	3	12	s+/s_3	s+/s_3_12
s+/s	80	3	13	s+/s_3	s+/s_3_13
s+/s	63	3	14	s+/s_3	s+/s_3_14
s+/s	81	3	15	s+/s_3	s+/s_3_15
s+/s	76	3	16	s+/s_3	s+/s_3_16
s+/s	77	3	17	s+/s_3	s+/s_3_17
s+/s	79	3	18	s+/s_3	s+/s_3_18
s+/s	79	3	19	s+/s_3	s+/s_3_19
s+/s	82	3	20	s+/s_3	s+/s_3_20
s+/s	57	4	1	s+/s_4	s+/s_4_1
s+/s	57	4	2	s+/s_4	s+/s_4_2
s+/s	55	4	3	s+/s_4	s+/s_4_3
s+/s	71	4	4	s+/s_4	s+/s_4_4
s+/s	64	4	5	s+/s_4	s+/s_4_5
s+/s	66	4	6	s+/s_4	s+/s_4_6
s+/s	67	4	7	s+/s_4	s+/s_4_7
s+/s	61	4	8	s+/s_4	s+/s_4_8
s+/s	46	4	9	s+/s_4	s+/s_4_9
s+/s	40	4	10	s+/s_4	s+/s_4_10
s+/s	57	4	11	s+/s_4	s+/s_4_11
s+/s	60	4	12	s+/s_4	s+/s_4_12
s+/s	52	4	13	s+/s_4	s+/s_4_13
s+/s	52	4	14	s+/s_4	s+/s_4_14
s+/s	62	4	15	s+/s_4	s+/s_4_15
s+/s	81	4	16	s+/s_4	s+/s_4_16
s+/s	59	4	17	s+/s_4	s+/s_4_17
s+/s	59	4	18	s+/s_4	s+/s_4_18
s+/s	58	4	19	s+/s_4	s+/s_4_19
s+/s	53	4	20	s+/s_4	s+/s_4_20
s+/s	75	5	1	s+/s_5	s+/s_5_1
s+/s	71	5	2	s+/s_5	s+/s_5_2
s+/s	66	5	3	s+/s_5	s+/s_5_3
s+/s	68	5	4	s+/s_5	s+/s_5_4
s+/s	61	5	5	s+/s_5	s+/s_5_5
s+/s	77	5	6	s+/s_5	s+/s_5_6
s+/s	66	5	7	s+/s_5	s+/s_5_7
s+/s	66	5	8	s+/s_5	s+/s_5_8
s+/s	58	5	9	s+/s_5	s+/s_5_9
s+/s	62	5	10	s+/s_5	s+/s_5_10
s+/s	77	5	11	s+/s_5	s+/s_5_11
s+/s	78	5	12	s+/s_5	s+/s_5_12
s+/s	67	5	13	s+/s_5	s+/s_5_13
s+/s	62	5	14	s+/s_5	s+/s_5_14
s+/s	64	5	15	s+/s_5	s+/s_5_15
s+/s	70	5	16	s+/s_5	s+/s_5_16
s+/s	61	5	17	s+/s_5	s+/s_5_17
s+/s	60	5	18	s+/s_5	s+/s_5_18
s+/s	66	5	19	s+/s_5	s+/s_5_19
s+/s	70	5	20	s+/s_5	s+/s_5_20
s+/s	59	6	1	s+/s_6	s+/s_6_1
s+/s	62	6	2	s+/s_6	s+/s_6_2
s+/s	71	6	3	s+/s_6	s+/s_6_3
s+/s	66	6	4	s+/s_6	s+/s_6_4
s+/s	60	6	5	s+/s_6	s+/s_6_5
s+/s	73	6	6	s+/s_6	s+/s_6_6
s+/s	70	6	7	s+/s_6	s+/s_6_7
s+/s	65	6	8	s+/s_6	s+/s_6_8
s+/s	62	6	9	s+/s_6	s+/s_6_9
s+/s	69	6	10	s+/s_6	s+/s_6_10
s+/s	67	6	11	s+/s_6	s+/s_6_11
s+/s	61	6	12	s+/s_6	s+/s_6_12
s+/s	75	6	13	s+/s_6	s+/s_6_13
s+/s	58	6	14	s+/s_6	s+/s_6_14
s+/s	62	6	15	s+/s_6	s+/s_6_15
s+/s	61	6	16	s+/s_6	s+/s_6_16
s+/s	61	6	17	s+/s_6	s+/s_6_17
s+/s	52	6	18	s+/s_6	s+/s_6_18
s+/s	70	6	19	s+/s_6	s+/s_6_19
s+/s	63	6	20	s+/s_6	s+/s_6_20
s+/s	65	7	1	s+/s_7	s+/s_7_1
s+/s	71	7	2	s+/s_7	s+/s_7_2
s+/s	72	7	3	s+/s_7	s+/s_7_3
s+/s	75	7	4	s+/s_7	s+/s_7_4
s+/s	68	7	5	s+/s_7	s+/s_7_5
s+/s	65	7	6	s+/s_7	s+/s_7_6
s+/s	75	7	7	s+/s_7	s+/s_7_7
s+/s	83	7	8	s+/s_7	s+/s_7_8
s+/s	86	7	9	s+/s_7	s+/s_7_9
s+/s	87	7	10	s+/s_7	s+/s_7_10
s+/s	66	7	11	s+/s_7	s+/s_7_11
s+/s	79	7	12	s+/s_7	s+/s_7_12
s+/s	47	7	13	s+/s_7	s+/s_7_13
s+/s	79	7	14	s+/s_7	s+/s_7_14
s+/s	79	7	15	s+/s_7	s+/s_7_15
s+/s	73	7	16	s+/s_7	s+/s_7_16
s+/s	88	7	17	s+/s_7	s+/s_7_17
s+/s	53	7	18	s+/s_7	s+/s_7_18
s+/s	75	7	19	s+/s_7	s+/s_7_19
s+/s	67	7	20	s+/s_7	s+/s_7_20
s+/s	65	8	1	s+/s_8	s+/s_8_1
s+/s	52	8	2	s+/s_8	s+/s_8_2
s+/s	62	8	3	s+/s_8	s+/s_8_3
s+/s	63	8	4	s+/s_8	s+/s_8_4
s+/s	74	8	5	s+/s_8	s+/s_8_5
s+/s	50	8	6	s+/s_8	s+/s_8_6
s+/s	70	8	7	s+/s_8	s+/s_8_7
s+/s	69	8	8	s+/s_8	s+/s_8_8
s+/s	70	8	9	s+/s_8	s+/s_8_9
s+/s	57	8	10	s+/s_8	s+/s_8_10
s+/s	75	8	11	s+/s_8	s+/s_8_11
s+/s	80	8	12	s+/s_8	s+/s_8_12
s+/s	87	8	13	s+/s_8	s+/s_8_13
s+/s	57	8	14	s+/s_8	s+/s_8_14
s+/s	72	8	15	s+/s_8	s+/s_8_15
s+/s	58	8	16	s+/s_8	s+/s_8_16
s+/s	62	8	17	s+/s_8	s+/s_8_17
s+/s	40	8	18	s+/s_8	s+/s_8_18
s+/s	56	8	19	s+/s_8	s+/s_8_19
s+/s	67	8	20	s+/s_8	s+/s_8_20
s+/s	57	9	1	s+/s_9	s+/s_9_1
s+/s	66	9	2	s+/s_9	s+/s_9_2
s+/s	54	9	3	s+/s_9	s+/s_9_3
s+/s	69	9	4	s+/s_9	s+/s_9_4
s+/s	73	9	5	s+/s_9	s+/s_9_5
s+/s	54	9	6	s+/s_9	s+/s_9_6
s+/s	67	9	7	s+/s_9	s+/s_9_7
s+/s	67	9	8	s+/s_9	s+/s_9_8
s+/s	63	9	9	s+/s_9	s+/s_9_9
s+/s	63	9	10	s+/s_9	s+/s_9_10
s+/s	67	9	11	s+/s_9	s+/s_9_11
s+/s	48	9	12	s+/s_9	s+/s_9_12
s+/s	67	9	13	s+/s_9	s+/s_9_13
s+/s	59	9	14	s+/s_9	s+/s_9_14
s+/s	73	9	15	s+/s_9	s+/s_9_15
s+/s	61	9	16	s+/s_9	s+/s_9_16
s+/s	55	9	17	s+/s_9	s+/s_9_17
s+/s	66	9	18	s+/s_9	s+/s_9_18
s+/s	76	9	19	s+/s_9	s+/s_9_19
s+/s	76	9	20	s+/s_9	s+/s_9_20
s+/s	51	10	1	s+/s_10	s+/s_10_1
s+/s	72	10	2	s+/s_10	s+/s_10_2
s+/s	61	10	3	s+/s_10	s+/s_10_3
s+/s	79	10	4	s+/s_10	s+/s_10_4
s+/s	71	10	5	s+/s_10	s+/s_10_5
s+/s	66	10	6	s+/s_10	s+/s_10_6
s+/s	58	10	7	s+/s_10	s+/s_10_7
s+/s	70	10	8	s+/s_10	s+/s_10_8
s+/s	68	10	9	s+/s_10	s+/s_10_9
s+/s	68	10	10	s+/s_10	s+/s_10_10
s+/s	76	10	11	s+/s_10	s+/s_10_11
s+/s	78	10	12	s+/s_10	s+/s_10_12
s+/s	74	10	13	s+/s_10	s+/s_10_13
s+/s	63	10	14	s+/s_10	s+/s_10_14
s+/s	76	10	15	s+/s_10	s+/s_10_15
s+/s	55	10	16	s+/s_10	s+/s_10_16
s+/s	70	10	17	s+/s_10	s+/s_10_17
s+/s	66	10	18	s+/s_10	s+/s_10_18
s+/s	74	10	19	s+/s_10	s+/s_10_19
s+/s	62	10	20	s+/s_10	s+/s_10_20
s+/s	55	11	1	s+/s_11	s+/s_11_1
s+/s	67	11	2	s+/s_11	s+/s_11_2
s+/s	57	11	3	s+/s_11	s+/s_11_3
s+/s	58	11	4	s+/s_11	s+/s_11_4
s+/s	57	11	5	s+/s_11	s+/s_11_5
s+/s	71	11	6	s+/s_11	s+/s_11_6
s+/s	67	11	7	s+/s_11	s+/s_11_7
s+/s	58	11	8	s+/s_11	s+/s_11_8
s+/s	57	11	9	s+/s_11	s+/s_11_9
s+/s	69	11	10	s+/s_11	s+/s_11_10
s+/s	70	11	11	s+/s_11	s+/s_11_11
s+/s	41	11	12	s+/s_11	s+/s_11_12
s+/s	61	11	13	s+/s_11	s+/s_11_13
s+/s	55	11	14	s+/s_11	s+/s_11_14
s+/s	52	11	15	s+/s_11	s+/s_11_15
s+/s	71	11	16	s+/s_11	s+/s_11_16
s+/s	73	11	17	s+/s_11	s+/s_11_17
s+/s	71	11	18	s+/s_11	s+/s_11_18
s+/s	74	11	19	s+/s_11	s+/s_11_19
s+/s	60	11	20	s+/s_11	s+/s_11_20
s+/s	48	12	1	s+/s_12	s+/s_12_1
s+/s	47	12	2	s+/s_12	s+/s_12_2
s+/s	57	12	3	s+/s_12	s+/s_12_3
s+/s	63	12	4	s+/s_12	s+/s_12_4
s+/s	73	12	5	s+/s_12	s+/s_12_5
s+/s	59	12	6	s+/s_12	s+/s_12_6
s+/s	64	12	7	s+/s_12	s+/s_12_7
s+/s	68	12	8	s+/s_12	s+/s_12_8
s+/s	46	12	9	s+/s_12	s+/s_12_9
s+/s	60	12	10	s+/s_12	s+/s_12_10
s+/s	48	12	11	s+/s_12	s+/s_12_11
s+/s	43	12	12	s+/s_12	s+/s_12_12
s+/s	45	12	13	s+/s_12	s+/s_12_13
s+/s	46	12	14	s+/s_12	s+/s_12_14
s+/s	47	12	15	s+/s_12	s+/s_12_15
s+/s	48	12	16	s+/s_12	s+/s_12_16
s+/s	41	12	17	s+/s_12	s+/s_12_17
s+/s	48	12	18	s+/s_12	s+/s_12_18
s+/s	44	12	19	s+/s_12	s+/s_12_19
s+/s	44	12	20	s+/s_12	s+/s_12_20
s+/s	64	13	1	s+/s_13	s+/s_13_1
s+/s	61	13	2	s+/s_13	s+/s_13_2
s+/s	72	13	3	s+/s_13	s+/s_13_3
s+/s	74	13	4	s+/s_13	s+/s_13_4
s+/s	61	13	5	s+/s_13	s+/s_13_5
s+/s	81	13	6	s+/s_13	s+/s_13_6
s+/s	78	13	7	s+/s_13	s+/s_13_7
s+/s	78	13	8	s+/s_13	s+/s_13_8
s+/s	80	13	9	s+/s_13	s+/s_13_9
s+/s	72	13	10	s+/s_13	s+/s_13_10
s+/s	85	13	11	s+/s_13	s+/s_13_11
s+/s	89	13	12	s+/s_13	s+/s_13_12
s+/s	67	13	13	s+/s_13	s+/s_13_13
s+/s	87	13	14	s+/s_13	s+/s_13_14
s+/s	76	13	15	s+/s_13	s+/s_13_15
s+/s	71	13	16	s+/s_13	s+/s_13_16
s+/s	65	13	17	s+/s_13	s+/s_13_17
s+/s	61	13	18	s+/s_13	s+/s_13_18
s+/s	73	13	19	s+/s_13	s+/s_13_19
s+/s	66	13	20	s+/s_13	s+/s_13_20
s+/s	61	14	1	s+/s_14	s+/s_14_1
s+/s	67	14	2	s+/s_14	s+/s_14_2
s+/s	64	14	3	s+/s_14	s+/s_14_3
s+/s	69	14	4	s+/s_14	s+/s_14_4
s+/s	62	14	5	s+/s_14	s+/s_14_5
s+/s	68	14	6	s+/s_14	s+/s_14_6
s+/s	42	14	7	s+/s_14	s+/s_14_7
s+/s	61	14	8	s+/s_14	s+/s_14_8
s+/s	61	14	9	s+/s_14	s+/s_14_9
s+/s	76	14	10	s+/s_14	s+/s_14_10
s+/s	82	14	11	s+/s_14	s+/s_14_11
s+/s	79	14	12	s+/s_14	s+/s_14_12
s+/s	54	14	13	s+/s_14	s+/s_14_13
s+/s	76	14	14	s+/s_14	s+/s_14_14
s+/s	54	14	15	s+/s_14	s+/s_14_15
s+/s	84	14	16	s+/s_14	s+/s_14_16
s+/s	78	14	17	s+/s_14	s+/s_14_17
s+/s	78	14	18	s+/s_14	s+/s_14_18
s+/s	67	14	19	s+/s_14	s+/s_14_19
s+/s	68	14	20	s+/s_14	s+/s_14_20
s+/s	75	15	1	s+/s_15	s+/s_15_1
s+/s	69	15	2	s+/s_15	s+/s_15_2
s+/s	70	15	3	s+/s_15	s+/s_15_3
s+/s	81	15	4	s+/s_15	s+/s_15_4
s+/s	67	15	5	s+/s_15	s+/s_15_5
s+/s	74	15	6	s+/s_15	s+/s_15_6
s+/s	61	15	7	s+/s_15	s+/s_15_7
s+/s	47	15	8	s+/s_15	s+/s_15_8
s+/s	74	15	9	s+/s_15	s+/s_15_9
s+/s	51	15	10	s+/s_15	s+/s_15_10
s+/s	65	15	11	s+/s_15	s+/s_15_11
s+/s	60	15	12	s+/s_15	s+/s_15_12
s+/s	65	15	13	s+/s_15	s+/s_15_13
s+/s	69	15	14	s+/s_15	s+/s_15_14
s+/s	67	15	15	s+/s_15	s+/s_15_15
s+/s	71	15	16	s+/s_15	s+/s_15_16
s+/s	50	15	17	s+/s_15	s+/s_15_17
s+/s	53	15	18	s+/s_15	s+/s_15_18
s+/s	68	15	19	s+/s_15	s+/s_15_19
s+/s	61	15	20	s+/s_15	s+/s_15_20
s/s	24	1	1	s/s_1	s/s_1_1
s/s	24	1	2	s/s_1	s/s_1_2
s/s	24	1	3	s/s_1	s/s_1_3
s/s	27	1	4	s/s_1	s/s_1_4
s/s	26	1	5	s/s_1	s/s_1_5
s/s	31	1	6	s/s_1	s/s_1_6
s/s	22	1	7	s/s_1	s/s_1_7
s/s	23	1	8	s/s_1	s/s_1_8
s/s	23	1	9	s/s_1	s/s_1_9
s/s	27	1	10	s/s_1	s/s_1_10
s/s	30	1	11	s/s_1	s/s_1_11
s/s	25	1	12	s/s_1	s/s_1_12
s/s	27	1	13	s/s_1	s/s_1_13
s/s	33	1	14	s/s_1	s/s_1_14
s/s	34	1	15	s/s_1	s/s_1_15
s/s	36	1	16	s/s_1	s/s_1_16
s/s	34	1	17	s/s_1	s/s_1_17
s/s	27	1	18	s/s_1	s/s_1_18
s/s	32	1	19	s/s_1	s/s_1_19
s/s	45	1	20	s/s_1	s/s_1_20
s/s	38	2	1	s/s_2	s/s_2_1
s/s	40	2	2	s/s_2	s/s_2_2
s/s	38	2	3	s/s_2	s/s_2_3
s/s	36	2	4	s/s_2	s/s_2_4
s/s	31	2	5	s/s_2	s/s_2_5
s/s	40	2	6	s/s_2	s/s_2_6
s/s	40	2	7	s/s_2	s/s_2_7
s/s	36	2	8	s/s_2	s/s_2_8
s/s	41	2	9	s/s_2	s/s_2_9
s/s	44	2	10	s/s_2	s/s_2_10
s/s	21	2	11	s/s_2	s/s_2_11
s/s	36	2	12	s/s_2	s/s_2_12
s/s	46	2	13	s/s_2	s/s_2_13
s/s	38	2	14	s/s_2	s/s_2_14
s/s	40	2	15	s/s_2	s/s_2_15
s/s	47	2	16	s/s_2	s/s_2_16
s/s	31	2	17	s/s_2	s/s_2_17
s/s	26	2	18	s/s_2	s/s_2_18
s/s	34	2	19	s/s_2	s/s_2_19
s/s	38	2	20	s/s_2	s/s_2_20
s/s	40	3	1	s/s_3	s/s_3_1
s/s	34	3	2	s/s_3	s/s_3_2
s/s	26	3	3	s/s_3	s/s_3_3
s/s	40	3	4	s/s_3	s/s_3_4
s/s	35	3	5	s/s_3	s/s_3_5
s/s	36	3	6	s/s_3	s/s_3_6
s/s	30	3	7	s/s_3	s/s_3_7
s/s	34	3	8	s/s_3	s/s_3_8
s/s	29	3	9	s/s_3	s/s_3_9
s/s	33	3	10	s/s_3	s/s_3_10
s/s	35	3	11	s/s_3	s/s_3_11
s/s	31	3	12	s/s_3	s/s_3_12
s/s	29	3	13	s/s_3	s/s_3_13
s/s	33	3	14	s/s_3	s/s_3_14
s/s	42	3	15	s/s_3	s/s_3_15
s/s	30	3	16	s/s_3	s/s_3_16
s/s	41	3	17	s/s_3	s/s_3_17
s/s	39	3	18	s/s_3	s/s_3_18
s/s	36	3	19	s/s_3	s/s_3_19
s/s	31	3	20	s/s_3	s/s_3_20
s/s	44	4	1	s/s_4	s/s_4_1
s/s	38	4	2	s/s_4	s/s_4_2
s/s	41	4	3	s/s_4	s/s_4_3
s/s	34	4	4	s/s_4	s/s_4_4
s/s	41	4	5	s/s_4	s/s_4_5
s/s	50	4	6	s/s_4	s/s_4_6
s/s	46	4	7	s/s_4	s/s_4_7
s/s	28	4	8	s/s_4	s/s_4_8
s/s	38	4	9	s/s_4	s/s_4_9
s/s	37	4	10	s/s_4	s/s_4_10
s/s	41	4	11	s/s_4	s/s_4_11
s/s	33	4	12	s/s_4	s/s_4_12
s/s	42	4	13	s/s_4	s/s_4_13
s/s	45	4	14	s/s_4	s/s_4_14
s/s	49	4	15	s/s_4	s/s_4_15
s/s	40	4	16	s/s_4	s/s_4_16
s/s	37	4	17	s/s_4	s/s_4_17
s/s	34	4	18	s/s_4	s/s_4_18
s/s	28	4	19	s/s_4	s/s_4_19
s/s	35	4	20	s/s_4	s/s_4_20
s/s	29	5	1	s/s_5	s/s_5_1
s/s	33	5	2	s/s_5	s/s_5_2
s/s	24	5	3	s/s_5	s/s_5_3
s/s	38	5	4	s/s_5	s/s_5_4
s/s	36	5	5	s/s_5	s/s_5_5
s/s	37	5	6	s/s_5	s/s_5_6
s/s	35	5	7	s/s_5	s/s_5_7
s/s	27	5	8	s/s_5	s/s_5_8
s/s	20	5	9	s/s_5	s/s_5_9
s/s	28	5	10	s/s_5	s/s_5_10
s/s	18	5	11	s/s_5	s/s_5_11
s/s	34	5	12	s/s_5	s/s_5_12
s/s	27	5	13	s/s_5	s/s_5_13
s/s	29	5	14	s/s_5	s/s_5_14
s/s	28	5	15	s/s_5	s/s_5_15
s/s	30	5	16	s/s_5	s/s_5_16
s/s	24	5	17	s/s_5	s/s_5_17
s/s	19	5	18	s/s_5	s/s_5_18
s/s	20	5	19	s/s_5	s/s_5_19
s/s	33	5	20	s/s_5	s/s_5_20
s/s	30	6	1	s/s_6	s/s_6_1
s/s	33	6	2	s/s_6	s/s_6_2
s/s	37	6	3	s/s_6	s/s_6_3
s/s	41	6	4	s/s_6	s/s_6_4
s/s	56	6	5	s/s_6	s/s_6_5
s/s	41	6	6	s/s_6	s/s_6_6
s/s	30	6	7	s/s_6	s/s_6_7
s/s	31	6	8	s/s_6	s/s_6_8
s/s	27	6	9	s/s_6	s/s_6_9
s/s	40	6	10	s/s_6	s/s_6_10
s/s	41	6	11	s/s_6	s/s_6_11
s/s	29	6	12	s/s_6	s/s_6_12
s/s	34	6	13	s/s_6	s/s_6_13
s/s	26	6	14	s/s_6	s/s_6_14
s/s	26	6	15	s/s_6	s/s_6_15
s/s	27	6	16	s/s_6	s/s_6_16
s/s	32	6	17	s/s_6	s/s_6_17
s/s	46	6	18	s/s_6	s/s_6_18
s/s	40	6	19	s/s_6	s/s_6_19
s/s	29	6	20	s/s_6	s/s_6_20
s/s	49	7	1	s/s_7	s/s_7_1
s/s	53	7	2	s/s_7	s/s_7_2
s/s	49	7	3	s/s_7	s/s_7_3
s/s	49	7	4	s/s_7	s/s_7_4
s/s	54	7	5	s/s_7	s/s_7_5
s/s	51	7	6	s/s_7	s/s_7_6
s/s	50	7	7	s/s_7	s/s_7_7
s/s	47	7	8	s/s_7	s/s_7_8
s/s	42	7	9	s/s_7	s/s_7_9
s/s	59	7	10	s/s_7	s/s_7_10
s/s	51	7	11	s/s_7	s/s_7_11
s/s	44	7	12	s/s_7	s/s_7_12
s/s	44	7	13	s/s_7	s/s_7_13
s/s	42	7	14	s/s_7	s/s_7_14
s/s	45	7	15	s/s_7	s/s_7_15
s/s	43	7	16	s/s_7	s/s_7_16
s/s	41	7	17	s/s_7	s/s_7_17
s/s	44	7	18	s/s_7	s/s_7_18
s/s	47	7	19	s/s_7	s/s_7_19
s/s	45	7	20	s/s_7	s/s_7_20
s/s	30	8	1	s/s_8	s/s_8_1
s/s	25	8	2	s/s_8	s/s_8_2
s/s	27	8	3	s/s_8	s/s_8_3
s/s	39	8	4	s/s_8	s/s_8_4
s/s	44	8	5	s/s_8	s/s_8_5
s/s	36	8	6	s/s_8	s/s_8_6
s/s	37	8	7	s/s_8	s/s_8_7
s/s	35	8	8	s/s_8	s/s_8_8
s/s	28	8	9	s/s_8	s/s_8_9
s/s	31	8	10	s/s_8	s/s_8_10
s/s	27	8	11	s/s_8	s/s_8_11
s/s	25	8	12	s/s_8	s/s_8_12
s/s	39	8	13	s/s_8	s/s_8_13
s/s	27	8	14	s/s_8	s/s_8_14
s/s	39	8	15	s/s_8	s/s_8_15
s/s	32	8	16	s/s_8	s/s_8_16
s/s	39	8	17	s/s_8	s/s_8_17
s/s	40	8	18	s/s_8	s/s_8_18
s/s	26	8	19	s/s_8	s/s_8_19
s/s	31	8	20	s/s_8	s/s_8_20
s/s	39	9	1	s/s_9	s/s_9_1
s/s	30	9	2	s/s_9	s/s_9_2
s/s	38	9	3	s/s_9	s/s_9_3
s/s	36	9	4	s/s_9	s/s_9_4
s/s	43	9	5	s/s_9	s/s_9_5
s/s	44	9	6	s/s_9	s/s_9_6
s/s	40	9	7	s/s_9	s/s_9_7
s/s	33	9	8	s/s_9	s/s_9_8
s/s	37	9	9	s/s_9	s/s_9_9
s/s	39	9	10	s/s_9	s/s_9_10
s/s	41	9	11	s/s_9	s/s_9_11
s/s	31	9	12	s/s_9	s/s_9_12
s/s	40	9	13	s/s_9	s/s_9_13
s/s	35	9	14	s/s_9	s/s_9_14
s/s	47	9	15	s/s_9	s/s_9_15
s/s	47	9	16	s/s_9	s/s_9_16
s/s	39	9	17	s/s_9	s/s_9_17
s/s	35	9	18	s/s_9	s/s_9_18
s/s	42	9	19	s/s_9	s/s_9_19
s/s	31	9	20	s/s_9	s/s_9_20
s/s	39	10	1	s/s_10	s/s_10_1
s/s	37	10	2	s/s_10	s/s_10_2
s/s	44	10	3	s/s_10	s/s_10_3
s/s	42	10	4	s/s_10	s/s_10_4
s/s	41	10	5	s/s_10	s/s_10_5
s/s	29	10	6	s/s_10	s/s_10_6
s/s	35	10	7	s/s_10	s/s_10_7
s/s	37	10	8	s/s_10	s/s_10_8
s/s	25	10	9	s/s_10	s/s_10_9
s/s	27	10	10	s/s_10	s/s_10_10
s/s	22	10	11	s/s_10	s/s_10_11
s/s	28	10	12	s/s_10	s/s_10_12
s/s	32	10	13	s/s_10	s/s_10_13
s/s	34	10	14	s/s_10	s/s_10_14
s/s	32	10	15	s/s_10	s/s_10_15
s/s	26	10	16	s/s_10	s/s_10_16
s/s	31	10	17	s/s_10	s/s_10_17
s/s	33	10	18	s/s_10	s/s_10_18
s/s	36	10	19	s/s_10	s/s_10_19
s/s	31	10	20	s/s_10	s/s_10_20
s/s	40	11	1	s/s_11	s/s_11_1
s/s	38	11	2	s/s_11	s/s_11_2
s/s	42	11	3	s/s_11	s/s_11_3
s/s	40	11	4	s/s_11	s/s_11_4
s/s	34	11	5	s/s_11	s/s_11_5
s/s	36	11	6	s/s_11	s/s_11_6
s/s	54	11	7	s/s_11	s/s_11_7
s/s	34	11	8	s/s_11	s/s_11_8
s/s	48	11	9	s/s_11	s/s_11_9
s/s	62	11	10	s/s_11	s/s_11_10
s/s	57	11	11	s/s_11	s/s_11_11
s/s	57	11	12	s/s_11	s/s_11_12
s/s	29	11	13	s/s_11	s/s_11_13
s/s	41	11	14	s/s_11	s/s_11_14
s/s	47	11	15	s/s_11	s/s_11_15
s/s	41	11	16	s/s_11	s/s_11_16
s/s	44	11	17	s/s_11	s/s_11_17
s/s	37	11	18	s/s_11	s/s_11_18
s/s	38	11	19	s/s_11	s/s_11_19
s/s	46	11	20	s/s_11	s/s_11_20
s/s	44	12	1	s/s_12	s/s_12_1
s/s	33	12	2	s/s_12	s/s_12_2
s/s	31	12	3	s/s_12	s/s_12_3
s/s	39	12	4	s/s_12	s/s_12_4
s/s	40	12	5	s/s_12	s/s_12_5
s/s	41	12	6	s/s_12	s/s_12_6
s/s	49	12	7	s/s_12	s/s_12_7
s/s	41	12	8	s/s_12	s/s_12_8
s/s	30	12	9	s/s_12	s/s_12_9
s/s	39	12	10	s/s_12	s/s_12_10
s/s	32	12	11	s/s_12	s/s_12_11
s/s	26	12	12	s/s_12	s/s_12_12
s/s	46	12	13	s/s_12	s/s_12_13
s/s	35	12	14	s/s_12	s/s_12_14
s/s	26	12	15	s/s_12	s/s_12_15
s/s	37	12	16	s/s_12	s/s_12_16
s/s	35	12	17	s/s_12	s/s_12_17
s/s	34	12	18	s/s_12	s/s_12_18
s/s	35	12	19	s/s_12	s/s_12_19
s/s	35	12	20	s/s_12	s/s_12_20
s/s	45	13	1	s/s_13	s/s_13_1
s/s	59	13	2	s/s_13	s/s_13_2
s/s	49	13	3	s/s_13	s/s_13_3
s/s	51	13	4	s/s_13	s/s_13_4
s/s	54	13	5	s/s_13	s/s_13_5
s/s	43	13	6	s/s_13	s/s_13_6
s/s	51	13	7	s/s_13	s/s_13_7
s/s	59	13	8	s/s_13	s/s_13_8
s/s	49	13	9	s/s_13	s/s_13_9
s/s	59	13	10	s/s_13	s/s_13_10
s/s	59	13	11	s/s_13	s/s_13_11
s/s	43	13	12	s/s_13	s/s_13_12
s/s	52	13	13	s/s_13	s/s_13_13
s/s	49	13	14	s/s_13	s/s_13_14
s/s	45	13	15	s/s_13	s/s_13_15
s/s	55	13	16	s/s_13	s/s_13_16
s/s	57	13	17	s/s_13	s/s_13_17
s/s	46	13	18	s/s_13	s/s_13_18
s/s	58	13	19	s/s_13	s/s_13_19
s/s	38	13	20	s/s_13	s/s_13_20
s/s	51	14	1	s/s_14	s/s_14_1
s/s	43	14	2	s/s_14	s/s_14_2
s/s	50	14	3	s/s_14	s/s_14_3
s/s	50	14	4	s/s_14	s/s_14_4
s/s	54	14	5	s/s_14	s/s_14_5
s/s	61	14	6	s/s_14	s/s_14_6
s/s	54	14	7	s/s_14	s/s_14_7
s/s	40	14	8	s/s_14	s/s_14_8
s/s	40	14	9	s/s_14	s/s_14_9
s/s	40	14	10	s/s_14	s/s_14_10
s/s	45	14	11	s/s_14	s/s_14_11
s/s	34	14	12	s/s_14	s/s_14_12
s/s	59	14	13	s/s_14	s/s_14_13
s/s	48	14	14	s/s_14	s/s_14_14
s/s	50	14	15	s/s_14	s/s_14_15
s/s	57	14	16	s/s_14	s/s_14_16
s/s	53	14	17	s/s_14	s/s_14_17
s/s	37	14	18	s/s_14	s/s_14_18
s/s	51	14	19	s/s_14	s/s_14_19
s/s	70	14	20	s/s_14	s/s_14_20
s/s	29	15	1	s/s_15	s/s_15_1
s/s	29	15	2	s/s_15	s/s_15_2
s/s	28	15	3	s/s_15	s/s_15_3
s/s	36	15	4	s/s_15	s/s_15_4
s/s	39	15	5	s/s_15	s/s_15_5
s/s	38	15	6	s/s_15	s/s_15_6
s/s	40	15	7	s/s_15	s/s_15_7
s/s	38	15	8	s/s_15	s/s_15_8
s/s	31	15	9	s/s_15	s/s_15_9
s/s	38	15	10	s/s_15	s/s_15_10
s/s	33	15	11	s/s_15	s/s_15_11
s/s	39	15	12	s/s_15	s/s_15_12
s/s	32	15	13	s/s_15	s/s_15_13
s/s	36	15	14	s/s_15	s/s_15_14
s/s	45	15	15	s/s_15	s/s_15_15
s/s	36	15	16	s/s_15	s/s_15_16
s/s	38	15	17	s/s_15	s/s_15_17
s/s	31	15	18	s/s_15	s/s_15_18
s/s	34	15	19	s/s_15	s/s_15_19
s/s	39	15	20	s/s_15	s/s_15_20
s+/Df(1)Exel6245	44	1	1	s+/Df(1)Exel6245_1	s+/Df(1)Exel6245_1_1
s+/Df(1)Exel6245	56	1	2	s+/Df(1)Exel6245_1	s+/Df(1)Exel6245_1_2
s+/Df(1)Exel6245	50	1	3	s+/Df(1)Exel6245_1	s+/Df(1)Exel6245_1_3
s+/Df(1)Exel6245	53	1	4	s+/Df(1)Exel6245_1	s+/Df(1)Exel6245_1_4
s+/Df(1)Exel6245	63	1	5	s+/Df(1)Exel6245_1	s+/Df(1)Exel6245_1_5
s+/Df(1)Exel6245	52	1	6	s+/Df(1)Exel6245_1	s+/Df(1)Exel6245_1_6
s+/Df(1)Exel6245	51	1	7	s+/Df(1)Exel6245_1	s+/Df(1)Exel6245_1_7
s+/Df(1)Exel6245	51	1	8	s+/Df(1)Exel6245_1	s+/Df(1)Exel6245_1_8
s+/Df(1)Exel6245	40	1	9	s+/Df(1)Exel6245_1	s+/Df(1)Exel6245_1_9
s+/Df(1)Exel6245	41	1	10	s+/Df(1)Exel6245_1	s+/Df(1)Exel6245_1_10
s+/Df(1)Exel6245	50	1	11	s+/Df(1)Exel6245_1	s+/Df(1)Exel6245_1_11
s+/Df(1)Exel6245	47	1	12	s+/Df(1)Exel6245_1	s+/Df(1)Exel6245_1_12
s+/Df(1)Exel6245	50	1	13	s+/Df(1)Exel6245_1	s+/Df(1)Exel6245_1_13
s+/Df(1)Exel6245	45	1	14	s+/Df(1)Exel6245_1	s+/Df(1)Exel6245_1_14
s+/Df(1)Exel6245	56	1	15	s+/Df(1)Exel6245_1	s+/Df(1)Exel6245_1_15
s+/Df(1)Exel6245	70	1	16	s+/Df(1)Exel6245_1	s+/Df(1)Exel6245_1_16
s+/Df(1)Exel6245	63	1	17	s+/Df(1)Exel6245_1	s+/Df(1)Exel6245_1_17
s+/Df(1)Exel6245	57	1	18	s+/Df(1)Exel6245_1	s+/Df(1)Exel6245_1_18
s+/Df(1)Exel6245	42	1	19	s+/Df(1)Exel6245_1	s+/Df(1)Exel6245_1_19
s+/Df(1)Exel6245	52	1	20	s+/Df(1)Exel6245_1	s+/Df(1)Exel6245_1_20
s+/Df(1)Exel6245	66	2	1	s+/Df(1)Exel6245_2	s+/Df(1)Exel6245_2_1
s+/Df(1)Exel6245	76	2	2	s+/Df(1)Exel6245_2	s+/Df(1)Exel6245_2_2
s+/Df(1)Exel6245	66	2	3	s+/Df(1)Exel6245_2	s+/Df(1)Exel6245_2_3
s+/Df(1)Exel6245	70	2	4	s+/Df(1)Exel6245_2	s+/Df(1)Exel6245_2_4
s+/Df(1)Exel6245	55	2	5	s+/Df(1)Exel6245_2	s+/Df(1)Exel6245_2_5
s+/Df(1)Exel6245	64	2	6	s+/Df(1)Exel6245_2	s+/Df(1)Exel6245_2_6
s+/Df(1)Exel6245	42	2	7	s+/Df(1)Exel6245_2	s+/Df(1)Exel6245_2_7
s+/Df(1)Exel6245	53	2	8	s+/Df(1)Exel6245_2	s+/Df(1)Exel6245_2_8
s+/Df(1)Exel6245	52	2	9	s+/Df(1)Exel6245_2	s+/Df(1)Exel6245_2_9
s+/Df(1)Exel6245	52	2	10	s+/Df(1)Exel6245_2	s+/Df(1)Exel6245_2_10
s+/Df(1)Exel6245	56	2	11	s+/Df(1)Exel6245_2	s+/Df(1)Exel6245_2_11
s+/Df(1)Exel6245	54	2	12	s+/Df(1)Exel6245_2	s+/Df(1)Exel6245_2_12
s+/Df(1)Exel6245	51	2	13	s+/Df(1)Exel6245_2	s+/Df(1)Exel6245_2_13
s+/Df(1)Exel6245	51	2	14	s+/Df(1)Exel6245_2	s+/Df(1)Exel6245_2_14
s+/Df(1)Exel6245	64	2	15	s+/Df(1)Exel6245_2	s+/Df(1)Exel6245_2_15
s+/Df(1)Exel6245	59	2	16	s+/Df(1)Exel6245_2	s+/Df(1)Exel6245_2_16
s+/Df(1)Exel6245	58	2	17	s+/Df(1)Exel6245_2	s+/Df(1)Exel6245_2_17
s+/Df(1)Exel6245	59	2	18	s+/Df(1)Exel6245_2	s+/Df(1)Exel6245_2_18
s+/Df(1)Exel6245	65	2	19	s+/Df(1)Exel6245_2	s+/Df(1)Exel6245_2_19
s+/Df(1)Exel6245	66	2	20	s+/Df(1)Exel6245_2	s+/Df(1)Exel6245_2_20
s+/Df(1)Exel6245	58	3	1	s+/Df(1)Exel6245_3	s+/Df(1)Exel6245_3_1
s+/Df(1)Exel6245	53	3	2	s+/Df(1)Exel6245_3	s+/Df(1)Exel6245_3_2
s+/Df(1)Exel6245	65	3	3	s+/Df(1)Exel6245_3	s+/Df(1)Exel6245_3_3
s+/Df(1)Exel6245	51	3	4	s+/Df(1)Exel6245_3	s+/Df(1)Exel6245_3_4
s+/Df(1)Exel6245	57	3	5	s+/Df(1)Exel6245_3	s+/Df(1)Exel6245_3_5
s+/Df(1)Exel6245	57	3	6	s+/Df(1)Exel6245_3	s+/Df(1)Exel6245_3_6
s+/Df(1)Exel6245	52	3	7	s+/Df(1)Exel6245_3	s+/Df(1)Exel6245_3_7
s+/Df(1)Exel6245	56	3	8	s+/Df(1)Exel6245_3	s+/Df(1)Exel6245_3_8
s+/Df(1)Exel6245	56	3	9	s+/Df(1)Exel6245_3	s+/Df(1)Exel6245_3_9
s+/Df(1)Exel6245	50	3	10	s+/Df(1)Exel6245_3	s+/Df(1)Exel6245_3_10
s+/Df(1)Exel6245	44	3	11	s+/Df(1)Exel6245_3	s+/Df(1)Exel6245_3_11
s+/Df(1)Exel6245	49	3	12	s+/Df(1)Exel6245_3	s+/Df(1)Exel6245_3_12
s+/Df(1)Exel6245	49	3	13	s+/Df(1)Exel6245_3	s+/Df(1)Exel6245_3_13
s+/Df(1)Exel6245	57	3	14	s+/Df(1)Exel6245_3	s+/Df(1)Exel6245_3_14
s+/Df(1)Exel6245	55	3	15	s+/Df(1)Exel6245_3	s+/Df(1)Exel6245_3_15
s+/Df(1)Exel6245	47	3	16	s+/Df(1)Exel6245_3	s+/Df(1)Exel6245_3_16
s+/Df(1)Exel6245	52	3	17	s+/Df(1)Exel6245_3	s+/Df(1)Exel6245_3_17
s+/Df(1)Exel6245	60	3	18	s+/Df(1)Exel6245_3	s+/Df(1)Exel6245_3_18
s+/Df(1)Exel6245	57	3	19	s+/Df(1)Exel6245_3	s+/Df(1)Exel6245_3_19
s+/Df(1)Exel6245	65	3	20	s+/Df(1)Exel6245_3	s+/Df(1)Exel6245_3_20
s+/Df(1)Exel6245	56	4	1	s+/Df(1)Exel6245_4	s+/Df(1)Exel6245_4_1
s+/Df(1)Exel6245	66	4	2	s+/Df(1)Exel6245_4	s+/Df(1)Exel6245_4_2
s+/Df(1)Exel6245	59	4	3	s+/Df(1)Exel6245_4	s+/Df(1)Exel6245_4_3
s+/Df(1)Exel6245	72	4	4	s+/Df(1)Exel6245_4	s+/Df(1)Exel6245_4_4
s+/Df(1)Exel6245	65	4	5	s+/Df(1)Exel6245_4	s+/Df(1)Exel6245_4_5
s+/Df(1)Exel6245	74	4	6	s+/Df(1)Exel6245_4	s+/Df(1)Exel6245_4_6
s+/Df(1)Exel6245	73	4	7	s+/Df(1)Exel6245_4	s+/Df(1)Exel6245_4_7
s+/Df(1)Exel6245	61	4	8	s+/Df(1)Exel6245_4	s+/Df(1)Exel6245_4_8
s+/Df(1)Exel6245	62	4	9	s+/Df(1)Exel6245_4	s+/Df(1)Exel6245_4_9
s+/Df(1)Exel6245	61	4	10	s+/Df(1)Exel6245_4	s+/Df(1)Exel6245_4_10
s+/Df(1)Exel6245	52	4	11	s+/Df(1)Exel6245_4	s+/Df(1)Exel6245_4_11
s+/Df(1)Exel6245	47	4	12	s+/Df(1)Exel6245_4	s+/Df(1)Exel6245_4_12
s+/Df(1)Exel6245	58	4	13	s+/Df(1)Exel6245_4	s+/Df(1)Exel6245_4_13
s+/Df(1)Exel6245	60	4	14	s+/Df(1)Exel6245_4	s+/Df(1)Exel6245_4_14
s+/Df(1)Exel6245	64	4	15	s+/Df(1)Exel6245_4	s+/Df(1)Exel6245_4_15
s+/Df(1)Exel6245	55	4	16	s+/Df(1)Exel6245_4	s+/Df(1)Exel6245_4_16
s+/Df(1)Exel6245	60	4	17	s+/Df(1)Exel6245_4	s+/Df(1)Exel6245_4_17
s+/Df(1)Exel6245	58	4	18	s+/Df(1)Exel6245_4	s+/Df(1)Exel6245_4_18
s+/Df(1)Exel6245	56	4	19	s+/Df(1)Exel6245_4	s+/Df(1)Exel6245_4_19
s+/Df(1)Exel6245	71	4	20	s+/Df(1)Exel6245_4	s+/Df(1)Exel6245_4_20
s+/Df(1)Exel6245	46	5	1	s+/Df(1)Exel6245_5	s+/Df(1)Exel6245_5_1
s+/Df(1)Exel6245	51	5	2	s+/Df(1)Exel6245_5	s+/Df(1)Exel6245_5_2
s+/Df(1)Exel6245	57	5	3	s+/Df(1)Exel6245_5	s+/Df(1)Exel6245_5_3
s+/Df(1)Exel6245	48	5	4	s+/Df(1)Exel6245_5	s+/Df(1)Exel6245_5_4
s+/Df(1)Exel6245	70	5	5	s+/Df(1)Exel6245_5	s+/Df(1)Exel6245_5_5
s+/Df(1)Exel6245	59	5	6	s+/Df(1)Exel6245_5	s+/Df(1)Exel6245_5_6
s+/Df(1)Exel6245	53	5	7	s+/Df(1)Exel6245_5	s+/Df(1)Exel6245_5_7
s+/Df(1)Exel6245	60	5	8	s+/Df(1)Exel6245_5	s+/Df(1)Exel6245_5_8
s+/Df(1)Exel6245	49	5	9	s+/Df(1)Exel6245_5	s+/Df(1)Exel6245_5_9
s+/Df(1)Exel6245	50	5	10	s+/Df(1)Exel6245_5	s+/Df(1)Exel6245_5_10
s+/Df(1)Exel6245	42	5	11	s+/Df(1)Exel6245_5	s+/Df(1)Exel6245_5_11
s+/Df(1)Exel6245	41	5	12	s+/Df(1)Exel6245_5	s+/Df(1)Exel6245_5_12
s+/Df(1)Exel6245	40	5	13	s+/Df(1)Exel6245_5	s+/Df(1)Exel6245_5_13
s+/Df(1)Exel6245	57	5	14	s+/Df(1)Exel6245_5	s+/Df(1)Exel6245_5_14
s+/Df(1)Exel6245	44	5	15	s+/Df(1)Exel6245_5	s+/Df(1)Exel6245_5_15
s+/Df(1)Exel6245	45	5	16	s+/Df(1)Exel6245_5	s+/Df(1)Exel6245_5_16
s+/Df(1)Exel6245	48	5	17	s+/Df(1)Exel6245_5	s+/Df(1)Exel6245_5_17
s+/Df(1)Exel6245	48	5	18	s+/Df(1)Exel6245_5	s+/Df(1)Exel6245_5_18
s+/Df(1)Exel6245	58	5	19	s+/Df(1)Exel6245_5	s+/Df(1)Exel6245_5_19
s+/Df(1)Exel6245	45	5	20	s+/Df(1)Exel6245_5	s+/Df(1)Exel6245_5_20
s+/Df(1)Exel6245	59	6	1	s+/Df(1)Exel6245_6	s+/Df(1)Exel6245_6_1
s+/Df(1)Exel6245	74	6	2	s+/Df(1)Exel6245_6	s+/Df(1)Exel6245_6_2
s+/Df(1)Exel6245	73	6	3	s+/Df(1)Exel6245_6	s+/Df(1)Exel6245_6_3
s+/Df(1)Exel6245	74	6	4	s+/Df(1)Exel6245_6	s+/Df(1)Exel6245_6_4
s+/Df(1)Exel6245	77	6	5	s+/Df(1)Exel6245_6	s+/Df(1)Exel6245_6_5
s+/Df(1)Exel6245	63	6	6	s+/Df(1)Exel6245_6	s+/Df(1)Exel6245_6_6
s+/Df(1)Exel6245	76	6	7	s+/Df(1)Exel6245_6	s+/Df(1)Exel6245_6_7
s+/Df(1)Exel6245	58	6	8	s+/Df(1)Exel6245_6	s+/Df(1)Exel6245_6_8
s+/Df(1)Exel6245	51	6	9	s+/Df(1)Exel6245_6	s+/Df(1)Exel6245_6_9
s+/Df(1)Exel6245	51	6	10	s+/Df(1)Exel6245_6	s+/Df(1)Exel6245_6_10
s+/Df(1)Exel6245	58	6	11	s+/Df(1)Exel6245_6	s+/Df(1)Exel6245_6_11
s+/Df(1)Exel6245	58	6	12	s+/Df(1)Exel6245_6	s+/Df(1)Exel6245_6_12
s+/Df(1)Exel6245	45	6	13	s+/Df(1)Exel6245_6	s+/Df(1)Exel6245_6_13
s+/Df(1)Exel6245	50	6	14	s+/Df(1)Exel6245_6	s+/Df(1)Exel6245_6_14
s+/Df(1)Exel6245	54	6	15	s+/Df(1)Exel6245_6	s+/Df(1)Exel6245_6_15
s+/Df(1)Exel6245	52	6	16	s+/Df(1)Exel6245_6	s+/Df(1)Exel6245_6_16
s+/Df(1)Exel6245	67	6	17	s+/Df(1)Exel6245_6	s+/Df(1)Exel6245_6_17
s+/Df(1)Exel6245	73	6	18	s+/Df(1)Exel6245_6	s+/Df(1)Exel6245_6_18
s+/Df(1)Exel6245	64	6	19	s+/Df(1)Exel6245_6	s+/Df(1)Exel6245_6_19
s+/Df(1)Exel6245	63	6	20	s+/Df(1)Exel6245_6	s+/Df(1)Exel6245_6_20
s+/Df(1)Exel6245	57	7	1	s+/Df(1)Exel6245_7	s+/Df(1)Exel6245_7_1
s+/Df(1)Exel6245	44	7	2	s+/Df(1)Exel6245_7	s+/Df(1)Exel6245_7_2
s+/Df(1)Exel6245	49	7	3	s+/Df(1)Exel6245_7	s+/Df(1)Exel6245_7_3
s+/Df(1)Exel6245	49	7	4	s+/Df(1)Exel6245_7	s+/Df(1)Exel6245_7_4
s+/Df(1)Exel6245	67	7	5	s+/Df(1)Exel6245_7	s+/Df(1)Exel6245_7_5
s+/Df(1)Exel6245	72	7	6	s+/Df(1)Exel6245_7	s+/Df(1)Exel6245_7_6
s+/Df(1)Exel6245	72	7	7	s+/Df(1)Exel6245_7	s+/Df(1)Exel6245_7_7
s+/Df(1)Exel6245	75	7	8	s+/Df(1)Exel6245_7	s+/Df(1)Exel6245_7_8
s+/Df(1)Exel6245	28	7	9	s+/Df(1)Exel6245_7	s+/Df(1)Exel6245_7_9
s+/Df(1)Exel6245	33	7	10	s+/Df(1)Exel6245_7	s+/Df(1)Exel6245_7_10
s+/Df(1)Exel6245	36	7	11	s+/Df(1)Exel6245_7	s+/Df(1)Exel6245_7_11
s+/Df(1)Exel6245	38	7	12	s+/Df(1)Exel6245_7	s+/Df(1)Exel6245_7_12
s+/Df(1)Exel6245	39	7	13	s+/Df(1)Exel6245_7	s+/Df(1)Exel6245_7_13
s+/Df(1)Exel6245	47	7	14	s+/Df(1)Exel6245_7	s+/Df(1)Exel6245_7_14
s+/Df(1)Exel6245	44	7	15	s+/Df(1)Exel6245_7	s+/Df(1)Exel6245_7_15
s+/Df(1)Exel6245	44	7	16	s+/Df(1)Exel6245_7	s+/Df(1)Exel6245_7_16
s+/Df(1)Exel6245	44	7	17	s+/Df(1)Exel6245_7	s+/Df(1)Exel6245_7_17
s+/Df(1)Exel6245	42	7	18	s+/Df(1)Exel6245_7	s+/Df(1)Exel6245_7_18
s+/Df(1)Exel6245	33	7	19	s+/Df(1)Exel6245_7	s+/Df(1)Exel6245_7_19
s+/Df(1)Exel6245	46	7	20	s+/Df(1)Exel6245_7	s+/Df(1)Exel6245_7_20
s+/Df(1)Exel6245	53	8	1	s+/Df(1)Exel6245_8	s+/Df(1)Exel6245_8_1
s+/Df(1)Exel6245	44	8	2	s+/Df(1)Exel6245_8	s+/Df(1)Exel6245_8_2
s+/Df(1)Exel6245	48	8	3	s+/Df(1)Exel6245_8	s+/Df(1)Exel6245_8_3
s+/Df(1)Exel6245	47	8	4	s+/Df(1)Exel6245_8	s+/Df(1)Exel6245_8_4
s+/Df(1)Exel6245	65	8	5	s+/Df(1)Exel6245_8	s+/Df(1)Exel6245_8_5
s+/Df(1)Exel6245	76	8	6	s+/Df(1)Exel6245_8	s+/Df(1)Exel6245_8_6
s+/Df(1)Exel6245	74	8	7	s+/Df(1)Exel6245_8	s+/Df(1)Exel6245_8_7
s+/Df(1)Exel6245	49	8	8	s+/Df(1)Exel6245_8	s+/Df(1)Exel6245_8_8
s+/Df(1)Exel6245	57	8	9	s+/Df(1)Exel6245_8	s+/Df(1)Exel6245_8_9
s+/Df(1)Exel6245	37	8	10	s+/Df(1)Exel6245_8	s+/Df(1)Exel6245_8_10
s+/Df(1)Exel6245	37	8	11	s+/Df(1)Exel6245_8	s+/Df(1)Exel6245_8_11
s+/Df(1)Exel6245	38	8	12	s+/Df(1)Exel6245_8	s+/Df(1)Exel6245_8_12
s+/Df(1)Exel6245	39	8	13	s+/Df(1)Exel6245_8	s+/Df(1)Exel6245_8_13
s+/Df(1)Exel6245	35	8	14	s+/Df(1)Exel6245_8	s+/Df(1)Exel6245_8_14
s+/Df(1)Exel6245	56	8	15	s+/Df(1)Exel6245_8	s+/Df(1)Exel6245_8_15
s+/Df(1)Exel6245	63	8	16	s+/Df(1)Exel6245_8	s+/Df(1)Exel6245_8_16
s+/Df(1)Exel6245	77	8	17	s+/Df(1)Exel6245_8	s+/Df(1)Exel6245_8_17
s+/Df(1)Exel6245	41	8	18	s+/Df(1)Exel6245_8	s+/Df(1)Exel6245_8_18
s+/Df(1)Exel6245	48	8	19	s+/Df(1)Exel6245_8	s+/Df(1)Exel6245_8_19
s+/Df(1)Exel6245	57	8	20	s+/Df(1)Exel6245_8	s+/Df(1)Exel6245_8_20
s+/Df(1)Exel6245	52	9	1	s+/Df(1)Exel6245_9	s+/Df(1)Exel6245_9_1
s+/Df(1)Exel6245	55	9	2	s+/Df(1)Exel6245_9	s+/Df(1)Exel6245_9_2
s+/Df(1)Exel6245	56	9	3	s+/Df(1)Exel6245_9	s+/Df(1)Exel6245_9_3
s+/Df(1)Exel6245	57	9	4	s+/Df(1)Exel6245_9	s+/Df(1)Exel6245_9_4
s+/Df(1)Exel6245	71	9	5	s+/Df(1)Exel6245_9	s+/Df(1)Exel6245_9_5
s+/Df(1)Exel6245	75	9	6	s+/Df(1)Exel6245_9	s+/Df(1)Exel6245_9_6
s+/Df(1)Exel6245	54	9	7	s+/Df(1)Exel6245_9	s+/Df(1)Exel6245_9_7
s+/Df(1)Exel6245	53	9	8	s+/Df(1)Exel6245_9	s+/Df(1)Exel6245_9_8
s+/Df(1)Exel6245	58	9	9	s+/Df(1)Exel6245_9	s+/Df(1)Exel6245_9_9
s+/Df(1)Exel6245	50	9	10	s+/Df(1)Exel6245_9	s+/Df(1)Exel6245_9_10
s+/Df(1)Exel6245	35	9	11	s+/Df(1)Exel6245_9	s+/Df(1)Exel6245_9_11
s+/Df(1)Exel6245	50	9	12	s+/Df(1)Exel6245_9	s+/Df(1)Exel6245_9_12
s+/Df(1)Exel6245	53	9	13	s+/Df(1)Exel6245_9	s+/Df(1)Exel6245_9_13
s+/Df(1)Exel6245	51	9	14	s+/Df(1)Exel6245_9	s+/Df(1)Exel6245_9_14
s+/Df(1)Exel6245	46	9	15	s+/Df(1)Exel6245_9	s+/Df(1)Exel6245_9_15
s+/Df(1)Exel6245	58	9	16	s+/Df(1)Exel6245_9	s+/Df(1)Exel6245_9_16
s+/Df(1)Exel6245	62	9	17	s+/Df(1)Exel6245_9	s+/Df(1)Exel6245_9_17
s+/Df(1)Exel6245	54	9	18	s+/Df(1)Exel6245_9	s+/Df(1)Exel6245_9_18
s+/Df(1)Exel6245	54	9	19	s+/Df(1)Exel6245_9	s+/Df(1)Exel6245_9_19
s+/Df(1)Exel6245	53	9	20	s+/Df(1)Exel6245_9	s+/Df(1)Exel6245_9_20
s+/Df(1)Exel6245	57	10	1	s+/Df(1)Exel6245_10	s+/Df(1)Exel6245_10_1
s+/Df(1)Exel6245	55	10	2	s+/Df(1)Exel6245_10	s+/Df(1)Exel6245_10_2
s+/Df(1)Exel6245	53	10	3	s+/Df(1)Exel6245_10	s+/Df(1)Exel6245_10_3
s+/Df(1)Exel6245	65	10	4	s+/Df(1)Exel6245_10	s+/Df(1)Exel6245_10_4
s+/Df(1)Exel6245	72	10	5	s+/Df(1)Exel6245_10	s+/Df(1)Exel6245_10_5
s+/Df(1)Exel6245	53	10	6	s+/Df(1)Exel6245_10	s+/Df(1)Exel6245_10_6
s+/Df(1)Exel6245	48	10	7	s+/Df(1)Exel6245_10	s+/Df(1)Exel6245_10_7
s+/Df(1)Exel6245	34	10	8	s+/Df(1)Exel6245_10	s+/Df(1)Exel6245_10_8
s+/Df(1)Exel6245	32	10	9	s+/Df(1)Exel6245_10	s+/Df(1)Exel6245_10_9
s+/Df(1)Exel6245	30	10	10	s+/Df(1)Exel6245_10	s+/Df(1)Exel6245_10_10
s+/Df(1)Exel6245	43	10	11	s+/Df(1)Exel6245_10	s+/Df(1)Exel6245_10_11
s+/Df(1)Exel6245	44	10	12	s+/Df(1)Exel6245_10	s+/Df(1)Exel6245_10_12
s+/Df(1)Exel6245	47	10	13	s+/Df(1)Exel6245_10	s+/Df(1)Exel6245_10_13
s+/Df(1)Exel6245	54	10	14	s+/Df(1)Exel6245_10	s+/Df(1)Exel6245_10_14
s+/Df(1)Exel6245	64	10	15	s+/Df(1)Exel6245_10	s+/Df(1)Exel6245_10_15
s+/Df(1)Exel6245	60	10	16	s+/Df(1)Exel6245_10	s+/Df(1)Exel6245_10_16
s+/Df(1)Exel6245	70	10	17	s+/Df(1)Exel6245_10	s+/Df(1)Exel6245_10_17
s+/Df(1)Exel6245	39	10	18	s+/Df(1)Exel6245_10	s+/Df(1)Exel6245_10_18
s+/Df(1)Exel6245	47	10	19	s+/Df(1)Exel6245_10	s+/Df(1)Exel6245_10_19
s+/Df(1)Exel6245	57	10	20	s+/Df(1)Exel6245_10	s+/Df(1)Exel6245_10_20
s+/Df(1)Exel6245	67	11	1	s+/Df(1)Exel6245_11	s+/Df(1)Exel6245_11_1
s+/Df(1)Exel6245	68	11	2	s+/Df(1)Exel6245_11	s+/Df(1)Exel6245_11_2
s+/Df(1)Exel6245	72	11	3	s+/Df(1)Exel6245_11	s+/Df(1)Exel6245_11_3
s+/Df(1)Exel6245	72	11	4	s+/Df(1)Exel6245_11	s+/Df(1)Exel6245_11_4
s+/Df(1)Exel6245	71	11	5	s+/Df(1)Exel6245_11	s+/Df(1)Exel6245_11_5
s+/Df(1)Exel6245	55	11	6	s+/Df(1)Exel6245_11	s+/Df(1)Exel6245_11_6
s+/Df(1)Exel6245	66	11	7	s+/Df(1)Exel6245_11	s+/Df(1)Exel6245_11_7
s+/Df(1)Exel6245	57	11	8	s+/Df(1)Exel6245_11	s+/Df(1)Exel6245_11_8
s+/Df(1)Exel6245	54	11	9	s+/Df(1)Exel6245_11	s+/Df(1)Exel6245_11_9
s+/Df(1)Exel6245	49	11	10	s+/Df(1)Exel6245_11	s+/Df(1)Exel6245_11_10
s+/Df(1)Exel6245	45	11	11	s+/Df(1)Exel6245_11	s+/Df(1)Exel6245_11_11
s+/Df(1)Exel6245	58	11	12	s+/Df(1)Exel6245_11	s+/Df(1)Exel6245_11_12
s+/Df(1)Exel6245	43	11	13	s+/Df(1)Exel6245_11	s+/Df(1)Exel6245_11_13
s+/Df(1)Exel6245	56	11	14	s+/Df(1)Exel6245_11	s+/Df(1)Exel6245_11_14
s+/Df(1)Exel6245	59	11	15	s+/Df(1)Exel6245_11	s+/Df(1)Exel6245_11_15
s+/Df(1)Exel6245	65	11	16	s+/Df(1)Exel6245_11	s+/Df(1)Exel6245_11_16
s+/Df(1)Exel6245	56	11	17	s+/Df(1)Exel6245_11	s+/Df(1)Exel6245_11_17
s+/Df(1)Exel6245	55	11	18	s+/Df(1)Exel6245_11	s+/Df(1)Exel6245_11_18
s+/Df(1)Exel6245	58	11	19	s+/Df(1)Exel6245_11	s+/Df(1)Exel6245_11_19
s+/Df(1)Exel6245	53	11	20	s+/Df(1)Exel6245_11	s+/Df(1)Exel6245_11_20
s+/Df(1)Exel6245	51	12	1	s+/Df(1)Exel6245_12	s+/Df(1)Exel6245_12_1
s+/Df(1)Exel6245	48	12	2	s+/Df(1)Exel6245_12	s+/Df(1)Exel6245_12_2
s+/Df(1)Exel6245	59	12	3	s+/Df(1)Exel6245_12	s+/Df(1)Exel6245_12_3
s+/Df(1)Exel6245	60	12	4	s+/Df(1)Exel6245_12	s+/Df(1)Exel6245_12_4
s+/Df(1)Exel6245	53	12	5	s+/Df(1)Exel6245_12	s+/Df(1)Exel6245_12_5
s+/Df(1)Exel6245	62	12	6	s+/Df(1)Exel6245_12	s+/Df(1)Exel6245_12_6
s+/Df(1)Exel6245	68	12	7	s+/Df(1)Exel6245_12	s+/Df(1)Exel6245_12_7
s+/Df(1)Exel6245	40	12	8	s+/Df(1)Exel6245_12	s+/Df(1)Exel6245_12_8
s+/Df(1)Exel6245	39	12	9	s+/Df(1)Exel6245_12	s+/Df(1)Exel6245_12_9
s+/Df(1)Exel6245	42	12	10	s+/Df(1)Exel6245_12	s+/Df(1)Exel6245_12_10
s+/Df(1)Exel6245	40	12	11	s+/Df(1)Exel6245_12	s+/Df(1)Exel6245_12_11
s+/Df(1)Exel6245	42	12	12	s+/Df(1)Exel6245_12	s+/Df(1)Exel6245_12_12
s+/Df(1)Exel6245	52	12	13	s+/Df(1)Exel6245_12	s+/Df(1)Exel6245_12_13
s+/Df(1)Exel6245	66	12	14	s+/Df(1)Exel6245_12	s+/Df(1)Exel6245_12_14
s+/Df(1)Exel6245	46	12	15	s+/Df(1)Exel6245_12	s+/Df(1)Exel6245_12_15
s+/Df(1)Exel6245	57	12	16	s+/Df(1)Exel6245_12	s+/Df(1)Exel6245_12_16
s+/Df(1)Exel6245	24	12	17	s+/Df(1)Exel6245_12	s+/Df(1)Exel6245_12_17
s+/Df(1)Exel6245	42	12	18	s+/Df(1)Exel6245_12	s+/Df(1)Exel6245_12_18
s+/Df(1)Exel6245	43	12	19	s+/Df(1)Exel6245_12	s+/Df(1)Exel6245_12_19
s+/Df(1)Exel6245	47	12	20	s+/Df(1)Exel6245_12	s+/Df(1)Exel6245_12_20
s+/Df(1)Exel6245	55	13	1	s+/Df(1)Exel6245_13	s+/Df(1)Exel6245_13_1
s+/Df(1)Exel6245	66	13	2	s+/Df(1)Exel6245_13	s+/Df(1)Exel6245_13_2
s+/Df(1)Exel6245	51	13	3	s+/Df(1)Exel6245_13	s+/Df(1)Exel6245_13_3
s+/Df(1)Exel6245	66	13	4	s+/Df(1)Exel6245_13	s+/Df(1)Exel6245_13_4
s+/Df(1)Exel6245	71	13	5	s+/Df(1)Exel6245_13	s+/Df(1)Exel6245_13_5
s+/Df(1)Exel6245	61	13	6	s+/Df(1)Exel6245_13	s+/Df(1)Exel6245_13_6
s+/Df(1)Exel6245	70	13	7	s+/Df(1)Exel6245_13	s+/Df(1)Exel6245_13_7
s+/Df(1)Exel6245	64	13	8	s+/Df(1)Exel6245_13	s+/Df(1)Exel6245_13_8
s+/Df(1)Exel6245	64	13	9	s+/Df(1)Exel6245_13	s+/Df(1)Exel6245_13_9
s+/Df(1)Exel6245	56	13	10	s+/Df(1)Exel6245_13	s+/Df(1)Exel6245_13_10
s+/Df(1)Exel6245	49	13	11	s+/Df(1)Exel6245_13	s+/Df(1)Exel6245_13_11
s+/Df(1)Exel6245	52	13	12	s+/Df(1)Exel6245_13	s+/Df(1)Exel6245_13_12
s+/Df(1)Exel6245	44	13	13	s+/Df(1)Exel6245_13	s+/Df(1)Exel6245_13_13
s+/Df(1)Exel6245	55	13	14	s+/Df(1)Exel6245_13	s+/Df(1)Exel6245_13_14
s+/Df(1)Exel6245	67	13	15	s+/Df(1)Exel6245_13	s+/Df(1)Exel6245_13_15
s+/Df(1)Exel6245	55	13	16	s+/Df(1)Exel6245_13	s+/Df(1)Exel6245_13_16
s+/Df(1)Exel6245	51	13	17	s+/Df(1)Exel6245_13	s+/Df(1)Exel6245_13_17
s+/Df(1)Exel6245	66	13	18	s+/Df(1)Exel6245_13	s+/Df(1)Exel6245_13_18
s+/Df(1)Exel6245	67	13	19	s+/Df(1)Exel6245_13	s+/Df(1)Exel6245_13_19
s+/Df(1)Exel6245	59	13	20	s+/Df(1)Exel6245_13	s+/Df(1)Exel6245_13_20
s+/Df(1)Exel6245	62	14	1	s+/Df(1)Exel6245_14	s+/Df(1)Exel6245_14_1
s+/Df(1)Exel6245	61	14	2	s+/Df(1)Exel6245_14	s+/Df(1)Exel6245_14_2
s+/Df(1)Exel6245	54	14	3	s+/Df(1)Exel6245_14	s+/Df(1)Exel6245_14_3
s+/Df(1)Exel6245	51	14	4	s+/Df(1)Exel6245_14	s+/Df(1)Exel6245_14_4
s+/Df(1)Exel6245	64	14	5	s+/Df(1)Exel6245_14	s+/Df(1)Exel6245_14_5
s+/Df(1)Exel6245	72	14	6	s+/Df(1)Exel6245_14	s+/Df(1)Exel6245_14_6
s+/Df(1)Exel6245	49	14	7	s+/Df(1)Exel6245_14	s+/Df(1)Exel6245_14_7
s+/Df(1)Exel6245	60	14	8	s+/Df(1)Exel6245_14	s+/Df(1)Exel6245_14_8
s+/Df(1)Exel6245	43	14	9	s+/Df(1)Exel6245_14	s+/Df(1)Exel6245_14_9
s+/Df(1)Exel6245	37	14	10	s+/Df(1)Exel6245_14	s+/Df(1)Exel6245_14_10
s+/Df(1)Exel6245	34	14	11	s+/Df(1)Exel6245_14	s+/Df(1)Exel6245_14_11
s+/Df(1)Exel6245	38	14	12	s+/Df(1)Exel6245_14	s+/Df(1)Exel6245_14_12
s+/Df(1)Exel6245	40	14	13	s+/Df(1)Exel6245_14	s+/Df(1)Exel6245_14_13
s+/Df(1)Exel6245	49	14	14	s+/Df(1)Exel6245_14	s+/Df(1)Exel6245_14_14
s+/Df(1)Exel6245	54	14	15	s+/Df(1)Exel6245_14	s+/Df(1)Exel6245_14_15
s+/Df(1)Exel6245	66	14	16	s+/Df(1)Exel6245_14	s+/Df(1)Exel6245_14_16
s+/Df(1)Exel6245	54	14	17	s+/Df(1)Exel6245_14	s+/Df(1)Exel6245_14_17
s+/Df(1)Exel6245	69	14	18	s+/Df(1)Exel6245_14	s+/Df(1)Exel6245_14_18
s+/Df(1)Exel6245	75	14	19	s+/Df(1)Exel6245_14	s+/Df(1)Exel6245_14_19
s+/Df(1)Exel6245	74	14	20	s+/Df(1)Exel6245_14	s+/Df(1)Exel6245_14_20
s+/Df(1)Exel6245	44	15	1	s+/Df(1)Exel6245_15	s+/Df(1)Exel6245_15_1
s+/Df(1)Exel6245	45	15	2	s+/Df(1)Exel6245_15	s+/Df(1)Exel6245_15_2
s+/Df(1)Exel6245	54	15	3	s+/Df(1)Exel6245_15	s+/Df(1)Exel6245_15_3
s+/Df(1)Exel6245	57	15	4	s+/Df(1)Exel6245_15	s+/Df(1)Exel6245_15_4
s+/Df(1)Exel6245	68	15	5	s+/Df(1)Exel6245_15	s+/Df(1)Exel6245_15_5
s+/Df(1)Exel6245	61	15	6	s+/Df(1)Exel6245_15	s+/Df(1)Exel6245_15_6
s+/Df(1)Exel6245	61	15	7	s+/Df(1)Exel6245_15	s+/Df(1)Exel6245_15_7
s+/Df(1)Exel6245	41	15	8	s+/Df(1)Exel6245_15	s+/Df(1)Exel6245_15_8
s+/Df(1)Exel6245	45	15	9	s+/Df(1)Exel6245_15	s+/Df(1)Exel6245_15_9
s+/Df(1)Exel6245	32	15	10	s+/Df(1)Exel6245_15	s+/Df(1)Exel6245_15_10
s+/Df(1)Exel6245	34	15	11	s+/Df(1)Exel6245_15	s+/Df(1)Exel6245_15_11
s+/Df(1)Exel6245	33	15	12	s+/Df(1)Exel6245_15	s+/Df(1)Exel6245_15_12
s+/Df(1)Exel6245	40	15	13	s+/Df(1)Exel6245_15	s+/Df(1)Exel6245_15_13
s+/Df(1)Exel6245	39	15	14	s+/Df(1)Exel6245_15	s+/Df(1)Exel6245_15_14
s+/Df(1)Exel6245	49	15	15	s+/Df(1)Exel6245_15	s+/Df(1)Exel6245_15_15
s+/Df(1)Exel6245	49	15	16	s+/Df(1)Exel6245_15	s+/Df(1)Exel6245_15_16
s+/Df(1)Exel6245	77	15	17	s+/Df(1)Exel6245_15	s+/Df(1)Exel6245_15_17
s+/Df(1)Exel6245	68	15	18	s+/Df(1)Exel6245_15	s+/Df(1)Exel6245_15_18
s+/Df(1)Exel6245	49	15	19	s+/Df(1)Exel6245_15	s+/Df(1)Exel6245_15_19
s+/Df(1)Exel6245	51	15	20	s+/Df(1)Exel6245_15	s+/Df(1)Exel6245_15_20
s/Df(1)Exel6245	30	1	1	s/Df(1)Exel6245_1	s/Df(1)Exel6245_1_1
s/Df(1)Exel6245	21	1	2	s/Df(1)Exel6245_1	s/Df(1)Exel6245_1_2
s/Df(1)Exel6245	21	1	3	s/Df(1)Exel6245_1	s/Df(1)Exel6245_1_3
s/Df(1)Exel6245	28	1	4	s/Df(1)Exel6245_1	s/Df(1)Exel6245_1_4
s/Df(1)Exel6245	28	1	5	s/Df(1)Exel6245_1	s/Df(1)Exel6245_1_5
s/Df(1)Exel6245	23	1	6	s/Df(1)Exel6245_1	s/Df(1)Exel6245_1_6
s/Df(1)Exel6245	26	1	7	s/Df(1)Exel6245_1	s/Df(1)Exel6245_1_7
s/Df(1)Exel6245	21	1	8	s/Df(1)Exel6245_1	s/Df(1)Exel6245_1_8
s/Df(1)Exel6245	21	1	9	s/Df(1)Exel6245_1	s/Df(1)Exel6245_1_9
s/Df(1)Exel6245	23	1	10	s/Df(1)Exel6245_1	s/Df(1)Exel6245_1_10
s/Df(1)Exel6245	23	1	11	s/Df(1)Exel6245_1	s/Df(1)Exel6245_1_11
s/Df(1)Exel6245	25	1	12	s/Df(1)Exel6245_1	s/Df(1)Exel6245_1_12
s/Df(1)Exel6245	20	1	13	s/Df(1)Exel6245_1	s/Df(1)Exel6245_1_13
s/Df(1)Exel6245	23	1	14	s/Df(1)Exel6245_1	s/Df(1)Exel6245_1_14
s/Df(1)Exel6245	23	1	15	s/Df(1)Exel6245_1	s/Df(1)Exel6245_1_15
s/Df(1)Exel6245	28	1	16	s/Df(1)Exel6245_1	s/Df(1)Exel6245_1_16
s/Df(1)Exel6245	21	1	17	s/Df(1)Exel6245_1	s/Df(1)Exel6245_1_17
s/Df(1)Exel6245	26	1	18	s/Df(1)Exel6245_1	s/Df(1)Exel6245_1_18
s/Df(1)Exel6245	22	1	19	s/Df(1)Exel6245_1	s/Df(1)Exel6245_1_19
s/Df(1)Exel6245	26	1	20	s/Df(1)Exel6245_1	s/Df(1)Exel6245_1_20
s/Df(1)Exel6245	20	2	1	s/Df(1)Exel6245_2	s/Df(1)Exel6245_2_1
s/Df(1)Exel6245	18	2	2	s/Df(1)Exel6245_2	s/Df(1)Exel6245_2_2
s/Df(1)Exel6245	19	2	3	s/Df(1)Exel6245_2	s/Df(1)Exel6245_2_3
s/Df(1)Exel6245	22	2	4	s/Df(1)Exel6245_2	s/Df(1)Exel6245_2_4
s/Df(1)Exel6245	29	2	5	s/Df(1)Exel6245_2	s/Df(1)Exel6245_2_5
s/Df(1)Exel6245	22	2	6	s/Df(1)Exel6245_2	s/Df(1)Exel6245_2_6
s/Df(1)Exel6245	25	2	7	s/Df(1)Exel6245_2	s/Df(1)Exel6245_2_7
s/Df(1)Exel6245	20	2	8	s/Df(1)Exel6245_2	s/Df(1)Exel6245_2_8
s/Df(1)Exel6245	19	2	9	s/Df(1)Exel6245_2	s/Df(1)Exel6245_2_9
s/Df(1)Exel6245	25	2	10	s/Df(1)Exel6245_2	s/Df(1)Exel6245_2_10
s/Df(1)Exel6245	16	2	11	s/Df(1)Exel6245_2	s/Df(1)Exel6245_2_11
s/Df(1)Exel6245	17	2	12	s/Df(1)Exel6245_2	s/Df(1)Exel6245_2_12
s/Df(1)Exel6245	16	2	13	s/Df(1)Exel6245_2	s/Df(1)Exel6245_2_13
s/Df(1)Exel6245	12	2	14	s/Df(1)Exel6245_2	s/Df(1)Exel6245_2_14
s/Df(1)Exel6245	30	2	15	s/Df(1)Exel6245_2	s/Df(1)Exel6245_2_15
s/Df(1)Exel6245	33	2	16	s/Df(1)Exel6245_2	s/Df(1)Exel6245_2_16
s/Df(1)Exel6245	24	2	17	s/Df(1)Exel6245_2	s/Df(1)Exel6245_2_17
s/Df(1)Exel6245	23	2	18	s/Df(1)Exel6245_2	s/Df(1)Exel6245_2_18
s/Df(1)Exel6245	26	2	19	s/Df(1)Exel6245_2	s/Df(1)Exel6245_2_19
s/Df(1)Exel6245	22	2	20	s/Df(1)Exel6245_2	s/Df(1)Exel6245_2_20
s/Df(1)Exel6245	25	3	1	s/Df(1)Exel6245_3	s/Df(1)Exel6245_3_1
s/Df(1)Exel6245	27	3	2	s/Df(1)Exel6245_3	s/Df(1)Exel6245_3_2
s/Df(1)Exel6245	31	3	3	s/Df(1)Exel6245_3	s/Df(1)Exel6245_3_3
s/Df(1)Exel6245	27	3	4	s/Df(1)Exel6245_3	s/Df(1)Exel6245_3_4
s/Df(1)Exel6245	27	3	5	s/Df(1)Exel6245_3	s/Df(1)Exel6245_3_5
s/Df(1)Exel6245	27	3	6	s/Df(1)Exel6245_3	s/Df(1)Exel6245_3_6
s/Df(1)Exel6245	35	3	7	s/Df(1)Exel6245_3	s/Df(1)Exel6245_3_7
s/Df(1)Exel6245	32	3	8	s/Df(1)Exel6245_3	s/Df(1)Exel6245_3_8
s/Df(1)Exel6245	28	3	9	s/Df(1)Exel6245_3	s/Df(1)Exel6245_3_9
s/Df(1)Exel6245	28	3	10	s/Df(1)Exel6245_3	s/Df(1)Exel6245_3_10
s/Df(1)Exel6245	28	3	11	s/Df(1)Exel6245_3	s/Df(1)Exel6245_3_11
s/Df(1)Exel6245	35	3	12	s/Df(1)Exel6245_3	s/Df(1)Exel6245_3_12
s/Df(1)Exel6245	27	3	13	s/Df(1)Exel6245_3	s/Df(1)Exel6245_3_13
s/Df(1)Exel6245	35	3	14	s/Df(1)Exel6245_3	s/Df(1)Exel6245_3_14
s/Df(1)Exel6245	37	3	15	s/Df(1)Exel6245_3	s/Df(1)Exel6245_3_15
s/Df(1)Exel6245	36	3	16	s/Df(1)Exel6245_3	s/Df(1)Exel6245_3_16
s/Df(1)Exel6245	28	3	17	s/Df(1)Exel6245_3	s/Df(1)Exel6245_3_17
s/Df(1)Exel6245	27	3	18	s/Df(1)Exel6245_3	s/Df(1)Exel6245_3_18
s/Df(1)Exel6245	35	3	19	s/Df(1)Exel6245_3	s/Df(1)Exel6245_3_19
s/Df(1)Exel6245	36	3	20	s/Df(1)Exel6245_3	s/Df(1)Exel6245_3_20
s/Df(1)Exel6245	44	4	1	s/Df(1)Exel6245_4	s/Df(1)Exel6245_4_1
s/Df(1)Exel6245	29	4	2	s/Df(1)Exel6245_4	s/Df(1)Exel6245_4_2
s/Df(1)Exel6245	26	4	3	s/Df(1)Exel6245_4	s/Df(1)Exel6245_4_3
s/Df(1)Exel6245	46	4	4	s/Df(1)Exel6245_4	s/Df(1)Exel6245_4_4
s/Df(1)Exel6245	40	4	5	s/Df(1)Exel6245_4	s/Df(1)Exel6245_4_5
s/Df(1)Exel6245	49	4	6	s/Df(1)Exel6245_4	s/Df(1)Exel6245_4_6
s/Df(1)Exel6245	33	4	7	s/Df(1)Exel6245_4	s/Df(1)Exel6245_4_7
s/Df(1)Exel6245	24	4	8	s/Df(1)Exel6245_4	s/Df(1)Exel6245_4_8
s/Df(1)Exel6245	23	4	9	s/Df(1)Exel6245_4	s/Df(1)Exel6245_4_9
s/Df(1)Exel6245	23	4	10	s/Df(1)Exel6245_4	s/Df(1)Exel6245_4_10
s/Df(1)Exel6245	32	4	11	s/Df(1)Exel6245_4	s/Df(1)Exel6245_4_11
s/Df(1)Exel6245	29	4	12	s/Df(1)Exel6245_4	s/Df(1)Exel6245_4_12
s/Df(1)Exel6245	27	4	13	s/Df(1)Exel6245_4	s/Df(1)Exel6245_4_13
s/Df(1)Exel6245	37	4	14	s/Df(1)Exel6245_4	s/Df(1)Exel6245_4_14
s/Df(1)Exel6245	30	4	15	s/Df(1)Exel6245_4	s/Df(1)Exel6245_4_15
s/Df(1)Exel6245	24	4	16	s/Df(1)Exel6245_4	s/Df(1)Exel6245_4_16
s/Df(1)Exel6245	30	4	17	s/Df(1)Exel6245_4	s/Df(1)Exel6245_4_17
s/Df(1)Exel6245	29	4	18	s/Df(1)Exel6245_4	s/Df(1)Exel6245_4_18
s/Df(1)Exel6245	34	4	19	s/Df(1)Exel6245_4	s/Df(1)Exel6245_4_19
s/Df(1)Exel6245	46	4	20	s/Df(1)Exel6245_4	s/Df(1)Exel6245_4_20
s/Df(1)Exel6245	45	5	1	s/Df(1)Exel6245_5	s/Df(1)Exel6245_5_1
s/Df(1)Exel6245	36	5	2	s/Df(1)Exel6245_5	s/Df(1)Exel6245_5_2
s/Df(1)Exel6245	33	5	3	s/Df(1)Exel6245_5	s/Df(1)Exel6245_5_3
s/Df(1)Exel6245	35	5	4	s/Df(1)Exel6245_5	s/Df(1)Exel6245_5_4
s/Df(1)Exel6245	40	5	5	s/Df(1)Exel6245_5	s/Df(1)Exel6245_5_5
s/Df(1)Exel6245	40	5	6	s/Df(1)Exel6245_5	s/Df(1)Exel6245_5_6
s/Df(1)Exel6245	36	5	7	s/Df(1)Exel6245_5	s/Df(1)Exel6245_5_7
s/Df(1)Exel6245	32	5	8	s/Df(1)Exel6245_5	s/Df(1)Exel6245_5_8
s/Df(1)Exel6245	32	5	9	s/Df(1)Exel6245_5	s/Df(1)Exel6245_5_9
s/Df(1)Exel6245	36	5	10	s/Df(1)Exel6245_5	s/Df(1)Exel6245_5_10
s/Df(1)Exel6245	33	5	11	s/Df(1)Exel6245_5	s/Df(1)Exel6245_5_11
s/Df(1)Exel6245	28	5	12	s/Df(1)Exel6245_5	s/Df(1)Exel6245_5_12
s/Df(1)Exel6245	34	5	13	s/Df(1)Exel6245_5	s/Df(1)Exel6245_5_13
s/Df(1)Exel6245	31	5	14	s/Df(1)Exel6245_5	s/Df(1)Exel6245_5_14
s/Df(1)Exel6245	31	5	15	s/Df(1)Exel6245_5	s/Df(1)Exel6245_5_15
s/Df(1)Exel6245	33	5	16	s/Df(1)Exel6245_5	s/Df(1)Exel6245_5_16
s/Df(1)Exel6245	35	5	17	s/Df(1)Exel6245_5	s/Df(1)Exel6245_5_17
s/Df(1)Exel6245	30	5	18	s/Df(1)Exel6245_5	s/Df(1)Exel6245_5_18
s/Df(1)Exel6245	47	5	19	s/Df(1)Exel6245_5	s/Df(1)Exel6245_5_19
s/Df(1)Exel6245	44	5	20	s/Df(1)Exel6245_5	s/Df(1)Exel6245_5_20
s/Df(1)Exel6245	31	6	1	s/Df(1)Exel6245_6	s/Df(1)Exel6245_6_1
s/Df(1)Exel6245	30	6	2	s/Df(1)Exel6245_6	s/Df(1)Exel6245_6_2
s/Df(1)Exel6245	25	6	3	s/Df(1)Exel6245_6	s/Df(1)Exel6245_6_3
s/Df(1)Exel6245	24	6	4	s/Df(1)Exel6245_6	s/Df(1)Exel6245_6_4
s/Df(1)Exel6245	25	6	5	s/Df(1)Exel6245_6	s/Df(1)Exel6245_6_5
s/Df(1)Exel6245	27	6	6	s/Df(1)Exel6245_6	s/Df(1)Exel6245_6_6
s/Df(1)Exel6245	32	6	7	s/Df(1)Exel6245_6	s/Df(1)Exel6245_6_7
s/Df(1)Exel6245	27	6	8	s/Df(1)Exel6245_6	s/Df(1)Exel6245_6_8
s/Df(1)Exel6245	29	6	9	s/Df(1)Exel6245_6	s/Df(1)Exel6245_6_9
s/Df(1)Exel6245	23	6	10	s/Df(1)Exel6245_6	s/Df(1)Exel6245_6_10
s/Df(1)Exel6245	25	6	11	s/Df(1)Exel6245_6	s/Df(1)Exel6245_6_11
s/Df(1)Exel6245	25	6	12	s/Df(1)Exel6245_6	s/Df(1)Exel6245_6_12
s/Df(1)Exel6245	29	6	13	s/Df(1)Exel6245_6	s/Df(1)Exel6245_6_13
s/Df(1)Exel6245	31	6	14	s/Df(1)Exel6245_6	s/Df(1)Exel6245_6_14
s/Df(1)Exel6245	43	6	15	s/Df(1)Exel6245_6	s/Df(1)Exel6245_6_15
s/Df(1)Exel6245	34	6	16	s/Df(1)Exel6245_6	s/Df(1)Exel6245_6_16
s/Df(1)Exel6245	38	6	17	s/Df(1)Exel6245_6	s/Df(1)Exel6245_6_17
s/Df(1)Exel6245	37	6	18	s/Df(1)Exel6245_6	s/Df(1)Exel6245_6_18
s/Df(1)Exel6245	28	6	19	s/Df(1)Exel6245_6	s/Df(1)Exel6245_6_19
s/Df(1)Exel6245	35	6	20	s/Df(1)Exel6245_6	s/Df(1)Exel6245_6_20
s/Df(1)Exel6245	32	7	1	s/Df(1)Exel6245_7	s/Df(1)Exel6245_7_1
s/Df(1)Exel6245	28	7	2	s/Df(1)Exel6245_7	s/Df(1)Exel6245_7_2
s/Df(1)Exel6245	25	7	3	s/Df(1)Exel6245_7	s/Df(1)Exel6245_7_3
s/Df(1)Exel6245	37	7	4	s/Df(1)Exel6245_7	s/Df(1)Exel6245_7_4
s/Df(1)Exel6245	39	7	5	s/Df(1)Exel6245_7	s/Df(1)Exel6245_7_5
s/Df(1)Exel6245	33	7	6	s/Df(1)Exel6245_7	s/Df(1)Exel6245_7_6
s/Df(1)Exel6245	35	7	7	s/Df(1)Exel6245_7	s/Df(1)Exel6245_7_7
s/Df(1)Exel6245	29	7	8	s/Df(1)Exel6245_7	s/Df(1)Exel6245_7_8
s/Df(1)Exel6245	30	7	9	s/Df(1)Exel6245_7	s/Df(1)Exel6245_7_9
s/Df(1)Exel6245	27	7	10	s/Df(1)Exel6245_7	s/Df(1)Exel6245_7_10
s/Df(1)Exel6245	23	7	11	s/Df(1)Exel6245_7	s/Df(1)Exel6245_7_11
s/Df(1)Exel6245	24	7	12	s/Df(1)Exel6245_7	s/Df(1)Exel6245_7_12
s/Df(1)Exel6245	26	7	13	s/Df(1)Exel6245_7	s/Df(1)Exel6245_7_13
s/Df(1)Exel6245	21	7	14	s/Df(1)Exel6245_7	s/Df(1)Exel6245_7_14
s/Df(1)Exel6245	24	7	15	s/Df(1)Exel6245_7	s/Df(1)Exel6245_7_15
s/Df(1)Exel6245	24	7	16	s/Df(1)Exel6245_7	s/Df(1)Exel6245_7_16
s/Df(1)Exel6245	26	7	17	s/Df(1)Exel6245_7	s/Df(1)Exel6245_7_17
s/Df(1)Exel6245	26	7	18	s/Df(1)Exel6245_7	s/Df(1)Exel6245_7_18
s/Df(1)Exel6245	31	7	19	s/Df(1)Exel6245_7	s/Df(1)Exel6245_7_19
s/Df(1)Exel6245	42	7	20	s/Df(1)Exel6245_7	s/Df(1)Exel6245_7_20
s/Df(1)Exel6245	28	8	1	s/Df(1)Exel6245_8	s/Df(1)Exel6245_8_1
s/Df(1)Exel6245	41	8	2	s/Df(1)Exel6245_8	s/Df(1)Exel6245_8_2
s/Df(1)Exel6245	38	8	3	s/Df(1)Exel6245_8	s/Df(1)Exel6245_8_3
s/Df(1)Exel6245	39	8	4	s/Df(1)Exel6245_8	s/Df(1)Exel6245_8_4
s/Df(1)Exel6245	21	8	5	s/Df(1)Exel6245_8	s/Df(1)Exel6245_8_5
s/Df(1)Exel6245	36	8	6	s/Df(1)Exel6245_8	s/Df(1)Exel6245_8_6
s/Df(1)Exel6245	30	8	7	s/Df(1)Exel6245_8	s/Df(1)Exel6245_8_7
s/Df(1)Exel6245	31	8	8	s/Df(1)Exel6245_8	s/Df(1)Exel6245_8_8
s/Df(1)Exel6245	32	8	9	s/Df(1)Exel6245_8	s/Df(1)Exel6245_8_9
s/Df(1)Exel6245	25	8	10	s/Df(1)Exel6245_8	s/Df(1)Exel6245_8_10
s/Df(1)Exel6245	26	8	11	s/Df(1)Exel6245_8	s/Df(1)Exel6245_8_11
s/Df(1)Exel6245	31	8	12	s/Df(1)Exel6245_8	s/Df(1)Exel6245_8_12
s/Df(1)Exel6245	24	8	13	s/Df(1)Exel6245_8	s/Df(1)Exel6245_8_13
s/Df(1)Exel6245	31	8	14	s/Df(1)Exel6245_8	s/Df(1)Exel6245_8_14
s/Df(1)Exel6245	36	8	15	s/Df(1)Exel6245_8	s/Df(1)Exel6245_8_15
s/Df(1)Exel6245	25	8	16	s/Df(1)Exel6245_8	s/Df(1)Exel6245_8_16
s/Df(1)Exel6245	29	8	17	s/Df(1)Exel6245_8	s/Df(1)Exel6245_8_17
s/Df(1)Exel6245	33	8	18	s/Df(1)Exel6245_8	s/Df(1)Exel6245_8_18
s/Df(1)Exel6245	27	8	19	s/Df(1)Exel6245_8	s/Df(1)Exel6245_8_19
s/Df(1)Exel6245	22	8	20	s/Df(1)Exel6245_8	s/Df(1)Exel6245_8_20
s/Df(1)Exel6245	20	9	1	s/Df(1)Exel6245_9	s/Df(1)Exel6245_9_1
s/Df(1)Exel6245	22	9	2	s/Df(1)Exel6245_9	s/Df(1)Exel6245_9_2
s/Df(1)Exel6245	29	9	3	s/Df(1)Exel6245_9	s/Df(1)Exel6245_9_3
s/Df(1)Exel6245	36	9	4	s/Df(1)Exel6245_9	s/Df(1)Exel6245_9_4
s/Df(1)Exel6245	28	9	5	s/Df(1)Exel6245_9	s/Df(1)Exel6245_9_5
s/Df(1)Exel6245	33	9	6	s/Df(1)Exel6245_9	s/Df(1)Exel6245_9_6
s/Df(1)Exel6245	25	9	7	s/Df(1)Exel6245_9	s/Df(1)Exel6245_9_7
s/Df(1)Exel6245	24	9	8	s/Df(1)Exel6245_9	s/Df(1)Exel6245_9_8
s/Df(1)Exel6245	20	9	9	s/Df(1)Exel6245_9	s/Df(1)Exel6245_9_9
s/Df(1)Exel6245	21	9	10	s/Df(1)Exel6245_9	s/Df(1)Exel6245_9_10
s/Df(1)Exel6245	24	9	11	s/Df(1)Exel6245_9	s/Df(1)Exel6245_9_11
s/Df(1)Exel6245	17	9	12	s/Df(1)Exel6245_9	s/Df(1)Exel6245_9_12
s/Df(1)Exel6245	29	9	13	s/Df(1)Exel6245_9	s/Df(1)Exel6245_9_13
s/Df(1)Exel6245	28	9	14	s/Df(1)Exel6245_9	s/Df(1)Exel6245_9_14
s/Df(1)Exel6245	38	9	15	s/Df(1)Exel6245_9	s/Df(1)Exel6245_9_15
s/Df(1)Exel6245	42	9	16	s/Df(1)Exel6245_9	s/Df(1)Exel6245_9_16
s/Df(1)Exel6245	25	9	17	s/Df(1)Exel6245_9	s/Df(1)Exel6245_9_17
s/Df(1)Exel6245	24	9	18	s/Df(1)Exel6245_9	s/Df(1)Exel6245_9_18
s/Df(1)Exel6245	29	9	19	s/Df(1)Exel6245_9	s/Df(1)Exel6245_9_19
s/Df(1)Exel6245	23	9	20	s/Df(1)Exel6245_9	s/Df(1)Exel6245_9_20
s/Df(1)Exel6245	34	10	1	s/Df(1)Exel6245_10	s/Df(1)Exel6245_10_1
s/Df(1)Exel6245	45	10	2	s/Df(1)Exel6245_10	s/Df(1)Exel6245_10_2
s/Df(1)Exel6245	37	10	3	s/Df(1)Exel6245_10	s/Df(1)Exel6245_10_3
s/Df(1)Exel6245	46	10	4	s/Df(1)Exel6245_10	s/Df(1)Exel6245_10_4
s/Df(1)Exel6245	42	10	5	s/Df(1)Exel6245_10	s/Df(1)Exel6245_10_5
s/Df(1)Exel6245	54	10	6	s/Df(1)Exel6245_10	s/Df(1)Exel6245_10_6
s/Df(1)Exel6245	39	10	7	s/Df(1)Exel6245_10	s/Df(1)Exel6245_10_7
s/Df(1)Exel6245	38	10	8	s/Df(1)Exel6245_10	s/Df(1)Exel6245_10_8
s/Df(1)Exel6245	47	10	9	s/Df(1)Exel6245_10	s/Df(1)Exel6245_10_9
s/Df(1)Exel6245	45	10	10	s/Df(1)Exel6245_10	s/Df(1)Exel6245_10_10
s/Df(1)Exel6245	40	10	11	s/Df(1)Exel6245_10	s/Df(1)Exel6245_10_11
s/Df(1)Exel6245	36	10	12	s/Df(1)Exel6245_10	s/Df(1)Exel6245_10_12
s/Df(1)Exel6245	44	10	13	s/Df(1)Exel6245_10	s/Df(1)Exel6245_10_13
s/Df(1)Exel6245	38	10	14	s/Df(1)Exel6245_10	s/Df(1)Exel6245_10_14
s/Df(1)Exel6245	44	10	15	s/Df(1)Exel6245_10	s/Df(1)Exel6245_10_15
s/Df(1)Exel6245	50	10	16	s/Df(1)Exel6245_10	s/Df(1)Exel6245_10_16
s/Df(1)Exel6245	48	10	17	s/Df(1)Exel6245_10	s/Df(1)Exel6245_10_17
s/Df(1)Exel6245	44	10	18	s/Df(1)Exel6245_10	s/Df(1)Exel6245_10_18
s/Df(1)Exel6245	46	10	19	s/Df(1)Exel6245_10	s/Df(1)Exel6245_10_19
s/Df(1)Exel6245	35	10	20	s/Df(1)Exel6245_10	s/Df(1)Exel6245_10_20
s/Df(1)Exel6245	35	11	1	s/Df(1)Exel6245_11	s/Df(1)Exel6245_11_1
s/Df(1)Exel6245	22	11	2	s/Df(1)Exel6245_11	s/Df(1)Exel6245_11_2
s/Df(1)Exel6245	36	11	3	s/Df(1)Exel6245_11	s/Df(1)Exel6245_11_3
s/Df(1)Exel6245	43	11	4	s/Df(1)Exel6245_11	s/Df(1)Exel6245_11_4
s/Df(1)Exel6245	42	11	5	s/Df(1)Exel6245_11	s/Df(1)Exel6245_11_5
s/Df(1)Exel6245	46	11	6	s/Df(1)Exel6245_11	s/Df(1)Exel6245_11_6
s/Df(1)Exel6245	34	11	7	s/Df(1)Exel6245_11	s/Df(1)Exel6245_11_7
s/Df(1)Exel6245	36	11	8	s/Df(1)Exel6245_11	s/Df(1)Exel6245_11_8
s/Df(1)Exel6245	37	11	9	s/Df(1)Exel6245_11	s/Df(1)Exel6245_11_9
s/Df(1)Exel6245	41	11	10	s/Df(1)Exel6245_11	s/Df(1)Exel6245_11_10
s/Df(1)Exel6245	25	11	11	s/Df(1)Exel6245_11	s/Df(1)Exel6245_11_11
s/Df(1)Exel6245	30	11	12	s/Df(1)Exel6245_11	s/Df(1)Exel6245_11_12
s/Df(1)Exel6245	27	11	13	s/Df(1)Exel6245_11	s/Df(1)Exel6245_11_13
s/Df(1)Exel6245	35	11	14	s/Df(1)Exel6245_11	s/Df(1)Exel6245_11_14
s/Df(1)Exel6245	37	11	15	s/Df(1)Exel6245_11	s/Df(1)Exel6245_11_15
s/Df(1)Exel6245	40	11	16	s/Df(1)Exel6245_11	s/Df(1)Exel6245_11_16
s/Df(1)Exel6245	36	11	17	s/Df(1)Exel6245_11	s/Df(1)Exel6245_11_17
s/Df(1)Exel6245	34	11	18	s/Df(1)Exel6245_11	s/Df(1)Exel6245_11_18
s/Df(1)Exel6245	35	11	19	s/Df(1)Exel6245_11	s/Df(1)Exel6245_11_19
s/Df(1)Exel6245	40	11	20	s/Df(1)Exel6245_11	s/Df(1)Exel6245_11_20
s/Df(1)Exel6245	32	12	1	s/Df(1)Exel6245_12	s/Df(1)Exel6245_12_1
s/Df(1)Exel6245	21	12	2	s/Df(1)Exel6245_12	s/Df(1)Exel6245_12_2
s/Df(1)Exel6245	21	12	3	s/Df(1)Exel6245_12	s/Df(1)Exel6245_12_3
s/Df(1)Exel6245	27	12	4	s/Df(1)Exel6245_12	s/Df(1)Exel6245_12_4
s/Df(1)Exel6245	31	12	5	s/Df(1)Exel6245_12	s/Df(1)Exel6245_12_5
s/Df(1)Exel6245	25	12	6	s/Df(1)Exel6245_12	s/Df(1)Exel6245_12_6
s/Df(1)Exel6245	27	12	7	s/Df(1)Exel6245_12	s/Df(1)Exel6245_12_7
s/Df(1)Exel6245	23	12	8	s/Df(1)Exel6245_12	s/Df(1)Exel6245_12_8
s/Df(1)Exel6245	15	12	9	s/Df(1)Exel6245_12	s/Df(1)Exel6245_12_9
s/Df(1)Exel6245	25	12	10	s/Df(1)Exel6245_12	s/Df(1)Exel6245_12_10
s/Df(1)Exel6245	22	12	11	s/Df(1)Exel6245_12	s/Df(1)Exel6245_12_11
s/Df(1)Exel6245	20	12	12	s/Df(1)Exel6245_12	s/Df(1)Exel6245_12_12
s/Df(1)Exel6245	30	12	13	s/Df(1)Exel6245_12	s/Df(1)Exel6245_12_13
s/Df(1)Exel6245	19	12	14	s/Df(1)Exel6245_12	s/Df(1)Exel6245_12_14
s/Df(1)Exel6245	24	12	15	s/Df(1)Exel6245_12	s/Df(1)Exel6245_12_15
s/Df(1)Exel6245	23	12	16	s/Df(1)Exel6245_12	s/Df(1)Exel6245_12_16
s/Df(1)Exel6245	26	12	17	s/Df(1)Exel6245_12	s/Df(1)Exel6245_12_17
s/Df(1)Exel6245	26	12	18	s/Df(1)Exel6245_12	s/Df(1)Exel6245_12_18
s/Df(1)Exel6245	19	12	19	s/Df(1)Exel6245_12	s/Df(1)Exel6245_12_19
s/Df(1)Exel6245	23	12	20	s/Df(1)Exel6245_12	s/Df(1)Exel6245_12_20
s/Df(1)Exel6245	30	13	1	s/Df(1)Exel6245_13	s/Df(1)Exel6245_13_1
s/Df(1)Exel6245	27	13	2	s/Df(1)Exel6245_13	s/Df(1)Exel6245_13_2
s/Df(1)Exel6245	36	13	3	s/Df(1)Exel6245_13	s/Df(1)Exel6245_13_3
s/Df(1)Exel6245	32	13	4	s/Df(1)Exel6245_13	s/Df(1)Exel6245_13_4
s/Df(1)Exel6245	36	13	5	s/Df(1)Exel6245_13	s/Df(1)Exel6245_13_5
s/Df(1)Exel6245	34	13	6	s/Df(1)Exel6245_13	s/Df(1)Exel6245_13_6
s/Df(1)Exel6245	37	13	7	s/Df(1)Exel6245_13	s/Df(1)Exel6245_13_7
s/Df(1)Exel6245	34	13	8	s/Df(1)Exel6245_13	s/Df(1)Exel6245_13_8
s/Df(1)Exel6245	32	13	9	s/Df(1)Exel6245_13	s/Df(1)Exel6245_13_9
s/Df(1)Exel6245	35	13	10	s/Df(1)Exel6245_13	s/Df(1)Exel6245_13_10
s/Df(1)Exel6245	40	13	11	s/Df(1)Exel6245_13	s/Df(1)Exel6245_13_11
s/Df(1)Exel6245	29	13	12	s/Df(1)Exel6245_13	s/Df(1)Exel6245_13_12
s/Df(1)Exel6245	25	13	13	s/Df(1)Exel6245_13	s/Df(1)Exel6245_13_13
s/Df(1)Exel6245	31	13	14	s/Df(1)Exel6245_13	s/Df(1)Exel6245_13_14
s/Df(1)Exel6245	29	13	15	s/Df(1)Exel6245_13	s/Df(1)Exel6245_13_15
s/Df(1)Exel6245	27	13	16	s/Df(1)Exel6245_13	s/Df(1)Exel6245_13_16
s/Df(1)Exel6245	29	13	17	s/Df(1)Exel6245_13	s/Df(1)Exel6245_13_17
s/Df(1)Exel6245	34	13	18	s/Df(1)Exel6245_13	s/Df(1)Exel6245_13_18
s/Df(1)Exel6245	30	13	19	s/Df(1)Exel6245_13	s/Df(1)Exel6245_13_19
s/Df(1)Exel6245	30	13	20	s/Df(1)Exel6245_13	s/Df(1)Exel6245_13_20
s/Df(1)Exel6245	22	14	1	s/Df(1)Exel6245_14	s/Df(1)Exel6245_14_1
s/Df(1)Exel6245	24	14	2	s/Df(1)Exel6245_14	s/Df(1)Exel6245_14_2
s/Df(1)Exel6245	21	14	3	s/Df(1)Exel6245_14	s/Df(1)Exel6245_14_3
s/Df(1)Exel6245	26	14	4	s/Df(1)Exel6245_14	s/Df(1)Exel6245_14_4
s/Df(1)Exel6245	33	14	5	s/Df(1)Exel6245_14	s/Df(1)Exel6245_14_5
s/Df(1)Exel6245	16	14	6	s/Df(1)Exel6245_14	s/Df(1)Exel6245_14_6
s/Df(1)Exel6245	23	14	7	s/Df(1)Exel6245_14	s/Df(1)Exel6245_14_7
s/Df(1)Exel6245	13	14	8	s/Df(1)Exel6245_14	s/Df(1)Exel6245_14_8
s/Df(1)Exel6245	18	14	9	s/Df(1)Exel6245_14	s/Df(1)Exel6245_14_9
s/Df(1)Exel6245	23	14	10	s/Df(1)Exel6245_14	s/Df(1)Exel6245_14_10
s/Df(1)Exel6245	25	14	11	s/Df(1)Exel6245_14	s/Df(1)Exel6245_14_11
s/Df(1)Exel6245	28	14	12	s/Df(1)Exel6245_14	s/Df(1)Exel6245_14_12
s/Df(1)Exel6245	22	14	13	s/Df(1)Exel6245_14	s/Df(1)Exel6245_14_13
s/Df(1)Exel6245	28	14	14	s/Df(1)Exel6245_14	s/Df(1)Exel6245_14_14
s/Df(1)Exel6245	20	14	15	s/Df(1)Exel6245_14	s/Df(1)Exel6245_14_15
s/Df(1)Exel6245	26	14	16	s/Df(1)Exel6245_14	s/Df(1)Exel6245_14_16
s/Df(1)Exel6245	15	14	17	s/Df(1)Exel6245_14	s/Df(1)Exel6245_14_17
s/Df(1)Exel6245	20	14	18	s/Df(1)Exel6245_14	s/Df(1)Exel6245_14_18
s/Df(1)Exel6245	29	14	19	s/Df(1)Exel6245_14	s/Df(1)Exel6245_14_19
s/Df(1)Exel6245	20	14	20	s/Df(1)Exel6245_14	s/Df(1)Exel6245_14_20
s/Df(1)Exel6245	29	15	1	s/Df(1)Exel6245_15	s/Df(1)Exel6245_15_1
s/Df(1)Exel6245	27	15	2	s/Df(1)Exel6245_15	s/Df(1)Exel6245_15_2
s/Df(1)Exel6245	21	15	3	s/Df(1)Exel6245_15	s/Df(1)Exel6245_15_3
s/Df(1)Exel6245	32	15	4	s/Df(1)Exel6245_15	s/Df(1)Exel6245_15_4
s/Df(1)Exel6245	36	15	5	s/Df(1)Exel6245_15	s/Df(1)Exel6245_15_5
s/Df(1)Exel6245	26	15	6	s/Df(1)Exel6245_15	s/Df(1)Exel6245_15_6
s/Df(1)Exel6245	36	15	7	s/Df(1)Exel6245_15	s/Df(1)Exel6245_15_7
s/Df(1)Exel6245	29	15	8	s/Df(1)Exel6245_15	s/Df(1)Exel6245_15_8
s/Df(1)Exel6245	22	15	9	s/Df(1)Exel6245_15	s/Df(1)Exel6245_15_9
s/Df(1)Exel6245	26	15	10	s/Df(1)Exel6245_15	s/Df(1)Exel6245_15_10
s/Df(1)Exel6245	18	15	11	s/Df(1)Exel6245_15	s/Df(1)Exel6245_15_11
s/Df(1)Exel6245	25	15	12	s/Df(1)Exel6245_15	s/Df(1)Exel6245_15_12
s/Df(1)Exel6245	22	15	13	s/Df(1)Exel6245_15	s/Df(1)Exel6245_15_13
s/Df(1)Exel6245	27	15	14	s/Df(1)Exel6245_15	s/Df(1)Exel6245_15_14
s/Df(1)Exel6245	22	15	15	s/Df(1)Exel6245_15	s/Df(1)Exel6245_15_15
s/Df(1)Exel6245	36	15	16	s/Df(1)Exel6245_15	s/Df(1)Exel6245_15_16
s/Df(1)Exel6245	25	15	17	s/Df(1)Exel6245_15	s/Df(1)Exel6245_15_17
s/Df(1)Exel6245	18	15	18	s/Df(1)Exel6245_15	s/Df(1)Exel6245_15_18
s/Df(1)Exel6245	15	15	19	s/Df(1)Exel6245_15	s/Df(1)Exel6245_15_19
s/Df(1)Exel6245	16	15	20	s/Df(1)Exel6245_15	s/Df(1)Exel6245_15_20

## Sheet: Expt 2-Figure 2L data
Genotype	Gray value	fly	pixel	flyid	pixelid
s+/Y	53	1	1	s+/Y_1	s+/Y_1_1
s+/Y	56	1	2	s+/Y_1	s+/Y_1_2
s+/Y	45	1	3	s+/Y_1	s+/Y_1_3
s+/Y	51	1	4	s+/Y_1	s+/Y_1_4
s+/Y	61	1	5	s+/Y_1	s+/Y_1_5
s+/Y	63	1	6	s+/Y_1	s+/Y_1_6
s+/Y	42	1	7	s+/Y_1	s+/Y_1_7
s+/Y	43	1	8	s+/Y_1	s+/Y_1_8
s+/Y	35	1	9	s+/Y_1	s+/Y_1_9
s+/Y	31	1	10	s+/Y_1	s+/Y_1_10
s+/Y	35	1	11	s+/Y_1	s+/Y_1_11
s+/Y	50	1	12	s+/Y_1	s+/Y_1_12
s+/Y	34	1	13	s+/Y_1	s+/Y_1_13
s+/Y	41	1	14	s+/Y_1	s+/Y_1_14
s+/Y	54	1	15	s+/Y_1	s+/Y_1_15
s+/Y	82	1	16	s+/Y_1	s+/Y_1_16
s+/Y	67	1	17	s+/Y_1	s+/Y_1_17
s+/Y	59	1	18	s+/Y_1	s+/Y_1_18
s+/Y	49	1	19	s+/Y_1	s+/Y_1_19
s+/Y	50	1	20	s+/Y_1	s+/Y_1_20
s+/Y	70	2	1	s+/Y_2	s+/Y_2_1
s+/Y	73	2	2	s+/Y_2	s+/Y_2_2
s+/Y	82	2	3	s+/Y_2	s+/Y_2_3
s+/Y	87	2	4	s+/Y_2	s+/Y_2_4
s+/Y	96	2	5	s+/Y_2	s+/Y_2_5
s+/Y	86	2	6	s+/Y_2	s+/Y_2_6
s+/Y	79	2	7	s+/Y_2	s+/Y_2_7
s+/Y	71	2	8	s+/Y_2	s+/Y_2_8
s+/Y	54	2	9	s+/Y_2	s+/Y_2_9
s+/Y	48	2	10	s+/Y_2	s+/Y_2_10
s+/Y	54	2	11	s+/Y_2	s+/Y_2_11
s+/Y	79	2	12	s+/Y_2	s+/Y_2_12
s+/Y	53	2	13	s+/Y_2	s+/Y_2_13
s+/Y	60	2	14	s+/Y_2	s+/Y_2_14
s+/Y	62	2	15	s+/Y_2	s+/Y_2_15
s+/Y	68	2	16	s+/Y_2	s+/Y_2_16
s+/Y	79	2	17	s+/Y_2	s+/Y_2_17
s+/Y	71	2	18	s+/Y_2	s+/Y_2_18
s+/Y	69	2	19	s+/Y_2	s+/Y_2_19
s+/Y	66	2	20	s+/Y_2	s+/Y_2_20
s+/Y	75	3	1	s+/Y_3	s+/Y_3_1
s+/Y	73	3	2	s+/Y_3	s+/Y_3_2
s+/Y	80	3	3	s+/Y_3	s+/Y_3_3
s+/Y	78	3	4	s+/Y_3	s+/Y_3_4
s+/Y	77	3	5	s+/Y_3	s+/Y_3_5
s+/Y	82	3	6	s+/Y_3	s+/Y_3_6
s+/Y	84	3	7	s+/Y_3	s+/Y_3_7
s+/Y	63	3	8	s+/Y_3	s+/Y_3_8
s+/Y	78	3	9	s+/Y_3	s+/Y_3_9
s+/Y	82	3	10	s+/Y_3	s+/Y_3_10
s+/Y	95	3	11	s+/Y_3	s+/Y_3_11
s+/Y	74	3	12	s+/Y_3	s+/Y_3_12
s+/Y	70	3	13	s+/Y_3	s+/Y_3_13
s+/Y	72	3	14	s+/Y_3	s+/Y_3_14
s+/Y	79	3	15	s+/Y_3	s+/Y_3_15
s+/Y	67	3	16	s+/Y_3	s+/Y_3_16
s+/Y	70	3	17	s+/Y_3	s+/Y_3_17
s+/Y	81	3	18	s+/Y_3	s+/Y_3_18
s+/Y	83	3	19	s+/Y_3	s+/Y_3_19
s+/Y	76	3	20	s+/Y_3	s+/Y_3_20
s+/Y	70	4	1	s+/Y_4	s+/Y_4_1
s+/Y	63	4	2	s+/Y_4	s+/Y_4_2
s+/Y	63	4	3	s+/Y_4	s+/Y_4_3
s+/Y	60	4	4	s+/Y_4	s+/Y_4_4
s+/Y	61	4	5	s+/Y_4	s+/Y_4_5
s+/Y	63	4	6	s+/Y_4	s+/Y_4_6
s+/Y	62	4	7	s+/Y_4	s+/Y_4_7
s+/Y	64	4	8	s+/Y_4	s+/Y_4_8
s+/Y	59	4	9	s+/Y_4	s+/Y_4_9
s+/Y	65	4	10	s+/Y_4	s+/Y_4_10
s+/Y	80	4	11	s+/Y_4	s+/Y_4_11
s+/Y	72	4	12	s+/Y_4	s+/Y_4_12
s+/Y	70	4	13	s+/Y_4	s+/Y_4_13
s+/Y	64	4	14	s+/Y_4	s+/Y_4_14
s+/Y	69	4	15	s+/Y_4	s+/Y_4_15
s+/Y	66	4	16	s+/Y_4	s+/Y_4_16
s+/Y	54	4	17	s+/Y_4	s+/Y_4_17
s+/Y	54	4	18	s+/Y_4	s+/Y_4_18
s+/Y	64	4	19	s+/Y_4	s+/Y_4_19
s+/Y	62	4	20	s+/Y_4	s+/Y_4_20
s+/Y	60	5	1	s+/Y_5	s+/Y_5_1
s+/Y	66	5	2	s+/Y_5	s+/Y_5_2
s+/Y	50	5	3	s+/Y_5	s+/Y_5_3
s+/Y	58	5	4	s+/Y_5	s+/Y_5_4
s+/Y	61	5	5	s+/Y_5	s+/Y_5_5
s+/Y	62	5	6	s+/Y_5	s+/Y_5_6
s+/Y	58	5	7	s+/Y_5	s+/Y_5_7
s+/Y	54	5	8	s+/Y_5	s+/Y_5_8
s+/Y	53	5	9	s+/Y_5	s+/Y_5_9
s+/Y	56	5	10	s+/Y_5	s+/Y_5_10
s+/Y	60	5	11	s+/Y_5	s+/Y_5_11
s+/Y	68	5	12	s+/Y_5	s+/Y_5_12
s+/Y	60	5	13	s+/Y_5	s+/Y_5_13
s+/Y	55	5	14	s+/Y_5	s+/Y_5_14
s+/Y	49	5	15	s+/Y_5	s+/Y_5_15
s+/Y	51	5	16	s+/Y_5	s+/Y_5_16
s+/Y	58	5	17	s+/Y_5	s+/Y_5_17
s+/Y	60	5	18	s+/Y_5	s+/Y_5_18
s+/Y	51	5	19	s+/Y_5	s+/Y_5_19
s+/Y	53	5	20	s+/Y_5	s+/Y_5_20
s+/Y	62	6	1	s+/Y_6	s+/Y_6_1
s+/Y	74	6	2	s+/Y_6	s+/Y_6_2
s+/Y	68	6	3	s+/Y_6	s+/Y_6_3
s+/Y	67	6	4	s+/Y_6	s+/Y_6_4
s+/Y	79	6	5	s+/Y_6	s+/Y_6_5
s+/Y	92	6	6	s+/Y_6	s+/Y_6_6
s+/Y	73	6	7	s+/Y_6	s+/Y_6_7
s+/Y	71	6	8	s+/Y_6	s+/Y_6_8
s+/Y	55	6	9	s+/Y_6	s+/Y_6_9
s+/Y	65	6	10	s+/Y_6	s+/Y_6_10
s+/Y	55	6	11	s+/Y_6	s+/Y_6_11
s+/Y	70	6	12	s+/Y_6	s+/Y_6_12
s+/Y	60	6	13	s+/Y_6	s+/Y_6_13
s+/Y	74	6	14	s+/Y_6	s+/Y_6_14
s+/Y	74	6	15	s+/Y_6	s+/Y_6_15
s+/Y	66	6	16	s+/Y_6	s+/Y_6_16
s+/Y	81	6	17	s+/Y_6	s+/Y_6_17
s+/Y	76	6	18	s+/Y_6	s+/Y_6_18
s+/Y	70	6	19	s+/Y_6	s+/Y_6_19
s+/Y	56	6	20	s+/Y_6	s+/Y_6_20
s+/Y	74	7	1	s+/Y_7	s+/Y_7_1
s+/Y	59	7	2	s+/Y_7	s+/Y_7_2
s+/Y	82	7	3	s+/Y_7	s+/Y_7_3
s+/Y	76	7	4	s+/Y_7	s+/Y_7_4
s+/Y	90	7	5	s+/Y_7	s+/Y_7_5
s+/Y	84	7	6	s+/Y_7	s+/Y_7_6
s+/Y	82	7	7	s+/Y_7	s+/Y_7_7
s+/Y	78	7	8	s+/Y_7	s+/Y_7_8
s+/Y	79	7	9	s+/Y_7	s+/Y_7_9
s+/Y	76	7	10	s+/Y_7	s+/Y_7_10
s+/Y	79	7	11	s+/Y_7	s+/Y_7_11
s+/Y	67	7	12	s+/Y_7	s+/Y_7_12
s+/Y	72	7	13	s+/Y_7	s+/Y_7_13
s+/Y	72	7	14	s+/Y_7	s+/Y_7_14
s+/Y	85	7	15	s+/Y_7	s+/Y_7_15
s+/Y	78	7	16	s+/Y_7	s+/Y_7_16
s+/Y	77	7	17	s+/Y_7	s+/Y_7_17
s+/Y	83	7	18	s+/Y_7	s+/Y_7_18
s+/Y	78	7	19	s+/Y_7	s+/Y_7_19
s+/Y	77	7	20	s+/Y_7	s+/Y_7_20
s+/Y	79	8	1	s+/Y_8	s+/Y_8_1
s+/Y	74	8	2	s+/Y_8	s+/Y_8_2
s+/Y	83	8	3	s+/Y_8	s+/Y_8_3
s+/Y	85	8	4	s+/Y_8	s+/Y_8_4
s+/Y	88	8	5	s+/Y_8	s+/Y_8_5
s+/Y	81	8	6	s+/Y_8	s+/Y_8_6
s+/Y	86	8	7	s+/Y_8	s+/Y_8_7
s+/Y	69	8	8	s+/Y_8	s+/Y_8_8
s+/Y	83	8	9	s+/Y_8	s+/Y_8_9
s+/Y	85	8	10	s+/Y_8	s+/Y_8_10
s+/Y	90	8	11	s+/Y_8	s+/Y_8_11
s+/Y	79	8	12	s+/Y_8	s+/Y_8_12
s+/Y	75	8	13	s+/Y_8	s+/Y_8_13
s+/Y	90	8	14	s+/Y_8	s+/Y_8_14
s+/Y	86	8	15	s+/Y_8	s+/Y_8_15
s+/Y	77	8	16	s+/Y_8	s+/Y_8_16
s+/Y	82	8	17	s+/Y_8	s+/Y_8_17
s+/Y	84	8	18	s+/Y_8	s+/Y_8_18
s+/Y	87	8	19	s+/Y_8	s+/Y_8_19
s+/Y	82	8	20	s+/Y_8	s+/Y_8_20
s+/Y	44	9	1	s+/Y_9	s+/Y_9_1
s+/Y	57	9	2	s+/Y_9	s+/Y_9_2
s+/Y	47	9	3	s+/Y_9	s+/Y_9_3
s+/Y	58	9	4	s+/Y_9	s+/Y_9_4
s+/Y	55	9	5	s+/Y_9	s+/Y_9_5
s+/Y	44	9	6	s+/Y_9	s+/Y_9_6
s+/Y	56	9	7	s+/Y_9	s+/Y_9_7
s+/Y	52	9	8	s+/Y_9	s+/Y_9_8
s+/Y	50	9	9	s+/Y_9	s+/Y_9_9
s+/Y	34	9	10	s+/Y_9	s+/Y_9_10
s+/Y	43	9	11	s+/Y_9	s+/Y_9_11
s+/Y	42	9	12	s+/Y_9	s+/Y_9_12
s+/Y	51	9	13	s+/Y_9	s+/Y_9_13
s+/Y	41	9	14	s+/Y_9	s+/Y_9_14
s+/Y	61	9	15	s+/Y_9	s+/Y_9_15
s+/Y	61	9	16	s+/Y_9	s+/Y_9_16
s+/Y	58	9	17	s+/Y_9	s+/Y_9_17
s+/Y	52	9	18	s+/Y_9	s+/Y_9_18
s+/Y	48	9	19	s+/Y_9	s+/Y_9_19
s+/Y	37	9	20	s+/Y_9	s+/Y_9_20
s+/Y	52	10	1	s+/Y_10	s+/Y_10_1
s+/Y	58	10	2	s+/Y_10	s+/Y_10_2
s+/Y	49	10	3	s+/Y_10	s+/Y_10_3
s+/Y	64	10	4	s+/Y_10	s+/Y_10_4
s+/Y	73	10	5	s+/Y_10	s+/Y_10_5
s+/Y	62	10	6	s+/Y_10	s+/Y_10_6
s+/Y	61	10	7	s+/Y_10	s+/Y_10_7
s+/Y	69	10	8	s+/Y_10	s+/Y_10_8
s+/Y	58	10	9	s+/Y_10	s+/Y_10_9
s+/Y	66	10	10	s+/Y_10	s+/Y_10_10
s+/Y	66	10	11	s+/Y_10	s+/Y_10_11
s+/Y	64	10	12	s+/Y_10	s+/Y_10_12
s+/Y	71	10	13	s+/Y_10	s+/Y_10_13
s+/Y	67	10	14	s+/Y_10	s+/Y_10_14
s+/Y	60	10	15	s+/Y_10	s+/Y_10_15
s+/Y	61	10	16	s+/Y_10	s+/Y_10_16
s+/Y	71	10	17	s+/Y_10	s+/Y_10_17
s+/Y	78	10	18	s+/Y_10	s+/Y_10_18
s+/Y	75	10	19	s+/Y_10	s+/Y_10_19
s+/Y	80	10	20	s+/Y_10	s+/Y_10_20
s+/Y	56	11	1	s+/Y_11	s+/Y_11_1
s+/Y	77	11	2	s+/Y_11	s+/Y_11_2
s+/Y	55	11	3	s+/Y_11	s+/Y_11_3
s+/Y	50	11	4	s+/Y_11	s+/Y_11_4
s+/Y	75	11	5	s+/Y_11	s+/Y_11_5
s+/Y	69	11	6	s+/Y_11	s+/Y_11_6
s+/Y	79	11	7	s+/Y_11	s+/Y_11_7
s+/Y	67	11	8	s+/Y_11	s+/Y_11_8
s+/Y	55	11	9	s+/Y_11	s+/Y_11_9
s+/Y	62	11	10	s+/Y_11	s+/Y_11_10
s+/Y	69	11	11	s+/Y_11	s+/Y_11_11
s+/Y	64	11	12	s+/Y_11	s+/Y_11_12
s+/Y	69	11	13	s+/Y_11	s+/Y_11_13
s+/Y	58	11	14	s+/Y_11	s+/Y_11_14
s+/Y	66	11	15	s+/Y_11	s+/Y_11_15
s+/Y	67	11	16	s+/Y_11	s+/Y_11_16
s+/Y	71	11	17	s+/Y_11	s+/Y_11_17
s+/Y	69	11	18	s+/Y_11	s+/Y_11_18
s+/Y	72	11	19	s+/Y_11	s+/Y_11_19
s+/Y	55	11	20	s+/Y_11	s+/Y_11_20
s+/Y	89	12	1	s+/Y_12	s+/Y_12_1
s+/Y	87	12	2	s+/Y_12	s+/Y_12_2
s+/Y	85	12	3	s+/Y_12	s+/Y_12_3
s+/Y	85	12	4	s+/Y_12	s+/Y_12_4
s+/Y	73	12	5	s+/Y_12	s+/Y_12_5
s+/Y	84	12	6	s+/Y_12	s+/Y_12_6
s+/Y	78	12	7	s+/Y_12	s+/Y_12_7
s+/Y	76	12	8	s+/Y_12	s+/Y_12_8
s+/Y	73	12	9	s+/Y_12	s+/Y_12_9
s+/Y	76	12	10	s+/Y_12	s+/Y_12_10
s+/Y	72	12	11	s+/Y_12	s+/Y_12_11
s+/Y	75	12	12	s+/Y_12	s+/Y_12_12
s+/Y	73	12	13	s+/Y_12	s+/Y_12_13
s+/Y	73	12	14	s+/Y_12	s+/Y_12_14
s+/Y	70	12	15	s+/Y_12	s+/Y_12_15
s+/Y	75	12	16	s+/Y_12	s+/Y_12_16
s+/Y	82	12	17	s+/Y_12	s+/Y_12_17
s+/Y	72	12	18	s+/Y_12	s+/Y_12_18
s+/Y	69	12	19	s+/Y_12	s+/Y_12_19
s+/Y	79	12	20	s+/Y_12	s+/Y_12_20
s+/Y	53	13	1	s+/Y_13	s+/Y_13_1
s+/Y	52	13	2	s+/Y_13	s+/Y_13_2
s+/Y	63	13	3	s+/Y_13	s+/Y_13_3
s+/Y	53	13	4	s+/Y_13	s+/Y_13_4
s+/Y	59	13	5	s+/Y_13	s+/Y_13_5
s+/Y	51	13	6	s+/Y_13	s+/Y_13_6
s+/Y	51	13	7	s+/Y_13	s+/Y_13_7
s+/Y	49	13	8	s+/Y_13	s+/Y_13_8
s+/Y	56	13	9	s+/Y_13	s+/Y_13_9
s+/Y	43	13	10	s+/Y_13	s+/Y_13_10
s+/Y	53	13	11	s+/Y_13	s+/Y_13_11
s+/Y	53	13	12	s+/Y_13	s+/Y_13_12
s+/Y	47	13	13	s+/Y_13	s+/Y_13_13
s+/Y	61	13	14	s+/Y_13	s+/Y_13_14
s+/Y	50	13	15	s+/Y_13	s+/Y_13_15
s+/Y	53	13	16	s+/Y_13	s+/Y_13_16
s+/Y	50	13	17	s+/Y_13	s+/Y_13_17
s+/Y	43	13	18	s+/Y_13	s+/Y_13_18
s+/Y	46	13	19	s+/Y_13	s+/Y_13_19
s+/Y	58	13	20	s+/Y_13	s+/Y_13_20
s+/Y	66	14	1	s+/Y_14	s+/Y_14_1
s+/Y	56	14	2	s+/Y_14	s+/Y_14_2
s+/Y	66	14	3	s+/Y_14	s+/Y_14_3
s+/Y	72	14	4	s+/Y_14	s+/Y_14_4
s+/Y	77	14	5	s+/Y_14	s+/Y_14_5
s+/Y	71	14	6	s+/Y_14	s+/Y_14_6
s+/Y	71	14	7	s+/Y_14	s+/Y_14_7
s+/Y	50	14	8	s+/Y_14	s+/Y_14_8
s+/Y	51	14	9	s+/Y_14	s+/Y_14_9
s+/Y	68	14	10	s+/Y_14	s+/Y_14_10
s+/Y	72	14	11	s+/Y_14	s+/Y_14_11
s+/Y	74	14	12	s+/Y_14	s+/Y_14_12
s+/Y	73	14	13	s+/Y_14	s+/Y_14_13
s+/Y	82	14	14	s+/Y_14	s+/Y_14_14
s+/Y	72	14	15	s+/Y_14	s+/Y_14_15
s+/Y	76	14	16	s+/Y_14	s+/Y_14_16
s+/Y	68	14	17	s+/Y_14	s+/Y_14_17
s+/Y	68	14	18	s+/Y_14	s+/Y_14_18
s+/Y	74	14	19	s+/Y_14	s+/Y_14_19
s+/Y	67	14	20	s+/Y_14	s+/Y_14_20
s+/Y	51	15	1	s+/Y_15	s+/Y_15_1
s+/Y	58	15	2	s+/Y_15	s+/Y_15_2
s+/Y	46	15	3	s+/Y_15	s+/Y_15_3
s+/Y	66	15	4	s+/Y_15	s+/Y_15_4
s+/Y	56	15	5	s+/Y_15	s+/Y_15_5
s+/Y	59	15	6	s+/Y_15	s+/Y_15_6
s+/Y	51	15	7	s+/Y_15	s+/Y_15_7
s+/Y	51	15	8	s+/Y_15	s+/Y_15_8
s+/Y	45	15	9	s+/Y_15	s+/Y_15_9
s+/Y	48	15	10	s+/Y_15	s+/Y_15_10
s+/Y	45	15	11	s+/Y_15	s+/Y_15_11
s+/Y	58	15	12	s+/Y_15	s+/Y_15_12
s+/Y	56	15	13	s+/Y_15	s+/Y_15_13
s+/Y	59	15	14	s+/Y_15	s+/Y_15_14
s+/Y	67	15	15	s+/Y_15	s+/Y_15_15
s+/Y	60	15	16	s+/Y_15	s+/Y_15_16
s+/Y	52	15	17	s+/Y_15	s+/Y_15_17
s+/Y	58	15	18	s+/Y_15	s+/Y_15_18
s+/Y	58	15	19	s+/Y_15	s+/Y_15_19
s+/Y	42	15	20	s+/Y_15	s+/Y_15_20
s/Y	30	1	1	s/Y_1	s/Y_1_1
s/Y	37	1	2	s/Y_1	s/Y_1_2
s/Y	25	1	3	s/Y_1	s/Y_1_3
s/Y	39	1	4	s/Y_1	s/Y_1_4
s/Y	39	1	5	s/Y_1	s/Y_1_5
s/Y	39	1	6	s/Y_1	s/Y_1_6
s/Y	36	1	7	s/Y_1	s/Y_1_7
s/Y	34	1	8	s/Y_1	s/Y_1_8
s/Y	29	1	9	s/Y_1	s/Y_1_9
s/Y	28	1	10	s/Y_1	s/Y_1_10
s/Y	30	1	11	s/Y_1	s/Y_1_11
s/Y	35	1	12	s/Y_1	s/Y_1_12
s/Y	43	1	13	s/Y_1	s/Y_1_13
s/Y	40	1	14	s/Y_1	s/Y_1_14
s/Y	39	1	15	s/Y_1	s/Y_1_15
s/Y	38	1	16	s/Y_1	s/Y_1_16
s/Y	35	1	17	s/Y_1	s/Y_1_17
s/Y	36	1	18	s/Y_1	s/Y_1_18
s/Y	32	1	19	s/Y_1	s/Y_1_19
s/Y	27	1	20	s/Y_1	s/Y_1_20
s/Y	36	2	1	s/Y_2	s/Y_2_1
s/Y	43	2	2	s/Y_2	s/Y_2_2
s/Y	39	2	3	s/Y_2	s/Y_2_3
s/Y	40	2	4	s/Y_2	s/Y_2_4
s/Y	40	2	5	s/Y_2	s/Y_2_5
s/Y	33	2	6	s/Y_2	s/Y_2_6
s/Y	41	2	7	s/Y_2	s/Y_2_7
s/Y	28	2	8	s/Y_2	s/Y_2_8
s/Y	32	2	9	s/Y_2	s/Y_2_9
s/Y	37	2	10	s/Y_2	s/Y_2_10
s/Y	37	2	11	s/Y_2	s/Y_2_11
s/Y	44	2	12	s/Y_2	s/Y_2_12
s/Y	38	2	13	s/Y_2	s/Y_2_13
s/Y	33	2	14	s/Y_2	s/Y_2_14
s/Y	31	2	15	s/Y_2	s/Y_2_15
s/Y	29	2	16	s/Y_2	s/Y_2_16
s/Y	39	2	17	s/Y_2	s/Y_2_17
s/Y	36	2	18	s/Y_2	s/Y_2_18
s/Y	35	2	19	s/Y_2	s/Y_2_19
s/Y	34	2	20	s/Y_2	s/Y_2_20
s/Y	33	3	1	s/Y_3	s/Y_3_1
s/Y	39	3	2	s/Y_3	s/Y_3_2
s/Y	33	3	3	s/Y_3	s/Y_3_3
s/Y	48	3	4	s/Y_3	s/Y_3_4
s/Y	35	3	5	s/Y_3	s/Y_3_5
s/Y	52	3	6	s/Y_3	s/Y_3_6
s/Y	50	3	7	s/Y_3	s/Y_3_7
s/Y	42	3	8	s/Y_3	s/Y_3_8
s/Y	39	3	9	s/Y_3	s/Y_3_9
s/Y	38	3	10	s/Y_3	s/Y_3_10
s/Y	38	3	11	s/Y_3	s/Y_3_11
s/Y	38	3	12	s/Y_3	s/Y_3_12
s/Y	39	3	13	s/Y_3	s/Y_3_13
s/Y	40	3	14	s/Y_3	s/Y_3_14
s/Y	42	3	15	s/Y_3	s/Y_3_15
s/Y	40	3	16	s/Y_3	s/Y_3_16
s/Y	48	3	17	s/Y_3	s/Y_3_17
s/Y	37	3	18	s/Y_3	s/Y_3_18
s/Y	41	3	19	s/Y_3	s/Y_3_19
s/Y	32	3	20	s/Y_3	s/Y_3_20
s/Y	45	4	1	s/Y_4	s/Y_4_1
s/Y	34	4	2	s/Y_4	s/Y_4_2
s/Y	36	4	3	s/Y_4	s/Y_4_3
s/Y	41	4	4	s/Y_4	s/Y_4_4
s/Y	51	4	5	s/Y_4	s/Y_4_5
s/Y	40	4	6	s/Y_4	s/Y_4_6
s/Y	46	4	7	s/Y_4	s/Y_4_7
s/Y	37	4	8	s/Y_4	s/Y_4_8
s/Y	49	4	9	s/Y_4	s/Y_4_9
s/Y	49	4	10	s/Y_4	s/Y_4_10
s/Y	45	4	11	s/Y_4	s/Y_4_11
s/Y	42	4	12	s/Y_4	s/Y_4_12
s/Y	56	4	13	s/Y_4	s/Y_4_13
s/Y	45	4	14	s/Y_4	s/Y_4_14
s/Y	43	4	15	s/Y_4	s/Y_4_15
s/Y	46	4	16	s/Y_4	s/Y_4_16
s/Y	46	4	17	s/Y_4	s/Y_4_17
s/Y	40	4	18	s/Y_4	s/Y_4_18
s/Y	47	4	19	s/Y_4	s/Y_4_19
s/Y	49	4	20	s/Y_4	s/Y_4_20
s/Y	35	5	1	s/Y_5	s/Y_5_1
s/Y	39	5	2	s/Y_5	s/Y_5_2
s/Y	50	5	3	s/Y_5	s/Y_5_3
s/Y	49	5	4	s/Y_5	s/Y_5_4
s/Y	49	5	5	s/Y_5	s/Y_5_5
s/Y	42	5	6	s/Y_5	s/Y_5_6
s/Y	48	5	7	s/Y_5	s/Y_5_7
s/Y	45	5	8	s/Y_5	s/Y_5_8
s/Y	43	5	9	s/Y_5	s/Y_5_9
s/Y	54	5	10	s/Y_5	s/Y_5_10
s/Y	43	5	11	s/Y_5	s/Y_5_11
s/Y	53	5	12	s/Y_5	s/Y_5_12
s/Y	31	5	13	s/Y_5	s/Y_5_13
s/Y	31	5	14	s/Y_5	s/Y_5_14
s/Y	25	5	15	s/Y_5	s/Y_5_15
s/Y	36	5	16	s/Y_5	s/Y_5_16
s/Y	43	5	17	s/Y_5	s/Y_5_17
s/Y	36	5	18	s/Y_5	s/Y_5_18
s/Y	42	5	19	s/Y_5	s/Y_5_19
s/Y	40	5	20	s/Y_5	s/Y_5_20
s/Y	29	6	1	s/Y_6	s/Y_6_1
s/Y	40	6	2	s/Y_6	s/Y_6_2
s/Y	36	6	3	s/Y_6	s/Y_6_3
s/Y	49	6	4	s/Y_6	s/Y_6_4
s/Y	47	6	5	s/Y_6	s/Y_6_5
s/Y	50	6	6	s/Y_6	s/Y_6_6
s/Y	45	6	7	s/Y_6	s/Y_6_7
s/Y	38	6	8	s/Y_6	s/Y_6_8
s/Y	46	6	9	s/Y_6	s/Y_6_9
s/Y	45	6	10	s/Y_6	s/Y_6_10
s/Y	39	6	11	s/Y_6	s/Y_6_11
s/Y	57	6	12	s/Y_6	s/Y_6_12
s/Y	42	6	13	s/Y_6	s/Y_6_13
s/Y	45	6	14	s/Y_6	s/Y_6_14
s/Y	34	6	15	s/Y_6	s/Y_6_15
s/Y	43	6	16	s/Y_6	s/Y_6_16
s/Y	36	6	17	s/Y_6	s/Y_6_17
s/Y	33	6	18	s/Y_6	s/Y_6_18
s/Y	43	6	19	s/Y_6	s/Y_6_19
s/Y	40	6	20	s/Y_6	s/Y_6_20
s/Y	38	7	1	s/Y_7	s/Y_7_1
s/Y	31	7	2	s/Y_7	s/Y_7_2
s/Y	33	7	3	s/Y_7	s/Y_7_3
s/Y	35	7	4	s/Y_7	s/Y_7_4
s/Y	34	7	5	s/Y_7	s/Y_7_5
s/Y	41	7	6	s/Y_7	s/Y_7_6
s/Y	37	7	7	s/Y_7	s/Y_7_7
s/Y	38	7	8	s/Y_7	s/Y_7_8
s/Y	44	7	9	s/Y_7	s/Y_7_9
s/Y	43	7	10	s/Y_7	s/Y_7_10
s/Y	51	7	11	s/Y_7	s/Y_7_11
s/Y	44	7	12	s/Y_7	s/Y_7_12
s/Y	33	7	13	s/Y_7	s/Y_7_13
s/Y	39	7	14	s/Y_7	s/Y_7_14
s/Y	31	7	15	s/Y_7	s/Y_7_15
s/Y	41	7	16	s/Y_7	s/Y_7_16
s/Y	27	7	17	s/Y_7	s/Y_7_17
s/Y	27	7	18	s/Y_7	s/Y_7_18
s/Y	31	7	19	s/Y_7	s/Y_7_19
s/Y	25	7	20	s/Y_7	s/Y_7_20
s/Y	37	8	1	s/Y_8	s/Y_8_1
s/Y	40	8	2	s/Y_8	s/Y_8_2
s/Y	39	8	3	s/Y_8	s/Y_8_3
s/Y	44	8	4	s/Y_8	s/Y_8_4
s/Y	38	8	5	s/Y_8	s/Y_8_5
s/Y	37	8	6	s/Y_8	s/Y_8_6
s/Y	31	8	7	s/Y_8	s/Y_8_7
s/Y	40	8	8	s/Y_8	s/Y_8_8
s/Y	36	8	9	s/Y_8	s/Y_8_9
s/Y	45	8	10	s/Y_8	s/Y_8_10
s/Y	52	8	11	s/Y_8	s/Y_8_11
s/Y	55	8	12	s/Y_8	s/Y_8_12
s/Y	33	8	13	s/Y_8	s/Y_8_13
s/Y	37	8	14	s/Y_8	s/Y_8_14
s/Y	36	8	15	s/Y_8	s/Y_8_15
s/Y	40	8	16	s/Y_8	s/Y_8_16
s/Y	45	8	17	s/Y_8	s/Y_8_17
s/Y	36	8	18	s/Y_8	s/Y_8_18
s/Y	42	8	19	s/Y_8	s/Y_8_19
s/Y	36	8	20	s/Y_8	s/Y_8_20
s/Y	33	9	1	s/Y_9	s/Y_9_1
s/Y	43	9	2	s/Y_9	s/Y_9_2
s/Y	39	9	3	s/Y_9	s/Y_9_3
s/Y	34	9	4	s/Y_9	s/Y_9_4
s/Y	46	9	5	s/Y_9	s/Y_9_5
s/Y	44	9	6	s/Y_9	s/Y_9_6
s/Y	47	9	7	s/Y_9	s/Y_9_7
s/Y	45	9	8	s/Y_9	s/Y_9_8
s/Y	45	9	9	s/Y_9	s/Y_9_9
s/Y	44	9	10	s/Y_9	s/Y_9_10
s/Y	43	9	11	s/Y_9	s/Y_9_11
s/Y	40	9	12	s/Y_9	s/Y_9_12
s/Y	47	9	13	s/Y_9	s/Y_9_13
s/Y	42	9	14	s/Y_9	s/Y_9_14
s/Y	48	9	15	s/Y_9	s/Y_9_15
s/Y	46	9	16	s/Y_9	s/Y_9_16
s/Y	46	9	17	s/Y_9	s/Y_9_17
s/Y	48	9	18	s/Y_9	s/Y_9_18
s/Y	45	9	19	s/Y_9	s/Y_9_19
s/Y	37	9	20	s/Y_9	s/Y_9_20
s/Y	43	10	1	s/Y_10	s/Y_10_1
s/Y	28	10	2	s/Y_10	s/Y_10_2
s/Y	42	10	3	s/Y_10	s/Y_10_3
s/Y	43	10	4	s/Y_10	s/Y_10_4
s/Y	44	10	5	s/Y_10	s/Y_10_5
s/Y	46	10	6	s/Y_10	s/Y_10_6
s/Y	35	10	7	s/Y_10	s/Y_10_7
s/Y	29	10	8	s/Y_10	s/Y_10_8
s/Y	34	10	9	s/Y_10	s/Y_10_9
s/Y	33	10	10	s/Y_10	s/Y_10_10
s/Y	38	10	11	s/Y_10	s/Y_10_11
s/Y	38	10	12	s/Y_10	s/Y_10_12
s/Y	36	10	13	s/Y_10	s/Y_10_13
s/Y	41	10	14	s/Y_10	s/Y_10_14
s/Y	26	10	15	s/Y_10	s/Y_10_15
s/Y	36	10	16	s/Y_10	s/Y_10_16
s/Y	31	10	17	s/Y_10	s/Y_10_17
s/Y	36	10	18	s/Y_10	s/Y_10_18
s/Y	33	10	19	s/Y_10	s/Y_10_19
s/Y	37	10	20	s/Y_10	s/Y_10_20
s/Y	30	11	1	s/Y_11	s/Y_11_1
s/Y	37	11	2	s/Y_11	s/Y_11_2
s/Y	37	11	3	s/Y_11	s/Y_11_3
s/Y	27	11	4	s/Y_11	s/Y_11_4
s/Y	38	11	5	s/Y_11	s/Y_11_5
s/Y	29	11	6	s/Y_11	s/Y_11_6
s/Y	37	11	7	s/Y_11	s/Y_11_7
s/Y	40	11	8	s/Y_11	s/Y_11_8
s/Y	44	11	9	s/Y_11	s/Y_11_9
s/Y	40	11	10	s/Y_11	s/Y_11_10
s/Y	48	11	11	s/Y_11	s/Y_11_11
s/Y	39	11	12	s/Y_11	s/Y_11_12
s/Y	43	11	13	s/Y_11	s/Y_11_13
s/Y	37	11	14	s/Y_11	s/Y_11_14
s/Y	42	11	15	s/Y_11	s/Y_11_15
s/Y	39	11	16	s/Y_11	s/Y_11_16
s/Y	47	11	17	s/Y_11	s/Y_11_17
s/Y	49	11	18	s/Y_11	s/Y_11_18
s/Y	42	11	19	s/Y_11	s/Y_11_19
s/Y	43	11	20	s/Y_11	s/Y_11_20
s/Y	38	12	1	s/Y_12	s/Y_12_1
s/Y	26	12	2	s/Y_12	s/Y_12_2
s/Y	34	12	3	s/Y_12	s/Y_12_3
s/Y	27	12	4	s/Y_12	s/Y_12_4
s/Y	37	12	5	s/Y_12	s/Y_12_5
s/Y	30	12	6	s/Y_12	s/Y_12_6
s/Y	39	12	7	s/Y_12	s/Y_12_7
s/Y	32	12	8	s/Y_12	s/Y_12_8
s/Y	37	12	9	s/Y_12	s/Y_12_9
s/Y	37	12	10	s/Y_12	s/Y_12_10
s/Y	34	12	11	s/Y_12	s/Y_12_11
s/Y	46	12	12	s/Y_12	s/Y_12_12
s/Y	41	12	13	s/Y_12	s/Y_12_13
s/Y	40	12	14	s/Y_12	s/Y_12_14
s/Y	35	12	15	s/Y_12	s/Y_12_15
s/Y	40	12	16	s/Y_12	s/Y_12_16
s/Y	28	12	17	s/Y_12	s/Y_12_17
s/Y	36	12	18	s/Y_12	s/Y_12_18
s/Y	41	12	19	s/Y_12	s/Y_12_19
s/Y	35	12	20	s/Y_12	s/Y_12_20
s/Y	32	13	1	s/Y_13	s/Y_13_1
s/Y	30	13	2	s/Y_13	s/Y_13_2
s/Y	37	13	3	s/Y_13	s/Y_13_3
s/Y	39	13	4	s/Y_13	s/Y_13_4
s/Y	31	13	5	s/Y_13	s/Y_13_5
s/Y	38	13	6	s/Y_13	s/Y_13_6
s/Y	31	13	7	s/Y_13	s/Y_13_7
s/Y	25	13	8	s/Y_13	s/Y_13_8
s/Y	31	13	9	s/Y_13	s/Y_13_9
s/Y	28	13	10	s/Y_13	s/Y_13_10
s/Y	37	13	11	s/Y_13	s/Y_13_11
s/Y	29	13	12	s/Y_13	s/Y_13_12
s/Y	35	13	13	s/Y_13	s/Y_13_13
s/Y	29	13	14	s/Y_13	s/Y_13_14
s/Y	30	13	15	s/Y_13	s/Y_13_15
s/Y	29	13	16	s/Y_13	s/Y_13_16
s/Y	31	13	17	s/Y_13	s/Y_13_17
s/Y	36	13	18	s/Y_13	s/Y_13_18
s/Y	36	13	19	s/Y_13	s/Y_13_19
s/Y	30	13	20	s/Y_13	s/Y_13_20
s/Y	33	14	1	s/Y_14	s/Y_14_1
s/Y	32	14	2	s/Y_14	s/Y_14_2
s/Y	27	14	3	s/Y_14	s/Y_14_3
s/Y	28	14	4	s/Y_14	s/Y_14_4
s/Y	22	14	5	s/Y_14	s/Y_14_5
s/Y	23	14	6	s/Y_14	s/Y_14_6
s/Y	27	14	7	s/Y_14	s/Y_14_7
s/Y	29	14	8	s/Y_14	s/Y_14_8
s/Y	27	14	9	s/Y_14	s/Y_14_9
s/Y	34	14	10	s/Y_14	s/Y_14_10
s/Y	28	14	11	s/Y_14	s/Y_14_11
s/Y	29	14	12	s/Y_14	s/Y_14_12
s/Y	26	14	13	s/Y_14	s/Y_14_13
s/Y	28	14	14	s/Y_14	s/Y_14_14
s/Y	37	14	15	s/Y_14	s/Y_14_15
s/Y	26	14	16	s/Y_14	s/Y_14_16
s/Y	29	14	17	s/Y_14	s/Y_14_17
s/Y	30	14	18	s/Y_14	s/Y_14_18
s/Y	27	14	19	s/Y_14	s/Y_14_19
s/Y	29	14	20	s/Y_14	s/Y_14_20
s/Y	40	15	1	s/Y_15	s/Y_15_1
s/Y	35	15	2	s/Y_15	s/Y_15_2
s/Y	32	15	3	s/Y_15	s/Y_15_3
s/Y	28	15	4	s/Y_15	s/Y_15_4
s/Y	30	15	5	s/Y_15	s/Y_15_5
s/Y	33	15	6	s/Y_15	s/Y_15_6
s/Y	28	15	7	s/Y_15	s/Y_15_7
s/Y	39	15	8	s/Y_15	s/Y_15_8
s/Y	36	15	9	s/Y_15	s/Y_15_9
s/Y	37	15	10	s/Y_15	s/Y_15_10
s/Y	41	15	11	s/Y_15	s/Y_15_11
s/Y	34	15	12	s/Y_15	s/Y_15_12
s/Y	36	15	13	s/Y_15	s/Y_15_13
s/Y	37	15	14	s/Y_15	s/Y_15_14
s/Y	36	15	15	s/Y_15	s/Y_15_15
s/Y	35	15	16	s/Y_15	s/Y_15_16
s/Y	31	15	17	s/Y_15	s/Y_15_17
s/Y	34	15	18	s/Y_15	s/Y_15_18
s/Y	36	15	19	s/Y_15	s/Y_15_19
s/Y	22	15	20	s/Y_15	s/Y_15_20
s/Y; Dp(1;3)DC267	38	1	1	s/Y; Dp(1;3)DC267_1	s/Y; Dp(1;3)DC267_1_1
s/Y; Dp(1;3)DC267	39	1	2	s/Y; Dp(1;3)DC267_1	s/Y; Dp(1;3)DC267_1_2
s/Y; Dp(1;3)DC267	30	1	3	s/Y; Dp(1;3)DC267_1	s/Y; Dp(1;3)DC267_1_3
s/Y; Dp(1;3)DC267	42	1	4	s/Y; Dp(1;3)DC267_1	s/Y; Dp(1;3)DC267_1_4
s/Y; Dp(1;3)DC267	39	1	5	s/Y; Dp(1;3)DC267_1	s/Y; Dp(1;3)DC267_1_5
s/Y; Dp(1;3)DC267	30	1	6	s/Y; Dp(1;3)DC267_1	s/Y; Dp(1;3)DC267_1_6
s/Y; Dp(1;3)DC267	33	1	7	s/Y; Dp(1;3)DC267_1	s/Y; Dp(1;3)DC267_1_7
s/Y; Dp(1;3)DC267	29	1	8	s/Y; Dp(1;3)DC267_1	s/Y; Dp(1;3)DC267_1_8
s/Y; Dp(1;3)DC267	31	1	9	s/Y; Dp(1;3)DC267_1	s/Y; Dp(1;3)DC267_1_9
s/Y; Dp(1;3)DC267	36	1	10	s/Y; Dp(1;3)DC267_1	s/Y; Dp(1;3)DC267_1_10
s/Y; Dp(1;3)DC267	38	1	11	s/Y; Dp(1;3)DC267_1	s/Y; Dp(1;3)DC267_1_11
s/Y; Dp(1;3)DC267	38	1	12	s/Y; Dp(1;3)DC267_1	s/Y; Dp(1;3)DC267_1_12
s/Y; Dp(1;3)DC267	32	1	13	s/Y; Dp(1;3)DC267_1	s/Y; Dp(1;3)DC267_1_13
s/Y; Dp(1;3)DC267	33	1	14	s/Y; Dp(1;3)DC267_1	s/Y; Dp(1;3)DC267_1_14
s/Y; Dp(1;3)DC267	33	1	15	s/Y; Dp(1;3)DC267_1	s/Y; Dp(1;3)DC267_1_15
s/Y; Dp(1;3)DC267	37	1	16	s/Y; Dp(1;3)DC267_1	s/Y; Dp(1;3)DC267_1_16
s/Y; Dp(1;3)DC267	34	1	17	s/Y; Dp(1;3)DC267_1	s/Y; Dp(1;3)DC267_1_17
s/Y; Dp(1;3)DC267	35	1	18	s/Y; Dp(1;3)DC267_1	s/Y; Dp(1;3)DC267_1_18
s/Y; Dp(1;3)DC267	28	1	19	s/Y; Dp(1;3)DC267_1	s/Y; Dp(1;3)DC267_1_19
s/Y; Dp(1;3)DC267	34	1	20	s/Y; Dp(1;3)DC267_1	s/Y; Dp(1;3)DC267_1_20
s/Y; Dp(1;3)DC267	39	2	1	s/Y; Dp(1;3)DC267_2	s/Y; Dp(1;3)DC267_2_1
s/Y; Dp(1;3)DC267	28	2	2	s/Y; Dp(1;3)DC267_2	s/Y; Dp(1;3)DC267_2_2
s/Y; Dp(1;3)DC267	37	2	3	s/Y; Dp(1;3)DC267_2	s/Y; Dp(1;3)DC267_2_3
s/Y; Dp(1;3)DC267	37	2	4	s/Y; Dp(1;3)DC267_2	s/Y; Dp(1;3)DC267_2_4
s/Y; Dp(1;3)DC267	48	2	5	s/Y; Dp(1;3)DC267_2	s/Y; Dp(1;3)DC267_2_5
s/Y; Dp(1;3)DC267	36	2	6	s/Y; Dp(1;3)DC267_2	s/Y; Dp(1;3)DC267_2_6
s/Y; Dp(1;3)DC267	39	2	7	s/Y; Dp(1;3)DC267_2	s/Y; Dp(1;3)DC267_2_7
s/Y; Dp(1;3)DC267	37	2	8	s/Y; Dp(1;3)DC267_2	s/Y; Dp(1;3)DC267_2_8
s/Y; Dp(1;3)DC267	46	2	9	s/Y; Dp(1;3)DC267_2	s/Y; Dp(1;3)DC267_2_9
s/Y; Dp(1;3)DC267	38	2	10	s/Y; Dp(1;3)DC267_2	s/Y; Dp(1;3)DC267_2_10
s/Y; Dp(1;3)DC267	54	2	11	s/Y; Dp(1;3)DC267_2	s/Y; Dp(1;3)DC267_2_11
s/Y; Dp(1;3)DC267	62	2	12	s/Y; Dp(1;3)DC267_2	s/Y; Dp(1;3)DC267_2_12
s/Y; Dp(1;3)DC267	43	2	13	s/Y; Dp(1;3)DC267_2	s/Y; Dp(1;3)DC267_2_13
s/Y; Dp(1;3)DC267	49	2	14	s/Y; Dp(1;3)DC267_2	s/Y; Dp(1;3)DC267_2_14
s/Y; Dp(1;3)DC267	47	2	15	s/Y; Dp(1;3)DC267_2	s/Y; Dp(1;3)DC267_2_15
s/Y; Dp(1;3)DC267	43	2	16	s/Y; Dp(1;3)DC267_2	s/Y; Dp(1;3)DC267_2_16
s/Y; Dp(1;3)DC267	35	2	17	s/Y; Dp(1;3)DC267_2	s/Y; Dp(1;3)DC267_2_17
s/Y; Dp(1;3)DC267	29	2	18	s/Y; Dp(1;3)DC267_2	s/Y; Dp(1;3)DC267_2_18
s/Y; Dp(1;3)DC267	45	2	19	s/Y; Dp(1;3)DC267_2	s/Y; Dp(1;3)DC267_2_19
s/Y; Dp(1;3)DC267	49	2	20	s/Y; Dp(1;3)DC267_2	s/Y; Dp(1;3)DC267_2_20
s/Y; Dp(1;3)DC267	56	3	1	s/Y; Dp(1;3)DC267_3	s/Y; Dp(1;3)DC267_3_1
s/Y; Dp(1;3)DC267	42	3	2	s/Y; Dp(1;3)DC267_3	s/Y; Dp(1;3)DC267_3_2
s/Y; Dp(1;3)DC267	41	3	3	s/Y; Dp(1;3)DC267_3	s/Y; Dp(1;3)DC267_3_3
s/Y; Dp(1;3)DC267	45	3	4	s/Y; Dp(1;3)DC267_3	s/Y; Dp(1;3)DC267_3_4
s/Y; Dp(1;3)DC267	60	3	5	s/Y; Dp(1;3)DC267_3	s/Y; Dp(1;3)DC267_3_5
s/Y; Dp(1;3)DC267	56	3	6	s/Y; Dp(1;3)DC267_3	s/Y; Dp(1;3)DC267_3_6
s/Y; Dp(1;3)DC267	58	3	7	s/Y; Dp(1;3)DC267_3	s/Y; Dp(1;3)DC267_3_7
s/Y; Dp(1;3)DC267	41	3	8	s/Y; Dp(1;3)DC267_3	s/Y; Dp(1;3)DC267_3_8
s/Y; Dp(1;3)DC267	52	3	9	s/Y; Dp(1;3)DC267_3	s/Y; Dp(1;3)DC267_3_9
s/Y; Dp(1;3)DC267	45	3	10	s/Y; Dp(1;3)DC267_3	s/Y; Dp(1;3)DC267_3_10
s/Y; Dp(1;3)DC267	44	3	11	s/Y; Dp(1;3)DC267_3	s/Y; Dp(1;3)DC267_3_11
s/Y; Dp(1;3)DC267	67	3	12	s/Y; Dp(1;3)DC267_3	s/Y; Dp(1;3)DC267_3_12
s/Y; Dp(1;3)DC267	60	3	13	s/Y; Dp(1;3)DC267_3	s/Y; Dp(1;3)DC267_3_13
s/Y; Dp(1;3)DC267	41	3	14	s/Y; Dp(1;3)DC267_3	s/Y; Dp(1;3)DC267_3_14
s/Y; Dp(1;3)DC267	45	3	15	s/Y; Dp(1;3)DC267_3	s/Y; Dp(1;3)DC267_3_15
s/Y; Dp(1;3)DC267	41	3	16	s/Y; Dp(1;3)DC267_3	s/Y; Dp(1;3)DC267_3_16
s/Y; Dp(1;3)DC267	38	3	17	s/Y; Dp(1;3)DC267_3	s/Y; Dp(1;3)DC267_3_17
s/Y; Dp(1;3)DC267	51	3	18	s/Y; Dp(1;3)DC267_3	s/Y; Dp(1;3)DC267_3_18
s/Y; Dp(1;3)DC267	50	3	19	s/Y; Dp(1;3)DC267_3	s/Y; Dp(1;3)DC267_3_19
s/Y; Dp(1;3)DC267	46	3	20	s/Y; Dp(1;3)DC267_3	s/Y; Dp(1;3)DC267_3_20
s/Y; Dp(1;3)DC267	44	4	1	s/Y; Dp(1;3)DC267_4	s/Y; Dp(1;3)DC267_4_1
s/Y; Dp(1;3)DC267	43	4	2	s/Y; Dp(1;3)DC267_4	s/Y; Dp(1;3)DC267_4_2
s/Y; Dp(1;3)DC267	47	4	3	s/Y; Dp(1;3)DC267_4	s/Y; Dp(1;3)DC267_4_3
s/Y; Dp(1;3)DC267	42	4	4	s/Y; Dp(1;3)DC267_4	s/Y; Dp(1;3)DC267_4_4
s/Y; Dp(1;3)DC267	33	4	5	s/Y; Dp(1;3)DC267_4	s/Y; Dp(1;3)DC267_4_5
s/Y; Dp(1;3)DC267	40	4	6	s/Y; Dp(1;3)DC267_4	s/Y; Dp(1;3)DC267_4_6
s/Y; Dp(1;3)DC267	38	4	7	s/Y; Dp(1;3)DC267_4	s/Y; Dp(1;3)DC267_4_7
s/Y; Dp(1;3)DC267	43	4	8	s/Y; Dp(1;3)DC267_4	s/Y; Dp(1;3)DC267_4_8
s/Y; Dp(1;3)DC267	36	4	9	s/Y; Dp(1;3)DC267_4	s/Y; Dp(1;3)DC267_4_9
s/Y; Dp(1;3)DC267	42	4	10	s/Y; Dp(1;3)DC267_4	s/Y; Dp(1;3)DC267_4_10
s/Y; Dp(1;3)DC267	43	4	11	s/Y; Dp(1;3)DC267_4	s/Y; Dp(1;3)DC267_4_11
s/Y; Dp(1;3)DC267	42	4	12	s/Y; Dp(1;3)DC267_4	s/Y; Dp(1;3)DC267_4_12
s/Y; Dp(1;3)DC267	43	4	13	s/Y; Dp(1;3)DC267_4	s/Y; Dp(1;3)DC267_4_13
s/Y; Dp(1;3)DC267	45	4	14	s/Y; Dp(1;3)DC267_4	s/Y; Dp(1;3)DC267_4_14
s/Y; Dp(1;3)DC267	36	4	15	s/Y; Dp(1;3)DC267_4	s/Y; Dp(1;3)DC267_4_15
s/Y; Dp(1;3)DC267	60	4	16	s/Y; Dp(1;3)DC267_4	s/Y; Dp(1;3)DC267_4_16
s/Y; Dp(1;3)DC267	41	4	17	s/Y; Dp(1;3)DC267_4	s/Y; Dp(1;3)DC267_4_17
s/Y; Dp(1;3)DC267	38	4	18	s/Y; Dp(1;3)DC267_4	s/Y; Dp(1;3)DC267_4_18
s/Y; Dp(1;3)DC267	43	4	19	s/Y; Dp(1;3)DC267_4	s/Y; Dp(1;3)DC267_4_19
s/Y; Dp(1;3)DC267	54	4	20	s/Y; Dp(1;3)DC267_4	s/Y; Dp(1;3)DC267_4_20
s/Y; Dp(1;3)DC267	41	5	1	s/Y; Dp(1;3)DC267_5	s/Y; Dp(1;3)DC267_5_1
s/Y; Dp(1;3)DC267	45	5	2	s/Y; Dp(1;3)DC267_5	s/Y; Dp(1;3)DC267_5_2
s/Y; Dp(1;3)DC267	46	5	3	s/Y; Dp(1;3)DC267_5	s/Y; Dp(1;3)DC267_5_3
s/Y; Dp(1;3)DC267	50	5	4	s/Y; Dp(1;3)DC267_5	s/Y; Dp(1;3)DC267_5_4
s/Y; Dp(1;3)DC267	44	5	5	s/Y; Dp(1;3)DC267_5	s/Y; Dp(1;3)DC267_5_5
s/Y; Dp(1;3)DC267	42	5	6	s/Y; Dp(1;3)DC267_5	s/Y; Dp(1;3)DC267_5_6
s/Y; Dp(1;3)DC267	44	5	7	s/Y; Dp(1;3)DC267_5	s/Y; Dp(1;3)DC267_5_7
s/Y; Dp(1;3)DC267	44	5	8	s/Y; Dp(1;3)DC267_5	s/Y; Dp(1;3)DC267_5_8
s/Y; Dp(1;3)DC267	42	5	9	s/Y; Dp(1;3)DC267_5	s/Y; Dp(1;3)DC267_5_9
s/Y; Dp(1;3)DC267	43	5	10	s/Y; Dp(1;3)DC267_5	s/Y; Dp(1;3)DC267_5_10
s/Y; Dp(1;3)DC267	52	5	11	s/Y; Dp(1;3)DC267_5	s/Y; Dp(1;3)DC267_5_11
s/Y; Dp(1;3)DC267	52	5	12	s/Y; Dp(1;3)DC267_5	s/Y; Dp(1;3)DC267_5_12
s/Y; Dp(1;3)DC267	47	5	13	s/Y; Dp(1;3)DC267_5	s/Y; Dp(1;3)DC267_5_13
s/Y; Dp(1;3)DC267	55	5	14	s/Y; Dp(1;3)DC267_5	s/Y; Dp(1;3)DC267_5_14
s/Y; Dp(1;3)DC267	40	5	15	s/Y; Dp(1;3)DC267_5	s/Y; Dp(1;3)DC267_5_15
s/Y; Dp(1;3)DC267	35	5	16	s/Y; Dp(1;3)DC267_5	s/Y; Dp(1;3)DC267_5_16
s/Y; Dp(1;3)DC267	43	5	17	s/Y; Dp(1;3)DC267_5	s/Y; Dp(1;3)DC267_5_17
s/Y; Dp(1;3)DC267	40	5	18	s/Y; Dp(1;3)DC267_5	s/Y; Dp(1;3)DC267_5_18
s/Y; Dp(1;3)DC267	38	5	19	s/Y; Dp(1;3)DC267_5	s/Y; Dp(1;3)DC267_5_19
s/Y; Dp(1;3)DC267	42	5	20	s/Y; Dp(1;3)DC267_5	s/Y; Dp(1;3)DC267_5_20
s/Y; Dp(1;3)DC267	38	6	1	s/Y; Dp(1;3)DC267_6	s/Y; Dp(1;3)DC267_6_1
s/Y; Dp(1;3)DC267	45	6	2	s/Y; Dp(1;3)DC267_6	s/Y; Dp(1;3)DC267_6_2
s/Y; Dp(1;3)DC267	41	6	3	s/Y; Dp(1;3)DC267_6	s/Y; Dp(1;3)DC267_6_3
s/Y; Dp(1;3)DC267	33	6	4	s/Y; Dp(1;3)DC267_6	s/Y; Dp(1;3)DC267_6_4
s/Y; Dp(1;3)DC267	39	6	5	s/Y; Dp(1;3)DC267_6	s/Y; Dp(1;3)DC267_6_5
s/Y; Dp(1;3)DC267	43	6	6	s/Y; Dp(1;3)DC267_6	s/Y; Dp(1;3)DC267_6_6
s/Y; Dp(1;3)DC267	41	6	7	s/Y; Dp(1;3)DC267_6	s/Y; Dp(1;3)DC267_6_7
s/Y; Dp(1;3)DC267	40	6	8	s/Y; Dp(1;3)DC267_6	s/Y; Dp(1;3)DC267_6_8
s/Y; Dp(1;3)DC267	45	6	9	s/Y; Dp(1;3)DC267_6	s/Y; Dp(1;3)DC267_6_9
s/Y; Dp(1;3)DC267	36	6	10	s/Y; Dp(1;3)DC267_6	s/Y; Dp(1;3)DC267_6_10
s/Y; Dp(1;3)DC267	42	6	11	s/Y; Dp(1;3)DC267_6	s/Y; Dp(1;3)DC267_6_11
s/Y; Dp(1;3)DC267	45	6	12	s/Y; Dp(1;3)DC267_6	s/Y; Dp(1;3)DC267_6_12
s/Y; Dp(1;3)DC267	49	6	13	s/Y; Dp(1;3)DC267_6	s/Y; Dp(1;3)DC267_6_13
s/Y; Dp(1;3)DC267	43	6	14	s/Y; Dp(1;3)DC267_6	s/Y; Dp(1;3)DC267_6_14
s/Y; Dp(1;3)DC267	37	6	15	s/Y; Dp(1;3)DC267_6	s/Y; Dp(1;3)DC267_6_15
s/Y; Dp(1;3)DC267	40	6	16	s/Y; Dp(1;3)DC267_6	s/Y; Dp(1;3)DC267_6_16
s/Y; Dp(1;3)DC267	49	6	17	s/Y; Dp(1;3)DC267_6	s/Y; Dp(1;3)DC267_6_17
s/Y; Dp(1;3)DC267	45	6	18	s/Y; Dp(1;3)DC267_6	s/Y; Dp(1;3)DC267_6_18
s/Y; Dp(1;3)DC267	53	6	19	s/Y; Dp(1;3)DC267_6	s/Y; Dp(1;3)DC267_6_19
s/Y; Dp(1;3)DC267	48	6	20	s/Y; Dp(1;3)DC267_6	s/Y; Dp(1;3)DC267_6_20
s/Y; Dp(1;3)DC267	33	7	1	s/Y; Dp(1;3)DC267_7	s/Y; Dp(1;3)DC267_7_1
s/Y; Dp(1;3)DC267	32	7	2	s/Y; Dp(1;3)DC267_7	s/Y; Dp(1;3)DC267_7_2
s/Y; Dp(1;3)DC267	39	7	3	s/Y; Dp(1;3)DC267_7	s/Y; Dp(1;3)DC267_7_3
s/Y; Dp(1;3)DC267	34	7	4	s/Y; Dp(1;3)DC267_7	s/Y; Dp(1;3)DC267_7_4
s/Y; Dp(1;3)DC267	35	7	5	s/Y; Dp(1;3)DC267_7	s/Y; Dp(1;3)DC267_7_5
s/Y; Dp(1;3)DC267	37	7	6	s/Y; Dp(1;3)DC267_7	s/Y; Dp(1;3)DC267_7_6
s/Y; Dp(1;3)DC267	37	7	7	s/Y; Dp(1;3)DC267_7	s/Y; Dp(1;3)DC267_7_7
s/Y; Dp(1;3)DC267	32	7	8	s/Y; Dp(1;3)DC267_7	s/Y; Dp(1;3)DC267_7_8
s/Y; Dp(1;3)DC267	41	7	9	s/Y; Dp(1;3)DC267_7	s/Y; Dp(1;3)DC267_7_9
s/Y; Dp(1;3)DC267	35	7	10	s/Y; Dp(1;3)DC267_7	s/Y; Dp(1;3)DC267_7_10
s/Y; Dp(1;3)DC267	40	7	11	s/Y; Dp(1;3)DC267_7	s/Y; Dp(1;3)DC267_7_11
s/Y; Dp(1;3)DC267	40	7	12	s/Y; Dp(1;3)DC267_7	s/Y; Dp(1;3)DC267_7_12
s/Y; Dp(1;3)DC267	49	7	13	s/Y; Dp(1;3)DC267_7	s/Y; Dp(1;3)DC267_7_13
s/Y; Dp(1;3)DC267	38	7	14	s/Y; Dp(1;3)DC267_7	s/Y; Dp(1;3)DC267_7_14
s/Y; Dp(1;3)DC267	37	7	15	s/Y; Dp(1;3)DC267_7	s/Y; Dp(1;3)DC267_7_15
s/Y; Dp(1;3)DC267	38	7	16	s/Y; Dp(1;3)DC267_7	s/Y; Dp(1;3)DC267_7_16
s/Y; Dp(1;3)DC267	37	7	17	s/Y; Dp(1;3)DC267_7	s/Y; Dp(1;3)DC267_7_17
s/Y; Dp(1;3)DC267	36	7	18	s/Y; Dp(1;3)DC267_7	s/Y; Dp(1;3)DC267_7_18
s/Y; Dp(1;3)DC267	36	7	19	s/Y; Dp(1;3)DC267_7	s/Y; Dp(1;3)DC267_7_19
s/Y; Dp(1;3)DC267	35	7	20	s/Y; Dp(1;3)DC267_7	s/Y; Dp(1;3)DC267_7_20
s/Y; Dp(1;3)DC267	29	8	1	s/Y; Dp(1;3)DC267_8	s/Y; Dp(1;3)DC267_8_1
s/Y; Dp(1;3)DC267	45	8	2	s/Y; Dp(1;3)DC267_8	s/Y; Dp(1;3)DC267_8_2
s/Y; Dp(1;3)DC267	36	8	3	s/Y; Dp(1;3)DC267_8	s/Y; Dp(1;3)DC267_8_3
s/Y; Dp(1;3)DC267	53	8	4	s/Y; Dp(1;3)DC267_8	s/Y; Dp(1;3)DC267_8_4
s/Y; Dp(1;3)DC267	44	8	5	s/Y; Dp(1;3)DC267_8	s/Y; Dp(1;3)DC267_8_5
s/Y; Dp(1;3)DC267	41	8	6	s/Y; Dp(1;3)DC267_8	s/Y; Dp(1;3)DC267_8_6
s/Y; Dp(1;3)DC267	42	8	7	s/Y; Dp(1;3)DC267_8	s/Y; Dp(1;3)DC267_8_7
s/Y; Dp(1;3)DC267	44	8	8	s/Y; Dp(1;3)DC267_8	s/Y; Dp(1;3)DC267_8_8
s/Y; Dp(1;3)DC267	41	8	9	s/Y; Dp(1;3)DC267_8	s/Y; Dp(1;3)DC267_8_9
s/Y; Dp(1;3)DC267	38	8	10	s/Y; Dp(1;3)DC267_8	s/Y; Dp(1;3)DC267_8_10
s/Y; Dp(1;3)DC267	42	8	11	s/Y; Dp(1;3)DC267_8	s/Y; Dp(1;3)DC267_8_11
s/Y; Dp(1;3)DC267	44	8	12	s/Y; Dp(1;3)DC267_8	s/Y; Dp(1;3)DC267_8_12
s/Y; Dp(1;3)DC267	51	8	13	s/Y; Dp(1;3)DC267_8	s/Y; Dp(1;3)DC267_8_13
s/Y; Dp(1;3)DC267	49	8	14	s/Y; Dp(1;3)DC267_8	s/Y; Dp(1;3)DC267_8_14
s/Y; Dp(1;3)DC267	40	8	15	s/Y; Dp(1;3)DC267_8	s/Y; Dp(1;3)DC267_8_15
s/Y; Dp(1;3)DC267	39	8	16	s/Y; Dp(1;3)DC267_8	s/Y; Dp(1;3)DC267_8_16
s/Y; Dp(1;3)DC267	41	8	17	s/Y; Dp(1;3)DC267_8	s/Y; Dp(1;3)DC267_8_17
s/Y; Dp(1;3)DC267	40	8	18	s/Y; Dp(1;3)DC267_8	s/Y; Dp(1;3)DC267_8_18
s/Y; Dp(1;3)DC267	32	8	19	s/Y; Dp(1;3)DC267_8	s/Y; Dp(1;3)DC267_8_19
s/Y; Dp(1;3)DC267	41	8	20	s/Y; Dp(1;3)DC267_8	s/Y; Dp(1;3)DC267_8_20
s/Y; Dp(1;3)DC267	32	9	1	s/Y; Dp(1;3)DC267_9	s/Y; Dp(1;3)DC267_9_1
s/Y; Dp(1;3)DC267	36	9	2	s/Y; Dp(1;3)DC267_9	s/Y; Dp(1;3)DC267_9_2
s/Y; Dp(1;3)DC267	33	9	3	s/Y; Dp(1;3)DC267_9	s/Y; Dp(1;3)DC267_9_3
s/Y; Dp(1;3)DC267	41	9	4	s/Y; Dp(1;3)DC267_9	s/Y; Dp(1;3)DC267_9_4
s/Y; Dp(1;3)DC267	47	9	5	s/Y; Dp(1;3)DC267_9	s/Y; Dp(1;3)DC267_9_5
s/Y; Dp(1;3)DC267	43	9	6	s/Y; Dp(1;3)DC267_9	s/Y; Dp(1;3)DC267_9_6
s/Y; Dp(1;3)DC267	37	9	7	s/Y; Dp(1;3)DC267_9	s/Y; Dp(1;3)DC267_9_7
s/Y; Dp(1;3)DC267	40	9	8	s/Y; Dp(1;3)DC267_9	s/Y; Dp(1;3)DC267_9_8
s/Y; Dp(1;3)DC267	45	9	9	s/Y; Dp(1;3)DC267_9	s/Y; Dp(1;3)DC267_9_9
s/Y; Dp(1;3)DC267	34	9	10	s/Y; Dp(1;3)DC267_9	s/Y; Dp(1;3)DC267_9_10
s/Y; Dp(1;3)DC267	46	9	11	s/Y; Dp(1;3)DC267_9	s/Y; Dp(1;3)DC267_9_11
s/Y; Dp(1;3)DC267	39	9	12	s/Y; Dp(1;3)DC267_9	s/Y; Dp(1;3)DC267_9_12
s/Y; Dp(1;3)DC267	38	9	13	s/Y; Dp(1;3)DC267_9	s/Y; Dp(1;3)DC267_9_13
s/Y; Dp(1;3)DC267	39	9	14	s/Y; Dp(1;3)DC267_9	s/Y; Dp(1;3)DC267_9_14
s/Y; Dp(1;3)DC267	46	9	15	s/Y; Dp(1;3)DC267_9	s/Y; Dp(1;3)DC267_9_15
s/Y; Dp(1;3)DC267	38	9	16	s/Y; Dp(1;3)DC267_9	s/Y; Dp(1;3)DC267_9_16
s/Y; Dp(1;3)DC267	48	9	17	s/Y; Dp(1;3)DC267_9	s/Y; Dp(1;3)DC267_9_17
s/Y; Dp(1;3)DC267	48	9	18	s/Y; Dp(1;3)DC267_9	s/Y; Dp(1;3)DC267_9_18
s/Y; Dp(1;3)DC267	34	9	19	s/Y; Dp(1;3)DC267_9	s/Y; Dp(1;3)DC267_9_19
s/Y; Dp(1;3)DC267	33	9	20	s/Y; Dp(1;3)DC267_9	s/Y; Dp(1;3)DC267_9_20
s/Y; Dp(1;3)DC267	32	10	1	s/Y; Dp(1;3)DC267_10	s/Y; Dp(1;3)DC267_10_1
s/Y; Dp(1;3)DC267	41	10	2	s/Y; Dp(1;3)DC267_10	s/Y; Dp(1;3)DC267_10_2
s/Y; Dp(1;3)DC267	47	10	3	s/Y; Dp(1;3)DC267_10	s/Y; Dp(1;3)DC267_10_3
s/Y; Dp(1;3)DC267	46	10	4	s/Y; Dp(1;3)DC267_10	s/Y; Dp(1;3)DC267_10_4
s/Y; Dp(1;3)DC267	55	10	5	s/Y; Dp(1;3)DC267_10	s/Y; Dp(1;3)DC267_10_5
s/Y; Dp(1;3)DC267	57	10	6	s/Y; Dp(1;3)DC267_10	s/Y; Dp(1;3)DC267_10_6
s/Y; Dp(1;3)DC267	51	10	7	s/Y; Dp(1;3)DC267_10	s/Y; Dp(1;3)DC267_10_7
s/Y; Dp(1;3)DC267	44	10	8	s/Y; Dp(1;3)DC267_10	s/Y; Dp(1;3)DC267_10_8
s/Y; Dp(1;3)DC267	54	10	9	s/Y; Dp(1;3)DC267_10	s/Y; Dp(1;3)DC267_10_9
s/Y; Dp(1;3)DC267	43	10	10	s/Y; Dp(1;3)DC267_10	s/Y; Dp(1;3)DC267_10_10
s/Y; Dp(1;3)DC267	36	10	11	s/Y; Dp(1;3)DC267_10	s/Y; Dp(1;3)DC267_10_11
s/Y; Dp(1;3)DC267	40	10	12	s/Y; Dp(1;3)DC267_10	s/Y; Dp(1;3)DC267_10_12
s/Y; Dp(1;3)DC267	45	10	13	s/Y; Dp(1;3)DC267_10	s/Y; Dp(1;3)DC267_10_13
s/Y; Dp(1;3)DC267	38	10	14	s/Y; Dp(1;3)DC267_10	s/Y; Dp(1;3)DC267_10_14
s/Y; Dp(1;3)DC267	52	10	15	s/Y; Dp(1;3)DC267_10	s/Y; Dp(1;3)DC267_10_15
s/Y; Dp(1;3)DC267	53	10	16	s/Y; Dp(1;3)DC267_10	s/Y; Dp(1;3)DC267_10_16
s/Y; Dp(1;3)DC267	50	10	17	s/Y; Dp(1;3)DC267_10	s/Y; Dp(1;3)DC267_10_17
s/Y; Dp(1;3)DC267	33	10	18	s/Y; Dp(1;3)DC267_10	s/Y; Dp(1;3)DC267_10_18
s/Y; Dp(1;3)DC267	45	10	19	s/Y; Dp(1;3)DC267_10	s/Y; Dp(1;3)DC267_10_19
s/Y; Dp(1;3)DC267	51	10	20	s/Y; Dp(1;3)DC267_10	s/Y; Dp(1;3)DC267_10_20
s/Y; Dp(1;3)DC267	41	11	1	s/Y; Dp(1;3)DC267_11	s/Y; Dp(1;3)DC267_11_1
s/Y; Dp(1;3)DC267	39	11	2	s/Y; Dp(1;3)DC267_11	s/Y; Dp(1;3)DC267_11_2
s/Y; Dp(1;3)DC267	38	11	3	s/Y; Dp(1;3)DC267_11	s/Y; Dp(1;3)DC267_11_3
s/Y; Dp(1;3)DC267	35	11	4	s/Y; Dp(1;3)DC267_11	s/Y; Dp(1;3)DC267_11_4
s/Y; Dp(1;3)DC267	51	11	5	s/Y; Dp(1;3)DC267_11	s/Y; Dp(1;3)DC267_11_5
s/Y; Dp(1;3)DC267	57	11	6	s/Y; Dp(1;3)DC267_11	s/Y; Dp(1;3)DC267_11_6
s/Y; Dp(1;3)DC267	46	11	7	s/Y; Dp(1;3)DC267_11	s/Y; Dp(1;3)DC267_11_7
s/Y; Dp(1;3)DC267	46	11	8	s/Y; Dp(1;3)DC267_11	s/Y; Dp(1;3)DC267_11_8
s/Y; Dp(1;3)DC267	47	11	9	s/Y; Dp(1;3)DC267_11	s/Y; Dp(1;3)DC267_11_9
s/Y; Dp(1;3)DC267	41	11	10	s/Y; Dp(1;3)DC267_11	s/Y; Dp(1;3)DC267_11_10
s/Y; Dp(1;3)DC267	42	11	11	s/Y; Dp(1;3)DC267_11	s/Y; Dp(1;3)DC267_11_11
s/Y; Dp(1;3)DC267	46	11	12	s/Y; Dp(1;3)DC267_11	s/Y; Dp(1;3)DC267_11_12
s/Y; Dp(1;3)DC267	32	11	13	s/Y; Dp(1;3)DC267_11	s/Y; Dp(1;3)DC267_11_13
s/Y; Dp(1;3)DC267	37	11	14	s/Y; Dp(1;3)DC267_11	s/Y; Dp(1;3)DC267_11_14
s/Y; Dp(1;3)DC267	38	11	15	s/Y; Dp(1;3)DC267_11	s/Y; Dp(1;3)DC267_11_15
s/Y; Dp(1;3)DC267	38	11	16	s/Y; Dp(1;3)DC267_11	s/Y; Dp(1;3)DC267_11_16
s/Y; Dp(1;3)DC267	39	11	17	s/Y; Dp(1;3)DC267_11	s/Y; Dp(1;3)DC267_11_17
s/Y; Dp(1;3)DC267	39	11	18	s/Y; Dp(1;3)DC267_11	s/Y; Dp(1;3)DC267_11_18
s/Y; Dp(1;3)DC267	42	11	19	s/Y; Dp(1;3)DC267_11	s/Y; Dp(1;3)DC267_11_19
s/Y; Dp(1;3)DC267	33	11	20	s/Y; Dp(1;3)DC267_11	s/Y; Dp(1;3)DC267_11_20
s/Y; Dp(1;3)DC267	38	12	1	s/Y; Dp(1;3)DC267_12	s/Y; Dp(1;3)DC267_12_1
s/Y; Dp(1;3)DC267	45	12	2	s/Y; Dp(1;3)DC267_12	s/Y; Dp(1;3)DC267_12_2
s/Y; Dp(1;3)DC267	38	12	3	s/Y; Dp(1;3)DC267_12	s/Y; Dp(1;3)DC267_12_3
s/Y; Dp(1;3)DC267	38	12	4	s/Y; Dp(1;3)DC267_12	s/Y; Dp(1;3)DC267_12_4
s/Y; Dp(1;3)DC267	43	12	5	s/Y; Dp(1;3)DC267_12	s/Y; Dp(1;3)DC267_12_5
s/Y; Dp(1;3)DC267	38	12	6	s/Y; Dp(1;3)DC267_12	s/Y; Dp(1;3)DC267_12_6
s/Y; Dp(1;3)DC267	42	12	7	s/Y; Dp(1;3)DC267_12	s/Y; Dp(1;3)DC267_12_7
s/Y; Dp(1;3)DC267	49	12	8	s/Y; Dp(1;3)DC267_12	s/Y; Dp(1;3)DC267_12_8
s/Y; Dp(1;3)DC267	35	12	9	s/Y; Dp(1;3)DC267_12	s/Y; Dp(1;3)DC267_12_9
s/Y; Dp(1;3)DC267	44	12	10	s/Y; Dp(1;3)DC267_12	s/Y; Dp(1;3)DC267_12_10
s/Y; Dp(1;3)DC267	38	12	11	s/Y; Dp(1;3)DC267_12	s/Y; Dp(1;3)DC267_12_11
s/Y; Dp(1;3)DC267	54	12	12	s/Y; Dp(1;3)DC267_12	s/Y; Dp(1;3)DC267_12_12
s/Y; Dp(1;3)DC267	45	12	13	s/Y; Dp(1;3)DC267_12	s/Y; Dp(1;3)DC267_12_13
s/Y; Dp(1;3)DC267	54	12	14	s/Y; Dp(1;3)DC267_12	s/Y; Dp(1;3)DC267_12_14
s/Y; Dp(1;3)DC267	58	12	15	s/Y; Dp(1;3)DC267_12	s/Y; Dp(1;3)DC267_12_15
s/Y; Dp(1;3)DC267	55	12	16	s/Y; Dp(1;3)DC267_12	s/Y; Dp(1;3)DC267_12_16
s/Y; Dp(1;3)DC267	39	12	17	s/Y; Dp(1;3)DC267_12	s/Y; Dp(1;3)DC267_12_17
s/Y; Dp(1;3)DC267	42	12	18	s/Y; Dp(1;3)DC267_12	s/Y; Dp(1;3)DC267_12_18
s/Y; Dp(1;3)DC267	45	12	19	s/Y; Dp(1;3)DC267_12	s/Y; Dp(1;3)DC267_12_19
s/Y; Dp(1;3)DC267	46	12	20	s/Y; Dp(1;3)DC267_12	s/Y; Dp(1;3)DC267_12_20
s/Y; Dp(1;3)DC267	60	13	1	s/Y; Dp(1;3)DC267_13	s/Y; Dp(1;3)DC267_13_1
s/Y; Dp(1;3)DC267	53	13	2	s/Y; Dp(1;3)DC267_13	s/Y; Dp(1;3)DC267_13_2
s/Y; Dp(1;3)DC267	52	13	3	s/Y; Dp(1;3)DC267_13	s/Y; Dp(1;3)DC267_13_3
s/Y; Dp(1;3)DC267	57	13	4	s/Y; Dp(1;3)DC267_13	s/Y; Dp(1;3)DC267_13_4
s/Y; Dp(1;3)DC267	53	13	5	s/Y; Dp(1;3)DC267_13	s/Y; Dp(1;3)DC267_13_5
s/Y; Dp(1;3)DC267	54	13	6	s/Y; Dp(1;3)DC267_13	s/Y; Dp(1;3)DC267_13_6
s/Y; Dp(1;3)DC267	61	13	7	s/Y; Dp(1;3)DC267_13	s/Y; Dp(1;3)DC267_13_7
s/Y; Dp(1;3)DC267	70	13	8	s/Y; Dp(1;3)DC267_13	s/Y; Dp(1;3)DC267_13_8
s/Y; Dp(1;3)DC267	63	13	9	s/Y; Dp(1;3)DC267_13	s/Y; Dp(1;3)DC267_13_9
s/Y; Dp(1;3)DC267	68	13	10	s/Y; Dp(1;3)DC267_13	s/Y; Dp(1;3)DC267_13_10
s/Y; Dp(1;3)DC267	57	13	11	s/Y; Dp(1;3)DC267_13	s/Y; Dp(1;3)DC267_13_11
s/Y; Dp(1;3)DC267	52	13	12	s/Y; Dp(1;3)DC267_13	s/Y; Dp(1;3)DC267_13_12
s/Y; Dp(1;3)DC267	55	13	13	s/Y; Dp(1;3)DC267_13	s/Y; Dp(1;3)DC267_13_13
s/Y; Dp(1;3)DC267	47	13	14	s/Y; Dp(1;3)DC267_13	s/Y; Dp(1;3)DC267_13_14
s/Y; Dp(1;3)DC267	42	13	15	s/Y; Dp(1;3)DC267_13	s/Y; Dp(1;3)DC267_13_15
s/Y; Dp(1;3)DC267	50	13	16	s/Y; Dp(1;3)DC267_13	s/Y; Dp(1;3)DC267_13_16
s/Y; Dp(1;3)DC267	51	13	17	s/Y; Dp(1;3)DC267_13	s/Y; Dp(1;3)DC267_13_17
s/Y; Dp(1;3)DC267	49	13	18	s/Y; Dp(1;3)DC267_13	s/Y; Dp(1;3)DC267_13_18
s/Y; Dp(1;3)DC267	57	13	19	s/Y; Dp(1;3)DC267_13	s/Y; Dp(1;3)DC267_13_19
s/Y; Dp(1;3)DC267	61	13	20	s/Y; Dp(1;3)DC267_13	s/Y; Dp(1;3)DC267_13_20
s/Y; Dp(1;3)DC267	50	14	1	s/Y; Dp(1;3)DC267_14	s/Y; Dp(1;3)DC267_14_1
s/Y; Dp(1;3)DC267	57	14	2	s/Y; Dp(1;3)DC267_14	s/Y; Dp(1;3)DC267_14_2
s/Y; Dp(1;3)DC267	46	14	3	s/Y; Dp(1;3)DC267_14	s/Y; Dp(1;3)DC267_14_3
s/Y; Dp(1;3)DC267	44	14	4	s/Y; Dp(1;3)DC267_14	s/Y; Dp(1;3)DC267_14_4
s/Y; Dp(1;3)DC267	46	14	5	s/Y; Dp(1;3)DC267_14	s/Y; Dp(1;3)DC267_14_5
s/Y; Dp(1;3)DC267	53	14	6	s/Y; Dp(1;3)DC267_14	s/Y; Dp(1;3)DC267_14_6
s/Y; Dp(1;3)DC267	53	14	7	s/Y; Dp(1;3)DC267_14	s/Y; Dp(1;3)DC267_14_7
s/Y; Dp(1;3)DC267	47	14	8	s/Y; Dp(1;3)DC267_14	s/Y; Dp(1;3)DC267_14_8
s/Y; Dp(1;3)DC267	38	14	9	s/Y; Dp(1;3)DC267_14	s/Y; Dp(1;3)DC267_14_9
s/Y; Dp(1;3)DC267	48	14	10	s/Y; Dp(1;3)DC267_14	s/Y; Dp(1;3)DC267_14_10
s/Y; Dp(1;3)DC267	43	14	11	s/Y; Dp(1;3)DC267_14	s/Y; Dp(1;3)DC267_14_11
s/Y; Dp(1;3)DC267	56	14	12	s/Y; Dp(1;3)DC267_14	s/Y; Dp(1;3)DC267_14_12
s/Y; Dp(1;3)DC267	64	14	13	s/Y; Dp(1;3)DC267_14	s/Y; Dp(1;3)DC267_14_13
s/Y; Dp(1;3)DC267	39	14	14	s/Y; Dp(1;3)DC267_14	s/Y; Dp(1;3)DC267_14_14
s/Y; Dp(1;3)DC267	48	14	15	s/Y; Dp(1;3)DC267_14	s/Y; Dp(1;3)DC267_14_15
s/Y; Dp(1;3)DC267	51	14	16	s/Y; Dp(1;3)DC267_14	s/Y; Dp(1;3)DC267_14_16
s/Y; Dp(1;3)DC267	48	14	17	s/Y; Dp(1;3)DC267_14	s/Y; Dp(1;3)DC267_14_17
s/Y; Dp(1;3)DC267	40	14	18	s/Y; Dp(1;3)DC267_14	s/Y; Dp(1;3)DC267_14_18
s/Y; Dp(1;3)DC267	48	14	19	s/Y; Dp(1;3)DC267_14	s/Y; Dp(1;3)DC267_14_19
s/Y; Dp(1;3)DC267	50	14	20	s/Y; Dp(1;3)DC267_14	s/Y; Dp(1;3)DC267_14_20
s/Y; Dp(1;3)DC267	42	15	1	s/Y; Dp(1;3)DC267_15	s/Y; Dp(1;3)DC267_15_1
s/Y; Dp(1;3)DC267	34	15	2	s/Y; Dp(1;3)DC267_15	s/Y; Dp(1;3)DC267_15_2
s/Y; Dp(1;3)DC267	34	15	3	s/Y; Dp(1;3)DC267_15	s/Y; Dp(1;3)DC267_15_3
s/Y; Dp(1;3)DC267	33	15	4	s/Y; Dp(1;3)DC267_15	s/Y; Dp(1;3)DC267_15_4
s/Y; Dp(1;3)DC267	35	15	5	s/Y; Dp(1;3)DC267_15	s/Y; Dp(1;3)DC267_15_5
s/Y; Dp(1;3)DC267	52	15	6	s/Y; Dp(1;3)DC267_15	s/Y; Dp(1;3)DC267_15_6
s/Y; Dp(1;3)DC267	44	15	7	s/Y; Dp(1;3)DC267_15	s/Y; Dp(1;3)DC267_15_7
s/Y; Dp(1;3)DC267	40	15	8	s/Y; Dp(1;3)DC267_15	s/Y; Dp(1;3)DC267_15_8
s/Y; Dp(1;3)DC267	31	15	9	s/Y; Dp(1;3)DC267_15	s/Y; Dp(1;3)DC267_15_9
s/Y; Dp(1;3)DC267	38	15	10	s/Y; Dp(1;3)DC267_15	s/Y; Dp(1;3)DC267_15_10
s/Y; Dp(1;3)DC267	40	15	11	s/Y; Dp(1;3)DC267_15	s/Y; Dp(1;3)DC267_15_11
s/Y; Dp(1;3)DC267	42	15	12	s/Y; Dp(1;3)DC267_15	s/Y; Dp(1;3)DC267_15_12
s/Y; Dp(1;3)DC267	28	15	13	s/Y; Dp(1;3)DC267_15	s/Y; Dp(1;3)DC267_15_13
s/Y; Dp(1;3)DC267	40	15	14	s/Y; Dp(1;3)DC267_15	s/Y; Dp(1;3)DC267_15_14
s/Y; Dp(1;3)DC267	30	15	15	s/Y; Dp(1;3)DC267_15	s/Y; Dp(1;3)DC267_15_15
s/Y; Dp(1;3)DC267	43	15	16	s/Y; Dp(1;3)DC267_15	s/Y; Dp(1;3)DC267_15_16
s/Y; Dp(1;3)DC267	33	15	17	s/Y; Dp(1;3)DC267_15	s/Y; Dp(1;3)DC267_15_17
s/Y; Dp(1;3)DC267	40	15	18	s/Y; Dp(1;3)DC267_15	s/Y; Dp(1;3)DC267_15_18
s/Y; Dp(1;3)DC267	47	15	19	s/Y; Dp(1;3)DC267_15	s/Y; Dp(1;3)DC267_15_19
s/Y; Dp(1;3)DC267	41	15	20	s/Y; Dp(1;3)DC267_15	s/Y; Dp(1;3)DC267_15_20
s/Y; Dp(1;3)DC268	69	1	1	s/Y; Dp(1;3)DC268_1	s/Y; Dp(1;3)DC268_1_1
s/Y; Dp(1;3)DC268	64	1	2	s/Y; Dp(1;3)DC268_1	s/Y; Dp(1;3)DC268_1_2
s/Y; Dp(1;3)DC268	75	1	3	s/Y; Dp(1;3)DC268_1	s/Y; Dp(1;3)DC268_1_3
s/Y; Dp(1;3)DC268	76	1	4	s/Y; Dp(1;3)DC268_1	s/Y; Dp(1;3)DC268_1_4
s/Y; Dp(1;3)DC268	78	1	5	s/Y; Dp(1;3)DC268_1	s/Y; Dp(1;3)DC268_1_5
s/Y; Dp(1;3)DC268	68	1	6	s/Y; Dp(1;3)DC268_1	s/Y; Dp(1;3)DC268_1_6
s/Y; Dp(1;3)DC268	66	1	7	s/Y; Dp(1;3)DC268_1	s/Y; Dp(1;3)DC268_1_7
s/Y; Dp(1;3)DC268	79	1	8	s/Y; Dp(1;3)DC268_1	s/Y; Dp(1;3)DC268_1_8
s/Y; Dp(1;3)DC268	63	1	9	s/Y; Dp(1;3)DC268_1	s/Y; Dp(1;3)DC268_1_9
s/Y; Dp(1;3)DC268	70	1	10	s/Y; Dp(1;3)DC268_1	s/Y; Dp(1;3)DC268_1_10
s/Y; Dp(1;3)DC268	66	1	11	s/Y; Dp(1;3)DC268_1	s/Y; Dp(1;3)DC268_1_11
s/Y; Dp(1;3)DC268	72	1	12	s/Y; Dp(1;3)DC268_1	s/Y; Dp(1;3)DC268_1_12
s/Y; Dp(1;3)DC268	78	1	13	s/Y; Dp(1;3)DC268_1	s/Y; Dp(1;3)DC268_1_13
s/Y; Dp(1;3)DC268	66	1	14	s/Y; Dp(1;3)DC268_1	s/Y; Dp(1;3)DC268_1_14
s/Y; Dp(1;3)DC268	75	1	15	s/Y; Dp(1;3)DC268_1	s/Y; Dp(1;3)DC268_1_15
s/Y; Dp(1;3)DC268	71	1	16	s/Y; Dp(1;3)DC268_1	s/Y; Dp(1;3)DC268_1_16
s/Y; Dp(1;3)DC268	79	1	17	s/Y; Dp(1;3)DC268_1	s/Y; Dp(1;3)DC268_1_17
s/Y; Dp(1;3)DC268	65	1	18	s/Y; Dp(1;3)DC268_1	s/Y; Dp(1;3)DC268_1_18
s/Y; Dp(1;3)DC268	84	1	19	s/Y; Dp(1;3)DC268_1	s/Y; Dp(1;3)DC268_1_19
s/Y; Dp(1;3)DC268	62	1	20	s/Y; Dp(1;3)DC268_1	s/Y; Dp(1;3)DC268_1_20
s/Y; Dp(1;3)DC268	75	2	1	s/Y; Dp(1;3)DC268_2	s/Y; Dp(1;3)DC268_2_1
s/Y; Dp(1;3)DC268	82	2	2	s/Y; Dp(1;3)DC268_2	s/Y; Dp(1;3)DC268_2_2
s/Y; Dp(1;3)DC268	68	2	3	s/Y; Dp(1;3)DC268_2	s/Y; Dp(1;3)DC268_2_3
s/Y; Dp(1;3)DC268	66	2	4	s/Y; Dp(1;3)DC268_2	s/Y; Dp(1;3)DC268_2_4
s/Y; Dp(1;3)DC268	76	2	5	s/Y; Dp(1;3)DC268_2	s/Y; Dp(1;3)DC268_2_5
s/Y; Dp(1;3)DC268	85	2	6	s/Y; Dp(1;3)DC268_2	s/Y; Dp(1;3)DC268_2_6
s/Y; Dp(1;3)DC268	83	2	7	s/Y; Dp(1;3)DC268_2	s/Y; Dp(1;3)DC268_2_7
s/Y; Dp(1;3)DC268	80	2	8	s/Y; Dp(1;3)DC268_2	s/Y; Dp(1;3)DC268_2_8
s/Y; Dp(1;3)DC268	79	2	9	s/Y; Dp(1;3)DC268_2	s/Y; Dp(1;3)DC268_2_9
s/Y; Dp(1;3)DC268	83	2	10	s/Y; Dp(1;3)DC268_2	s/Y; Dp(1;3)DC268_2_10
s/Y; Dp(1;3)DC268	82	2	11	s/Y; Dp(1;3)DC268_2	s/Y; Dp(1;3)DC268_2_11
s/Y; Dp(1;3)DC268	89	2	12	s/Y; Dp(1;3)DC268_2	s/Y; Dp(1;3)DC268_2_12
s/Y; Dp(1;3)DC268	78	2	13	s/Y; Dp(1;3)DC268_2	s/Y; Dp(1;3)DC268_2_13
s/Y; Dp(1;3)DC268	83	2	14	s/Y; Dp(1;3)DC268_2	s/Y; Dp(1;3)DC268_2_14
s/Y; Dp(1;3)DC268	81	2	15	s/Y; Dp(1;3)DC268_2	s/Y; Dp(1;3)DC268_2_15
s/Y; Dp(1;3)DC268	72	2	16	s/Y; Dp(1;3)DC268_2	s/Y; Dp(1;3)DC268_2_16
s/Y; Dp(1;3)DC268	85	2	17	s/Y; Dp(1;3)DC268_2	s/Y; Dp(1;3)DC268_2_17
s/Y; Dp(1;3)DC268	83	2	18	s/Y; Dp(1;3)DC268_2	s/Y; Dp(1;3)DC268_2_18
s/Y; Dp(1;3)DC268	74	2	19	s/Y; Dp(1;3)DC268_2	s/Y; Dp(1;3)DC268_2_19
s/Y; Dp(1;3)DC268	77	2	20	s/Y; Dp(1;3)DC268_2	s/Y; Dp(1;3)DC268_2_20
s/Y; Dp(1;3)DC268	62	3	1	s/Y; Dp(1;3)DC268_3	s/Y; Dp(1;3)DC268_3_1
s/Y; Dp(1;3)DC268	61	3	2	s/Y; Dp(1;3)DC268_3	s/Y; Dp(1;3)DC268_3_2
s/Y; Dp(1;3)DC268	53	3	3	s/Y; Dp(1;3)DC268_3	s/Y; Dp(1;3)DC268_3_3
s/Y; Dp(1;3)DC268	64	3	4	s/Y; Dp(1;3)DC268_3	s/Y; Dp(1;3)DC268_3_4
s/Y; Dp(1;3)DC268	66	3	5	s/Y; Dp(1;3)DC268_3	s/Y; Dp(1;3)DC268_3_5
s/Y; Dp(1;3)DC268	66	3	6	s/Y; Dp(1;3)DC268_3	s/Y; Dp(1;3)DC268_3_6
s/Y; Dp(1;3)DC268	74	3	7	s/Y; Dp(1;3)DC268_3	s/Y; Dp(1;3)DC268_3_7
s/Y; Dp(1;3)DC268	75	3	8	s/Y; Dp(1;3)DC268_3	s/Y; Dp(1;3)DC268_3_8
s/Y; Dp(1;3)DC268	73	3	9	s/Y; Dp(1;3)DC268_3	s/Y; Dp(1;3)DC268_3_9
s/Y; Dp(1;3)DC268	65	3	10	s/Y; Dp(1;3)DC268_3	s/Y; Dp(1;3)DC268_3_10
s/Y; Dp(1;3)DC268	69	3	11	s/Y; Dp(1;3)DC268_3	s/Y; Dp(1;3)DC268_3_11
s/Y; Dp(1;3)DC268	64	3	12	s/Y; Dp(1;3)DC268_3	s/Y; Dp(1;3)DC268_3_12
s/Y; Dp(1;3)DC268	58	3	13	s/Y; Dp(1;3)DC268_3	s/Y; Dp(1;3)DC268_3_13
s/Y; Dp(1;3)DC268	68	3	14	s/Y; Dp(1;3)DC268_3	s/Y; Dp(1;3)DC268_3_14
s/Y; Dp(1;3)DC268	61	3	15	s/Y; Dp(1;3)DC268_3	s/Y; Dp(1;3)DC268_3_15
s/Y; Dp(1;3)DC268	59	3	16	s/Y; Dp(1;3)DC268_3	s/Y; Dp(1;3)DC268_3_16
s/Y; Dp(1;3)DC268	62	3	17	s/Y; Dp(1;3)DC268_3	s/Y; Dp(1;3)DC268_3_17
s/Y; Dp(1;3)DC268	53	3	18	s/Y; Dp(1;3)DC268_3	s/Y; Dp(1;3)DC268_3_18
s/Y; Dp(1;3)DC268	56	3	19	s/Y; Dp(1;3)DC268_3	s/Y; Dp(1;3)DC268_3_19
s/Y; Dp(1;3)DC268	72	3	20	s/Y; Dp(1;3)DC268_3	s/Y; Dp(1;3)DC268_3_20
s/Y; Dp(1;3)DC268	68	4	1	s/Y; Dp(1;3)DC268_4	s/Y; Dp(1;3)DC268_4_1
s/Y; Dp(1;3)DC268	65	4	2	s/Y; Dp(1;3)DC268_4	s/Y; Dp(1;3)DC268_4_2
s/Y; Dp(1;3)DC268	77	4	3	s/Y; Dp(1;3)DC268_4	s/Y; Dp(1;3)DC268_4_3
s/Y; Dp(1;3)DC268	66	4	4	s/Y; Dp(1;3)DC268_4	s/Y; Dp(1;3)DC268_4_4
s/Y; Dp(1;3)DC268	71	4	5	s/Y; Dp(1;3)DC268_4	s/Y; Dp(1;3)DC268_4_5
s/Y; Dp(1;3)DC268	51	4	6	s/Y; Dp(1;3)DC268_4	s/Y; Dp(1;3)DC268_4_6
s/Y; Dp(1;3)DC268	63	4	7	s/Y; Dp(1;3)DC268_4	s/Y; Dp(1;3)DC268_4_7
s/Y; Dp(1;3)DC268	66	4	8	s/Y; Dp(1;3)DC268_4	s/Y; Dp(1;3)DC268_4_8
s/Y; Dp(1;3)DC268	66	4	9	s/Y; Dp(1;3)DC268_4	s/Y; Dp(1;3)DC268_4_9
s/Y; Dp(1;3)DC268	62	4	10	s/Y; Dp(1;3)DC268_4	s/Y; Dp(1;3)DC268_4_10
s/Y; Dp(1;3)DC268	69	4	11	s/Y; Dp(1;3)DC268_4	s/Y; Dp(1;3)DC268_4_11
s/Y; Dp(1;3)DC268	65	4	12	s/Y; Dp(1;3)DC268_4	s/Y; Dp(1;3)DC268_4_12
s/Y; Dp(1;3)DC268	48	4	13	s/Y; Dp(1;3)DC268_4	s/Y; Dp(1;3)DC268_4_13
s/Y; Dp(1;3)DC268	53	4	14	s/Y; Dp(1;3)DC268_4	s/Y; Dp(1;3)DC268_4_14
s/Y; Dp(1;3)DC268	60	4	15	s/Y; Dp(1;3)DC268_4	s/Y; Dp(1;3)DC268_4_15
s/Y; Dp(1;3)DC268	67	4	16	s/Y; Dp(1;3)DC268_4	s/Y; Dp(1;3)DC268_4_16
s/Y; Dp(1;3)DC268	58	4	17	s/Y; Dp(1;3)DC268_4	s/Y; Dp(1;3)DC268_4_17
s/Y; Dp(1;3)DC268	61	4	18	s/Y; Dp(1;3)DC268_4	s/Y; Dp(1;3)DC268_4_18
s/Y; Dp(1;3)DC268	60	4	19	s/Y; Dp(1;3)DC268_4	s/Y; Dp(1;3)DC268_4_19
s/Y; Dp(1;3)DC268	67	4	20	s/Y; Dp(1;3)DC268_4	s/Y; Dp(1;3)DC268_4_20
s/Y; Dp(1;3)DC268	68	5	1	s/Y; Dp(1;3)DC268_5	s/Y; Dp(1;3)DC268_5_1
s/Y; Dp(1;3)DC268	62	5	2	s/Y; Dp(1;3)DC268_5	s/Y; Dp(1;3)DC268_5_2
s/Y; Dp(1;3)DC268	64	5	3	s/Y; Dp(1;3)DC268_5	s/Y; Dp(1;3)DC268_5_3
s/Y; Dp(1;3)DC268	59	5	4	s/Y; Dp(1;3)DC268_5	s/Y; Dp(1;3)DC268_5_4
s/Y; Dp(1;3)DC268	62	5	5	s/Y; Dp(1;3)DC268_5	s/Y; Dp(1;3)DC268_5_5
s/Y; Dp(1;3)DC268	78	5	6	s/Y; Dp(1;3)DC268_5	s/Y; Dp(1;3)DC268_5_6
s/Y; Dp(1;3)DC268	76	5	7	s/Y; Dp(1;3)DC268_5	s/Y; Dp(1;3)DC268_5_7
s/Y; Dp(1;3)DC268	78	5	8	s/Y; Dp(1;3)DC268_5	s/Y; Dp(1;3)DC268_5_8
s/Y; Dp(1;3)DC268	62	5	9	s/Y; Dp(1;3)DC268_5	s/Y; Dp(1;3)DC268_5_9
s/Y; Dp(1;3)DC268	85	5	10	s/Y; Dp(1;3)DC268_5	s/Y; Dp(1;3)DC268_5_10
s/Y; Dp(1;3)DC268	79	5	11	s/Y; Dp(1;3)DC268_5	s/Y; Dp(1;3)DC268_5_11
s/Y; Dp(1;3)DC268	80	5	12	s/Y; Dp(1;3)DC268_5	s/Y; Dp(1;3)DC268_5_12
s/Y; Dp(1;3)DC268	69	5	13	s/Y; Dp(1;3)DC268_5	s/Y; Dp(1;3)DC268_5_13
s/Y; Dp(1;3)DC268	64	5	14	s/Y; Dp(1;3)DC268_5	s/Y; Dp(1;3)DC268_5_14
s/Y; Dp(1;3)DC268	75	5	15	s/Y; Dp(1;3)DC268_5	s/Y; Dp(1;3)DC268_5_15
s/Y; Dp(1;3)DC268	73	5	16	s/Y; Dp(1;3)DC268_5	s/Y; Dp(1;3)DC268_5_16
s/Y; Dp(1;3)DC268	76	5	17	s/Y; Dp(1;3)DC268_5	s/Y; Dp(1;3)DC268_5_17
s/Y; Dp(1;3)DC268	65	5	18	s/Y; Dp(1;3)DC268_5	s/Y; Dp(1;3)DC268_5_18
s/Y; Dp(1;3)DC268	72	5	19	s/Y; Dp(1;3)DC268_5	s/Y; Dp(1;3)DC268_5_19
s/Y; Dp(1;3)DC268	69	5	20	s/Y; Dp(1;3)DC268_5	s/Y; Dp(1;3)DC268_5_20
s/Y; Dp(1;3)DC268	77	6	1	s/Y; Dp(1;3)DC268_6	s/Y; Dp(1;3)DC268_6_1
s/Y; Dp(1;3)DC268	70	6	2	s/Y; Dp(1;3)DC268_6	s/Y; Dp(1;3)DC268_6_2
s/Y; Dp(1;3)DC268	80	6	3	s/Y; Dp(1;3)DC268_6	s/Y; Dp(1;3)DC268_6_3
s/Y; Dp(1;3)DC268	82	6	4	s/Y; Dp(1;3)DC268_6	s/Y; Dp(1;3)DC268_6_4
s/Y; Dp(1;3)DC268	67	6	5	s/Y; Dp(1;3)DC268_6	s/Y; Dp(1;3)DC268_6_5
s/Y; Dp(1;3)DC268	82	6	6	s/Y; Dp(1;3)DC268_6	s/Y; Dp(1;3)DC268_6_6
s/Y; Dp(1;3)DC268	72	6	7	s/Y; Dp(1;3)DC268_6	s/Y; Dp(1;3)DC268_6_7
s/Y; Dp(1;3)DC268	69	6	8	s/Y; Dp(1;3)DC268_6	s/Y; Dp(1;3)DC268_6_8
s/Y; Dp(1;3)DC268	57	6	9	s/Y; Dp(1;3)DC268_6	s/Y; Dp(1;3)DC268_6_9
s/Y; Dp(1;3)DC268	87	6	10	s/Y; Dp(1;3)DC268_6	s/Y; Dp(1;3)DC268_6_10
s/Y; Dp(1;3)DC268	71	6	11	s/Y; Dp(1;3)DC268_6	s/Y; Dp(1;3)DC268_6_11
s/Y; Dp(1;3)DC268	64	6	12	s/Y; Dp(1;3)DC268_6	s/Y; Dp(1;3)DC268_6_12
s/Y; Dp(1;3)DC268	56	6	13	s/Y; Dp(1;3)DC268_6	s/Y; Dp(1;3)DC268_6_13
s/Y; Dp(1;3)DC268	82	6	14	s/Y; Dp(1;3)DC268_6	s/Y; Dp(1;3)DC268_6_14
s/Y; Dp(1;3)DC268	82	6	15	s/Y; Dp(1;3)DC268_6	s/Y; Dp(1;3)DC268_6_15
s/Y; Dp(1;3)DC268	82	6	16	s/Y; Dp(1;3)DC268_6	s/Y; Dp(1;3)DC268_6_16
s/Y; Dp(1;3)DC268	61	6	17	s/Y; Dp(1;3)DC268_6	s/Y; Dp(1;3)DC268_6_17
s/Y; Dp(1;3)DC268	62	6	18	s/Y; Dp(1;3)DC268_6	s/Y; Dp(1;3)DC268_6_18
s/Y; Dp(1;3)DC268	81	6	19	s/Y; Dp(1;3)DC268_6	s/Y; Dp(1;3)DC268_6_19
s/Y; Dp(1;3)DC268	66	6	20	s/Y; Dp(1;3)DC268_6	s/Y; Dp(1;3)DC268_6_20
s/Y; Dp(1;3)DC268	68	7	1	s/Y; Dp(1;3)DC268_7	s/Y; Dp(1;3)DC268_7_1
s/Y; Dp(1;3)DC268	75	7	2	s/Y; Dp(1;3)DC268_7	s/Y; Dp(1;3)DC268_7_2
s/Y; Dp(1;3)DC268	72	7	3	s/Y; Dp(1;3)DC268_7	s/Y; Dp(1;3)DC268_7_3
s/Y; Dp(1;3)DC268	56	7	4	s/Y; Dp(1;3)DC268_7	s/Y; Dp(1;3)DC268_7_4
s/Y; Dp(1;3)DC268	81	7	5	s/Y; Dp(1;3)DC268_7	s/Y; Dp(1;3)DC268_7_5
s/Y; Dp(1;3)DC268	77	7	6	s/Y; Dp(1;3)DC268_7	s/Y; Dp(1;3)DC268_7_6
s/Y; Dp(1;3)DC268	77	7	7	s/Y; Dp(1;3)DC268_7	s/Y; Dp(1;3)DC268_7_7
s/Y; Dp(1;3)DC268	74	7	8	s/Y; Dp(1;3)DC268_7	s/Y; Dp(1;3)DC268_7_8
s/Y; Dp(1;3)DC268	68	7	9	s/Y; Dp(1;3)DC268_7	s/Y; Dp(1;3)DC268_7_9
s/Y; Dp(1;3)DC268	82	7	10	s/Y; Dp(1;3)DC268_7	s/Y; Dp(1;3)DC268_7_10
s/Y; Dp(1;3)DC268	62	7	11	s/Y; Dp(1;3)DC268_7	s/Y; Dp(1;3)DC268_7_11
s/Y; Dp(1;3)DC268	75	7	12	s/Y; Dp(1;3)DC268_7	s/Y; Dp(1;3)DC268_7_12
s/Y; Dp(1;3)DC268	83	7	13	s/Y; Dp(1;3)DC268_7	s/Y; Dp(1;3)DC268_7_13
s/Y; Dp(1;3)DC268	76	7	14	s/Y; Dp(1;3)DC268_7	s/Y; Dp(1;3)DC268_7_14
s/Y; Dp(1;3)DC268	76	7	15	s/Y; Dp(1;3)DC268_7	s/Y; Dp(1;3)DC268_7_15
s/Y; Dp(1;3)DC268	77	7	16	s/Y; Dp(1;3)DC268_7	s/Y; Dp(1;3)DC268_7_16
s/Y; Dp(1;3)DC268	69	7	17	s/Y; Dp(1;3)DC268_7	s/Y; Dp(1;3)DC268_7_17
s/Y; Dp(1;3)DC268	79	7	18	s/Y; Dp(1;3)DC268_7	s/Y; Dp(1;3)DC268_7_18
s/Y; Dp(1;3)DC268	68	7	19	s/Y; Dp(1;3)DC268_7	s/Y; Dp(1;3)DC268_7_19
s/Y; Dp(1;3)DC268	79	7	20	s/Y; Dp(1;3)DC268_7	s/Y; Dp(1;3)DC268_7_20
s/Y; Dp(1;3)DC268	80	8	1	s/Y; Dp(1;3)DC268_8	s/Y; Dp(1;3)DC268_8_1
s/Y; Dp(1;3)DC268	76	8	2	s/Y; Dp(1;3)DC268_8	s/Y; Dp(1;3)DC268_8_2
s/Y; Dp(1;3)DC268	63	8	3	s/Y; Dp(1;3)DC268_8	s/Y; Dp(1;3)DC268_8_3
s/Y; Dp(1;3)DC268	74	8	4	s/Y; Dp(1;3)DC268_8	s/Y; Dp(1;3)DC268_8_4
s/Y; Dp(1;3)DC268	79	8	5	s/Y; Dp(1;3)DC268_8	s/Y; Dp(1;3)DC268_8_5
s/Y; Dp(1;3)DC268	68	8	6	s/Y; Dp(1;3)DC268_8	s/Y; Dp(1;3)DC268_8_6
s/Y; Dp(1;3)DC268	69	8	7	s/Y; Dp(1;3)DC268_8	s/Y; Dp(1;3)DC268_8_7
s/Y; Dp(1;3)DC268	65	8	8	s/Y; Dp(1;3)DC268_8	s/Y; Dp(1;3)DC268_8_8
s/Y; Dp(1;3)DC268	85	8	9	s/Y; Dp(1;3)DC268_8	s/Y; Dp(1;3)DC268_8_9
s/Y; Dp(1;3)DC268	84	8	10	s/Y; Dp(1;3)DC268_8	s/Y; Dp(1;3)DC268_8_10
s/Y; Dp(1;3)DC268	74	8	11	s/Y; Dp(1;3)DC268_8	s/Y; Dp(1;3)DC268_8_11
s/Y; Dp(1;3)DC268	84	8	12	s/Y; Dp(1;3)DC268_8	s/Y; Dp(1;3)DC268_8_12
s/Y; Dp(1;3)DC268	82	8	13	s/Y; Dp(1;3)DC268_8	s/Y; Dp(1;3)DC268_8_13
s/Y; Dp(1;3)DC268	69	8	14	s/Y; Dp(1;3)DC268_8	s/Y; Dp(1;3)DC268_8_14
s/Y; Dp(1;3)DC268	83	8	15	s/Y; Dp(1;3)DC268_8	s/Y; Dp(1;3)DC268_8_15
s/Y; Dp(1;3)DC268	77	8	16	s/Y; Dp(1;3)DC268_8	s/Y; Dp(1;3)DC268_8_16
s/Y; Dp(1;3)DC268	85	8	17	s/Y; Dp(1;3)DC268_8	s/Y; Dp(1;3)DC268_8_17
s/Y; Dp(1;3)DC268	75	8	18	s/Y; Dp(1;3)DC268_8	s/Y; Dp(1;3)DC268_8_18
s/Y; Dp(1;3)DC268	77	8	19	s/Y; Dp(1;3)DC268_8	s/Y; Dp(1;3)DC268_8_19
s/Y; Dp(1;3)DC268	84	8	20	s/Y; Dp(1;3)DC268_8	s/Y; Dp(1;3)DC268_8_20
s/Y; Dp(1;3)DC268	81	9	1	s/Y; Dp(1;3)DC268_9	s/Y; Dp(1;3)DC268_9_1
s/Y; Dp(1;3)DC268	75	9	2	s/Y; Dp(1;3)DC268_9	s/Y; Dp(1;3)DC268_9_2
s/Y; Dp(1;3)DC268	78	9	3	s/Y; Dp(1;3)DC268_9	s/Y; Dp(1;3)DC268_9_3
s/Y; Dp(1;3)DC268	70	9	4	s/Y; Dp(1;3)DC268_9	s/Y; Dp(1;3)DC268_9_4
s/Y; Dp(1;3)DC268	71	9	5	s/Y; Dp(1;3)DC268_9	s/Y; Dp(1;3)DC268_9_5
s/Y; Dp(1;3)DC268	73	9	6	s/Y; Dp(1;3)DC268_9	s/Y; Dp(1;3)DC268_9_6
s/Y; Dp(1;3)DC268	78	9	7	s/Y; Dp(1;3)DC268_9	s/Y; Dp(1;3)DC268_9_7
s/Y; Dp(1;3)DC268	76	9	8	s/Y; Dp(1;3)DC268_9	s/Y; Dp(1;3)DC268_9_8
s/Y; Dp(1;3)DC268	71	9	9	s/Y; Dp(1;3)DC268_9	s/Y; Dp(1;3)DC268_9_9
s/Y; Dp(1;3)DC268	97	9	10	s/Y; Dp(1;3)DC268_9	s/Y; Dp(1;3)DC268_9_10
s/Y; Dp(1;3)DC268	82	9	11	s/Y; Dp(1;3)DC268_9	s/Y; Dp(1;3)DC268_9_11
s/Y; Dp(1;3)DC268	77	9	12	s/Y; Dp(1;3)DC268_9	s/Y; Dp(1;3)DC268_9_12
s/Y; Dp(1;3)DC268	67	9	13	s/Y; Dp(1;3)DC268_9	s/Y; Dp(1;3)DC268_9_13
s/Y; Dp(1;3)DC268	83	9	14	s/Y; Dp(1;3)DC268_9	s/Y; Dp(1;3)DC268_9_14
s/Y; Dp(1;3)DC268	75	9	15	s/Y; Dp(1;3)DC268_9	s/Y; Dp(1;3)DC268_9_15
s/Y; Dp(1;3)DC268	87	9	16	s/Y; Dp(1;3)DC268_9	s/Y; Dp(1;3)DC268_9_16
s/Y; Dp(1;3)DC268	81	9	17	s/Y; Dp(1;3)DC268_9	s/Y; Dp(1;3)DC268_9_17
s/Y; Dp(1;3)DC268	79	9	18	s/Y; Dp(1;3)DC268_9	s/Y; Dp(1;3)DC268_9_18
s/Y; Dp(1;3)DC268	79	9	19	s/Y; Dp(1;3)DC268_9	s/Y; Dp(1;3)DC268_9_19
s/Y; Dp(1;3)DC268	82	9	20	s/Y; Dp(1;3)DC268_9	s/Y; Dp(1;3)DC268_9_20
s/Y; Dp(1;3)DC268	75	10	1	s/Y; Dp(1;3)DC268_10	s/Y; Dp(1;3)DC268_10_1
s/Y; Dp(1;3)DC268	80	10	2	s/Y; Dp(1;3)DC268_10	s/Y; Dp(1;3)DC268_10_2
s/Y; Dp(1;3)DC268	76	10	3	s/Y; Dp(1;3)DC268_10	s/Y; Dp(1;3)DC268_10_3
s/Y; Dp(1;3)DC268	75	10	4	s/Y; Dp(1;3)DC268_10	s/Y; Dp(1;3)DC268_10_4
s/Y; Dp(1;3)DC268	66	10	5	s/Y; Dp(1;3)DC268_10	s/Y; Dp(1;3)DC268_10_5
s/Y; Dp(1;3)DC268	71	10	6	s/Y; Dp(1;3)DC268_10	s/Y; Dp(1;3)DC268_10_6
s/Y; Dp(1;3)DC268	74	10	7	s/Y; Dp(1;3)DC268_10	s/Y; Dp(1;3)DC268_10_7
s/Y; Dp(1;3)DC268	58	10	8	s/Y; Dp(1;3)DC268_10	s/Y; Dp(1;3)DC268_10_8
s/Y; Dp(1;3)DC268	84	10	9	s/Y; Dp(1;3)DC268_10	s/Y; Dp(1;3)DC268_10_9
s/Y; Dp(1;3)DC268	68	10	10	s/Y; Dp(1;3)DC268_10	s/Y; Dp(1;3)DC268_10_10
s/Y; Dp(1;3)DC268	68	10	11	s/Y; Dp(1;3)DC268_10	s/Y; Dp(1;3)DC268_10_11
s/Y; Dp(1;3)DC268	82	10	12	s/Y; Dp(1;3)DC268_10	s/Y; Dp(1;3)DC268_10_12
s/Y; Dp(1;3)DC268	83	10	13	s/Y; Dp(1;3)DC268_10	s/Y; Dp(1;3)DC268_10_13
s/Y; Dp(1;3)DC268	78	10	14	s/Y; Dp(1;3)DC268_10	s/Y; Dp(1;3)DC268_10_14
s/Y; Dp(1;3)DC268	84	10	15	s/Y; Dp(1;3)DC268_10	s/Y; Dp(1;3)DC268_10_15
s/Y; Dp(1;3)DC268	75	10	16	s/Y; Dp(1;3)DC268_10	s/Y; Dp(1;3)DC268_10_16
s/Y; Dp(1;3)DC268	78	10	17	s/Y; Dp(1;3)DC268_10	s/Y; Dp(1;3)DC268_10_17
s/Y; Dp(1;3)DC268	62	10	18	s/Y; Dp(1;3)DC268_10	s/Y; Dp(1;3)DC268_10_18
s/Y; Dp(1;3)DC268	78	10	19	s/Y; Dp(1;3)DC268_10	s/Y; Dp(1;3)DC268_10_19
s/Y; Dp(1;3)DC268	77	10	20	s/Y; Dp(1;3)DC268_10	s/Y; Dp(1;3)DC268_10_20
s/Y; Dp(1;3)DC268	64	11	1	s/Y; Dp(1;3)DC268_11	s/Y; Dp(1;3)DC268_11_1
s/Y; Dp(1;3)DC268	75	11	2	s/Y; Dp(1;3)DC268_11	s/Y; Dp(1;3)DC268_11_2
s/Y; Dp(1;3)DC268	60	11	3	s/Y; Dp(1;3)DC268_11	s/Y; Dp(1;3)DC268_11_3
s/Y; Dp(1;3)DC268	67	11	4	s/Y; Dp(1;3)DC268_11	s/Y; Dp(1;3)DC268_11_4
s/Y; Dp(1;3)DC268	54	11	5	s/Y; Dp(1;3)DC268_11	s/Y; Dp(1;3)DC268_11_5
s/Y; Dp(1;3)DC268	59	11	6	s/Y; Dp(1;3)DC268_11	s/Y; Dp(1;3)DC268_11_6
s/Y; Dp(1;3)DC268	75	11	7	s/Y; Dp(1;3)DC268_11	s/Y; Dp(1;3)DC268_11_7
s/Y; Dp(1;3)DC268	72	11	8	s/Y; Dp(1;3)DC268_11	s/Y; Dp(1;3)DC268_11_8
s/Y; Dp(1;3)DC268	74	11	9	s/Y; Dp(1;3)DC268_11	s/Y; Dp(1;3)DC268_11_9
s/Y; Dp(1;3)DC268	63	11	10	s/Y; Dp(1;3)DC268_11	s/Y; Dp(1;3)DC268_11_10
s/Y; Dp(1;3)DC268	72	11	11	s/Y; Dp(1;3)DC268_11	s/Y; Dp(1;3)DC268_11_11
s/Y; Dp(1;3)DC268	56	11	12	s/Y; Dp(1;3)DC268_11	s/Y; Dp(1;3)DC268_11_12
s/Y; Dp(1;3)DC268	68	11	13	s/Y; Dp(1;3)DC268_11	s/Y; Dp(1;3)DC268_11_13
s/Y; Dp(1;3)DC268	67	11	14	s/Y; Dp(1;3)DC268_11	s/Y; Dp(1;3)DC268_11_14
s/Y; Dp(1;3)DC268	73	11	15	s/Y; Dp(1;3)DC268_11	s/Y; Dp(1;3)DC268_11_15
s/Y; Dp(1;3)DC268	68	11	16	s/Y; Dp(1;3)DC268_11	s/Y; Dp(1;3)DC268_11_16
s/Y; Dp(1;3)DC268	73	11	17	s/Y; Dp(1;3)DC268_11	s/Y; Dp(1;3)DC268_11_17
s/Y; Dp(1;3)DC268	72	11	18	s/Y; Dp(1;3)DC268_11	s/Y; Dp(1;3)DC268_11_18
s/Y; Dp(1;3)DC268	70	11	19	s/Y; Dp(1;3)DC268_11	s/Y; Dp(1;3)DC268_11_19
s/Y; Dp(1;3)DC268	60	11	20	s/Y; Dp(1;3)DC268_11	s/Y; Dp(1;3)DC268_11_20
s/Y; Dp(1;3)DC268	68	12	1	s/Y; Dp(1;3)DC268_12	s/Y; Dp(1;3)DC268_12_1
s/Y; Dp(1;3)DC268	69	12	2	s/Y; Dp(1;3)DC268_12	s/Y; Dp(1;3)DC268_12_2
s/Y; Dp(1;3)DC268	65	12	3	s/Y; Dp(1;3)DC268_12	s/Y; Dp(1;3)DC268_12_3
s/Y; Dp(1;3)DC268	70	12	4	s/Y; Dp(1;3)DC268_12	s/Y; Dp(1;3)DC268_12_4
s/Y; Dp(1;3)DC268	78	12	5	s/Y; Dp(1;3)DC268_12	s/Y; Dp(1;3)DC268_12_5
s/Y; Dp(1;3)DC268	66	12	6	s/Y; Dp(1;3)DC268_12	s/Y; Dp(1;3)DC268_12_6
s/Y; Dp(1;3)DC268	60	12	7	s/Y; Dp(1;3)DC268_12	s/Y; Dp(1;3)DC268_12_7
s/Y; Dp(1;3)DC268	71	12	8	s/Y; Dp(1;3)DC268_12	s/Y; Dp(1;3)DC268_12_8
s/Y; Dp(1;3)DC268	70	12	9	s/Y; Dp(1;3)DC268_12	s/Y; Dp(1;3)DC268_12_9
s/Y; Dp(1;3)DC268	74	12	10	s/Y; Dp(1;3)DC268_12	s/Y; Dp(1;3)DC268_12_10
s/Y; Dp(1;3)DC268	70	12	11	s/Y; Dp(1;3)DC268_12	s/Y; Dp(1;3)DC268_12_11
s/Y; Dp(1;3)DC268	61	12	12	s/Y; Dp(1;3)DC268_12	s/Y; Dp(1;3)DC268_12_12
s/Y; Dp(1;3)DC268	68	12	13	s/Y; Dp(1;3)DC268_12	s/Y; Dp(1;3)DC268_12_13
s/Y; Dp(1;3)DC268	72	12	14	s/Y; Dp(1;3)DC268_12	s/Y; Dp(1;3)DC268_12_14
s/Y; Dp(1;3)DC268	65	12	15	s/Y; Dp(1;3)DC268_12	s/Y; Dp(1;3)DC268_12_15
s/Y; Dp(1;3)DC268	70	12	16	s/Y; Dp(1;3)DC268_12	s/Y; Dp(1;3)DC268_12_16
s/Y; Dp(1;3)DC268	56	12	17	s/Y; Dp(1;3)DC268_12	s/Y; Dp(1;3)DC268_12_17
s/Y; Dp(1;3)DC268	71	12	18	s/Y; Dp(1;3)DC268_12	s/Y; Dp(1;3)DC268_12_18
s/Y; Dp(1;3)DC268	67	12	19	s/Y; Dp(1;3)DC268_12	s/Y; Dp(1;3)DC268_12_19
s/Y; Dp(1;3)DC268	77	12	20	s/Y; Dp(1;3)DC268_12	s/Y; Dp(1;3)DC268_12_20
s/Y; Dp(1;3)DC268	58	13	1	s/Y; Dp(1;3)DC268_13	s/Y; Dp(1;3)DC268_13_1
s/Y; Dp(1;3)DC268	77	13	2	s/Y; Dp(1;3)DC268_13	s/Y; Dp(1;3)DC268_13_2
s/Y; Dp(1;3)DC268	59	13	3	s/Y; Dp(1;3)DC268_13	s/Y; Dp(1;3)DC268_13_3
s/Y; Dp(1;3)DC268	59	13	4	s/Y; Dp(1;3)DC268_13	s/Y; Dp(1;3)DC268_13_4
s/Y; Dp(1;3)DC268	63	13	5	s/Y; Dp(1;3)DC268_13	s/Y; Dp(1;3)DC268_13_5
s/Y; Dp(1;3)DC268	61	13	6	s/Y; Dp(1;3)DC268_13	s/Y; Dp(1;3)DC268_13_6
s/Y; Dp(1;3)DC268	79	13	7	s/Y; Dp(1;3)DC268_13	s/Y; Dp(1;3)DC268_13_7
s/Y; Dp(1;3)DC268	59	13	8	s/Y; Dp(1;3)DC268_13	s/Y; Dp(1;3)DC268_13_8
s/Y; Dp(1;3)DC268	54	13	9	s/Y; Dp(1;3)DC268_13	s/Y; Dp(1;3)DC268_13_9
s/Y; Dp(1;3)DC268	62	13	10	s/Y; Dp(1;3)DC268_13	s/Y; Dp(1;3)DC268_13_10
s/Y; Dp(1;3)DC268	52	13	11	s/Y; Dp(1;3)DC268_13	s/Y; Dp(1;3)DC268_13_11
s/Y; Dp(1;3)DC268	49	13	12	s/Y; Dp(1;3)DC268_13	s/Y; Dp(1;3)DC268_13_12
s/Y; Dp(1;3)DC268	73	13	13	s/Y; Dp(1;3)DC268_13	s/Y; Dp(1;3)DC268_13_13
s/Y; Dp(1;3)DC268	47	13	14	s/Y; Dp(1;3)DC268_13	s/Y; Dp(1;3)DC268_13_14
s/Y; Dp(1;3)DC268	54	13	15	s/Y; Dp(1;3)DC268_13	s/Y; Dp(1;3)DC268_13_15
s/Y; Dp(1;3)DC268	41	13	16	s/Y; Dp(1;3)DC268_13	s/Y; Dp(1;3)DC268_13_16
s/Y; Dp(1;3)DC268	71	13	17	s/Y; Dp(1;3)DC268_13	s/Y; Dp(1;3)DC268_13_17
s/Y; Dp(1;3)DC268	66	13	18	s/Y; Dp(1;3)DC268_13	s/Y; Dp(1;3)DC268_13_18
s/Y; Dp(1;3)DC268	68	13	19	s/Y; Dp(1;3)DC268_13	s/Y; Dp(1;3)DC268_13_19
s/Y; Dp(1;3)DC268	71	13	20	s/Y; Dp(1;3)DC268_13	s/Y; Dp(1;3)DC268_13_20
s/Y; Dp(1;3)DC268	59	14	1	s/Y; Dp(1;3)DC268_14	s/Y; Dp(1;3)DC268_14_1
s/Y; Dp(1;3)DC268	79	14	2	s/Y; Dp(1;3)DC268_14	s/Y; Dp(1;3)DC268_14_2
s/Y; Dp(1;3)DC268	75	14	3	s/Y; Dp(1;3)DC268_14	s/Y; Dp(1;3)DC268_14_3
s/Y; Dp(1;3)DC268	66	14	4	s/Y; Dp(1;3)DC268_14	s/Y; Dp(1;3)DC268_14_4
s/Y; Dp(1;3)DC268	67	14	5	s/Y; Dp(1;3)DC268_14	s/Y; Dp(1;3)DC268_14_5
s/Y; Dp(1;3)DC268	81	14	6	s/Y; Dp(1;3)DC268_14	s/Y; Dp(1;3)DC268_14_6
s/Y; Dp(1;3)DC268	56	14	7	s/Y; Dp(1;3)DC268_14	s/Y; Dp(1;3)DC268_14_7
s/Y; Dp(1;3)DC268	85	14	8	s/Y; Dp(1;3)DC268_14	s/Y; Dp(1;3)DC268_14_8
s/Y; Dp(1;3)DC268	88	14	9	s/Y; Dp(1;3)DC268_14	s/Y; Dp(1;3)DC268_14_9
s/Y; Dp(1;3)DC268	78	14	10	s/Y; Dp(1;3)DC268_14	s/Y; Dp(1;3)DC268_14_10
s/Y; Dp(1;3)DC268	75	14	11	s/Y; Dp(1;3)DC268_14	s/Y; Dp(1;3)DC268_14_11
s/Y; Dp(1;3)DC268	77	14	12	s/Y; Dp(1;3)DC268_14	s/Y; Dp(1;3)DC268_14_12
s/Y; Dp(1;3)DC268	75	14	13	s/Y; Dp(1;3)DC268_14	s/Y; Dp(1;3)DC268_14_13
s/Y; Dp(1;3)DC268	77	14	14	s/Y; Dp(1;3)DC268_14	s/Y; Dp(1;3)DC268_14_14
s/Y; Dp(1;3)DC268	74	14	15	s/Y; Dp(1;3)DC268_14	s/Y; Dp(1;3)DC268_14_15
s/Y; Dp(1;3)DC268	77	14	16	s/Y; Dp(1;3)DC268_14	s/Y; Dp(1;3)DC268_14_16
s/Y; Dp(1;3)DC268	82	14	17	s/Y; Dp(1;3)DC268_14	s/Y; Dp(1;3)DC268_14_17
s/Y; Dp(1;3)DC268	79	14	18	s/Y; Dp(1;3)DC268_14	s/Y; Dp(1;3)DC268_14_18
s/Y; Dp(1;3)DC268	66	14	19	s/Y; Dp(1;3)DC268_14	s/Y; Dp(1;3)DC268_14_19
s/Y; Dp(1;3)DC268	74	14	20	s/Y; Dp(1;3)DC268_14	s/Y; Dp(1;3)DC268_14_20
s/Y; Dp(1;3)DC268	64	15	1	s/Y; Dp(1;3)DC268_15	s/Y; Dp(1;3)DC268_15_1
s/Y; Dp(1;3)DC268	78	15	2	s/Y; Dp(1;3)DC268_15	s/Y; Dp(1;3)DC268_15_2
s/Y; Dp(1;3)DC268	63	15	3	s/Y; Dp(1;3)DC268_15	s/Y; Dp(1;3)DC268_15_3
s/Y; Dp(1;3)DC268	65	15	4	s/Y; Dp(1;3)DC268_15	s/Y; Dp(1;3)DC268_15_4
s/Y; Dp(1;3)DC268	67	15	5	s/Y; Dp(1;3)DC268_15	s/Y; Dp(1;3)DC268_15_5
s/Y; Dp(1;3)DC268	74	15	6	s/Y; Dp(1;3)DC268_15	s/Y; Dp(1;3)DC268_15_6
s/Y; Dp(1;3)DC268	79	15	7	s/Y; Dp(1;3)DC268_15	s/Y; Dp(1;3)DC268_15_7
s/Y; Dp(1;3)DC268	77	15	8	s/Y; Dp(1;3)DC268_15	s/Y; Dp(1;3)DC268_15_8
s/Y; Dp(1;3)DC268	56	15	9	s/Y; Dp(1;3)DC268_15	s/Y; Dp(1;3)DC268_15_9
s/Y; Dp(1;3)DC268	72	15	10	s/Y; Dp(1;3)DC268_15	s/Y; Dp(1;3)DC268_15_10
s/Y; Dp(1;3)DC268	72	15	11	s/Y; Dp(1;3)DC268_15	s/Y; Dp(1;3)DC268_15_11
s/Y; Dp(1;3)DC268	74	15	12	s/Y; Dp(1;3)DC268_15	s/Y; Dp(1;3)DC268_15_12
s/Y; Dp(1;3)DC268	63	15	13	s/Y; Dp(1;3)DC268_15	s/Y; Dp(1;3)DC268_15_13
s/Y; Dp(1;3)DC268	65	15	14	s/Y; Dp(1;3)DC268_15	s/Y; Dp(1;3)DC268_15_14
s/Y; Dp(1;3)DC268	68	15	15	s/Y; Dp(1;3)DC268_15	s/Y; Dp(1;3)DC268_15_15
s/Y; Dp(1;3)DC268	66	15	16	s/Y; Dp(1;3)DC268_15	s/Y; Dp(1;3)DC268_15_16
s/Y; Dp(1;3)DC268	77	15	17	s/Y; Dp(1;3)DC268_15	s/Y; Dp(1;3)DC268_15_17
s/Y; Dp(1;3)DC268	61	15	18	s/Y; Dp(1;3)DC268_15	s/Y; Dp(1;3)DC268_15_18
s/Y; Dp(1;3)DC268	68	15	19	s/Y; Dp(1;3)DC268_15	s/Y; Dp(1;3)DC268_15_19
s/Y; Dp(1;3)DC268	66	15	20	s/Y; Dp(1;3)DC268_15	s/Y; Dp(1;3)DC268_15_20
s/Y; Dp(1;3)DC269	62	1	1	s/Y; Dp(1;3)DC269_1	s/Y; Dp(1;3)DC269_1_1
s/Y; Dp(1;3)DC269	59	1	2	s/Y; Dp(1;3)DC269_1	s/Y; Dp(1;3)DC269_1_2
s/Y; Dp(1;3)DC269	59	1	3	s/Y; Dp(1;3)DC269_1	s/Y; Dp(1;3)DC269_1_3
s/Y; Dp(1;3)DC269	68	1	4	s/Y; Dp(1;3)DC269_1	s/Y; Dp(1;3)DC269_1_4
s/Y; Dp(1;3)DC269	59	1	5	s/Y; Dp(1;3)DC269_1	s/Y; Dp(1;3)DC269_1_5
s/Y; Dp(1;3)DC269	72	1	6	s/Y; Dp(1;3)DC269_1	s/Y; Dp(1;3)DC269_1_6
s/Y; Dp(1;3)DC269	57	1	7	s/Y; Dp(1;3)DC269_1	s/Y; Dp(1;3)DC269_1_7
s/Y; Dp(1;3)DC269	71	1	8	s/Y; Dp(1;3)DC269_1	s/Y; Dp(1;3)DC269_1_8
s/Y; Dp(1;3)DC269	60	1	9	s/Y; Dp(1;3)DC269_1	s/Y; Dp(1;3)DC269_1_9
s/Y; Dp(1;3)DC269	73	1	10	s/Y; Dp(1;3)DC269_1	s/Y; Dp(1;3)DC269_1_10
s/Y; Dp(1;3)DC269	62	1	11	s/Y; Dp(1;3)DC269_1	s/Y; Dp(1;3)DC269_1_11
s/Y; Dp(1;3)DC269	55	1	12	s/Y; Dp(1;3)DC269_1	s/Y; Dp(1;3)DC269_1_12
s/Y; Dp(1;3)DC269	52	1	13	s/Y; Dp(1;3)DC269_1	s/Y; Dp(1;3)DC269_1_13
s/Y; Dp(1;3)DC269	55	1	14	s/Y; Dp(1;3)DC269_1	s/Y; Dp(1;3)DC269_1_14
s/Y; Dp(1;3)DC269	65	1	15	s/Y; Dp(1;3)DC269_1	s/Y; Dp(1;3)DC269_1_15
s/Y; Dp(1;3)DC269	61	1	16	s/Y; Dp(1;3)DC269_1	s/Y; Dp(1;3)DC269_1_16
s/Y; Dp(1;3)DC269	63	1	17	s/Y; Dp(1;3)DC269_1	s/Y; Dp(1;3)DC269_1_17
s/Y; Dp(1;3)DC269	55	1	18	s/Y; Dp(1;3)DC269_1	s/Y; Dp(1;3)DC269_1_18
s/Y; Dp(1;3)DC269	63	1	19	s/Y; Dp(1;3)DC269_1	s/Y; Dp(1;3)DC269_1_19
s/Y; Dp(1;3)DC269	70	1	20	s/Y; Dp(1;3)DC269_1	s/Y; Dp(1;3)DC269_1_20
s/Y; Dp(1;3)DC269	58	2	1	s/Y; Dp(1;3)DC269_2	s/Y; Dp(1;3)DC269_2_1
s/Y; Dp(1;3)DC269	67	2	2	s/Y; Dp(1;3)DC269_2	s/Y; Dp(1;3)DC269_2_2
s/Y; Dp(1;3)DC269	64	2	3	s/Y; Dp(1;3)DC269_2	s/Y; Dp(1;3)DC269_2_3
s/Y; Dp(1;3)DC269	61	2	4	s/Y; Dp(1;3)DC269_2	s/Y; Dp(1;3)DC269_2_4
s/Y; Dp(1;3)DC269	63	2	5	s/Y; Dp(1;3)DC269_2	s/Y; Dp(1;3)DC269_2_5
s/Y; Dp(1;3)DC269	81	2	6	s/Y; Dp(1;3)DC269_2	s/Y; Dp(1;3)DC269_2_6
s/Y; Dp(1;3)DC269	59	2	7	s/Y; Dp(1;3)DC269_2	s/Y; Dp(1;3)DC269_2_7
s/Y; Dp(1;3)DC269	60	2	8	s/Y; Dp(1;3)DC269_2	s/Y; Dp(1;3)DC269_2_8
s/Y; Dp(1;3)DC269	66	2	9	s/Y; Dp(1;3)DC269_2	s/Y; Dp(1;3)DC269_2_9
s/Y; Dp(1;3)DC269	73	2	10	s/Y; Dp(1;3)DC269_2	s/Y; Dp(1;3)DC269_2_10
s/Y; Dp(1;3)DC269	65	2	11	s/Y; Dp(1;3)DC269_2	s/Y; Dp(1;3)DC269_2_11
s/Y; Dp(1;3)DC269	69	2	12	s/Y; Dp(1;3)DC269_2	s/Y; Dp(1;3)DC269_2_12
s/Y; Dp(1;3)DC269	68	2	13	s/Y; Dp(1;3)DC269_2	s/Y; Dp(1;3)DC269_2_13
s/Y; Dp(1;3)DC269	69	2	14	s/Y; Dp(1;3)DC269_2	s/Y; Dp(1;3)DC269_2_14
s/Y; Dp(1;3)DC269	72	2	15	s/Y; Dp(1;3)DC269_2	s/Y; Dp(1;3)DC269_2_15
s/Y; Dp(1;3)DC269	76	2	16	s/Y; Dp(1;3)DC269_2	s/Y; Dp(1;3)DC269_2_16
s/Y; Dp(1;3)DC269	76	2	17	s/Y; Dp(1;3)DC269_2	s/Y; Dp(1;3)DC269_2_17
s/Y; Dp(1;3)DC269	72	2	18	s/Y; Dp(1;3)DC269_2	s/Y; Dp(1;3)DC269_2_18
s/Y; Dp(1;3)DC269	72	2	19	s/Y; Dp(1;3)DC269_2	s/Y; Dp(1;3)DC269_2_19
s/Y; Dp(1;3)DC269	80	2	20	s/Y; Dp(1;3)DC269_2	s/Y; Dp(1;3)DC269_2_20
s/Y; Dp(1;3)DC269	70	3	1	s/Y; Dp(1;3)DC269_3	s/Y; Dp(1;3)DC269_3_1
s/Y; Dp(1;3)DC269	71	3	2	s/Y; Dp(1;3)DC269_3	s/Y; Dp(1;3)DC269_3_2
s/Y; Dp(1;3)DC269	62	3	3	s/Y; Dp(1;3)DC269_3	s/Y; Dp(1;3)DC269_3_3
s/Y; Dp(1;3)DC269	75	3	4	s/Y; Dp(1;3)DC269_3	s/Y; Dp(1;3)DC269_3_4
s/Y; Dp(1;3)DC269	70	3	5	s/Y; Dp(1;3)DC269_3	s/Y; Dp(1;3)DC269_3_5
s/Y; Dp(1;3)DC269	74	3	6	s/Y; Dp(1;3)DC269_3	s/Y; Dp(1;3)DC269_3_6
s/Y; Dp(1;3)DC269	71	3	7	s/Y; Dp(1;3)DC269_3	s/Y; Dp(1;3)DC269_3_7
s/Y; Dp(1;3)DC269	63	3	8	s/Y; Dp(1;3)DC269_3	s/Y; Dp(1;3)DC269_3_8
s/Y; Dp(1;3)DC269	69	3	9	s/Y; Dp(1;3)DC269_3	s/Y; Dp(1;3)DC269_3_9
s/Y; Dp(1;3)DC269	75	3	10	s/Y; Dp(1;3)DC269_3	s/Y; Dp(1;3)DC269_3_10
s/Y; Dp(1;3)DC269	86	3	11	s/Y; Dp(1;3)DC269_3	s/Y; Dp(1;3)DC269_3_11
s/Y; Dp(1;3)DC269	84	3	12	s/Y; Dp(1;3)DC269_3	s/Y; Dp(1;3)DC269_3_12
s/Y; Dp(1;3)DC269	67	3	13	s/Y; Dp(1;3)DC269_3	s/Y; Dp(1;3)DC269_3_13
s/Y; Dp(1;3)DC269	68	3	14	s/Y; Dp(1;3)DC269_3	s/Y; Dp(1;3)DC269_3_14
s/Y; Dp(1;3)DC269	68	3	15	s/Y; Dp(1;3)DC269_3	s/Y; Dp(1;3)DC269_3_15
s/Y; Dp(1;3)DC269	68	3	16	s/Y; Dp(1;3)DC269_3	s/Y; Dp(1;3)DC269_3_16
s/Y; Dp(1;3)DC269	66	3	17	s/Y; Dp(1;3)DC269_3	s/Y; Dp(1;3)DC269_3_17
s/Y; Dp(1;3)DC269	77	3	18	s/Y; Dp(1;3)DC269_3	s/Y; Dp(1;3)DC269_3_18
s/Y; Dp(1;3)DC269	69	3	19	s/Y; Dp(1;3)DC269_3	s/Y; Dp(1;3)DC269_3_19
s/Y; Dp(1;3)DC269	77	3	20	s/Y; Dp(1;3)DC269_3	s/Y; Dp(1;3)DC269_3_20
s/Y; Dp(1;3)DC269	70	4	1	s/Y; Dp(1;3)DC269_4	s/Y; Dp(1;3)DC269_4_1
s/Y; Dp(1;3)DC269	69	4	2	s/Y; Dp(1;3)DC269_4	s/Y; Dp(1;3)DC269_4_2
s/Y; Dp(1;3)DC269	67	4	3	s/Y; Dp(1;3)DC269_4	s/Y; Dp(1;3)DC269_4_3
s/Y; Dp(1;3)DC269	67	4	4	s/Y; Dp(1;3)DC269_4	s/Y; Dp(1;3)DC269_4_4
s/Y; Dp(1;3)DC269	70	4	5	s/Y; Dp(1;3)DC269_4	s/Y; Dp(1;3)DC269_4_5
s/Y; Dp(1;3)DC269	62	4	6	s/Y; Dp(1;3)DC269_4	s/Y; Dp(1;3)DC269_4_6
s/Y; Dp(1;3)DC269	71	4	7	s/Y; Dp(1;3)DC269_4	s/Y; Dp(1;3)DC269_4_7
s/Y; Dp(1;3)DC269	67	4	8	s/Y; Dp(1;3)DC269_4	s/Y; Dp(1;3)DC269_4_8
s/Y; Dp(1;3)DC269	85	4	9	s/Y; Dp(1;3)DC269_4	s/Y; Dp(1;3)DC269_4_9
s/Y; Dp(1;3)DC269	69	4	10	s/Y; Dp(1;3)DC269_4	s/Y; Dp(1;3)DC269_4_10
s/Y; Dp(1;3)DC269	70	4	11	s/Y; Dp(1;3)DC269_4	s/Y; Dp(1;3)DC269_4_11
s/Y; Dp(1;3)DC269	76	4	12	s/Y; Dp(1;3)DC269_4	s/Y; Dp(1;3)DC269_4_12
s/Y; Dp(1;3)DC269	82	4	13	s/Y; Dp(1;3)DC269_4	s/Y; Dp(1;3)DC269_4_13
s/Y; Dp(1;3)DC269	84	4	14	s/Y; Dp(1;3)DC269_4	s/Y; Dp(1;3)DC269_4_14
s/Y; Dp(1;3)DC269	76	4	15	s/Y; Dp(1;3)DC269_4	s/Y; Dp(1;3)DC269_4_15
s/Y; Dp(1;3)DC269	68	4	16	s/Y; Dp(1;3)DC269_4	s/Y; Dp(1;3)DC269_4_16
s/Y; Dp(1;3)DC269	68	4	17	s/Y; Dp(1;3)DC269_4	s/Y; Dp(1;3)DC269_4_17
s/Y; Dp(1;3)DC269	80	4	18	s/Y; Dp(1;3)DC269_4	s/Y; Dp(1;3)DC269_4_18
s/Y; Dp(1;3)DC269	65	4	19	s/Y; Dp(1;3)DC269_4	s/Y; Dp(1;3)DC269_4_19
s/Y; Dp(1;3)DC269	57	4	20	s/Y; Dp(1;3)DC269_4	s/Y; Dp(1;3)DC269_4_20
s/Y; Dp(1;3)DC269	63	5	1	s/Y; Dp(1;3)DC269_5	s/Y; Dp(1;3)DC269_5_1
s/Y; Dp(1;3)DC269	63	5	2	s/Y; Dp(1;3)DC269_5	s/Y; Dp(1;3)DC269_5_2
s/Y; Dp(1;3)DC269	65	5	3	s/Y; Dp(1;3)DC269_5	s/Y; Dp(1;3)DC269_5_3
s/Y; Dp(1;3)DC269	66	5	4	s/Y; Dp(1;3)DC269_5	s/Y; Dp(1;3)DC269_5_4
s/Y; Dp(1;3)DC269	66	5	5	s/Y; Dp(1;3)DC269_5	s/Y; Dp(1;3)DC269_5_5
s/Y; Dp(1;3)DC269	68	5	6	s/Y; Dp(1;3)DC269_5	s/Y; Dp(1;3)DC269_5_6
s/Y; Dp(1;3)DC269	66	5	7	s/Y; Dp(1;3)DC269_5	s/Y; Dp(1;3)DC269_5_7
s/Y; Dp(1;3)DC269	65	5	8	s/Y; Dp(1;3)DC269_5	s/Y; Dp(1;3)DC269_5_8
s/Y; Dp(1;3)DC269	65	5	9	s/Y; Dp(1;3)DC269_5	s/Y; Dp(1;3)DC269_5_9
s/Y; Dp(1;3)DC269	72	5	10	s/Y; Dp(1;3)DC269_5	s/Y; Dp(1;3)DC269_5_10
s/Y; Dp(1;3)DC269	76	5	11	s/Y; Dp(1;3)DC269_5	s/Y; Dp(1;3)DC269_5_11
s/Y; Dp(1;3)DC269	80	5	12	s/Y; Dp(1;3)DC269_5	s/Y; Dp(1;3)DC269_5_12
s/Y; Dp(1;3)DC269	63	5	13	s/Y; Dp(1;3)DC269_5	s/Y; Dp(1;3)DC269_5_13
s/Y; Dp(1;3)DC269	64	5	14	s/Y; Dp(1;3)DC269_5	s/Y; Dp(1;3)DC269_5_14
s/Y; Dp(1;3)DC269	77	5	15	s/Y; Dp(1;3)DC269_5	s/Y; Dp(1;3)DC269_5_15
s/Y; Dp(1;3)DC269	80	5	16	s/Y; Dp(1;3)DC269_5	s/Y; Dp(1;3)DC269_5_16
s/Y; Dp(1;3)DC269	72	5	17	s/Y; Dp(1;3)DC269_5	s/Y; Dp(1;3)DC269_5_17
s/Y; Dp(1;3)DC269	72	5	18	s/Y; Dp(1;3)DC269_5	s/Y; Dp(1;3)DC269_5_18
s/Y; Dp(1;3)DC269	60	5	19	s/Y; Dp(1;3)DC269_5	s/Y; Dp(1;3)DC269_5_19
s/Y; Dp(1;3)DC269	61	5	20	s/Y; Dp(1;3)DC269_5	s/Y; Dp(1;3)DC269_5_20
s/Y; Dp(1;3)DC269	79	6	1	s/Y; Dp(1;3)DC269_6	s/Y; Dp(1;3)DC269_6_1
s/Y; Dp(1;3)DC269	71	6	2	s/Y; Dp(1;3)DC269_6	s/Y; Dp(1;3)DC269_6_2
s/Y; Dp(1;3)DC269	63	6	3	s/Y; Dp(1;3)DC269_6	s/Y; Dp(1;3)DC269_6_3
s/Y; Dp(1;3)DC269	57	6	4	s/Y; Dp(1;3)DC269_6	s/Y; Dp(1;3)DC269_6_4
s/Y; Dp(1;3)DC269	68	6	5	s/Y; Dp(1;3)DC269_6	s/Y; Dp(1;3)DC269_6_5
s/Y; Dp(1;3)DC269	70	6	6	s/Y; Dp(1;3)DC269_6	s/Y; Dp(1;3)DC269_6_6
s/Y; Dp(1;3)DC269	76	6	7	s/Y; Dp(1;3)DC269_6	s/Y; Dp(1;3)DC269_6_7
s/Y; Dp(1;3)DC269	78	6	8	s/Y; Dp(1;3)DC269_6	s/Y; Dp(1;3)DC269_6_8
s/Y; Dp(1;3)DC269	66	6	9	s/Y; Dp(1;3)DC269_6	s/Y; Dp(1;3)DC269_6_9
s/Y; Dp(1;3)DC269	68	6	10	s/Y; Dp(1;3)DC269_6	s/Y; Dp(1;3)DC269_6_10
s/Y; Dp(1;3)DC269	79	6	11	s/Y; Dp(1;3)DC269_6	s/Y; Dp(1;3)DC269_6_11
s/Y; Dp(1;3)DC269	61	6	12	s/Y; Dp(1;3)DC269_6	s/Y; Dp(1;3)DC269_6_12
s/Y; Dp(1;3)DC269	55	6	13	s/Y; Dp(1;3)DC269_6	s/Y; Dp(1;3)DC269_6_13
s/Y; Dp(1;3)DC269	63	6	14	s/Y; Dp(1;3)DC269_6	s/Y; Dp(1;3)DC269_6_14
s/Y; Dp(1;3)DC269	78	6	15	s/Y; Dp(1;3)DC269_6	s/Y; Dp(1;3)DC269_6_15
s/Y; Dp(1;3)DC269	63	6	16	s/Y; Dp(1;3)DC269_6	s/Y; Dp(1;3)DC269_6_16
s/Y; Dp(1;3)DC269	69	6	17	s/Y; Dp(1;3)DC269_6	s/Y; Dp(1;3)DC269_6_17
s/Y; Dp(1;3)DC269	61	6	18	s/Y; Dp(1;3)DC269_6	s/Y; Dp(1;3)DC269_6_18
s/Y; Dp(1;3)DC269	67	6	19	s/Y; Dp(1;3)DC269_6	s/Y; Dp(1;3)DC269_6_19
s/Y; Dp(1;3)DC269	75	6	20	s/Y; Dp(1;3)DC269_6	s/Y; Dp(1;3)DC269_6_20
s/Y; Dp(1;3)DC269	67	7	1	s/Y; Dp(1;3)DC269_7	s/Y; Dp(1;3)DC269_7_1
s/Y; Dp(1;3)DC269	58	7	2	s/Y; Dp(1;3)DC269_7	s/Y; Dp(1;3)DC269_7_2
s/Y; Dp(1;3)DC269	67	7	3	s/Y; Dp(1;3)DC269_7	s/Y; Dp(1;3)DC269_7_3
s/Y; Dp(1;3)DC269	49	7	4	s/Y; Dp(1;3)DC269_7	s/Y; Dp(1;3)DC269_7_4
s/Y; Dp(1;3)DC269	53	7	5	s/Y; Dp(1;3)DC269_7	s/Y; Dp(1;3)DC269_7_5
s/Y; Dp(1;3)DC269	56	7	6	s/Y; Dp(1;3)DC269_7	s/Y; Dp(1;3)DC269_7_6
s/Y; Dp(1;3)DC269	64	7	7	s/Y; Dp(1;3)DC269_7	s/Y; Dp(1;3)DC269_7_7
s/Y; Dp(1;3)DC269	46	7	8	s/Y; Dp(1;3)DC269_7	s/Y; Dp(1;3)DC269_7_8
s/Y; Dp(1;3)DC269	54	7	9	s/Y; Dp(1;3)DC269_7	s/Y; Dp(1;3)DC269_7_9
s/Y; Dp(1;3)DC269	64	7	10	s/Y; Dp(1;3)DC269_7	s/Y; Dp(1;3)DC269_7_10
s/Y; Dp(1;3)DC269	58	7	11	s/Y; Dp(1;3)DC269_7	s/Y; Dp(1;3)DC269_7_11
s/Y; Dp(1;3)DC269	67	7	12	s/Y; Dp(1;3)DC269_7	s/Y; Dp(1;3)DC269_7_12
s/Y; Dp(1;3)DC269	66	7	13	s/Y; Dp(1;3)DC269_7	s/Y; Dp(1;3)DC269_7_13
s/Y; Dp(1;3)DC269	64	7	14	s/Y; Dp(1;3)DC269_7	s/Y; Dp(1;3)DC269_7_14
s/Y; Dp(1;3)DC269	61	7	15	s/Y; Dp(1;3)DC269_7	s/Y; Dp(1;3)DC269_7_15
s/Y; Dp(1;3)DC269	65	7	16	s/Y; Dp(1;3)DC269_7	s/Y; Dp(1;3)DC269_7_16
s/Y; Dp(1;3)DC269	48	7	17	s/Y; Dp(1;3)DC269_7	s/Y; Dp(1;3)DC269_7_17
s/Y; Dp(1;3)DC269	64	7	18	s/Y; Dp(1;3)DC269_7	s/Y; Dp(1;3)DC269_7_18
s/Y; Dp(1;3)DC269	69	7	19	s/Y; Dp(1;3)DC269_7	s/Y; Dp(1;3)DC269_7_19
s/Y; Dp(1;3)DC269	48	7	20	s/Y; Dp(1;3)DC269_7	s/Y; Dp(1;3)DC269_7_20
s/Y; Dp(1;3)DC269	49	8	1	s/Y; Dp(1;3)DC269_8	s/Y; Dp(1;3)DC269_8_1
s/Y; Dp(1;3)DC269	70	8	2	s/Y; Dp(1;3)DC269_8	s/Y; Dp(1;3)DC269_8_2
s/Y; Dp(1;3)DC269	61	8	3	s/Y; Dp(1;3)DC269_8	s/Y; Dp(1;3)DC269_8_3
s/Y; Dp(1;3)DC269	77	8	4	s/Y; Dp(1;3)DC269_8	s/Y; Dp(1;3)DC269_8_4
s/Y; Dp(1;3)DC269	62	8	5	s/Y; Dp(1;3)DC269_8	s/Y; Dp(1;3)DC269_8_5
s/Y; Dp(1;3)DC269	70	8	6	s/Y; Dp(1;3)DC269_8	s/Y; Dp(1;3)DC269_8_6
s/Y; Dp(1;3)DC269	65	8	7	s/Y; Dp(1;3)DC269_8	s/Y; Dp(1;3)DC269_8_7
s/Y; Dp(1;3)DC269	65	8	8	s/Y; Dp(1;3)DC269_8	s/Y; Dp(1;3)DC269_8_8
s/Y; Dp(1;3)DC269	63	8	9	s/Y; Dp(1;3)DC269_8	s/Y; Dp(1;3)DC269_8_9
s/Y; Dp(1;3)DC269	47	8	10	s/Y; Dp(1;3)DC269_8	s/Y; Dp(1;3)DC269_8_10
s/Y; Dp(1;3)DC269	62	8	11	s/Y; Dp(1;3)DC269_8	s/Y; Dp(1;3)DC269_8_11
s/Y; Dp(1;3)DC269	53	8	12	s/Y; Dp(1;3)DC269_8	s/Y; Dp(1;3)DC269_8_12
s/Y; Dp(1;3)DC269	60	8	13	s/Y; Dp(1;3)DC269_8	s/Y; Dp(1;3)DC269_8_13
s/Y; Dp(1;3)DC269	59	8	14	s/Y; Dp(1;3)DC269_8	s/Y; Dp(1;3)DC269_8_14
s/Y; Dp(1;3)DC269	54	8	15	s/Y; Dp(1;3)DC269_8	s/Y; Dp(1;3)DC269_8_15
s/Y; Dp(1;3)DC269	65	8	16	s/Y; Dp(1;3)DC269_8	s/Y; Dp(1;3)DC269_8_16
s/Y; Dp(1;3)DC269	72	8	17	s/Y; Dp(1;3)DC269_8	s/Y; Dp(1;3)DC269_8_17
s/Y; Dp(1;3)DC269	69	8	18	s/Y; Dp(1;3)DC269_8	s/Y; Dp(1;3)DC269_8_18
s/Y; Dp(1;3)DC269	55	8	19	s/Y; Dp(1;3)DC269_8	s/Y; Dp(1;3)DC269_8_19
s/Y; Dp(1;3)DC269	69	8	20	s/Y; Dp(1;3)DC269_8	s/Y; Dp(1;3)DC269_8_20
s/Y; Dp(1;3)DC269	66	9	1	s/Y; Dp(1;3)DC269_9	s/Y; Dp(1;3)DC269_9_1
s/Y; Dp(1;3)DC269	76	9	2	s/Y; Dp(1;3)DC269_9	s/Y; Dp(1;3)DC269_9_2
s/Y; Dp(1;3)DC269	81	9	3	s/Y; Dp(1;3)DC269_9	s/Y; Dp(1;3)DC269_9_3
s/Y; Dp(1;3)DC269	81	9	4	s/Y; Dp(1;3)DC269_9	s/Y; Dp(1;3)DC269_9_4
s/Y; Dp(1;3)DC269	75	9	5	s/Y; Dp(1;3)DC269_9	s/Y; Dp(1;3)DC269_9_5
s/Y; Dp(1;3)DC269	81	9	6	s/Y; Dp(1;3)DC269_9	s/Y; Dp(1;3)DC269_9_6
s/Y; Dp(1;3)DC269	65	9	7	s/Y; Dp(1;3)DC269_9	s/Y; Dp(1;3)DC269_9_7
s/Y; Dp(1;3)DC269	66	9	8	s/Y; Dp(1;3)DC269_9	s/Y; Dp(1;3)DC269_9_8
s/Y; Dp(1;3)DC269	69	9	9	s/Y; Dp(1;3)DC269_9	s/Y; Dp(1;3)DC269_9_9
s/Y; Dp(1;3)DC269	79	9	10	s/Y; Dp(1;3)DC269_9	s/Y; Dp(1;3)DC269_9_10
s/Y; Dp(1;3)DC269	63	9	11	s/Y; Dp(1;3)DC269_9	s/Y; Dp(1;3)DC269_9_11
s/Y; Dp(1;3)DC269	71	9	12	s/Y; Dp(1;3)DC269_9	s/Y; Dp(1;3)DC269_9_12
s/Y; Dp(1;3)DC269	75	9	13	s/Y; Dp(1;3)DC269_9	s/Y; Dp(1;3)DC269_9_13
s/Y; Dp(1;3)DC269	71	9	14	s/Y; Dp(1;3)DC269_9	s/Y; Dp(1;3)DC269_9_14
s/Y; Dp(1;3)DC269	70	9	15	s/Y; Dp(1;3)DC269_9	s/Y; Dp(1;3)DC269_9_15
s/Y; Dp(1;3)DC269	74	9	16	s/Y; Dp(1;3)DC269_9	s/Y; Dp(1;3)DC269_9_16
s/Y; Dp(1;3)DC269	75	9	17	s/Y; Dp(1;3)DC269_9	s/Y; Dp(1;3)DC269_9_17
s/Y; Dp(1;3)DC269	66	9	18	s/Y; Dp(1;3)DC269_9	s/Y; Dp(1;3)DC269_9_18
s/Y; Dp(1;3)DC269	72	9	19	s/Y; Dp(1;3)DC269_9	s/Y; Dp(1;3)DC269_9_19
s/Y; Dp(1;3)DC269	64	9	20	s/Y; Dp(1;3)DC269_9	s/Y; Dp(1;3)DC269_9_20
s/Y; Dp(1;3)DC269	63	10	1	s/Y; Dp(1;3)DC269_10	s/Y; Dp(1;3)DC269_10_1
s/Y; Dp(1;3)DC269	71	10	2	s/Y; Dp(1;3)DC269_10	s/Y; Dp(1;3)DC269_10_2
s/Y; Dp(1;3)DC269	73	10	3	s/Y; Dp(1;3)DC269_10	s/Y; Dp(1;3)DC269_10_3
s/Y; Dp(1;3)DC269	74	10	4	s/Y; Dp(1;3)DC269_10	s/Y; Dp(1;3)DC269_10_4
s/Y; Dp(1;3)DC269	74	10	5	s/Y; Dp(1;3)DC269_10	s/Y; Dp(1;3)DC269_10_5
s/Y; Dp(1;3)DC269	78	10	6	s/Y; Dp(1;3)DC269_10	s/Y; Dp(1;3)DC269_10_6
s/Y; Dp(1;3)DC269	80	10	7	s/Y; Dp(1;3)DC269_10	s/Y; Dp(1;3)DC269_10_7
s/Y; Dp(1;3)DC269	81	10	8	s/Y; Dp(1;3)DC269_10	s/Y; Dp(1;3)DC269_10_8
s/Y; Dp(1;3)DC269	63	10	9	s/Y; Dp(1;3)DC269_10	s/Y; Dp(1;3)DC269_10_9
s/Y; Dp(1;3)DC269	82	10	10	s/Y; Dp(1;3)DC269_10	s/Y; Dp(1;3)DC269_10_10
s/Y; Dp(1;3)DC269	73	10	11	s/Y; Dp(1;3)DC269_10	s/Y; Dp(1;3)DC269_10_11
s/Y; Dp(1;3)DC269	74	10	12	s/Y; Dp(1;3)DC269_10	s/Y; Dp(1;3)DC269_10_12
s/Y; Dp(1;3)DC269	75	10	13	s/Y; Dp(1;3)DC269_10	s/Y; Dp(1;3)DC269_10_13
s/Y; Dp(1;3)DC269	72	10	14	s/Y; Dp(1;3)DC269_10	s/Y; Dp(1;3)DC269_10_14
s/Y; Dp(1;3)DC269	58	10	15	s/Y; Dp(1;3)DC269_10	s/Y; Dp(1;3)DC269_10_15
s/Y; Dp(1;3)DC269	69	10	16	s/Y; Dp(1;3)DC269_10	s/Y; Dp(1;3)DC269_10_16
s/Y; Dp(1;3)DC269	72	10	17	s/Y; Dp(1;3)DC269_10	s/Y; Dp(1;3)DC269_10_17
s/Y; Dp(1;3)DC269	83	10	18	s/Y; Dp(1;3)DC269_10	s/Y; Dp(1;3)DC269_10_18
s/Y; Dp(1;3)DC269	63	10	19	s/Y; Dp(1;3)DC269_10	s/Y; Dp(1;3)DC269_10_19
s/Y; Dp(1;3)DC269	87	10	20	s/Y; Dp(1;3)DC269_10	s/Y; Dp(1;3)DC269_10_20
s/Y; Dp(1;3)DC269	72	11	1	s/Y; Dp(1;3)DC269_11	s/Y; Dp(1;3)DC269_11_1
s/Y; Dp(1;3)DC269	66	11	2	s/Y; Dp(1;3)DC269_11	s/Y; Dp(1;3)DC269_11_2
s/Y; Dp(1;3)DC269	61	11	3	s/Y; Dp(1;3)DC269_11	s/Y; Dp(1;3)DC269_11_3
s/Y; Dp(1;3)DC269	66	11	4	s/Y; Dp(1;3)DC269_11	s/Y; Dp(1;3)DC269_11_4
s/Y; Dp(1;3)DC269	64	11	5	s/Y; Dp(1;3)DC269_11	s/Y; Dp(1;3)DC269_11_5
s/Y; Dp(1;3)DC269	68	11	6	s/Y; Dp(1;3)DC269_11	s/Y; Dp(1;3)DC269_11_6
s/Y; Dp(1;3)DC269	85	11	7	s/Y; Dp(1;3)DC269_11	s/Y; Dp(1;3)DC269_11_7
s/Y; Dp(1;3)DC269	70	11	8	s/Y; Dp(1;3)DC269_11	s/Y; Dp(1;3)DC269_11_8
s/Y; Dp(1;3)DC269	70	11	9	s/Y; Dp(1;3)DC269_11	s/Y; Dp(1;3)DC269_11_9
s/Y; Dp(1;3)DC269	69	11	10	s/Y; Dp(1;3)DC269_11	s/Y; Dp(1;3)DC269_11_10
s/Y; Dp(1;3)DC269	68	11	11	s/Y; Dp(1;3)DC269_11	s/Y; Dp(1;3)DC269_11_11
s/Y; Dp(1;3)DC269	78	11	12	s/Y; Dp(1;3)DC269_11	s/Y; Dp(1;3)DC269_11_12
s/Y; Dp(1;3)DC269	66	11	13	s/Y; Dp(1;3)DC269_11	s/Y; Dp(1;3)DC269_11_13
s/Y; Dp(1;3)DC269	81	11	14	s/Y; Dp(1;3)DC269_11	s/Y; Dp(1;3)DC269_11_14
s/Y; Dp(1;3)DC269	76	11	15	s/Y; Dp(1;3)DC269_11	s/Y; Dp(1;3)DC269_11_15
s/Y; Dp(1;3)DC269	76	11	16	s/Y; Dp(1;3)DC269_11	s/Y; Dp(1;3)DC269_11_16
s/Y; Dp(1;3)DC269	69	11	17	s/Y; Dp(1;3)DC269_11	s/Y; Dp(1;3)DC269_11_17
s/Y; Dp(1;3)DC269	67	11	18	s/Y; Dp(1;3)DC269_11	s/Y; Dp(1;3)DC269_11_18
s/Y; Dp(1;3)DC269	72	11	19	s/Y; Dp(1;3)DC269_11	s/Y; Dp(1;3)DC269_11_19
s/Y; Dp(1;3)DC269	70	11	20	s/Y; Dp(1;3)DC269_11	s/Y; Dp(1;3)DC269_11_20
s/Y; Dp(1;3)DC269	71	12	1	s/Y; Dp(1;3)DC269_12	s/Y; Dp(1;3)DC269_12_1
s/Y; Dp(1;3)DC269	73	12	2	s/Y; Dp(1;3)DC269_12	s/Y; Dp(1;3)DC269_12_2
s/Y; Dp(1;3)DC269	61	12	3	s/Y; Dp(1;3)DC269_12	s/Y; Dp(1;3)DC269_12_3
s/Y; Dp(1;3)DC269	59	12	4	s/Y; Dp(1;3)DC269_12	s/Y; Dp(1;3)DC269_12_4
s/Y; Dp(1;3)DC269	65	12	5	s/Y; Dp(1;3)DC269_12	s/Y; Dp(1;3)DC269_12_5
s/Y; Dp(1;3)DC269	72	12	6	s/Y; Dp(1;3)DC269_12	s/Y; Dp(1;3)DC269_12_6
s/Y; Dp(1;3)DC269	73	12	7	s/Y; Dp(1;3)DC269_12	s/Y; Dp(1;3)DC269_12_7
s/Y; Dp(1;3)DC269	81	12	8	s/Y; Dp(1;3)DC269_12	s/Y; Dp(1;3)DC269_12_8
s/Y; Dp(1;3)DC269	69	12	9	s/Y; Dp(1;3)DC269_12	s/Y; Dp(1;3)DC269_12_9
s/Y; Dp(1;3)DC269	74	12	10	s/Y; Dp(1;3)DC269_12	s/Y; Dp(1;3)DC269_12_10
s/Y; Dp(1;3)DC269	68	12	11	s/Y; Dp(1;3)DC269_12	s/Y; Dp(1;3)DC269_12_11
s/Y; Dp(1;3)DC269	62	12	12	s/Y; Dp(1;3)DC269_12	s/Y; Dp(1;3)DC269_12_12
s/Y; Dp(1;3)DC269	69	12	13	s/Y; Dp(1;3)DC269_12	s/Y; Dp(1;3)DC269_12_13
s/Y; Dp(1;3)DC269	63	12	14	s/Y; Dp(1;3)DC269_12	s/Y; Dp(1;3)DC269_12_14
s/Y; Dp(1;3)DC269	67	12	15	s/Y; Dp(1;3)DC269_12	s/Y; Dp(1;3)DC269_12_15
s/Y; Dp(1;3)DC269	67	12	16	s/Y; Dp(1;3)DC269_12	s/Y; Dp(1;3)DC269_12_16
s/Y; Dp(1;3)DC269	80	12	17	s/Y; Dp(1;3)DC269_12	s/Y; Dp(1;3)DC269_12_17
s/Y; Dp(1;3)DC269	64	12	18	s/Y; Dp(1;3)DC269_12	s/Y; Dp(1;3)DC269_12_18
s/Y; Dp(1;3)DC269	68	12	19	s/Y; Dp(1;3)DC269_12	s/Y; Dp(1;3)DC269_12_19
s/Y; Dp(1;3)DC269	71	12	20	s/Y; Dp(1;3)DC269_12	s/Y; Dp(1;3)DC269_12_20
s/Y; Dp(1;3)DC269	57	13	1	s/Y; Dp(1;3)DC269_13	s/Y; Dp(1;3)DC269_13_1
s/Y; Dp(1;3)DC269	48	13	2	s/Y; Dp(1;3)DC269_13	s/Y; Dp(1;3)DC269_13_2
s/Y; Dp(1;3)DC269	76	13	3	s/Y; Dp(1;3)DC269_13	s/Y; Dp(1;3)DC269_13_3
s/Y; Dp(1;3)DC269	49	13	4	s/Y; Dp(1;3)DC269_13	s/Y; Dp(1;3)DC269_13_4
s/Y; Dp(1;3)DC269	67	13	5	s/Y; Dp(1;3)DC269_13	s/Y; Dp(1;3)DC269_13_5
s/Y; Dp(1;3)DC269	62	13	6	s/Y; Dp(1;3)DC269_13	s/Y; Dp(1;3)DC269_13_6
s/Y; Dp(1;3)DC269	77	13	7	s/Y; Dp(1;3)DC269_13	s/Y; Dp(1;3)DC269_13_7
s/Y; Dp(1;3)DC269	63	13	8	s/Y; Dp(1;3)DC269_13	s/Y; Dp(1;3)DC269_13_8
s/Y; Dp(1;3)DC269	86	13	9	s/Y; Dp(1;3)DC269_13	s/Y; Dp(1;3)DC269_13_9
s/Y; Dp(1;3)DC269	56	13	10	s/Y; Dp(1;3)DC269_13	s/Y; Dp(1;3)DC269_13_10
s/Y; Dp(1;3)DC269	77	13	11	s/Y; Dp(1;3)DC269_13	s/Y; Dp(1;3)DC269_13_11
s/Y; Dp(1;3)DC269	79	13	12	s/Y; Dp(1;3)DC269_13	s/Y; Dp(1;3)DC269_13_12
s/Y; Dp(1;3)DC269	73	13	13	s/Y; Dp(1;3)DC269_13	s/Y; Dp(1;3)DC269_13_13
s/Y; Dp(1;3)DC269	74	13	14	s/Y; Dp(1;3)DC269_13	s/Y; Dp(1;3)DC269_13_14
s/Y; Dp(1;3)DC269	65	13	15	s/Y; Dp(1;3)DC269_13	s/Y; Dp(1;3)DC269_13_15
s/Y; Dp(1;3)DC269	64	13	16	s/Y; Dp(1;3)DC269_13	s/Y; Dp(1;3)DC269_13_16
s/Y; Dp(1;3)DC269	70	13	17	s/Y; Dp(1;3)DC269_13	s/Y; Dp(1;3)DC269_13_17
s/Y; Dp(1;3)DC269	65	13	18	s/Y; Dp(1;3)DC269_13	s/Y; Dp(1;3)DC269_13_18
s/Y; Dp(1;3)DC269	52	13	19	s/Y; Dp(1;3)DC269_13	s/Y; Dp(1;3)DC269_13_19
s/Y; Dp(1;3)DC269	73	13	20	s/Y; Dp(1;3)DC269_13	s/Y; Dp(1;3)DC269_13_20
s/Y; Dp(1;3)DC269	88	14	1	s/Y; Dp(1;3)DC269_14	s/Y; Dp(1;3)DC269_14_1
s/Y; Dp(1;3)DC269	70	14	2	s/Y; Dp(1;3)DC269_14	s/Y; Dp(1;3)DC269_14_2
s/Y; Dp(1;3)DC269	64	14	3	s/Y; Dp(1;3)DC269_14	s/Y; Dp(1;3)DC269_14_3
s/Y; Dp(1;3)DC269	70	14	4	s/Y; Dp(1;3)DC269_14	s/Y; Dp(1;3)DC269_14_4
s/Y; Dp(1;3)DC269	76	14	5	s/Y; Dp(1;3)DC269_14	s/Y; Dp(1;3)DC269_14_5
s/Y; Dp(1;3)DC269	79	14	6	s/Y; Dp(1;3)DC269_14	s/Y; Dp(1;3)DC269_14_6
s/Y; Dp(1;3)DC269	73	14	7	s/Y; Dp(1;3)DC269_14	s/Y; Dp(1;3)DC269_14_7
s/Y; Dp(1;3)DC269	79	14	8	s/Y; Dp(1;3)DC269_14	s/Y; Dp(1;3)DC269_14_8
s/Y; Dp(1;3)DC269	73	14	9	s/Y; Dp(1;3)DC269_14	s/Y; Dp(1;3)DC269_14_9
s/Y; Dp(1;3)DC269	75	14	10	s/Y; Dp(1;3)DC269_14	s/Y; Dp(1;3)DC269_14_10
s/Y; Dp(1;3)DC269	93	14	11	s/Y; Dp(1;3)DC269_14	s/Y; Dp(1;3)DC269_14_11
s/Y; Dp(1;3)DC269	80	14	12	s/Y; Dp(1;3)DC269_14	s/Y; Dp(1;3)DC269_14_12
s/Y; Dp(1;3)DC269	77	14	13	s/Y; Dp(1;3)DC269_14	s/Y; Dp(1;3)DC269_14_13
s/Y; Dp(1;3)DC269	69	14	14	s/Y; Dp(1;3)DC269_14	s/Y; Dp(1;3)DC269_14_14
s/Y; Dp(1;3)DC269	72	14	15	s/Y; Dp(1;3)DC269_14	s/Y; Dp(1;3)DC269_14_15
s/Y; Dp(1;3)DC269	76	14	16	s/Y; Dp(1;3)DC269_14	s/Y; Dp(1;3)DC269_14_16
s/Y; Dp(1;3)DC269	74	14	17	s/Y; Dp(1;3)DC269_14	s/Y; Dp(1;3)DC269_14_17
s/Y; Dp(1;3)DC269	74	14	18	s/Y; Dp(1;3)DC269_14	s/Y; Dp(1;3)DC269_14_18
s/Y; Dp(1;3)DC269	66	14	19	s/Y; Dp(1;3)DC269_14	s/Y; Dp(1;3)DC269_14_19
s/Y; Dp(1;3)DC269	56	14	20	s/Y; Dp(1;3)DC269_14	s/Y; Dp(1;3)DC269_14_20
s/Y; Dp(1;3)DC269	68	15	1	s/Y; Dp(1;3)DC269_15	s/Y; Dp(1;3)DC269_15_1
s/Y; Dp(1;3)DC269	68	15	2	s/Y; Dp(1;3)DC269_15	s/Y; Dp(1;3)DC269_15_2
s/Y; Dp(1;3)DC269	69	15	3	s/Y; Dp(1;3)DC269_15	s/Y; Dp(1;3)DC269_15_3
s/Y; Dp(1;3)DC269	74	15	4	s/Y; Dp(1;3)DC269_15	s/Y; Dp(1;3)DC269_15_4
s/Y; Dp(1;3)DC269	68	15	5	s/Y; Dp(1;3)DC269_15	s/Y; Dp(1;3)DC269_15_5
s/Y; Dp(1;3)DC269	82	15	6	s/Y; Dp(1;3)DC269_15	s/Y; Dp(1;3)DC269_15_6
s/Y; Dp(1;3)DC269	74	15	7	s/Y; Dp(1;3)DC269_15	s/Y; Dp(1;3)DC269_15_7
s/Y; Dp(1;3)DC269	61	15	8	s/Y; Dp(1;3)DC269_15	s/Y; Dp(1;3)DC269_15_8
s/Y; Dp(1;3)DC269	74	15	9	s/Y; Dp(1;3)DC269_15	s/Y; Dp(1;3)DC269_15_9
s/Y; Dp(1;3)DC269	67	15	10	s/Y; Dp(1;3)DC269_15	s/Y; Dp(1;3)DC269_15_10
s/Y; Dp(1;3)DC269	57	15	11	s/Y; Dp(1;3)DC269_15	s/Y; Dp(1;3)DC269_15_11
s/Y; Dp(1;3)DC269	64	15	12	s/Y; Dp(1;3)DC269_15	s/Y; Dp(1;3)DC269_15_12
s/Y; Dp(1;3)DC269	79	15	13	s/Y; Dp(1;3)DC269_15	s/Y; Dp(1;3)DC269_15_13
s/Y; Dp(1;3)DC269	58	15	14	s/Y; Dp(1;3)DC269_15	s/Y; Dp(1;3)DC269_15_14
s/Y; Dp(1;3)DC269	69	15	15	s/Y; Dp(1;3)DC269_15	s/Y; Dp(1;3)DC269_15_15
s/Y; Dp(1;3)DC269	71	15	16	s/Y; Dp(1;3)DC269_15	s/Y; Dp(1;3)DC269_15_16
s/Y; Dp(1;3)DC269	69	15	17	s/Y; Dp(1;3)DC269_15	s/Y; Dp(1;3)DC269_15_17
s/Y; Dp(1;3)DC269	67	15	18	s/Y; Dp(1;3)DC269_15	s/Y; Dp(1;3)DC269_15_18
s/Y; Dp(1;3)DC269	68	15	19	s/Y; Dp(1;3)DC269_15	s/Y; Dp(1;3)DC269_15_19
s/Y; Dp(1;3)DC269	75	15	20	s/Y; Dp(1;3)DC269_15	s/Y; Dp(1;3)DC269_15_20

## Sheet: Expt 4-Figure 3K data
Genotype	Gray value	fly	pixel	flyid	pixelid
UAS-YippeeRNAi	76	1	1	UAS-YippeeRNAi_1	UAS-YippeeRNAi_1_1
UAS-YippeeRNAi	83	1	2	UAS-YippeeRNAi_1	UAS-YippeeRNAi_1_2
UAS-YippeeRNAi	83	1	3	UAS-YippeeRNAi_1	UAS-YippeeRNAi_1_3
UAS-YippeeRNAi	79	1	4	UAS-YippeeRNAi_1	UAS-YippeeRNAi_1_4
UAS-YippeeRNAi	90	1	5	UAS-YippeeRNAi_1	UAS-YippeeRNAi_1_5
UAS-YippeeRNAi	79	1	6	UAS-YippeeRNAi_1	UAS-YippeeRNAi_1_6
UAS-YippeeRNAi	73	1	7	UAS-YippeeRNAi_1	UAS-YippeeRNAi_1_7
UAS-YippeeRNAi	73	1	8	UAS-YippeeRNAi_1	UAS-YippeeRNAi_1_8
UAS-YippeeRNAi	70	1	9	UAS-YippeeRNAi_1	UAS-YippeeRNAi_1_9
UAS-YippeeRNAi	84	1	10	UAS-YippeeRNAi_1	UAS-YippeeRNAi_1_10
UAS-YippeeRNAi	82	1	11	UAS-YippeeRNAi_1	UAS-YippeeRNAi_1_11
UAS-YippeeRNAi	72	1	12	UAS-YippeeRNAi_1	UAS-YippeeRNAi_1_12
UAS-YippeeRNAi	79	1	13	UAS-YippeeRNAi_1	UAS-YippeeRNAi_1_13
UAS-YippeeRNAi	77	1	14	UAS-YippeeRNAi_1	UAS-YippeeRNAi_1_14
UAS-YippeeRNAi	70	1	15	UAS-YippeeRNAi_1	UAS-YippeeRNAi_1_15
UAS-YippeeRNAi	85	1	16	UAS-YippeeRNAi_1	UAS-YippeeRNAi_1_16
UAS-YippeeRNAi	87	1	17	UAS-YippeeRNAi_1	UAS-YippeeRNAi_1_17
UAS-YippeeRNAi	76	1	18	UAS-YippeeRNAi_1	UAS-YippeeRNAi_1_18
UAS-YippeeRNAi	89	1	19	UAS-YippeeRNAi_1	UAS-YippeeRNAi_1_19
UAS-YippeeRNAi	81	1	20	UAS-YippeeRNAi_1	UAS-YippeeRNAi_1_20
UAS-YippeeRNAi	77	2	1	UAS-YippeeRNAi_2	UAS-YippeeRNAi_2_1
UAS-YippeeRNAi	76	2	2	UAS-YippeeRNAi_2	UAS-YippeeRNAi_2_2
UAS-YippeeRNAi	78	2	3	UAS-YippeeRNAi_2	UAS-YippeeRNAi_2_3
UAS-YippeeRNAi	85	2	4	UAS-YippeeRNAi_2	UAS-YippeeRNAi_2_4
UAS-YippeeRNAi	88	2	5	UAS-YippeeRNAi_2	UAS-YippeeRNAi_2_5
UAS-YippeeRNAi	84	2	6	UAS-YippeeRNAi_2	UAS-YippeeRNAi_2_6
UAS-YippeeRNAi	94	2	7	UAS-YippeeRNAi_2	UAS-YippeeRNAi_2_7
UAS-YippeeRNAi	93	2	8	UAS-YippeeRNAi_2	UAS-YippeeRNAi_2_8
UAS-YippeeRNAi	85	2	9	UAS-YippeeRNAi_2	UAS-YippeeRNAi_2_9
UAS-YippeeRNAi	86	2	10	UAS-YippeeRNAi_2	UAS-YippeeRNAi_2_10
UAS-YippeeRNAi	81	2	11	UAS-YippeeRNAi_2	UAS-YippeeRNAi_2_11
UAS-YippeeRNAi	80	2	12	UAS-YippeeRNAi_2	UAS-YippeeRNAi_2_12
UAS-YippeeRNAi	87	2	13	UAS-YippeeRNAi_2	UAS-YippeeRNAi_2_13
UAS-YippeeRNAi	74	2	14	UAS-YippeeRNAi_2	UAS-YippeeRNAi_2_14
UAS-YippeeRNAi	64	2	15	UAS-YippeeRNAi_2	UAS-YippeeRNAi_2_15
UAS-YippeeRNAi	74	2	16	UAS-YippeeRNAi_2	UAS-YippeeRNAi_2_16
UAS-YippeeRNAi	85	2	17	UAS-YippeeRNAi_2	UAS-YippeeRNAi_2_17
UAS-YippeeRNAi	82	2	18	UAS-YippeeRNAi_2	UAS-YippeeRNAi_2_18
UAS-YippeeRNAi	82	2	19	UAS-YippeeRNAi_2	UAS-YippeeRNAi_2_19
UAS-YippeeRNAi	84	2	20	UAS-YippeeRNAi_2	UAS-YippeeRNAi_2_20
UAS-YippeeRNAi	78	3	1	UAS-YippeeRNAi_3	UAS-YippeeRNAi_3_1
UAS-YippeeRNAi	90	3	2	UAS-YippeeRNAi_3	UAS-YippeeRNAi_3_2
UAS-YippeeRNAi	84	3	3	UAS-YippeeRNAi_3	UAS-YippeeRNAi_3_3
UAS-YippeeRNAi	89	3	4	UAS-YippeeRNAi_3	UAS-YippeeRNAi_3_4
UAS-YippeeRNAi	96	3	5	UAS-YippeeRNAi_3	UAS-YippeeRNAi_3_5
UAS-YippeeRNAi	81	3	6	UAS-YippeeRNAi_3	UAS-YippeeRNAi_3_6
UAS-YippeeRNAi	87	3	7	UAS-YippeeRNAi_3	UAS-YippeeRNAi_3_7
UAS-YippeeRNAi	93	3	8	UAS-YippeeRNAi_3	UAS-YippeeRNAi_3_8
UAS-YippeeRNAi	83	3	9	UAS-YippeeRNAi_3	UAS-YippeeRNAi_3_9
UAS-YippeeRNAi	82	3	10	UAS-YippeeRNAi_3	UAS-YippeeRNAi_3_10
UAS-YippeeRNAi	81	3	11	UAS-YippeeRNAi_3	UAS-YippeeRNAi_3_11
UAS-YippeeRNAi	85	3	12	UAS-YippeeRNAi_3	UAS-YippeeRNAi_3_12
UAS-YippeeRNAi	89	3	13	UAS-YippeeRNAi_3	UAS-YippeeRNAi_3_13
UAS-YippeeRNAi	82	3	14	UAS-YippeeRNAi_3	UAS-YippeeRNAi_3_14
UAS-YippeeRNAi	82	3	15	UAS-YippeeRNAi_3	UAS-YippeeRNAi_3_15
UAS-YippeeRNAi	77	3	16	UAS-YippeeRNAi_3	UAS-YippeeRNAi_3_16
UAS-YippeeRNAi	87	3	17	UAS-YippeeRNAi_3	UAS-YippeeRNAi_3_17
UAS-YippeeRNAi	78	3	18	UAS-YippeeRNAi_3	UAS-YippeeRNAi_3_18
UAS-YippeeRNAi	84	3	19	UAS-YippeeRNAi_3	UAS-YippeeRNAi_3_19
UAS-YippeeRNAi	69	3	20	UAS-YippeeRNAi_3	UAS-YippeeRNAi_3_20
UAS-YippeeRNAi	68	4	1	UAS-YippeeRNAi_4	UAS-YippeeRNAi_4_1
UAS-YippeeRNAi	66	4	2	UAS-YippeeRNAi_4	UAS-YippeeRNAi_4_2
UAS-YippeeRNAi	71	4	3	UAS-YippeeRNAi_4	UAS-YippeeRNAi_4_3
UAS-YippeeRNAi	72	4	4	UAS-YippeeRNAi_4	UAS-YippeeRNAi_4_4
UAS-YippeeRNAi	72	4	5	UAS-YippeeRNAi_4	UAS-YippeeRNAi_4_5
UAS-YippeeRNAi	82	4	6	UAS-YippeeRNAi_4	UAS-YippeeRNAi_4_6
UAS-YippeeRNAi	81	4	7	UAS-YippeeRNAi_4	UAS-YippeeRNAi_4_7
UAS-YippeeRNAi	76	4	8	UAS-YippeeRNAi_4	UAS-YippeeRNAi_4_8
UAS-YippeeRNAi	74	4	9	UAS-YippeeRNAi_4	UAS-YippeeRNAi_4_9
UAS-YippeeRNAi	45	4	10	UAS-YippeeRNAi_4	UAS-YippeeRNAi_4_10
UAS-YippeeRNAi	63	4	11	UAS-YippeeRNAi_4	UAS-YippeeRNAi_4_11
UAS-YippeeRNAi	72	4	12	UAS-YippeeRNAi_4	UAS-YippeeRNAi_4_12
UAS-YippeeRNAi	69	4	13	UAS-YippeeRNAi_4	UAS-YippeeRNAi_4_13
UAS-YippeeRNAi	79	4	14	UAS-YippeeRNAi_4	UAS-YippeeRNAi_4_14
UAS-YippeeRNAi	87	4	15	UAS-YippeeRNAi_4	UAS-YippeeRNAi_4_15
UAS-YippeeRNAi	71	4	16	UAS-YippeeRNAi_4	UAS-YippeeRNAi_4_16
UAS-YippeeRNAi	69	4	17	UAS-YippeeRNAi_4	UAS-YippeeRNAi_4_17
UAS-YippeeRNAi	72	4	18	UAS-YippeeRNAi_4	UAS-YippeeRNAi_4_18
UAS-YippeeRNAi	74	4	19	UAS-YippeeRNAi_4	UAS-YippeeRNAi_4_19
UAS-YippeeRNAi	87	4	20	UAS-YippeeRNAi_4	UAS-YippeeRNAi_4_20
UAS-YippeeRNAi	31	5	1	UAS-YippeeRNAi_5	UAS-YippeeRNAi_5_1
UAS-YippeeRNAi	52	5	2	UAS-YippeeRNAi_5	UAS-YippeeRNAi_5_2
UAS-YippeeRNAi	57	5	3	UAS-YippeeRNAi_5	UAS-YippeeRNAi_5_3
UAS-YippeeRNAi	60	5	4	UAS-YippeeRNAi_5	UAS-YippeeRNAi_5_4
UAS-YippeeRNAi	74	5	5	UAS-YippeeRNAi_5	UAS-YippeeRNAi_5_5
UAS-YippeeRNAi	76	5	6	UAS-YippeeRNAi_5	UAS-YippeeRNAi_5_6
UAS-YippeeRNAi	66	5	7	UAS-YippeeRNAi_5	UAS-YippeeRNAi_5_7
UAS-YippeeRNAi	69	5	8	UAS-YippeeRNAi_5	UAS-YippeeRNAi_5_8
UAS-YippeeRNAi	52	5	9	UAS-YippeeRNAi_5	UAS-YippeeRNAi_5_9
UAS-YippeeRNAi	63	5	10	UAS-YippeeRNAi_5	UAS-YippeeRNAi_5_10
UAS-YippeeRNAi	54	5	11	UAS-YippeeRNAi_5	UAS-YippeeRNAi_5_11
UAS-YippeeRNAi	45	5	12	UAS-YippeeRNAi_5	UAS-YippeeRNAi_5_12
UAS-YippeeRNAi	65	5	13	UAS-YippeeRNAi_5	UAS-YippeeRNAi_5_13
UAS-YippeeRNAi	69	5	14	UAS-YippeeRNAi_5	UAS-YippeeRNAi_5_14
UAS-YippeeRNAi	63	5	15	UAS-YippeeRNAi_5	UAS-YippeeRNAi_5_15
UAS-YippeeRNAi	62	5	16	UAS-YippeeRNAi_5	UAS-YippeeRNAi_5_16
UAS-YippeeRNAi	69	5	17	UAS-YippeeRNAi_5	UAS-YippeeRNAi_5_17
UAS-YippeeRNAi	72	5	18	UAS-YippeeRNAi_5	UAS-YippeeRNAi_5_18
UAS-YippeeRNAi	69	5	19	UAS-YippeeRNAi_5	UAS-YippeeRNAi_5_19
UAS-YippeeRNAi	71	5	20	UAS-YippeeRNAi_5	UAS-YippeeRNAi_5_20
UAS-YippeeRNAi	81	6	1	UAS-YippeeRNAi_6	UAS-YippeeRNAi_6_1
UAS-YippeeRNAi	66	6	2	UAS-YippeeRNAi_6	UAS-YippeeRNAi_6_2
UAS-YippeeRNAi	80	6	3	UAS-YippeeRNAi_6	UAS-YippeeRNAi_6_3
UAS-YippeeRNAi	72	6	4	UAS-YippeeRNAi_6	UAS-YippeeRNAi_6_4
UAS-YippeeRNAi	73	6	5	UAS-YippeeRNAi_6	UAS-YippeeRNAi_6_5
UAS-YippeeRNAi	66	6	6	UAS-YippeeRNAi_6	UAS-YippeeRNAi_6_6
UAS-YippeeRNAi	80	6	7	UAS-YippeeRNAi_6	UAS-YippeeRNAi_6_7
UAS-YippeeRNAi	85	6	8	UAS-YippeeRNAi_6	UAS-YippeeRNAi_6_8
UAS-YippeeRNAi	79	6	9	UAS-YippeeRNAi_6	UAS-YippeeRNAi_6_9
UAS-YippeeRNAi	69	6	10	UAS-YippeeRNAi_6	UAS-YippeeRNAi_6_10
UAS-YippeeRNAi	73	6	11	UAS-YippeeRNAi_6	UAS-YippeeRNAi_6_11
UAS-YippeeRNAi	73	6	12	UAS-YippeeRNAi_6	UAS-YippeeRNAi_6_12
UAS-YippeeRNAi	78	6	13	UAS-YippeeRNAi_6	UAS-YippeeRNAi_6_13
UAS-YippeeRNAi	76	6	14	UAS-YippeeRNAi_6	UAS-YippeeRNAi_6_14
UAS-YippeeRNAi	67	6	15	UAS-YippeeRNAi_6	UAS-YippeeRNAi_6_15
UAS-YippeeRNAi	69	6	16	UAS-YippeeRNAi_6	UAS-YippeeRNAi_6_16
UAS-YippeeRNAi	73	6	17	UAS-YippeeRNAi_6	UAS-YippeeRNAi_6_17
UAS-YippeeRNAi	69	6	18	UAS-YippeeRNAi_6	UAS-YippeeRNAi_6_18
UAS-YippeeRNAi	74	6	19	UAS-YippeeRNAi_6	UAS-YippeeRNAi_6_19
UAS-YippeeRNAi	73	6	20	UAS-YippeeRNAi_6	UAS-YippeeRNAi_6_20
UAS-YippeeRNAi	62	7	1	UAS-YippeeRNAi_7	UAS-YippeeRNAi_7_1
UAS-YippeeRNAi	60	7	2	UAS-YippeeRNAi_7	UAS-YippeeRNAi_7_2
UAS-YippeeRNAi	70	7	3	UAS-YippeeRNAi_7	UAS-YippeeRNAi_7_3
UAS-YippeeRNAi	68	7	4	UAS-YippeeRNAi_7	UAS-YippeeRNAi_7_4
UAS-YippeeRNAi	74	7	5	UAS-YippeeRNAi_7	UAS-YippeeRNAi_7_5
UAS-YippeeRNAi	83	7	6	UAS-YippeeRNAi_7	UAS-YippeeRNAi_7_6
UAS-YippeeRNAi	56	7	7	UAS-YippeeRNAi_7	UAS-YippeeRNAi_7_7
UAS-YippeeRNAi	61	7	8	UAS-YippeeRNAi_7	UAS-YippeeRNAi_7_8
UAS-YippeeRNAi	55	7	9	UAS-YippeeRNAi_7	UAS-YippeeRNAi_7_9
UAS-YippeeRNAi	61	7	10	UAS-YippeeRNAi_7	UAS-YippeeRNAi_7_10
UAS-YippeeRNAi	75	7	11	UAS-YippeeRNAi_7	UAS-YippeeRNAi_7_11
UAS-YippeeRNAi	65	7	12	UAS-YippeeRNAi_7	UAS-YippeeRNAi_7_12
UAS-YippeeRNAi	76	7	13	UAS-YippeeRNAi_7	UAS-YippeeRNAi_7_13
UAS-YippeeRNAi	70	7	14	UAS-YippeeRNAi_7	UAS-YippeeRNAi_7_14
UAS-YippeeRNAi	58	7	15	UAS-YippeeRNAi_7	UAS-YippeeRNAi_7_15
UAS-YippeeRNAi	64	7	16	UAS-YippeeRNAi_7	UAS-YippeeRNAi_7_16
UAS-YippeeRNAi	74	7	17	UAS-YippeeRNAi_7	UAS-YippeeRNAi_7_17
UAS-YippeeRNAi	63	7	18	UAS-YippeeRNAi_7	UAS-YippeeRNAi_7_18
UAS-YippeeRNAi	54	7	19	UAS-YippeeRNAi_7	UAS-YippeeRNAi_7_19
UAS-YippeeRNAi	67	7	20	UAS-YippeeRNAi_7	UAS-YippeeRNAi_7_20
UAS-YippeeRNAi	90	8	1	UAS-YippeeRNAi_8	UAS-YippeeRNAi_8_1
UAS-YippeeRNAi	94	8	2	UAS-YippeeRNAi_8	UAS-YippeeRNAi_8_2
UAS-YippeeRNAi	83	8	3	UAS-YippeeRNAi_8	UAS-YippeeRNAi_8_3
UAS-YippeeRNAi	75	8	4	UAS-YippeeRNAi_8	UAS-YippeeRNAi_8_4
UAS-YippeeRNAi	72	8	5	UAS-YippeeRNAi_8	UAS-YippeeRNAi_8_5
UAS-YippeeRNAi	72	8	6	UAS-YippeeRNAi_8	UAS-YippeeRNAi_8_6
UAS-YippeeRNAi	67	8	7	UAS-YippeeRNAi_8	UAS-YippeeRNAi_8_7
UAS-YippeeRNAi	74	8	8	UAS-YippeeRNAi_8	UAS-YippeeRNAi_8_8
UAS-YippeeRNAi	66	8	9	UAS-YippeeRNAi_8	UAS-YippeeRNAi_8_9
UAS-YippeeRNAi	71	8	10	UAS-YippeeRNAi_8	UAS-YippeeRNAi_8_10
UAS-YippeeRNAi	60	8	11	UAS-YippeeRNAi_8	UAS-YippeeRNAi_8_11
UAS-YippeeRNAi	71	8	12	UAS-YippeeRNAi_8	UAS-YippeeRNAi_8_12
UAS-YippeeRNAi	48	8	13	UAS-YippeeRNAi_8	UAS-YippeeRNAi_8_13
UAS-YippeeRNAi	64	8	14	UAS-YippeeRNAi_8	UAS-YippeeRNAi_8_14
UAS-YippeeRNAi	60	8	15	UAS-YippeeRNAi_8	UAS-YippeeRNAi_8_15
UAS-YippeeRNAi	71	8	16	UAS-YippeeRNAi_8	UAS-YippeeRNAi_8_16
UAS-YippeeRNAi	71	8	17	UAS-YippeeRNAi_8	UAS-YippeeRNAi_8_17
UAS-YippeeRNAi	62	8	18	UAS-YippeeRNAi_8	UAS-YippeeRNAi_8_18
UAS-YippeeRNAi	73	8	19	UAS-YippeeRNAi_8	UAS-YippeeRNAi_8_19
UAS-YippeeRNAi	93	8	20	UAS-YippeeRNAi_8	UAS-YippeeRNAi_8_20
UAS-YippeeRNAi	54	9	1	UAS-YippeeRNAi_9	UAS-YippeeRNAi_9_1
UAS-YippeeRNAi	69	9	2	UAS-YippeeRNAi_9	UAS-YippeeRNAi_9_2
UAS-YippeeRNAi	64	9	3	UAS-YippeeRNAi_9	UAS-YippeeRNAi_9_3
UAS-YippeeRNAi	78	9	4	UAS-YippeeRNAi_9	UAS-YippeeRNAi_9_4
UAS-YippeeRNAi	93	9	5	UAS-YippeeRNAi_9	UAS-YippeeRNAi_9_5
UAS-YippeeRNAi	83	9	6	UAS-YippeeRNAi_9	UAS-YippeeRNAi_9_6
UAS-YippeeRNAi	44	9	7	UAS-YippeeRNAi_9	UAS-YippeeRNAi_9_7
UAS-YippeeRNAi	82	9	8	UAS-YippeeRNAi_9	UAS-YippeeRNAi_9_8
UAS-YippeeRNAi	68	9	9	UAS-YippeeRNAi_9	UAS-YippeeRNAi_9_9
UAS-YippeeRNAi	62	9	10	UAS-YippeeRNAi_9	UAS-YippeeRNAi_9_10
UAS-YippeeRNAi	64	9	11	UAS-YippeeRNAi_9	UAS-YippeeRNAi_9_11
UAS-YippeeRNAi	68	9	12	UAS-YippeeRNAi_9	UAS-YippeeRNAi_9_12
UAS-YippeeRNAi	71	9	13	UAS-YippeeRNAi_9	UAS-YippeeRNAi_9_13
UAS-YippeeRNAi	73	9	14	UAS-YippeeRNAi_9	UAS-YippeeRNAi_9_14
UAS-YippeeRNAi	88	9	15	UAS-YippeeRNAi_9	UAS-YippeeRNAi_9_15
UAS-YippeeRNAi	83	9	16	UAS-YippeeRNAi_9	UAS-YippeeRNAi_9_16
UAS-YippeeRNAi	68	9	17	UAS-YippeeRNAi_9	UAS-YippeeRNAi_9_17
UAS-YippeeRNAi	65	9	18	UAS-YippeeRNAi_9	UAS-YippeeRNAi_9_18
UAS-YippeeRNAi	81	9	19	UAS-YippeeRNAi_9	UAS-YippeeRNAi_9_19
UAS-YippeeRNAi	68	9	20	UAS-YippeeRNAi_9	UAS-YippeeRNAi_9_20
UAS-YippeeRNAi	67	10	1	UAS-YippeeRNAi_10	UAS-YippeeRNAi_10_1
UAS-YippeeRNAi	75	10	2	UAS-YippeeRNAi_10	UAS-YippeeRNAi_10_2
UAS-YippeeRNAi	81	10	3	UAS-YippeeRNAi_10	UAS-YippeeRNAi_10_3
UAS-YippeeRNAi	83	10	4	UAS-YippeeRNAi_10	UAS-YippeeRNAi_10_4
UAS-YippeeRNAi	84	10	5	UAS-YippeeRNAi_10	UAS-YippeeRNAi_10_5
UAS-YippeeRNAi	91	10	6	UAS-YippeeRNAi_10	UAS-YippeeRNAi_10_6
UAS-YippeeRNAi	82	10	7	UAS-YippeeRNAi_10	UAS-YippeeRNAi_10_7
UAS-YippeeRNAi	70	10	8	UAS-YippeeRNAi_10	UAS-YippeeRNAi_10_8
UAS-YippeeRNAi	86	10	9	UAS-YippeeRNAi_10	UAS-YippeeRNAi_10_9
UAS-YippeeRNAi	81	10	10	UAS-YippeeRNAi_10	UAS-YippeeRNAi_10_10
UAS-YippeeRNAi	65	10	11	UAS-YippeeRNAi_10	UAS-YippeeRNAi_10_11
UAS-YippeeRNAi	63	10	12	UAS-YippeeRNAi_10	UAS-YippeeRNAi_10_12
UAS-YippeeRNAi	72	10	13	UAS-YippeeRNAi_10	UAS-YippeeRNAi_10_13
UAS-YippeeRNAi	77	10	14	UAS-YippeeRNAi_10	UAS-YippeeRNAi_10_14
UAS-YippeeRNAi	85	10	15	UAS-YippeeRNAi_10	UAS-YippeeRNAi_10_15
UAS-YippeeRNAi	84	10	16	UAS-YippeeRNAi_10	UAS-YippeeRNAi_10_16
UAS-YippeeRNAi	81	10	17	UAS-YippeeRNAi_10	UAS-YippeeRNAi_10_17
UAS-YippeeRNAi	73	10	18	UAS-YippeeRNAi_10	UAS-YippeeRNAi_10_18
UAS-YippeeRNAi	79	10	19	UAS-YippeeRNAi_10	UAS-YippeeRNAi_10_19
UAS-YippeeRNAi	79	10	20	UAS-YippeeRNAi_10	UAS-YippeeRNAi_10_20
UAS-YippeeRNAi	76	11	1	UAS-YippeeRNAi_11	UAS-YippeeRNAi_11_1
UAS-YippeeRNAi	69	11	2	UAS-YippeeRNAi_11	UAS-YippeeRNAi_11_2
UAS-YippeeRNAi	72	11	3	UAS-YippeeRNAi_11	UAS-YippeeRNAi_11_3
UAS-YippeeRNAi	81	11	4	UAS-YippeeRNAi_11	UAS-YippeeRNAi_11_4
UAS-YippeeRNAi	73	11	5	UAS-YippeeRNAi_11	UAS-YippeeRNAi_11_5
UAS-YippeeRNAi	70	11	6	UAS-YippeeRNAi_11	UAS-YippeeRNAi_11_6
UAS-YippeeRNAi	85	11	7	UAS-YippeeRNAi_11	UAS-YippeeRNAi_11_7
UAS-YippeeRNAi	78	11	8	UAS-YippeeRNAi_11	UAS-YippeeRNAi_11_8
UAS-YippeeRNAi	75	11	9	UAS-YippeeRNAi_11	UAS-YippeeRNAi_11_9
UAS-YippeeRNAi	84	11	10	UAS-YippeeRNAi_11	UAS-YippeeRNAi_11_10
UAS-YippeeRNAi	80	11	11	UAS-YippeeRNAi_11	UAS-YippeeRNAi_11_11
UAS-YippeeRNAi	69	11	12	UAS-YippeeRNAi_11	UAS-YippeeRNAi_11_12
UAS-YippeeRNAi	74	11	13	UAS-YippeeRNAi_11	UAS-YippeeRNAi_11_13
UAS-YippeeRNAi	85	11	14	UAS-YippeeRNAi_11	UAS-YippeeRNAi_11_14
UAS-YippeeRNAi	90	11	15	UAS-YippeeRNAi_11	UAS-YippeeRNAi_11_15
UAS-YippeeRNAi	88	11	16	UAS-YippeeRNAi_11	UAS-YippeeRNAi_11_16
UAS-YippeeRNAi	84	11	17	UAS-YippeeRNAi_11	UAS-YippeeRNAi_11_17
UAS-YippeeRNAi	86	11	18	UAS-YippeeRNAi_11	UAS-YippeeRNAi_11_18
UAS-YippeeRNAi	76	11	19	UAS-YippeeRNAi_11	UAS-YippeeRNAi_11_19
UAS-YippeeRNAi	77	11	20	UAS-YippeeRNAi_11	UAS-YippeeRNAi_11_20
UAS-YippeeRNAi	64	12	1	UAS-YippeeRNAi_12	UAS-YippeeRNAi_12_1
UAS-YippeeRNAi	66	12	2	UAS-YippeeRNAi_12	UAS-YippeeRNAi_12_2
UAS-YippeeRNAi	73	12	3	UAS-YippeeRNAi_12	UAS-YippeeRNAi_12_3
UAS-YippeeRNAi	72	12	4	UAS-YippeeRNAi_12	UAS-YippeeRNAi_12_4
UAS-YippeeRNAi	88	12	5	UAS-YippeeRNAi_12	UAS-YippeeRNAi_12_5
UAS-YippeeRNAi	90	12	6	UAS-YippeeRNAi_12	UAS-YippeeRNAi_12_6
UAS-YippeeRNAi	67	12	7	UAS-YippeeRNAi_12	UAS-YippeeRNAi_12_7
UAS-YippeeRNAi	63	12	8	UAS-YippeeRNAi_12	UAS-YippeeRNAi_12_8
UAS-YippeeRNAi	66	12	9	UAS-YippeeRNAi_12	UAS-YippeeRNAi_12_9
UAS-YippeeRNAi	59	12	10	UAS-YippeeRNAi_12	UAS-YippeeRNAi_12_10
UAS-YippeeRNAi	75	12	11	UAS-YippeeRNAi_12	UAS-YippeeRNAi_12_11
UAS-YippeeRNAi	69	12	12	UAS-YippeeRNAi_12	UAS-YippeeRNAi_12_12
UAS-YippeeRNAi	68	12	13	UAS-YippeeRNAi_12	UAS-YippeeRNAi_12_13
UAS-YippeeRNAi	65	12	14	UAS-YippeeRNAi_12	UAS-YippeeRNAi_12_14
UAS-YippeeRNAi	74	12	15	UAS-YippeeRNAi_12	UAS-YippeeRNAi_12_15
UAS-YippeeRNAi	64	12	16	UAS-YippeeRNAi_12	UAS-YippeeRNAi_12_16
UAS-YippeeRNAi	56	12	17	UAS-YippeeRNAi_12	UAS-YippeeRNAi_12_17
UAS-YippeeRNAi	67	12	18	UAS-YippeeRNAi_12	UAS-YippeeRNAi_12_18
UAS-YippeeRNAi	74	12	19	UAS-YippeeRNAi_12	UAS-YippeeRNAi_12_19
UAS-YippeeRNAi	77	12	20	UAS-YippeeRNAi_12	UAS-YippeeRNAi_12_20
UAS-YippeeRNAi	58	13	1	UAS-YippeeRNAi_13	UAS-YippeeRNAi_13_1
UAS-YippeeRNAi	51	13	2	UAS-YippeeRNAi_13	UAS-YippeeRNAi_13_2
UAS-YippeeRNAi	62	13	3	UAS-YippeeRNAi_13	UAS-YippeeRNAi_13_3
UAS-YippeeRNAi	62	13	4	UAS-YippeeRNAi_13	UAS-YippeeRNAi_13_4
UAS-YippeeRNAi	46	13	5	UAS-YippeeRNAi_13	UAS-YippeeRNAi_13_5
UAS-YippeeRNAi	73	13	6	UAS-YippeeRNAi_13	UAS-YippeeRNAi_13_6
UAS-YippeeRNAi	63	13	7	UAS-YippeeRNAi_13	UAS-YippeeRNAi_13_7
UAS-YippeeRNAi	44	13	8	UAS-YippeeRNAi_13	UAS-YippeeRNAi_13_8
UAS-YippeeRNAi	50	13	9	UAS-YippeeRNAi_13	UAS-YippeeRNAi_13_9
UAS-YippeeRNAi	46	13	10	UAS-YippeeRNAi_13	UAS-YippeeRNAi_13_10
UAS-YippeeRNAi	52	13	11	UAS-YippeeRNAi_13	UAS-YippeeRNAi_13_11
UAS-YippeeRNAi	46	13	12	UAS-YippeeRNAi_13	UAS-YippeeRNAi_13_12
UAS-YippeeRNAi	49	13	13	UAS-YippeeRNAi_13	UAS-YippeeRNAi_13_13
UAS-YippeeRNAi	55	13	14	UAS-YippeeRNAi_13	UAS-YippeeRNAi_13_14
UAS-YippeeRNAi	56	13	15	UAS-YippeeRNAi_13	UAS-YippeeRNAi_13_15
UAS-YippeeRNAi	78	13	16	UAS-YippeeRNAi_13	UAS-YippeeRNAi_13_16
UAS-YippeeRNAi	56	13	17	UAS-YippeeRNAi_13	UAS-YippeeRNAi_13_17
UAS-YippeeRNAi	68	13	18	UAS-YippeeRNAi_13	UAS-YippeeRNAi_13_18
UAS-YippeeRNAi	65	13	19	UAS-YippeeRNAi_13	UAS-YippeeRNAi_13_19
UAS-YippeeRNAi	50	13	20	UAS-YippeeRNAi_13	UAS-YippeeRNAi_13_20
UAS-YippeeRNAi	75	14	1	UAS-YippeeRNAi_14	UAS-YippeeRNAi_14_1
UAS-YippeeRNAi	73	14	2	UAS-YippeeRNAi_14	UAS-YippeeRNAi_14_2
UAS-YippeeRNAi	79	14	3	UAS-YippeeRNAi_14	UAS-YippeeRNAi_14_3
UAS-YippeeRNAi	82	14	4	UAS-YippeeRNAi_14	UAS-YippeeRNAi_14_4
UAS-YippeeRNAi	96	14	5	UAS-YippeeRNAi_14	UAS-YippeeRNAi_14_5
UAS-YippeeRNAi	88	14	6	UAS-YippeeRNAi_14	UAS-YippeeRNAi_14_6
UAS-YippeeRNAi	74	14	7	UAS-YippeeRNAi_14	UAS-YippeeRNAi_14_7
UAS-YippeeRNAi	68	14	8	UAS-YippeeRNAi_14	UAS-YippeeRNAi_14_8
UAS-YippeeRNAi	75	14	9	UAS-YippeeRNAi_14	UAS-YippeeRNAi_14_9
UAS-YippeeRNAi	76	14	10	UAS-YippeeRNAi_14	UAS-YippeeRNAi_14_10
UAS-YippeeRNAi	72	14	11	UAS-YippeeRNAi_14	UAS-YippeeRNAi_14_11
UAS-YippeeRNAi	80	14	12	UAS-YippeeRNAi_14	UAS-YippeeRNAi_14_12
UAS-YippeeRNAi	84	14	13	UAS-YippeeRNAi_14	UAS-YippeeRNAi_14_13
UAS-YippeeRNAi	86	14	14	UAS-YippeeRNAi_14	UAS-YippeeRNAi_14_14
UAS-YippeeRNAi	83	14	15	UAS-YippeeRNAi_14	UAS-YippeeRNAi_14_15
UAS-YippeeRNAi	86	14	16	UAS-YippeeRNAi_14	UAS-YippeeRNAi_14_16
UAS-YippeeRNAi	87	14	17	UAS-YippeeRNAi_14	UAS-YippeeRNAi_14_17
UAS-YippeeRNAi	79	14	18	UAS-YippeeRNAi_14	UAS-YippeeRNAi_14_18
UAS-YippeeRNAi	76	14	19	UAS-YippeeRNAi_14	UAS-YippeeRNAi_14_19
UAS-YippeeRNAi	77	14	20	UAS-YippeeRNAi_14	UAS-YippeeRNAi_14_20
UAS-YippeeRNAi	86	15	1	UAS-YippeeRNAi_15	UAS-YippeeRNAi_15_1
UAS-YippeeRNAi	61	15	2	UAS-YippeeRNAi_15	UAS-YippeeRNAi_15_2
UAS-YippeeRNAi	97	15	3	UAS-YippeeRNAi_15	UAS-YippeeRNAi_15_3
UAS-YippeeRNAi	92	15	4	UAS-YippeeRNAi_15	UAS-YippeeRNAi_15_4
UAS-YippeeRNAi	59	15	5	UAS-YippeeRNAi_15	UAS-YippeeRNAi_15_5
UAS-YippeeRNAi	98	15	6	UAS-YippeeRNAi_15	UAS-YippeeRNAi_15_6
UAS-YippeeRNAi	87	15	7	UAS-YippeeRNAi_15	UAS-YippeeRNAi_15_7
UAS-YippeeRNAi	81	15	8	UAS-YippeeRNAi_15	UAS-YippeeRNAi_15_8
UAS-YippeeRNAi	82	15	9	UAS-YippeeRNAi_15	UAS-YippeeRNAi_15_9
UAS-YippeeRNAi	42	15	10	UAS-YippeeRNAi_15	UAS-YippeeRNAi_15_10
UAS-YippeeRNAi	86	15	11	UAS-YippeeRNAi_15	UAS-YippeeRNAi_15_11
UAS-YippeeRNAi	65	15	12	UAS-YippeeRNAi_15	UAS-YippeeRNAi_15_12
UAS-YippeeRNAi	90	15	13	UAS-YippeeRNAi_15	UAS-YippeeRNAi_15_13
UAS-YippeeRNAi	83	15	14	UAS-YippeeRNAi_15	UAS-YippeeRNAi_15_14
UAS-YippeeRNAi	85	15	15	UAS-YippeeRNAi_15	UAS-YippeeRNAi_15_15
UAS-YippeeRNAi	88	15	16	UAS-YippeeRNAi_15	UAS-YippeeRNAi_15_16
UAS-YippeeRNAi	94	15	17	UAS-YippeeRNAi_15	UAS-YippeeRNAi_15_17
UAS-YippeeRNAi	94	15	18	UAS-YippeeRNAi_15	UAS-YippeeRNAi_15_18
UAS-YippeeRNAi	87	15	19	UAS-YippeeRNAi_15	UAS-YippeeRNAi_15_19
UAS-YippeeRNAi	82	15	20	UAS-YippeeRNAi_15	UAS-YippeeRNAi_15_20
Act5C-GAL4	49	1	1	Act5C-GAL4_1	Act5C-GAL4_1_1
Act5C-GAL4	67	1	2	Act5C-GAL4_1	Act5C-GAL4_1_2
Act5C-GAL4	61	1	3	Act5C-GAL4_1	Act5C-GAL4_1_3
Act5C-GAL4	62	1	4	Act5C-GAL4_1	Act5C-GAL4_1_4
Act5C-GAL4	59	1	5	Act5C-GAL4_1	Act5C-GAL4_1_5
Act5C-GAL4	56	1	6	Act5C-GAL4_1	Act5C-GAL4_1_6
Act5C-GAL4	83	1	7	Act5C-GAL4_1	Act5C-GAL4_1_7
Act5C-GAL4	71	1	8	Act5C-GAL4_1	Act5C-GAL4_1_8
Act5C-GAL4	60	1	9	Act5C-GAL4_1	Act5C-GAL4_1_9
Act5C-GAL4	66	1	10	Act5C-GAL4_1	Act5C-GAL4_1_10
Act5C-GAL4	62	1	11	Act5C-GAL4_1	Act5C-GAL4_1_11
Act5C-GAL4	55	1	12	Act5C-GAL4_1	Act5C-GAL4_1_12
Act5C-GAL4	56	1	13	Act5C-GAL4_1	Act5C-GAL4_1_13
Act5C-GAL4	60	1	14	Act5C-GAL4_1	Act5C-GAL4_1_14
Act5C-GAL4	72	1	15	Act5C-GAL4_1	Act5C-GAL4_1_15
Act5C-GAL4	70	1	16	Act5C-GAL4_1	Act5C-GAL4_1_16
Act5C-GAL4	71	1	17	Act5C-GAL4_1	Act5C-GAL4_1_17
Act5C-GAL4	77	1	18	Act5C-GAL4_1	Act5C-GAL4_1_18
Act5C-GAL4	106	1	19	Act5C-GAL4_1	Act5C-GAL4_1_19
Act5C-GAL4	87	1	20	Act5C-GAL4_1	Act5C-GAL4_1_20
Act5C-GAL4	48	2	1	Act5C-GAL4_2	Act5C-GAL4_2_1
Act5C-GAL4	80	2	2	Act5C-GAL4_2	Act5C-GAL4_2_2
Act5C-GAL4	67	2	3	Act5C-GAL4_2	Act5C-GAL4_2_3
Act5C-GAL4	73	2	4	Act5C-GAL4_2	Act5C-GAL4_2_4
Act5C-GAL4	68	2	5	Act5C-GAL4_2	Act5C-GAL4_2_5
Act5C-GAL4	71	2	6	Act5C-GAL4_2	Act5C-GAL4_2_6
Act5C-GAL4	70	2	7	Act5C-GAL4_2	Act5C-GAL4_2_7
Act5C-GAL4	71	2	8	Act5C-GAL4_2	Act5C-GAL4_2_8
Act5C-GAL4	64	2	9	Act5C-GAL4_2	Act5C-GAL4_2_9
Act5C-GAL4	67	2	10	Act5C-GAL4_2	Act5C-GAL4_2_10
Act5C-GAL4	68	2	11	Act5C-GAL4_2	Act5C-GAL4_2_11
Act5C-GAL4	71	2	12	Act5C-GAL4_2	Act5C-GAL4_2_12
Act5C-GAL4	67	2	13	Act5C-GAL4_2	Act5C-GAL4_2_13
Act5C-GAL4	79	2	14	Act5C-GAL4_2	Act5C-GAL4_2_14
Act5C-GAL4	69	2	15	Act5C-GAL4_2	Act5C-GAL4_2_15
Act5C-GAL4	70	2	16	Act5C-GAL4_2	Act5C-GAL4_2_16
Act5C-GAL4	71	2	17	Act5C-GAL4_2	Act5C-GAL4_2_17
Act5C-GAL4	56	2	18	Act5C-GAL4_2	Act5C-GAL4_2_18
Act5C-GAL4	73	2	19	Act5C-GAL4_2	Act5C-GAL4_2_19
Act5C-GAL4	79	2	20	Act5C-GAL4_2	Act5C-GAL4_2_20
Act5C-GAL4	50	3	1	Act5C-GAL4_3	Act5C-GAL4_3_1
Act5C-GAL4	57	3	2	Act5C-GAL4_3	Act5C-GAL4_3_2
Act5C-GAL4	58	3	3	Act5C-GAL4_3	Act5C-GAL4_3_3
Act5C-GAL4	55	3	4	Act5C-GAL4_3	Act5C-GAL4_3_4
Act5C-GAL4	59	3	5	Act5C-GAL4_3	Act5C-GAL4_3_5
Act5C-GAL4	56	3	6	Act5C-GAL4_3	Act5C-GAL4_3_6
Act5C-GAL4	54	3	7	Act5C-GAL4_3	Act5C-GAL4_3_7
Act5C-GAL4	53	3	8	Act5C-GAL4_3	Act5C-GAL4_3_8
Act5C-GAL4	57	3	9	Act5C-GAL4_3	Act5C-GAL4_3_9
Act5C-GAL4	57	3	10	Act5C-GAL4_3	Act5C-GAL4_3_10
Act5C-GAL4	52	3	11	Act5C-GAL4_3	Act5C-GAL4_3_11
Act5C-GAL4	73	3	12	Act5C-GAL4_3	Act5C-GAL4_3_12
Act5C-GAL4	67	3	13	Act5C-GAL4_3	Act5C-GAL4_3_13
Act5C-GAL4	54	3	14	Act5C-GAL4_3	Act5C-GAL4_3_14
Act5C-GAL4	72	3	15	Act5C-GAL4_3	Act5C-GAL4_3_15
Act5C-GAL4	62	3	16	Act5C-GAL4_3	Act5C-GAL4_3_16
Act5C-GAL4	63	3	17	Act5C-GAL4_3	Act5C-GAL4_3_17
Act5C-GAL4	53	3	18	Act5C-GAL4_3	Act5C-GAL4_3_18
Act5C-GAL4	72	3	19	Act5C-GAL4_3	Act5C-GAL4_3_19
Act5C-GAL4	62	3	20	Act5C-GAL4_3	Act5C-GAL4_3_20
Act5C-GAL4	72	4	1	Act5C-GAL4_4	Act5C-GAL4_4_1
Act5C-GAL4	73	4	2	Act5C-GAL4_4	Act5C-GAL4_4_2
Act5C-GAL4	83	4	3	Act5C-GAL4_4	Act5C-GAL4_4_3
Act5C-GAL4	78	4	4	Act5C-GAL4_4	Act5C-GAL4_4_4
Act5C-GAL4	73	4	5	Act5C-GAL4_4	Act5C-GAL4_4_5
Act5C-GAL4	75	4	6	Act5C-GAL4_4	Act5C-GAL4_4_6
Act5C-GAL4	67	4	7	Act5C-GAL4_4	Act5C-GAL4_4_7
Act5C-GAL4	65	4	8	Act5C-GAL4_4	Act5C-GAL4_4_8
Act5C-GAL4	69	4	9	Act5C-GAL4_4	Act5C-GAL4_4_9
Act5C-GAL4	70	4	10	Act5C-GAL4_4	Act5C-GAL4_4_10
Act5C-GAL4	81	4	11	Act5C-GAL4_4	Act5C-GAL4_4_11
Act5C-GAL4	94	4	12	Act5C-GAL4_4	Act5C-GAL4_4_12
Act5C-GAL4	62	4	13	Act5C-GAL4_4	Act5C-GAL4_4_13
Act5C-GAL4	71	4	14	Act5C-GAL4_4	Act5C-GAL4_4_14
Act5C-GAL4	78	4	15	Act5C-GAL4_4	Act5C-GAL4_4_15
Act5C-GAL4	64	4	16	Act5C-GAL4_4	Act5C-GAL4_4_16
Act5C-GAL4	66	4	17	Act5C-GAL4_4	Act5C-GAL4_4_17
Act5C-GAL4	54	4	18	Act5C-GAL4_4	Act5C-GAL4_4_18
Act5C-GAL4	70	4	19	Act5C-GAL4_4	Act5C-GAL4_4_19
Act5C-GAL4	67	4	20	Act5C-GAL4_4	Act5C-GAL4_4_20
Act5C-GAL4	79	5	1	Act5C-GAL4_5	Act5C-GAL4_5_1
Act5C-GAL4	71	5	2	Act5C-GAL4_5	Act5C-GAL4_5_2
Act5C-GAL4	55	5	3	Act5C-GAL4_5	Act5C-GAL4_5_3
Act5C-GAL4	71	5	4	Act5C-GAL4_5	Act5C-GAL4_5_4
Act5C-GAL4	86	5	5	Act5C-GAL4_5	Act5C-GAL4_5_5
Act5C-GAL4	80	5	6	Act5C-GAL4_5	Act5C-GAL4_5_6
Act5C-GAL4	75	5	7	Act5C-GAL4_5	Act5C-GAL4_5_7
Act5C-GAL4	77	5	8	Act5C-GAL4_5	Act5C-GAL4_5_8
Act5C-GAL4	64	5	9	Act5C-GAL4_5	Act5C-GAL4_5_9
Act5C-GAL4	60	5	10	Act5C-GAL4_5	Act5C-GAL4_5_10
Act5C-GAL4	86	5	11	Act5C-GAL4_5	Act5C-GAL4_5_11
Act5C-GAL4	66	5	12	Act5C-GAL4_5	Act5C-GAL4_5_12
Act5C-GAL4	45	5	13	Act5C-GAL4_5	Act5C-GAL4_5_13
Act5C-GAL4	58	5	14	Act5C-GAL4_5	Act5C-GAL4_5_14
Act5C-GAL4	75	5	15	Act5C-GAL4_5	Act5C-GAL4_5_15
Act5C-GAL4	64	5	16	Act5C-GAL4_5	Act5C-GAL4_5_16
Act5C-GAL4	76	5	17	Act5C-GAL4_5	Act5C-GAL4_5_17
Act5C-GAL4	72	5	18	Act5C-GAL4_5	Act5C-GAL4_5_18
Act5C-GAL4	56	5	19	Act5C-GAL4_5	Act5C-GAL4_5_19
Act5C-GAL4	83	5	20	Act5C-GAL4_5	Act5C-GAL4_5_20
Act5C-GAL4	61	6	1	Act5C-GAL4_6	Act5C-GAL4_6_1
Act5C-GAL4	60	6	2	Act5C-GAL4_6	Act5C-GAL4_6_2
Act5C-GAL4	59	6	3	Act5C-GAL4_6	Act5C-GAL4_6_3
Act5C-GAL4	60	6	4	Act5C-GAL4_6	Act5C-GAL4_6_4
Act5C-GAL4	72	6	5	Act5C-GAL4_6	Act5C-GAL4_6_5
Act5C-GAL4	75	6	6	Act5C-GAL4_6	Act5C-GAL4_6_6
Act5C-GAL4	63	6	7	Act5C-GAL4_6	Act5C-GAL4_6_7
Act5C-GAL4	61	6	8	Act5C-GAL4_6	Act5C-GAL4_6_8
Act5C-GAL4	64	6	9	Act5C-GAL4_6	Act5C-GAL4_6_9
Act5C-GAL4	68	6	10	Act5C-GAL4_6	Act5C-GAL4_6_10
Act5C-GAL4	54	6	11	Act5C-GAL4_6	Act5C-GAL4_6_11
Act5C-GAL4	60	6	12	Act5C-GAL4_6	Act5C-GAL4_6_12
Act5C-GAL4	68	6	13	Act5C-GAL4_6	Act5C-GAL4_6_13
Act5C-GAL4	56	6	14	Act5C-GAL4_6	Act5C-GAL4_6_14
Act5C-GAL4	72	6	15	Act5C-GAL4_6	Act5C-GAL4_6_15
Act5C-GAL4	46	6	16	Act5C-GAL4_6	Act5C-GAL4_6_16
Act5C-GAL4	63	6	17	Act5C-GAL4_6	Act5C-GAL4_6_17
Act5C-GAL4	59	6	18	Act5C-GAL4_6	Act5C-GAL4_6_18
Act5C-GAL4	65	6	19	Act5C-GAL4_6	Act5C-GAL4_6_19
Act5C-GAL4	79	6	20	Act5C-GAL4_6	Act5C-GAL4_6_20
Act5C-GAL4	64	7	1	Act5C-GAL4_7	Act5C-GAL4_7_1
Act5C-GAL4	71	7	2	Act5C-GAL4_7	Act5C-GAL4_7_2
Act5C-GAL4	81	7	3	Act5C-GAL4_7	Act5C-GAL4_7_3
Act5C-GAL4	67	7	4	Act5C-GAL4_7	Act5C-GAL4_7_4
Act5C-GAL4	70	7	5	Act5C-GAL4_7	Act5C-GAL4_7_5
Act5C-GAL4	69	7	6	Act5C-GAL4_7	Act5C-GAL4_7_6
Act5C-GAL4	44	7	7	Act5C-GAL4_7	Act5C-GAL4_7_7
Act5C-GAL4	64	7	8	Act5C-GAL4_7	Act5C-GAL4_7_8
Act5C-GAL4	75	7	9	Act5C-GAL4_7	Act5C-GAL4_7_9
Act5C-GAL4	72	7	10	Act5C-GAL4_7	Act5C-GAL4_7_10
Act5C-GAL4	67	7	11	Act5C-GAL4_7	Act5C-GAL4_7_11
Act5C-GAL4	80	7	12	Act5C-GAL4_7	Act5C-GAL4_7_12
Act5C-GAL4	78	7	13	Act5C-GAL4_7	Act5C-GAL4_7_13
Act5C-GAL4	63	7	14	Act5C-GAL4_7	Act5C-GAL4_7_14
Act5C-GAL4	87	7	15	Act5C-GAL4_7	Act5C-GAL4_7_15
Act5C-GAL4	59	7	16	Act5C-GAL4_7	Act5C-GAL4_7_16
Act5C-GAL4	70	7	17	Act5C-GAL4_7	Act5C-GAL4_7_17
Act5C-GAL4	42	7	18	Act5C-GAL4_7	Act5C-GAL4_7_18
Act5C-GAL4	56	7	19	Act5C-GAL4_7	Act5C-GAL4_7_19
Act5C-GAL4	54	7	20	Act5C-GAL4_7	Act5C-GAL4_7_20
Act5C-GAL4	85	8	1	Act5C-GAL4_8	Act5C-GAL4_8_1
Act5C-GAL4	84	8	2	Act5C-GAL4_8	Act5C-GAL4_8_2
Act5C-GAL4	80	8	3	Act5C-GAL4_8	Act5C-GAL4_8_3
Act5C-GAL4	60	8	4	Act5C-GAL4_8	Act5C-GAL4_8_4
Act5C-GAL4	64	8	5	Act5C-GAL4_8	Act5C-GAL4_8_5
Act5C-GAL4	63	8	6	Act5C-GAL4_8	Act5C-GAL4_8_6
Act5C-GAL4	54	8	7	Act5C-GAL4_8	Act5C-GAL4_8_7
Act5C-GAL4	65	8	8	Act5C-GAL4_8	Act5C-GAL4_8_8
Act5C-GAL4	68	8	9	Act5C-GAL4_8	Act5C-GAL4_8_9
Act5C-GAL4	86	8	10	Act5C-GAL4_8	Act5C-GAL4_8_10
Act5C-GAL4	75	8	11	Act5C-GAL4_8	Act5C-GAL4_8_11
Act5C-GAL4	67	8	12	Act5C-GAL4_8	Act5C-GAL4_8_12
Act5C-GAL4	77	8	13	Act5C-GAL4_8	Act5C-GAL4_8_13
Act5C-GAL4	73	8	14	Act5C-GAL4_8	Act5C-GAL4_8_14
Act5C-GAL4	61	8	15	Act5C-GAL4_8	Act5C-GAL4_8_15
Act5C-GAL4	65	8	16	Act5C-GAL4_8	Act5C-GAL4_8_16
Act5C-GAL4	63	8	17	Act5C-GAL4_8	Act5C-GAL4_8_17
Act5C-GAL4	68	8	18	Act5C-GAL4_8	Act5C-GAL4_8_18
Act5C-GAL4	80	8	19	Act5C-GAL4_8	Act5C-GAL4_8_19
Act5C-GAL4	73	8	20	Act5C-GAL4_8	Act5C-GAL4_8_20
Act5C-GAL4	52	9	1	Act5C-GAL4_9	Act5C-GAL4_9_1
Act5C-GAL4	78	9	2	Act5C-GAL4_9	Act5C-GAL4_9_2
Act5C-GAL4	74	9	3	Act5C-GAL4_9	Act5C-GAL4_9_3
Act5C-GAL4	82	9	4	Act5C-GAL4_9	Act5C-GAL4_9_4
Act5C-GAL4	86	9	5	Act5C-GAL4_9	Act5C-GAL4_9_5
Act5C-GAL4	67	9	6	Act5C-GAL4_9	Act5C-GAL4_9_6
Act5C-GAL4	72	9	7	Act5C-GAL4_9	Act5C-GAL4_9_7
Act5C-GAL4	78	9	8	Act5C-GAL4_9	Act5C-GAL4_9_8
Act5C-GAL4	77	9	9	Act5C-GAL4_9	Act5C-GAL4_9_9
Act5C-GAL4	75	9	10	Act5C-GAL4_9	Act5C-GAL4_9_10
Act5C-GAL4	64	9	11	Act5C-GAL4_9	Act5C-GAL4_9_11
Act5C-GAL4	63	9	12	Act5C-GAL4_9	Act5C-GAL4_9_12
Act5C-GAL4	70	9	13	Act5C-GAL4_9	Act5C-GAL4_9_13
Act5C-GAL4	61	9	14	Act5C-GAL4_9	Act5C-GAL4_9_14
Act5C-GAL4	66	9	15	Act5C-GAL4_9	Act5C-GAL4_9_15
Act5C-GAL4	64	9	16	Act5C-GAL4_9	Act5C-GAL4_9_16
Act5C-GAL4	62	9	17	Act5C-GAL4_9	Act5C-GAL4_9_17
Act5C-GAL4	61	9	18	Act5C-GAL4_9	Act5C-GAL4_9_18
Act5C-GAL4	76	9	19	Act5C-GAL4_9	Act5C-GAL4_9_19
Act5C-GAL4	62	9	20	Act5C-GAL4_9	Act5C-GAL4_9_20
Act5C-GAL4	60	10	1	Act5C-GAL4_10	Act5C-GAL4_10_1
Act5C-GAL4	60	10	2	Act5C-GAL4_10	Act5C-GAL4_10_2
Act5C-GAL4	58	10	3	Act5C-GAL4_10	Act5C-GAL4_10_3
Act5C-GAL4	51	10	4	Act5C-GAL4_10	Act5C-GAL4_10_4
Act5C-GAL4	45	10	5	Act5C-GAL4_10	Act5C-GAL4_10_5
Act5C-GAL4	52	10	6	Act5C-GAL4_10	Act5C-GAL4_10_6
Act5C-GAL4	47	10	7	Act5C-GAL4_10	Act5C-GAL4_10_7
Act5C-GAL4	47	10	8	Act5C-GAL4_10	Act5C-GAL4_10_8
Act5C-GAL4	54	10	9	Act5C-GAL4_10	Act5C-GAL4_10_9
Act5C-GAL4	58	10	10	Act5C-GAL4_10	Act5C-GAL4_10_10
Act5C-GAL4	73	10	11	Act5C-GAL4_10	Act5C-GAL4_10_11
Act5C-GAL4	76	10	12	Act5C-GAL4_10	Act5C-GAL4_10_12
Act5C-GAL4	55	10	13	Act5C-GAL4_10	Act5C-GAL4_10_13
Act5C-GAL4	61	10	14	Act5C-GAL4_10	Act5C-GAL4_10_14
Act5C-GAL4	47	10	15	Act5C-GAL4_10	Act5C-GAL4_10_15
Act5C-GAL4	47	10	16	Act5C-GAL4_10	Act5C-GAL4_10_16
Act5C-GAL4	49	10	17	Act5C-GAL4_10	Act5C-GAL4_10_17
Act5C-GAL4	44	10	18	Act5C-GAL4_10	Act5C-GAL4_10_18
Act5C-GAL4	53	10	19	Act5C-GAL4_10	Act5C-GAL4_10_19
Act5C-GAL4	53	10	20	Act5C-GAL4_10	Act5C-GAL4_10_20
Act5C-GAL4	57	11	1	Act5C-GAL4_11	Act5C-GAL4_11_1
Act5C-GAL4	55	11	2	Act5C-GAL4_11	Act5C-GAL4_11_2
Act5C-GAL4	62	11	3	Act5C-GAL4_11	Act5C-GAL4_11_3
Act5C-GAL4	56	11	4	Act5C-GAL4_11	Act5C-GAL4_11_4
Act5C-GAL4	75	11	5	Act5C-GAL4_11	Act5C-GAL4_11_5
Act5C-GAL4	71	11	6	Act5C-GAL4_11	Act5C-GAL4_11_6
Act5C-GAL4	63	11	7	Act5C-GAL4_11	Act5C-GAL4_11_7
Act5C-GAL4	79	11	8	Act5C-GAL4_11	Act5C-GAL4_11_8
Act5C-GAL4	69	11	9	Act5C-GAL4_11	Act5C-GAL4_11_9
Act5C-GAL4	48	11	10	Act5C-GAL4_11	Act5C-GAL4_11_10
Act5C-GAL4	57	11	11	Act5C-GAL4_11	Act5C-GAL4_11_11
Act5C-GAL4	35	11	12	Act5C-GAL4_11	Act5C-GAL4_11_12
Act5C-GAL4	65	11	13	Act5C-GAL4_11	Act5C-GAL4_11_13
Act5C-GAL4	70	11	14	Act5C-GAL4_11	Act5C-GAL4_11_14
Act5C-GAL4	45	11	15	Act5C-GAL4_11	Act5C-GAL4_11_15
Act5C-GAL4	61	11	16	Act5C-GAL4_11	Act5C-GAL4_11_16
Act5C-GAL4	44	11	17	Act5C-GAL4_11	Act5C-GAL4_11_17
Act5C-GAL4	64	11	18	Act5C-GAL4_11	Act5C-GAL4_11_18
Act5C-GAL4	70	11	19	Act5C-GAL4_11	Act5C-GAL4_11_19
Act5C-GAL4	88	11	20	Act5C-GAL4_11	Act5C-GAL4_11_20
Act5C-GAL4	66	12	1	Act5C-GAL4_12	Act5C-GAL4_12_1
Act5C-GAL4	74	12	2	Act5C-GAL4_12	Act5C-GAL4_12_2
Act5C-GAL4	63	12	3	Act5C-GAL4_12	Act5C-GAL4_12_3
Act5C-GAL4	52	12	4	Act5C-GAL4_12	Act5C-GAL4_12_4
Act5C-GAL4	65	12	5	Act5C-GAL4_12	Act5C-GAL4_12_5
Act5C-GAL4	70	12	6	Act5C-GAL4_12	Act5C-GAL4_12_6
Act5C-GAL4	77	12	7	Act5C-GAL4_12	Act5C-GAL4_12_7
Act5C-GAL4	74	12	8	Act5C-GAL4_12	Act5C-GAL4_12_8
Act5C-GAL4	83	12	9	Act5C-GAL4_12	Act5C-GAL4_12_9
Act5C-GAL4	82	12	10	Act5C-GAL4_12	Act5C-GAL4_12_10
Act5C-GAL4	73	12	11	Act5C-GAL4_12	Act5C-GAL4_12_11
Act5C-GAL4	73	12	12	Act5C-GAL4_12	Act5C-GAL4_12_12
Act5C-GAL4	69	12	13	Act5C-GAL4_12	Act5C-GAL4_12_13
Act5C-GAL4	64	12	14	Act5C-GAL4_12	Act5C-GAL4_12_14
Act5C-GAL4	68	12	15	Act5C-GAL4_12	Act5C-GAL4_12_15
Act5C-GAL4	70	12	16	Act5C-GAL4_12	Act5C-GAL4_12_16
Act5C-GAL4	66	12	17	Act5C-GAL4_12	Act5C-GAL4_12_17
Act5C-GAL4	87	12	18	Act5C-GAL4_12	Act5C-GAL4_12_18
Act5C-GAL4	85	12	19	Act5C-GAL4_12	Act5C-GAL4_12_19
Act5C-GAL4	89	12	20	Act5C-GAL4_12	Act5C-GAL4_12_20
Act5C-GAL4	62	13	1	Act5C-GAL4_13	Act5C-GAL4_13_1
Act5C-GAL4	65	13	2	Act5C-GAL4_13	Act5C-GAL4_13_2
Act5C-GAL4	61	13	3	Act5C-GAL4_13	Act5C-GAL4_13_3
Act5C-GAL4	60	13	4	Act5C-GAL4_13	Act5C-GAL4_13_4
Act5C-GAL4	46	13	5	Act5C-GAL4_13	Act5C-GAL4_13_5
Act5C-GAL4	39	13	6	Act5C-GAL4_13	Act5C-GAL4_13_6
Act5C-GAL4	71	13	7	Act5C-GAL4_13	Act5C-GAL4_13_7
Act5C-GAL4	72	13	8	Act5C-GAL4_13	Act5C-GAL4_13_8
Act5C-GAL4	46	13	9	Act5C-GAL4_13	Act5C-GAL4_13_9
Act5C-GAL4	69	13	10	Act5C-GAL4_13	Act5C-GAL4_13_10
Act5C-GAL4	75	13	11	Act5C-GAL4_13	Act5C-GAL4_13_11
Act5C-GAL4	63	13	12	Act5C-GAL4_13	Act5C-GAL4_13_12
Act5C-GAL4	73	13	13	Act5C-GAL4_13	Act5C-GAL4_13_13
Act5C-GAL4	82	13	14	Act5C-GAL4_13	Act5C-GAL4_13_14
Act5C-GAL4	72	13	15	Act5C-GAL4_13	Act5C-GAL4_13_15
Act5C-GAL4	67	13	16	Act5C-GAL4_13	Act5C-GAL4_13_16
Act5C-GAL4	52	13	17	Act5C-GAL4_13	Act5C-GAL4_13_17
Act5C-GAL4	66	13	18	Act5C-GAL4_13	Act5C-GAL4_13_18
Act5C-GAL4	71	13	19	Act5C-GAL4_13	Act5C-GAL4_13_19
Act5C-GAL4	83	13	20	Act5C-GAL4_13	Act5C-GAL4_13_20
Act5C-GAL4	64	14	1	Act5C-GAL4_14	Act5C-GAL4_14_1
Act5C-GAL4	76	14	2	Act5C-GAL4_14	Act5C-GAL4_14_2
Act5C-GAL4	77	14	3	Act5C-GAL4_14	Act5C-GAL4_14_3
Act5C-GAL4	83	14	4	Act5C-GAL4_14	Act5C-GAL4_14_4
Act5C-GAL4	76	14	5	Act5C-GAL4_14	Act5C-GAL4_14_5
Act5C-GAL4	74	14	6	Act5C-GAL4_14	Act5C-GAL4_14_6
Act5C-GAL4	78	14	7	Act5C-GAL4_14	Act5C-GAL4_14_7
Act5C-GAL4	76	14	8	Act5C-GAL4_14	Act5C-GAL4_14_8
Act5C-GAL4	76	14	9	Act5C-GAL4_14	Act5C-GAL4_14_9
Act5C-GAL4	87	14	10	Act5C-GAL4_14	Act5C-GAL4_14_10
Act5C-GAL4	69	14	11	Act5C-GAL4_14	Act5C-GAL4_14_11
Act5C-GAL4	74	14	12	Act5C-GAL4_14	Act5C-GAL4_14_12
Act5C-GAL4	87	14	13	Act5C-GAL4_14	Act5C-GAL4_14_13
Act5C-GAL4	90	14	14	Act5C-GAL4_14	Act5C-GAL4_14_14
Act5C-GAL4	86	14	15	Act5C-GAL4_14	Act5C-GAL4_14_15
Act5C-GAL4	89	14	16	Act5C-GAL4_14	Act5C-GAL4_14_16
Act5C-GAL4	78	14	17	Act5C-GAL4_14	Act5C-GAL4_14_17
Act5C-GAL4	83	14	18	Act5C-GAL4_14	Act5C-GAL4_14_18
Act5C-GAL4	82	14	19	Act5C-GAL4_14	Act5C-GAL4_14_19
Act5C-GAL4	87	14	20	Act5C-GAL4_14	Act5C-GAL4_14_20
Act5C-GAL4	78	15	1	Act5C-GAL4_15	Act5C-GAL4_15_1
Act5C-GAL4	75	15	2	Act5C-GAL4_15	Act5C-GAL4_15_2
Act5C-GAL4	90	15	3	Act5C-GAL4_15	Act5C-GAL4_15_3
Act5C-GAL4	79	15	4	Act5C-GAL4_15	Act5C-GAL4_15_4
Act5C-GAL4	77	15	5	Act5C-GAL4_15	Act5C-GAL4_15_5
Act5C-GAL4	83	15	6	Act5C-GAL4_15	Act5C-GAL4_15_6
Act5C-GAL4	79	15	7	Act5C-GAL4_15	Act5C-GAL4_15_7
Act5C-GAL4	74	15	8	Act5C-GAL4_15	Act5C-GAL4_15_8
Act5C-GAL4	74	15	9	Act5C-GAL4_15	Act5C-GAL4_15_9
Act5C-GAL4	82	15	10	Act5C-GAL4_15	Act5C-GAL4_15_10
Act5C-GAL4	85	15	11	Act5C-GAL4_15	Act5C-GAL4_15_11
Act5C-GAL4	82	15	12	Act5C-GAL4_15	Act5C-GAL4_15_12
Act5C-GAL4	76	15	13	Act5C-GAL4_15	Act5C-GAL4_15_13
Act5C-GAL4	82	15	14	Act5C-GAL4_15	Act5C-GAL4_15_14
Act5C-GAL4	85	15	15	Act5C-GAL4_15	Act5C-GAL4_15_15
Act5C-GAL4	81	15	16	Act5C-GAL4_15	Act5C-GAL4_15_16
Act5C-GAL4	87	15	17	Act5C-GAL4_15	Act5C-GAL4_15_17
Act5C-GAL4	82	15	18	Act5C-GAL4_15	Act5C-GAL4_15_18
Act5C-GAL4	77	15	19	Act5C-GAL4_15	Act5C-GAL4_15_19
Act5C-GAL4	78	15	20	Act5C-GAL4_15	Act5C-GAL4_15_20
Act5C-GAL4 > UAS-YippeeRNAi	31	1	1	Act5C-GAL4 > UAS-YippeeRNAi_1	Act5C-GAL4 > UAS-YippeeRNAi_1_1
Act5C-GAL4 > UAS-YippeeRNAi	41	1	2	Act5C-GAL4 > UAS-YippeeRNAi_1	Act5C-GAL4 > UAS-YippeeRNAi_1_2
Act5C-GAL4 > UAS-YippeeRNAi	31	1	3	Act5C-GAL4 > UAS-YippeeRNAi_1	Act5C-GAL4 > UAS-YippeeRNAi_1_3
Act5C-GAL4 > UAS-YippeeRNAi	31	1	4	Act5C-GAL4 > UAS-YippeeRNAi_1	Act5C-GAL4 > UAS-YippeeRNAi_1_4
Act5C-GAL4 > UAS-YippeeRNAi	29	1	5	Act5C-GAL4 > UAS-YippeeRNAi_1	Act5C-GAL4 > UAS-YippeeRNAi_1_5
Act5C-GAL4 > UAS-YippeeRNAi	35	1	6	Act5C-GAL4 > UAS-YippeeRNAi_1	Act5C-GAL4 > UAS-YippeeRNAi_1_6
Act5C-GAL4 > UAS-YippeeRNAi	30	1	7	Act5C-GAL4 > UAS-YippeeRNAi_1	Act5C-GAL4 > UAS-YippeeRNAi_1_7
Act5C-GAL4 > UAS-YippeeRNAi	31	1	8	Act5C-GAL4 > UAS-YippeeRNAi_1	Act5C-GAL4 > UAS-YippeeRNAi_1_8
Act5C-GAL4 > UAS-YippeeRNAi	28	1	9	Act5C-GAL4 > UAS-YippeeRNAi_1	Act5C-GAL4 > UAS-YippeeRNAi_1_9
Act5C-GAL4 > UAS-YippeeRNAi	28	1	10	Act5C-GAL4 > UAS-YippeeRNAi_1	Act5C-GAL4 > UAS-YippeeRNAi_1_10
Act5C-GAL4 > UAS-YippeeRNAi	28	1	11	Act5C-GAL4 > UAS-YippeeRNAi_1	Act5C-GAL4 > UAS-YippeeRNAi_1_11
Act5C-GAL4 > UAS-YippeeRNAi	27	1	12	Act5C-GAL4 > UAS-YippeeRNAi_1	Act5C-GAL4 > UAS-YippeeRNAi_1_12
Act5C-GAL4 > UAS-YippeeRNAi	31	1	13	Act5C-GAL4 > UAS-YippeeRNAi_1	Act5C-GAL4 > UAS-YippeeRNAi_1_13
Act5C-GAL4 > UAS-YippeeRNAi	29	1	14	Act5C-GAL4 > UAS-YippeeRNAi_1	Act5C-GAL4 > UAS-YippeeRNAi_1_14
Act5C-GAL4 > UAS-YippeeRNAi	36	1	15	Act5C-GAL4 > UAS-YippeeRNAi_1	Act5C-GAL4 > UAS-YippeeRNAi_1_15
Act5C-GAL4 > UAS-YippeeRNAi	42	1	16	Act5C-GAL4 > UAS-YippeeRNAi_1	Act5C-GAL4 > UAS-YippeeRNAi_1_16
Act5C-GAL4 > UAS-YippeeRNAi	27	1	17	Act5C-GAL4 > UAS-YippeeRNAi_1	Act5C-GAL4 > UAS-YippeeRNAi_1_17
Act5C-GAL4 > UAS-YippeeRNAi	29	1	18	Act5C-GAL4 > UAS-YippeeRNAi_1	Act5C-GAL4 > UAS-YippeeRNAi_1_18
Act5C-GAL4 > UAS-YippeeRNAi	23	1	19	Act5C-GAL4 > UAS-YippeeRNAi_1	Act5C-GAL4 > UAS-YippeeRNAi_1_19
Act5C-GAL4 > UAS-YippeeRNAi	29	1	20	Act5C-GAL4 > UAS-YippeeRNAi_1	Act5C-GAL4 > UAS-YippeeRNAi_1_20
Act5C-GAL4 > UAS-YippeeRNAi	27	2	1	Act5C-GAL4 > UAS-YippeeRNAi_2	Act5C-GAL4 > UAS-YippeeRNAi_2_1
Act5C-GAL4 > UAS-YippeeRNAi	20	2	2	Act5C-GAL4 > UAS-YippeeRNAi_2	Act5C-GAL4 > UAS-YippeeRNAi_2_2
Act5C-GAL4 > UAS-YippeeRNAi	22	2	3	Act5C-GAL4 > UAS-YippeeRNAi_2	Act5C-GAL4 > UAS-YippeeRNAi_2_3
Act5C-GAL4 > UAS-YippeeRNAi	29	2	4	Act5C-GAL4 > UAS-YippeeRNAi_2	Act5C-GAL4 > UAS-YippeeRNAi_2_4
Act5C-GAL4 > UAS-YippeeRNAi	38	2	5	Act5C-GAL4 > UAS-YippeeRNAi_2	Act5C-GAL4 > UAS-YippeeRNAi_2_5
Act5C-GAL4 > UAS-YippeeRNAi	49	2	6	Act5C-GAL4 > UAS-YippeeRNAi_2	Act5C-GAL4 > UAS-YippeeRNAi_2_6
Act5C-GAL4 > UAS-YippeeRNAi	64	2	7	Act5C-GAL4 > UAS-YippeeRNAi_2	Act5C-GAL4 > UAS-YippeeRNAi_2_7
Act5C-GAL4 > UAS-YippeeRNAi	72	2	8	Act5C-GAL4 > UAS-YippeeRNAi_2	Act5C-GAL4 > UAS-YippeeRNAi_2_8
Act5C-GAL4 > UAS-YippeeRNAi	58	2	9	Act5C-GAL4 > UAS-YippeeRNAi_2	Act5C-GAL4 > UAS-YippeeRNAi_2_9
Act5C-GAL4 > UAS-YippeeRNAi	53	2	10	Act5C-GAL4 > UAS-YippeeRNAi_2	Act5C-GAL4 > UAS-YippeeRNAi_2_10
Act5C-GAL4 > UAS-YippeeRNAi	53	2	11	Act5C-GAL4 > UAS-YippeeRNAi_2	Act5C-GAL4 > UAS-YippeeRNAi_2_11
Act5C-GAL4 > UAS-YippeeRNAi	35	2	12	Act5C-GAL4 > UAS-YippeeRNAi_2	Act5C-GAL4 > UAS-YippeeRNAi_2_12
Act5C-GAL4 > UAS-YippeeRNAi	33	2	13	Act5C-GAL4 > UAS-YippeeRNAi_2	Act5C-GAL4 > UAS-YippeeRNAi_2_13
Act5C-GAL4 > UAS-YippeeRNAi	28	2	14	Act5C-GAL4 > UAS-YippeeRNAi_2	Act5C-GAL4 > UAS-YippeeRNAi_2_14
Act5C-GAL4 > UAS-YippeeRNAi	28	2	15	Act5C-GAL4 > UAS-YippeeRNAi_2	Act5C-GAL4 > UAS-YippeeRNAi_2_15
Act5C-GAL4 > UAS-YippeeRNAi	29	2	16	Act5C-GAL4 > UAS-YippeeRNAi_2	Act5C-GAL4 > UAS-YippeeRNAi_2_16
Act5C-GAL4 > UAS-YippeeRNAi	39	2	17	Act5C-GAL4 > UAS-YippeeRNAi_2	Act5C-GAL4 > UAS-YippeeRNAi_2_17
Act5C-GAL4 > UAS-YippeeRNAi	29	2	18	Act5C-GAL4 > UAS-YippeeRNAi_2	Act5C-GAL4 > UAS-YippeeRNAi_2_18
Act5C-GAL4 > UAS-YippeeRNAi	29	2	19	Act5C-GAL4 > UAS-YippeeRNAi_2	Act5C-GAL4 > UAS-YippeeRNAi_2_19
Act5C-GAL4 > UAS-YippeeRNAi	38	2	20	Act5C-GAL4 > UAS-YippeeRNAi_2	Act5C-GAL4 > UAS-YippeeRNAi_2_20
Act5C-GAL4 > UAS-YippeeRNAi	23	3	1	Act5C-GAL4 > UAS-YippeeRNAi_3	Act5C-GAL4 > UAS-YippeeRNAi_3_1
Act5C-GAL4 > UAS-YippeeRNAi	48	3	2	Act5C-GAL4 > UAS-YippeeRNAi_3	Act5C-GAL4 > UAS-YippeeRNAi_3_2
Act5C-GAL4 > UAS-YippeeRNAi	35	3	3	Act5C-GAL4 > UAS-YippeeRNAi_3	Act5C-GAL4 > UAS-YippeeRNAi_3_3
Act5C-GAL4 > UAS-YippeeRNAi	41	3	4	Act5C-GAL4 > UAS-YippeeRNAi_3	Act5C-GAL4 > UAS-YippeeRNAi_3_4
Act5C-GAL4 > UAS-YippeeRNAi	29	3	5	Act5C-GAL4 > UAS-YippeeRNAi_3	Act5C-GAL4 > UAS-YippeeRNAi_3_5
Act5C-GAL4 > UAS-YippeeRNAi	44	3	6	Act5C-GAL4 > UAS-YippeeRNAi_3	Act5C-GAL4 > UAS-YippeeRNAi_3_6
Act5C-GAL4 > UAS-YippeeRNAi	49	3	7	Act5C-GAL4 > UAS-YippeeRNAi_3	Act5C-GAL4 > UAS-YippeeRNAi_3_7
Act5C-GAL4 > UAS-YippeeRNAi	54	3	8	Act5C-GAL4 > UAS-YippeeRNAi_3	Act5C-GAL4 > UAS-YippeeRNAi_3_8
Act5C-GAL4 > UAS-YippeeRNAi	49	3	9	Act5C-GAL4 > UAS-YippeeRNAi_3	Act5C-GAL4 > UAS-YippeeRNAi_3_9
Act5C-GAL4 > UAS-YippeeRNAi	35	3	10	Act5C-GAL4 > UAS-YippeeRNAi_3	Act5C-GAL4 > UAS-YippeeRNAi_3_10
Act5C-GAL4 > UAS-YippeeRNAi	34	3	11	Act5C-GAL4 > UAS-YippeeRNAi_3	Act5C-GAL4 > UAS-YippeeRNAi_3_11
Act5C-GAL4 > UAS-YippeeRNAi	36	3	12	Act5C-GAL4 > UAS-YippeeRNAi_3	Act5C-GAL4 > UAS-YippeeRNAi_3_12
Act5C-GAL4 > UAS-YippeeRNAi	31	3	13	Act5C-GAL4 > UAS-YippeeRNAi_3	Act5C-GAL4 > UAS-YippeeRNAi_3_13
Act5C-GAL4 > UAS-YippeeRNAi	24	3	14	Act5C-GAL4 > UAS-YippeeRNAi_3	Act5C-GAL4 > UAS-YippeeRNAi_3_14
Act5C-GAL4 > UAS-YippeeRNAi	38	3	15	Act5C-GAL4 > UAS-YippeeRNAi_3	Act5C-GAL4 > UAS-YippeeRNAi_3_15
Act5C-GAL4 > UAS-YippeeRNAi	30	3	16	Act5C-GAL4 > UAS-YippeeRNAi_3	Act5C-GAL4 > UAS-YippeeRNAi_3_16
Act5C-GAL4 > UAS-YippeeRNAi	37	3	17	Act5C-GAL4 > UAS-YippeeRNAi_3	Act5C-GAL4 > UAS-YippeeRNAi_3_17
Act5C-GAL4 > UAS-YippeeRNAi	31	3	18	Act5C-GAL4 > UAS-YippeeRNAi_3	Act5C-GAL4 > UAS-YippeeRNAi_3_18
Act5C-GAL4 > UAS-YippeeRNAi	30	3	19	Act5C-GAL4 > UAS-YippeeRNAi_3	Act5C-GAL4 > UAS-YippeeRNAi_3_19
Act5C-GAL4 > UAS-YippeeRNAi	35	3	20	Act5C-GAL4 > UAS-YippeeRNAi_3	Act5C-GAL4 > UAS-YippeeRNAi_3_20
Act5C-GAL4 > UAS-YippeeRNAi	40	4	1	Act5C-GAL4 > UAS-YippeeRNAi_4	Act5C-GAL4 > UAS-YippeeRNAi_4_1
Act5C-GAL4 > UAS-YippeeRNAi	25	4	2	Act5C-GAL4 > UAS-YippeeRNAi_4	Act5C-GAL4 > UAS-YippeeRNAi_4_2
Act5C-GAL4 > UAS-YippeeRNAi	28	4	3	Act5C-GAL4 > UAS-YippeeRNAi_4	Act5C-GAL4 > UAS-YippeeRNAi_4_3
Act5C-GAL4 > UAS-YippeeRNAi	23	4	4	Act5C-GAL4 > UAS-YippeeRNAi_4	Act5C-GAL4 > UAS-YippeeRNAi_4_4
Act5C-GAL4 > UAS-YippeeRNAi	30	4	5	Act5C-GAL4 > UAS-YippeeRNAi_4	Act5C-GAL4 > UAS-YippeeRNAi_4_5
Act5C-GAL4 > UAS-YippeeRNAi	38	4	6	Act5C-GAL4 > UAS-YippeeRNAi_4	Act5C-GAL4 > UAS-YippeeRNAi_4_6
Act5C-GAL4 > UAS-YippeeRNAi	37	4	7	Act5C-GAL4 > UAS-YippeeRNAi_4	Act5C-GAL4 > UAS-YippeeRNAi_4_7
Act5C-GAL4 > UAS-YippeeRNAi	26	4	8	Act5C-GAL4 > UAS-YippeeRNAi_4	Act5C-GAL4 > UAS-YippeeRNAi_4_8
Act5C-GAL4 > UAS-YippeeRNAi	28	4	9	Act5C-GAL4 > UAS-YippeeRNAi_4	Act5C-GAL4 > UAS-YippeeRNAi_4_9
Act5C-GAL4 > UAS-YippeeRNAi	29	4	10	Act5C-GAL4 > UAS-YippeeRNAi_4	Act5C-GAL4 > UAS-YippeeRNAi_4_10
Act5C-GAL4 > UAS-YippeeRNAi	23	4	11	Act5C-GAL4 > UAS-YippeeRNAi_4	Act5C-GAL4 > UAS-YippeeRNAi_4_11
Act5C-GAL4 > UAS-YippeeRNAi	30	4	12	Act5C-GAL4 > UAS-YippeeRNAi_4	Act5C-GAL4 > UAS-YippeeRNAi_4_12
Act5C-GAL4 > UAS-YippeeRNAi	28	4	13	Act5C-GAL4 > UAS-YippeeRNAi_4	Act5C-GAL4 > UAS-YippeeRNAi_4_13
Act5C-GAL4 > UAS-YippeeRNAi	36	4	14	Act5C-GAL4 > UAS-YippeeRNAi_4	Act5C-GAL4 > UAS-YippeeRNAi_4_14
Act5C-GAL4 > UAS-YippeeRNAi	22	4	15	Act5C-GAL4 > UAS-YippeeRNAi_4	Act5C-GAL4 > UAS-YippeeRNAi_4_15
Act5C-GAL4 > UAS-YippeeRNAi	30	4	16	Act5C-GAL4 > UAS-YippeeRNAi_4	Act5C-GAL4 > UAS-YippeeRNAi_4_16
Act5C-GAL4 > UAS-YippeeRNAi	31	4	17	Act5C-GAL4 > UAS-YippeeRNAi_4	Act5C-GAL4 > UAS-YippeeRNAi_4_17
Act5C-GAL4 > UAS-YippeeRNAi	28	4	18	Act5C-GAL4 > UAS-YippeeRNAi_4	Act5C-GAL4 > UAS-YippeeRNAi_4_18
Act5C-GAL4 > UAS-YippeeRNAi	20	4	19	Act5C-GAL4 > UAS-YippeeRNAi_4	Act5C-GAL4 > UAS-YippeeRNAi_4_19
Act5C-GAL4 > UAS-YippeeRNAi	30	4	20	Act5C-GAL4 > UAS-YippeeRNAi_4	Act5C-GAL4 > UAS-YippeeRNAi_4_20
Act5C-GAL4 > UAS-YippeeRNAi	29	5	1	Act5C-GAL4 > UAS-YippeeRNAi_5	Act5C-GAL4 > UAS-YippeeRNAi_5_1
Act5C-GAL4 > UAS-YippeeRNAi	29	5	2	Act5C-GAL4 > UAS-YippeeRNAi_5	Act5C-GAL4 > UAS-YippeeRNAi_5_2
Act5C-GAL4 > UAS-YippeeRNAi	37	5	3	Act5C-GAL4 > UAS-YippeeRNAi_5	Act5C-GAL4 > UAS-YippeeRNAi_5_3
Act5C-GAL4 > UAS-YippeeRNAi	33	5	4	Act5C-GAL4 > UAS-YippeeRNAi_5	Act5C-GAL4 > UAS-YippeeRNAi_5_4
Act5C-GAL4 > UAS-YippeeRNAi	30	5	5	Act5C-GAL4 > UAS-YippeeRNAi_5	Act5C-GAL4 > UAS-YippeeRNAi_5_5
Act5C-GAL4 > UAS-YippeeRNAi	27	5	6	Act5C-GAL4 > UAS-YippeeRNAi_5	Act5C-GAL4 > UAS-YippeeRNAi_5_6
Act5C-GAL4 > UAS-YippeeRNAi	27	5	7	Act5C-GAL4 > UAS-YippeeRNAi_5	Act5C-GAL4 > UAS-YippeeRNAi_5_7
Act5C-GAL4 > UAS-YippeeRNAi	55	5	8	Act5C-GAL4 > UAS-YippeeRNAi_5	Act5C-GAL4 > UAS-YippeeRNAi_5_8
Act5C-GAL4 > UAS-YippeeRNAi	37	5	9	Act5C-GAL4 > UAS-YippeeRNAi_5	Act5C-GAL4 > UAS-YippeeRNAi_5_9
Act5C-GAL4 > UAS-YippeeRNAi	23	5	10	Act5C-GAL4 > UAS-YippeeRNAi_5	Act5C-GAL4 > UAS-YippeeRNAi_5_10
Act5C-GAL4 > UAS-YippeeRNAi	23	5	11	Act5C-GAL4 > UAS-YippeeRNAi_5	Act5C-GAL4 > UAS-YippeeRNAi_5_11
Act5C-GAL4 > UAS-YippeeRNAi	25	5	12	Act5C-GAL4 > UAS-YippeeRNAi_5	Act5C-GAL4 > UAS-YippeeRNAi_5_12
Act5C-GAL4 > UAS-YippeeRNAi	22	5	13	Act5C-GAL4 > UAS-YippeeRNAi_5	Act5C-GAL4 > UAS-YippeeRNAi_5_13
Act5C-GAL4 > UAS-YippeeRNAi	33	5	14	Act5C-GAL4 > UAS-YippeeRNAi_5	Act5C-GAL4 > UAS-YippeeRNAi_5_14
Act5C-GAL4 > UAS-YippeeRNAi	34	5	15	Act5C-GAL4 > UAS-YippeeRNAi_5	Act5C-GAL4 > UAS-YippeeRNAi_5_15
Act5C-GAL4 > UAS-YippeeRNAi	18	5	16	Act5C-GAL4 > UAS-YippeeRNAi_5	Act5C-GAL4 > UAS-YippeeRNAi_5_16
Act5C-GAL4 > UAS-YippeeRNAi	25	5	17	Act5C-GAL4 > UAS-YippeeRNAi_5	Act5C-GAL4 > UAS-YippeeRNAi_5_17
Act5C-GAL4 > UAS-YippeeRNAi	22	5	18	Act5C-GAL4 > UAS-YippeeRNAi_5	Act5C-GAL4 > UAS-YippeeRNAi_5_18
Act5C-GAL4 > UAS-YippeeRNAi	40	5	19	Act5C-GAL4 > UAS-YippeeRNAi_5	Act5C-GAL4 > UAS-YippeeRNAi_5_19
Act5C-GAL4 > UAS-YippeeRNAi	16	5	20	Act5C-GAL4 > UAS-YippeeRNAi_5	Act5C-GAL4 > UAS-YippeeRNAi_5_20
Act5C-GAL4 > UAS-YippeeRNAi	27	6	1	Act5C-GAL4 > UAS-YippeeRNAi_6	Act5C-GAL4 > UAS-YippeeRNAi_6_1
Act5C-GAL4 > UAS-YippeeRNAi	34	6	2	Act5C-GAL4 > UAS-YippeeRNAi_6	Act5C-GAL4 > UAS-YippeeRNAi_6_2
Act5C-GAL4 > UAS-YippeeRNAi	27	6	3	Act5C-GAL4 > UAS-YippeeRNAi_6	Act5C-GAL4 > UAS-YippeeRNAi_6_3
Act5C-GAL4 > UAS-YippeeRNAi	27	6	4	Act5C-GAL4 > UAS-YippeeRNAi_6	Act5C-GAL4 > UAS-YippeeRNAi_6_4
Act5C-GAL4 > UAS-YippeeRNAi	37	6	5	Act5C-GAL4 > UAS-YippeeRNAi_6	Act5C-GAL4 > UAS-YippeeRNAi_6_5
Act5C-GAL4 > UAS-YippeeRNAi	42	6	6	Act5C-GAL4 > UAS-YippeeRNAi_6	Act5C-GAL4 > UAS-YippeeRNAi_6_6
Act5C-GAL4 > UAS-YippeeRNAi	44	6	7	Act5C-GAL4 > UAS-YippeeRNAi_6	Act5C-GAL4 > UAS-YippeeRNAi_6_7
Act5C-GAL4 > UAS-YippeeRNAi	42	6	8	Act5C-GAL4 > UAS-YippeeRNAi_6	Act5C-GAL4 > UAS-YippeeRNAi_6_8
Act5C-GAL4 > UAS-YippeeRNAi	49	6	9	Act5C-GAL4 > UAS-YippeeRNAi_6	Act5C-GAL4 > UAS-YippeeRNAi_6_9
Act5C-GAL4 > UAS-YippeeRNAi	47	6	10	Act5C-GAL4 > UAS-YippeeRNAi_6	Act5C-GAL4 > UAS-YippeeRNAi_6_10
Act5C-GAL4 > UAS-YippeeRNAi	38	6	11	Act5C-GAL4 > UAS-YippeeRNAi_6	Act5C-GAL4 > UAS-YippeeRNAi_6_11
Act5C-GAL4 > UAS-YippeeRNAi	32	6	12	Act5C-GAL4 > UAS-YippeeRNAi_6	Act5C-GAL4 > UAS-YippeeRNAi_6_12
Act5C-GAL4 > UAS-YippeeRNAi	34	6	13	Act5C-GAL4 > UAS-YippeeRNAi_6	Act5C-GAL4 > UAS-YippeeRNAi_6_13
Act5C-GAL4 > UAS-YippeeRNAi	33	6	14	Act5C-GAL4 > UAS-YippeeRNAi_6	Act5C-GAL4 > UAS-YippeeRNAi_6_14
Act5C-GAL4 > UAS-YippeeRNAi	28	6	15	Act5C-GAL4 > UAS-YippeeRNAi_6	Act5C-GAL4 > UAS-YippeeRNAi_6_15
Act5C-GAL4 > UAS-YippeeRNAi	29	6	16	Act5C-GAL4 > UAS-YippeeRNAi_6	Act5C-GAL4 > UAS-YippeeRNAi_6_16
Act5C-GAL4 > UAS-YippeeRNAi	27	6	17	Act5C-GAL4 > UAS-YippeeRNAi_6	Act5C-GAL4 > UAS-YippeeRNAi_6_17
Act5C-GAL4 > UAS-YippeeRNAi	30	6	18	Act5C-GAL4 > UAS-YippeeRNAi_6	Act5C-GAL4 > UAS-YippeeRNAi_6_18
Act5C-GAL4 > UAS-YippeeRNAi	40	6	19	Act5C-GAL4 > UAS-YippeeRNAi_6	Act5C-GAL4 > UAS-YippeeRNAi_6_19
Act5C-GAL4 > UAS-YippeeRNAi	47	6	20	Act5C-GAL4 > UAS-YippeeRNAi_6	Act5C-GAL4 > UAS-YippeeRNAi_6_20
Act5C-GAL4 > UAS-YippeeRNAi	41	7	1	Act5C-GAL4 > UAS-YippeeRNAi_7	Act5C-GAL4 > UAS-YippeeRNAi_7_1
Act5C-GAL4 > UAS-YippeeRNAi	49	7	2	Act5C-GAL4 > UAS-YippeeRNAi_7	Act5C-GAL4 > UAS-YippeeRNAi_7_2
Act5C-GAL4 > UAS-YippeeRNAi	37	7	3	Act5C-GAL4 > UAS-YippeeRNAi_7	Act5C-GAL4 > UAS-YippeeRNAi_7_3
Act5C-GAL4 > UAS-YippeeRNAi	37	7	4	Act5C-GAL4 > UAS-YippeeRNAi_7	Act5C-GAL4 > UAS-YippeeRNAi_7_4
Act5C-GAL4 > UAS-YippeeRNAi	37	7	5	Act5C-GAL4 > UAS-YippeeRNAi_7	Act5C-GAL4 > UAS-YippeeRNAi_7_5
Act5C-GAL4 > UAS-YippeeRNAi	44	7	6	Act5C-GAL4 > UAS-YippeeRNAi_7	Act5C-GAL4 > UAS-YippeeRNAi_7_6
Act5C-GAL4 > UAS-YippeeRNAi	48	7	7	Act5C-GAL4 > UAS-YippeeRNAi_7	Act5C-GAL4 > UAS-YippeeRNAi_7_7
Act5C-GAL4 > UAS-YippeeRNAi	67	7	8	Act5C-GAL4 > UAS-YippeeRNAi_7	Act5C-GAL4 > UAS-YippeeRNAi_7_8
Act5C-GAL4 > UAS-YippeeRNAi	53	7	9	Act5C-GAL4 > UAS-YippeeRNAi_7	Act5C-GAL4 > UAS-YippeeRNAi_7_9
Act5C-GAL4 > UAS-YippeeRNAi	35	7	10	Act5C-GAL4 > UAS-YippeeRNAi_7	Act5C-GAL4 > UAS-YippeeRNAi_7_10
Act5C-GAL4 > UAS-YippeeRNAi	34	7	11	Act5C-GAL4 > UAS-YippeeRNAi_7	Act5C-GAL4 > UAS-YippeeRNAi_7_11
Act5C-GAL4 > UAS-YippeeRNAi	38	7	12	Act5C-GAL4 > UAS-YippeeRNAi_7	Act5C-GAL4 > UAS-YippeeRNAi_7_12
Act5C-GAL4 > UAS-YippeeRNAi	45	7	13	Act5C-GAL4 > UAS-YippeeRNAi_7	Act5C-GAL4 > UAS-YippeeRNAi_7_13
Act5C-GAL4 > UAS-YippeeRNAi	40	7	14	Act5C-GAL4 > UAS-YippeeRNAi_7	Act5C-GAL4 > UAS-YippeeRNAi_7_14
Act5C-GAL4 > UAS-YippeeRNAi	39	7	15	Act5C-GAL4 > UAS-YippeeRNAi_7	Act5C-GAL4 > UAS-YippeeRNAi_7_15
Act5C-GAL4 > UAS-YippeeRNAi	36	7	16	Act5C-GAL4 > UAS-YippeeRNAi_7	Act5C-GAL4 > UAS-YippeeRNAi_7_16
Act5C-GAL4 > UAS-YippeeRNAi	30	7	17	Act5C-GAL4 > UAS-YippeeRNAi_7	Act5C-GAL4 > UAS-YippeeRNAi_7_17
Act5C-GAL4 > UAS-YippeeRNAi	41	7	18	Act5C-GAL4 > UAS-YippeeRNAi_7	Act5C-GAL4 > UAS-YippeeRNAi_7_18
Act5C-GAL4 > UAS-YippeeRNAi	50	7	19	Act5C-GAL4 > UAS-YippeeRNAi_7	Act5C-GAL4 > UAS-YippeeRNAi_7_19
Act5C-GAL4 > UAS-YippeeRNAi	54	7	20	Act5C-GAL4 > UAS-YippeeRNAi_7	Act5C-GAL4 > UAS-YippeeRNAi_7_20
Act5C-GAL4 > UAS-YippeeRNAi	36	8	1	Act5C-GAL4 > UAS-YippeeRNAi_8	Act5C-GAL4 > UAS-YippeeRNAi_8_1
Act5C-GAL4 > UAS-YippeeRNAi	50	8	2	Act5C-GAL4 > UAS-YippeeRNAi_8	Act5C-GAL4 > UAS-YippeeRNAi_8_2
Act5C-GAL4 > UAS-YippeeRNAi	52	8	3	Act5C-GAL4 > UAS-YippeeRNAi_8	Act5C-GAL4 > UAS-YippeeRNAi_8_3
Act5C-GAL4 > UAS-YippeeRNAi	45	8	4	Act5C-GAL4 > UAS-YippeeRNAi_8	Act5C-GAL4 > UAS-YippeeRNAi_8_4
Act5C-GAL4 > UAS-YippeeRNAi	51	8	5	Act5C-GAL4 > UAS-YippeeRNAi_8	Act5C-GAL4 > UAS-YippeeRNAi_8_5
Act5C-GAL4 > UAS-YippeeRNAi	50	8	6	Act5C-GAL4 > UAS-YippeeRNAi_8	Act5C-GAL4 > UAS-YippeeRNAi_8_6
Act5C-GAL4 > UAS-YippeeRNAi	52	8	7	Act5C-GAL4 > UAS-YippeeRNAi_8	Act5C-GAL4 > UAS-YippeeRNAi_8_7
Act5C-GAL4 > UAS-YippeeRNAi	40	8	8	Act5C-GAL4 > UAS-YippeeRNAi_8	Act5C-GAL4 > UAS-YippeeRNAi_8_8
Act5C-GAL4 > UAS-YippeeRNAi	47	8	9	Act5C-GAL4 > UAS-YippeeRNAi_8	Act5C-GAL4 > UAS-YippeeRNAi_8_9
Act5C-GAL4 > UAS-YippeeRNAi	55	8	10	Act5C-GAL4 > UAS-YippeeRNAi_8	Act5C-GAL4 > UAS-YippeeRNAi_8_10
Act5C-GAL4 > UAS-YippeeRNAi	47	8	11	Act5C-GAL4 > UAS-YippeeRNAi_8	Act5C-GAL4 > UAS-YippeeRNAi_8_11
Act5C-GAL4 > UAS-YippeeRNAi	33	8	12	Act5C-GAL4 > UAS-YippeeRNAi_8	Act5C-GAL4 > UAS-YippeeRNAi_8_12
Act5C-GAL4 > UAS-YippeeRNAi	33	8	13	Act5C-GAL4 > UAS-YippeeRNAi_8	Act5C-GAL4 > UAS-YippeeRNAi_8_13
Act5C-GAL4 > UAS-YippeeRNAi	43	8	14	Act5C-GAL4 > UAS-YippeeRNAi_8	Act5C-GAL4 > UAS-YippeeRNAi_8_14
Act5C-GAL4 > UAS-YippeeRNAi	41	8	15	Act5C-GAL4 > UAS-YippeeRNAi_8	Act5C-GAL4 > UAS-YippeeRNAi_8_15
Act5C-GAL4 > UAS-YippeeRNAi	43	8	16	Act5C-GAL4 > UAS-YippeeRNAi_8	Act5C-GAL4 > UAS-YippeeRNAi_8_16
Act5C-GAL4 > UAS-YippeeRNAi	43	8	17	Act5C-GAL4 > UAS-YippeeRNAi_8	Act5C-GAL4 > UAS-YippeeRNAi_8_17
Act5C-GAL4 > UAS-YippeeRNAi	46	8	18	Act5C-GAL4 > UAS-YippeeRNAi_8	Act5C-GAL4 > UAS-YippeeRNAi_8_18
Act5C-GAL4 > UAS-YippeeRNAi	47	8	19	Act5C-GAL4 > UAS-YippeeRNAi_8	Act5C-GAL4 > UAS-YippeeRNAi_8_19
Act5C-GAL4 > UAS-YippeeRNAi	39	8	20	Act5C-GAL4 > UAS-YippeeRNAi_8	Act5C-GAL4 > UAS-YippeeRNAi_8_20
Act5C-GAL4 > UAS-YippeeRNAi	54	9	1	Act5C-GAL4 > UAS-YippeeRNAi_9	Act5C-GAL4 > UAS-YippeeRNAi_9_1
Act5C-GAL4 > UAS-YippeeRNAi	45	9	2	Act5C-GAL4 > UAS-YippeeRNAi_9	Act5C-GAL4 > UAS-YippeeRNAi_9_2
Act5C-GAL4 > UAS-YippeeRNAi	38	9	3	Act5C-GAL4 > UAS-YippeeRNAi_9	Act5C-GAL4 > UAS-YippeeRNAi_9_3
Act5C-GAL4 > UAS-YippeeRNAi	43	9	4	Act5C-GAL4 > UAS-YippeeRNAi_9	Act5C-GAL4 > UAS-YippeeRNAi_9_4
Act5C-GAL4 > UAS-YippeeRNAi	52	9	5	Act5C-GAL4 > UAS-YippeeRNAi_9	Act5C-GAL4 > UAS-YippeeRNAi_9_5
Act5C-GAL4 > UAS-YippeeRNAi	36	9	6	Act5C-GAL4 > UAS-YippeeRNAi_9	Act5C-GAL4 > UAS-YippeeRNAi_9_6
Act5C-GAL4 > UAS-YippeeRNAi	46	9	7	Act5C-GAL4 > UAS-YippeeRNAi_9	Act5C-GAL4 > UAS-YippeeRNAi_9_7
Act5C-GAL4 > UAS-YippeeRNAi	43	9	8	Act5C-GAL4 > UAS-YippeeRNAi_9	Act5C-GAL4 > UAS-YippeeRNAi_9_8
Act5C-GAL4 > UAS-YippeeRNAi	43	9	9	Act5C-GAL4 > UAS-YippeeRNAi_9	Act5C-GAL4 > UAS-YippeeRNAi_9_9
Act5C-GAL4 > UAS-YippeeRNAi	42	9	10	Act5C-GAL4 > UAS-YippeeRNAi_9	Act5C-GAL4 > UAS-YippeeRNAi_9_10
Act5C-GAL4 > UAS-YippeeRNAi	32	9	11	Act5C-GAL4 > UAS-YippeeRNAi_9	Act5C-GAL4 > UAS-YippeeRNAi_9_11
Act5C-GAL4 > UAS-YippeeRNAi	43	9	12	Act5C-GAL4 > UAS-YippeeRNAi_9	Act5C-GAL4 > UAS-YippeeRNAi_9_12
Act5C-GAL4 > UAS-YippeeRNAi	44	9	13	Act5C-GAL4 > UAS-YippeeRNAi_9	Act5C-GAL4 > UAS-YippeeRNAi_9_13
Act5C-GAL4 > UAS-YippeeRNAi	48	9	14	Act5C-GAL4 > UAS-YippeeRNAi_9	Act5C-GAL4 > UAS-YippeeRNAi_9_14
Act5C-GAL4 > UAS-YippeeRNAi	40	9	15	Act5C-GAL4 > UAS-YippeeRNAi_9	Act5C-GAL4 > UAS-YippeeRNAi_9_15
Act5C-GAL4 > UAS-YippeeRNAi	38	9	16	Act5C-GAL4 > UAS-YippeeRNAi_9	Act5C-GAL4 > UAS-YippeeRNAi_9_16
Act5C-GAL4 > UAS-YippeeRNAi	49	9	17	Act5C-GAL4 > UAS-YippeeRNAi_9	Act5C-GAL4 > UAS-YippeeRNAi_9_17
Act5C-GAL4 > UAS-YippeeRNAi	50	9	18	Act5C-GAL4 > UAS-YippeeRNAi_9	Act5C-GAL4 > UAS-YippeeRNAi_9_18
Act5C-GAL4 > UAS-YippeeRNAi	39	9	19	Act5C-GAL4 > UAS-YippeeRNAi_9	Act5C-GAL4 > UAS-YippeeRNAi_9_19
Act5C-GAL4 > UAS-YippeeRNAi	27	9	20	Act5C-GAL4 > UAS-YippeeRNAi_9	Act5C-GAL4 > UAS-YippeeRNAi_9_20
Act5C-GAL4 > UAS-YippeeRNAi	38	10	1	Act5C-GAL4 > UAS-YippeeRNAi_10	Act5C-GAL4 > UAS-YippeeRNAi_10_1
Act5C-GAL4 > UAS-YippeeRNAi	27	10	2	Act5C-GAL4 > UAS-YippeeRNAi_10	Act5C-GAL4 > UAS-YippeeRNAi_10_2
Act5C-GAL4 > UAS-YippeeRNAi	36	10	3	Act5C-GAL4 > UAS-YippeeRNAi_10	Act5C-GAL4 > UAS-YippeeRNAi_10_3
Act5C-GAL4 > UAS-YippeeRNAi	49	10	4	Act5C-GAL4 > UAS-YippeeRNAi_10	Act5C-GAL4 > UAS-YippeeRNAi_10_4
Act5C-GAL4 > UAS-YippeeRNAi	39	10	5	Act5C-GAL4 > UAS-YippeeRNAi_10	Act5C-GAL4 > UAS-YippeeRNAi_10_5
Act5C-GAL4 > UAS-YippeeRNAi	48	10	6	Act5C-GAL4 > UAS-YippeeRNAi_10	Act5C-GAL4 > UAS-YippeeRNAi_10_6
Act5C-GAL4 > UAS-YippeeRNAi	57	10	7	Act5C-GAL4 > UAS-YippeeRNAi_10	Act5C-GAL4 > UAS-YippeeRNAi_10_7
Act5C-GAL4 > UAS-YippeeRNAi	62	10	8	Act5C-GAL4 > UAS-YippeeRNAi_10	Act5C-GAL4 > UAS-YippeeRNAi_10_8
Act5C-GAL4 > UAS-YippeeRNAi	46	10	9	Act5C-GAL4 > UAS-YippeeRNAi_10	Act5C-GAL4 > UAS-YippeeRNAi_10_9
Act5C-GAL4 > UAS-YippeeRNAi	49	10	10	Act5C-GAL4 > UAS-YippeeRNAi_10	Act5C-GAL4 > UAS-YippeeRNAi_10_10
Act5C-GAL4 > UAS-YippeeRNAi	40	10	11	Act5C-GAL4 > UAS-YippeeRNAi_10	Act5C-GAL4 > UAS-YippeeRNAi_10_11
Act5C-GAL4 > UAS-YippeeRNAi	44	10	12	Act5C-GAL4 > UAS-YippeeRNAi_10	Act5C-GAL4 > UAS-YippeeRNAi_10_12
Act5C-GAL4 > UAS-YippeeRNAi	31	10	13	Act5C-GAL4 > UAS-YippeeRNAi_10	Act5C-GAL4 > UAS-YippeeRNAi_10_13
Act5C-GAL4 > UAS-YippeeRNAi	36	10	14	Act5C-GAL4 > UAS-YippeeRNAi_10	Act5C-GAL4 > UAS-YippeeRNAi_10_14
Act5C-GAL4 > UAS-YippeeRNAi	28	10	15	Act5C-GAL4 > UAS-YippeeRNAi_10	Act5C-GAL4 > UAS-YippeeRNAi_10_15
Act5C-GAL4 > UAS-YippeeRNAi	35	10	16	Act5C-GAL4 > UAS-YippeeRNAi_10	Act5C-GAL4 > UAS-YippeeRNAi_10_16
Act5C-GAL4 > UAS-YippeeRNAi	35	10	17	Act5C-GAL4 > UAS-YippeeRNAi_10	Act5C-GAL4 > UAS-YippeeRNAi_10_17
Act5C-GAL4 > UAS-YippeeRNAi	53	10	18	Act5C-GAL4 > UAS-YippeeRNAi_10	Act5C-GAL4 > UAS-YippeeRNAi_10_18
Act5C-GAL4 > UAS-YippeeRNAi	63	10	19	Act5C-GAL4 > UAS-YippeeRNAi_10	Act5C-GAL4 > UAS-YippeeRNAi_10_19
Act5C-GAL4 > UAS-YippeeRNAi	65	10	20	Act5C-GAL4 > UAS-YippeeRNAi_10	Act5C-GAL4 > UAS-YippeeRNAi_10_20
Act5C-GAL4 > UAS-YippeeRNAi	37	11	1	Act5C-GAL4 > UAS-YippeeRNAi_11	Act5C-GAL4 > UAS-YippeeRNAi_11_1
Act5C-GAL4 > UAS-YippeeRNAi	42	11	2	Act5C-GAL4 > UAS-YippeeRNAi_11	Act5C-GAL4 > UAS-YippeeRNAi_11_2
Act5C-GAL4 > UAS-YippeeRNAi	40	11	3	Act5C-GAL4 > UAS-YippeeRNAi_11	Act5C-GAL4 > UAS-YippeeRNAi_11_3
Act5C-GAL4 > UAS-YippeeRNAi	44	11	4	Act5C-GAL4 > UAS-YippeeRNAi_11	Act5C-GAL4 > UAS-YippeeRNAi_11_4
Act5C-GAL4 > UAS-YippeeRNAi	48	11	5	Act5C-GAL4 > UAS-YippeeRNAi_11	Act5C-GAL4 > UAS-YippeeRNAi_11_5
Act5C-GAL4 > UAS-YippeeRNAi	49	11	6	Act5C-GAL4 > UAS-YippeeRNAi_11	Act5C-GAL4 > UAS-YippeeRNAi_11_6
Act5C-GAL4 > UAS-YippeeRNAi	34	11	7	Act5C-GAL4 > UAS-YippeeRNAi_11	Act5C-GAL4 > UAS-YippeeRNAi_11_7
Act5C-GAL4 > UAS-YippeeRNAi	45	11	8	Act5C-GAL4 > UAS-YippeeRNAi_11	Act5C-GAL4 > UAS-YippeeRNAi_11_8
Act5C-GAL4 > UAS-YippeeRNAi	48	11	9	Act5C-GAL4 > UAS-YippeeRNAi_11	Act5C-GAL4 > UAS-YippeeRNAi_11_9
Act5C-GAL4 > UAS-YippeeRNAi	41	11	10	Act5C-GAL4 > UAS-YippeeRNAi_11	Act5C-GAL4 > UAS-YippeeRNAi_11_10
Act5C-GAL4 > UAS-YippeeRNAi	36	11	11	Act5C-GAL4 > UAS-YippeeRNAi_11	Act5C-GAL4 > UAS-YippeeRNAi_11_11
Act5C-GAL4 > UAS-YippeeRNAi	37	11	12	Act5C-GAL4 > UAS-YippeeRNAi_11	Act5C-GAL4 > UAS-YippeeRNAi_11_12
Act5C-GAL4 > UAS-YippeeRNAi	43	11	13	Act5C-GAL4 > UAS-YippeeRNAi_11	Act5C-GAL4 > UAS-YippeeRNAi_11_13
Act5C-GAL4 > UAS-YippeeRNAi	30	11	14	Act5C-GAL4 > UAS-YippeeRNAi_11	Act5C-GAL4 > UAS-YippeeRNAi_11_14
Act5C-GAL4 > UAS-YippeeRNAi	37	11	15	Act5C-GAL4 > UAS-YippeeRNAi_11	Act5C-GAL4 > UAS-YippeeRNAi_11_15
Act5C-GAL4 > UAS-YippeeRNAi	26	11	16	Act5C-GAL4 > UAS-YippeeRNAi_11	Act5C-GAL4 > UAS-YippeeRNAi_11_16
Act5C-GAL4 > UAS-YippeeRNAi	26	11	17	Act5C-GAL4 > UAS-YippeeRNAi_11	Act5C-GAL4 > UAS-YippeeRNAi_11_17
Act5C-GAL4 > UAS-YippeeRNAi	32	11	18	Act5C-GAL4 > UAS-YippeeRNAi_11	Act5C-GAL4 > UAS-YippeeRNAi_11_18
Act5C-GAL4 > UAS-YippeeRNAi	40	11	19	Act5C-GAL4 > UAS-YippeeRNAi_11	Act5C-GAL4 > UAS-YippeeRNAi_11_19
Act5C-GAL4 > UAS-YippeeRNAi	38	11	20	Act5C-GAL4 > UAS-YippeeRNAi_11	Act5C-GAL4 > UAS-YippeeRNAi_11_20
Act5C-GAL4 > UAS-YippeeRNAi	50	12	1	Act5C-GAL4 > UAS-YippeeRNAi_12	Act5C-GAL4 > UAS-YippeeRNAi_12_1
Act5C-GAL4 > UAS-YippeeRNAi	45	12	2	Act5C-GAL4 > UAS-YippeeRNAi_12	Act5C-GAL4 > UAS-YippeeRNAi_12_2
Act5C-GAL4 > UAS-YippeeRNAi	50	12	3	Act5C-GAL4 > UAS-YippeeRNAi_12	Act5C-GAL4 > UAS-YippeeRNAi_12_3
Act5C-GAL4 > UAS-YippeeRNAi	48	12	4	Act5C-GAL4 > UAS-YippeeRNAi_12	Act5C-GAL4 > UAS-YippeeRNAi_12_4
Act5C-GAL4 > UAS-YippeeRNAi	33	12	5	Act5C-GAL4 > UAS-YippeeRNAi_12	Act5C-GAL4 > UAS-YippeeRNAi_12_5
Act5C-GAL4 > UAS-YippeeRNAi	35	12	6	Act5C-GAL4 > UAS-YippeeRNAi_12	Act5C-GAL4 > UAS-YippeeRNAi_12_6
Act5C-GAL4 > UAS-YippeeRNAi	51	12	7	Act5C-GAL4 > UAS-YippeeRNAi_12	Act5C-GAL4 > UAS-YippeeRNAi_12_7
Act5C-GAL4 > UAS-YippeeRNAi	65	12	8	Act5C-GAL4 > UAS-YippeeRNAi_12	Act5C-GAL4 > UAS-YippeeRNAi_12_8
Act5C-GAL4 > UAS-YippeeRNAi	71	12	9	Act5C-GAL4 > UAS-YippeeRNAi_12	Act5C-GAL4 > UAS-YippeeRNAi_12_9
Act5C-GAL4 > UAS-YippeeRNAi	41	12	10	Act5C-GAL4 > UAS-YippeeRNAi_12	Act5C-GAL4 > UAS-YippeeRNAi_12_10
Act5C-GAL4 > UAS-YippeeRNAi	34	12	11	Act5C-GAL4 > UAS-YippeeRNAi_12	Act5C-GAL4 > UAS-YippeeRNAi_12_11
Act5C-GAL4 > UAS-YippeeRNAi	36	12	12	Act5C-GAL4 > UAS-YippeeRNAi_12	Act5C-GAL4 > UAS-YippeeRNAi_12_12
Act5C-GAL4 > UAS-YippeeRNAi	34	12	13	Act5C-GAL4 > UAS-YippeeRNAi_12	Act5C-GAL4 > UAS-YippeeRNAi_12_13
Act5C-GAL4 > UAS-YippeeRNAi	37	12	14	Act5C-GAL4 > UAS-YippeeRNAi_12	Act5C-GAL4 > UAS-YippeeRNAi_12_14
Act5C-GAL4 > UAS-YippeeRNAi	43	12	15	Act5C-GAL4 > UAS-YippeeRNAi_12	Act5C-GAL4 > UAS-YippeeRNAi_12_15
Act5C-GAL4 > UAS-YippeeRNAi	39	12	16	Act5C-GAL4 > UAS-YippeeRNAi_12	Act5C-GAL4 > UAS-YippeeRNAi_12_16
Act5C-GAL4 > UAS-YippeeRNAi	31	12	17	Act5C-GAL4 > UAS-YippeeRNAi_12	Act5C-GAL4 > UAS-YippeeRNAi_12_17
Act5C-GAL4 > UAS-YippeeRNAi	29	12	18	Act5C-GAL4 > UAS-YippeeRNAi_12	Act5C-GAL4 > UAS-YippeeRNAi_12_18
Act5C-GAL4 > UAS-YippeeRNAi	32	12	19	Act5C-GAL4 > UAS-YippeeRNAi_12	Act5C-GAL4 > UAS-YippeeRNAi_12_19
Act5C-GAL4 > UAS-YippeeRNAi	32	12	20	Act5C-GAL4 > UAS-YippeeRNAi_12	Act5C-GAL4 > UAS-YippeeRNAi_12_20
Act5C-GAL4 > UAS-YippeeRNAi	26	13	1	Act5C-GAL4 > UAS-YippeeRNAi_13	Act5C-GAL4 > UAS-YippeeRNAi_13_1
Act5C-GAL4 > UAS-YippeeRNAi	34	13	2	Act5C-GAL4 > UAS-YippeeRNAi_13	Act5C-GAL4 > UAS-YippeeRNAi_13_2
Act5C-GAL4 > UAS-YippeeRNAi	30	13	3	Act5C-GAL4 > UAS-YippeeRNAi_13	Act5C-GAL4 > UAS-YippeeRNAi_13_3
Act5C-GAL4 > UAS-YippeeRNAi	34	13	4	Act5C-GAL4 > UAS-YippeeRNAi_13	Act5C-GAL4 > UAS-YippeeRNAi_13_4
Act5C-GAL4 > UAS-YippeeRNAi	48	13	5	Act5C-GAL4 > UAS-YippeeRNAi_13	Act5C-GAL4 > UAS-YippeeRNAi_13_5
Act5C-GAL4 > UAS-YippeeRNAi	49	13	6	Act5C-GAL4 > UAS-YippeeRNAi_13	Act5C-GAL4 > UAS-YippeeRNAi_13_6
Act5C-GAL4 > UAS-YippeeRNAi	67	13	7	Act5C-GAL4 > UAS-YippeeRNAi_13	Act5C-GAL4 > UAS-YippeeRNAi_13_7
Act5C-GAL4 > UAS-YippeeRNAi	72	13	8	Act5C-GAL4 > UAS-YippeeRNAi_13	Act5C-GAL4 > UAS-YippeeRNAi_13_8
Act5C-GAL4 > UAS-YippeeRNAi	60	13	9	Act5C-GAL4 > UAS-YippeeRNAi_13	Act5C-GAL4 > UAS-YippeeRNAi_13_9
Act5C-GAL4 > UAS-YippeeRNAi	41	13	10	Act5C-GAL4 > UAS-YippeeRNAi_13	Act5C-GAL4 > UAS-YippeeRNAi_13_10
Act5C-GAL4 > UAS-YippeeRNAi	33	13	11	Act5C-GAL4 > UAS-YippeeRNAi_13	Act5C-GAL4 > UAS-YippeeRNAi_13_11
Act5C-GAL4 > UAS-YippeeRNAi	31	13	12	Act5C-GAL4 > UAS-YippeeRNAi_13	Act5C-GAL4 > UAS-YippeeRNAi_13_12
Act5C-GAL4 > UAS-YippeeRNAi	36	13	13	Act5C-GAL4 > UAS-YippeeRNAi_13	Act5C-GAL4 > UAS-YippeeRNAi_13_13
Act5C-GAL4 > UAS-YippeeRNAi	26	13	14	Act5C-GAL4 > UAS-YippeeRNAi_13	Act5C-GAL4 > UAS-YippeeRNAi_13_14
Act5C-GAL4 > UAS-YippeeRNAi	29	13	15	Act5C-GAL4 > UAS-YippeeRNAi_13	Act5C-GAL4 > UAS-YippeeRNAi_13_15
Act5C-GAL4 > UAS-YippeeRNAi	26	13	16	Act5C-GAL4 > UAS-YippeeRNAi_13	Act5C-GAL4 > UAS-YippeeRNAi_13_16
Act5C-GAL4 > UAS-YippeeRNAi	28	13	17	Act5C-GAL4 > UAS-YippeeRNAi_13	Act5C-GAL4 > UAS-YippeeRNAi_13_17
Act5C-GAL4 > UAS-YippeeRNAi	37	13	18	Act5C-GAL4 > UAS-YippeeRNAi_13	Act5C-GAL4 > UAS-YippeeRNAi_13_18
Act5C-GAL4 > UAS-YippeeRNAi	37	13	19	Act5C-GAL4 > UAS-YippeeRNAi_13	Act5C-GAL4 > UAS-YippeeRNAi_13_19
Act5C-GAL4 > UAS-YippeeRNAi	40	13	20	Act5C-GAL4 > UAS-YippeeRNAi_13	Act5C-GAL4 > UAS-YippeeRNAi_13_20
Act5C-GAL4 > UAS-YippeeRNAi	26	14	1	Act5C-GAL4 > UAS-YippeeRNAi_14	Act5C-GAL4 > UAS-YippeeRNAi_14_1
Act5C-GAL4 > UAS-YippeeRNAi	36	14	2	Act5C-GAL4 > UAS-YippeeRNAi_14	Act5C-GAL4 > UAS-YippeeRNAi_14_2
Act5C-GAL4 > UAS-YippeeRNAi	30	14	3	Act5C-GAL4 > UAS-YippeeRNAi_14	Act5C-GAL4 > UAS-YippeeRNAi_14_3
Act5C-GAL4 > UAS-YippeeRNAi	42	14	4	Act5C-GAL4 > UAS-YippeeRNAi_14	Act5C-GAL4 > UAS-YippeeRNAi_14_4
Act5C-GAL4 > UAS-YippeeRNAi	31	14	5	Act5C-GAL4 > UAS-YippeeRNAi_14	Act5C-GAL4 > UAS-YippeeRNAi_14_5
Act5C-GAL4 > UAS-YippeeRNAi	27	14	6	Act5C-GAL4 > UAS-YippeeRNAi_14	Act5C-GAL4 > UAS-YippeeRNAi_14_6
Act5C-GAL4 > UAS-YippeeRNAi	40	14	7	Act5C-GAL4 > UAS-YippeeRNAi_14	Act5C-GAL4 > UAS-YippeeRNAi_14_7
Act5C-GAL4 > UAS-YippeeRNAi	31	14	8	Act5C-GAL4 > UAS-YippeeRNAi_14	Act5C-GAL4 > UAS-YippeeRNAi_14_8
Act5C-GAL4 > UAS-YippeeRNAi	30	14	9	Act5C-GAL4 > UAS-YippeeRNAi_14	Act5C-GAL4 > UAS-YippeeRNAi_14_9
Act5C-GAL4 > UAS-YippeeRNAi	31	14	10	Act5C-GAL4 > UAS-YippeeRNAi_14	Act5C-GAL4 > UAS-YippeeRNAi_14_10
Act5C-GAL4 > UAS-YippeeRNAi	32	14	11	Act5C-GAL4 > UAS-YippeeRNAi_14	Act5C-GAL4 > UAS-YippeeRNAi_14_11
Act5C-GAL4 > UAS-YippeeRNAi	32	14	12	Act5C-GAL4 > UAS-YippeeRNAi_14	Act5C-GAL4 > UAS-YippeeRNAi_14_12
Act5C-GAL4 > UAS-YippeeRNAi	41	14	13	Act5C-GAL4 > UAS-YippeeRNAi_14	Act5C-GAL4 > UAS-YippeeRNAi_14_13
Act5C-GAL4 > UAS-YippeeRNAi	32	14	14	Act5C-GAL4 > UAS-YippeeRNAi_14	Act5C-GAL4 > UAS-YippeeRNAi_14_14
Act5C-GAL4 > UAS-YippeeRNAi	36	14	15	Act5C-GAL4 > UAS-YippeeRNAi_14	Act5C-GAL4 > UAS-YippeeRNAi_14_15
Act5C-GAL4 > UAS-YippeeRNAi	36	14	16	Act5C-GAL4 > UAS-YippeeRNAi_14	Act5C-GAL4 > UAS-YippeeRNAi_14_16
Act5C-GAL4 > UAS-YippeeRNAi	35	14	17	Act5C-GAL4 > UAS-YippeeRNAi_14	Act5C-GAL4 > UAS-YippeeRNAi_14_17
Act5C-GAL4 > UAS-YippeeRNAi	32	14	18	Act5C-GAL4 > UAS-YippeeRNAi_14	Act5C-GAL4 > UAS-YippeeRNAi_14_18
Act5C-GAL4 > UAS-YippeeRNAi	42	14	19	Act5C-GAL4 > UAS-YippeeRNAi_14	Act5C-GAL4 > UAS-YippeeRNAi_14_19
Act5C-GAL4 > UAS-YippeeRNAi	31	14	20	Act5C-GAL4 > UAS-YippeeRNAi_14	Act5C-GAL4 > UAS-YippeeRNAi_14_20
Act5C-GAL4 > UAS-YippeeRNAi	24	15	1	Act5C-GAL4 > UAS-YippeeRNAi_15	Act5C-GAL4 > UAS-YippeeRNAi_15_1
Act5C-GAL4 > UAS-YippeeRNAi	36	15	2	Act5C-GAL4 > UAS-YippeeRNAi_15	Act5C-GAL4 > UAS-YippeeRNAi_15_2
Act5C-GAL4 > UAS-YippeeRNAi	37	15	3	Act5C-GAL4 > UAS-YippeeRNAi_15	Act5C-GAL4 > UAS-YippeeRNAi_15_3
Act5C-GAL4 > UAS-YippeeRNAi	38	15	4	Act5C-GAL4 > UAS-YippeeRNAi_15	Act5C-GAL4 > UAS-YippeeRNAi_15_4
Act5C-GAL4 > UAS-YippeeRNAi	46	15	5	Act5C-GAL4 > UAS-YippeeRNAi_15	Act5C-GAL4 > UAS-YippeeRNAi_15_5
Act5C-GAL4 > UAS-YippeeRNAi	46	15	6	Act5C-GAL4 > UAS-YippeeRNAi_15	Act5C-GAL4 > UAS-YippeeRNAi_15_6
Act5C-GAL4 > UAS-YippeeRNAi	69	15	7	Act5C-GAL4 > UAS-YippeeRNAi_15	Act5C-GAL4 > UAS-YippeeRNAi_15_7
Act5C-GAL4 > UAS-YippeeRNAi	58	15	8	Act5C-GAL4 > UAS-YippeeRNAi_15	Act5C-GAL4 > UAS-YippeeRNAi_15_8
Act5C-GAL4 > UAS-YippeeRNAi	35	15	9	Act5C-GAL4 > UAS-YippeeRNAi_15	Act5C-GAL4 > UAS-YippeeRNAi_15_9
Act5C-GAL4 > UAS-YippeeRNAi	31	15	10	Act5C-GAL4 > UAS-YippeeRNAi_15	Act5C-GAL4 > UAS-YippeeRNAi_15_10
Act5C-GAL4 > UAS-YippeeRNAi	31	15	11	Act5C-GAL4 > UAS-YippeeRNAi_15	Act5C-GAL4 > UAS-YippeeRNAi_15_11
Act5C-GAL4 > UAS-YippeeRNAi	20	15	12	Act5C-GAL4 > UAS-YippeeRNAi_15	Act5C-GAL4 > UAS-YippeeRNAi_15_12
Act5C-GAL4 > UAS-YippeeRNAi	20	15	13	Act5C-GAL4 > UAS-YippeeRNAi_15	Act5C-GAL4 > UAS-YippeeRNAi_15_13
Act5C-GAL4 > UAS-YippeeRNAi	25	15	14	Act5C-GAL4 > UAS-YippeeRNAi_15	Act5C-GAL4 > UAS-YippeeRNAi_15_14
Act5C-GAL4 > UAS-YippeeRNAi	31	15	15	Act5C-GAL4 > UAS-YippeeRNAi_15	Act5C-GAL4 > UAS-YippeeRNAi_15_15
Act5C-GAL4 > UAS-YippeeRNAi	21	15	16	Act5C-GAL4 > UAS-YippeeRNAi_15	Act5C-GAL4 > UAS-YippeeRNAi_15_16
Act5C-GAL4 > UAS-YippeeRNAi	26	15	17	Act5C-GAL4 > UAS-YippeeRNAi_15	Act5C-GAL4 > UAS-YippeeRNAi_15_17
Act5C-GAL4 > UAS-YippeeRNAi	34	15	18	Act5C-GAL4 > UAS-YippeeRNAi_15	Act5C-GAL4 > UAS-YippeeRNAi_15_18
Act5C-GAL4 > UAS-YippeeRNAi	33	15	19	Act5C-GAL4 > UAS-YippeeRNAi_15	Act5C-GAL4 > UAS-YippeeRNAi_15_19
Act5C-GAL4 > UAS-YippeeRNAi	51	15	20	Act5C-GAL4 > UAS-YippeeRNAi_15	Act5C-GAL4 > UAS-YippeeRNAi_15_20
pnr-GAL4	104	1	1	pnr-GAL4_1	pnr-GAL4_1_1
pnr-GAL4	98	1	2	pnr-GAL4_1	pnr-GAL4_1_2
pnr-GAL4	105	1	3	pnr-GAL4_1	pnr-GAL4_1_3
pnr-GAL4	82	1	4	pnr-GAL4_1	pnr-GAL4_1_4
pnr-GAL4	97	1	5	pnr-GAL4_1	pnr-GAL4_1_5
pnr-GAL4	121	1	6	pnr-GAL4_1	pnr-GAL4_1_6
pnr-GAL4	104	1	7	pnr-GAL4_1	pnr-GAL4_1_7
pnr-GAL4	95	1	8	pnr-GAL4_1	pnr-GAL4_1_8
pnr-GAL4	98	1	9	pnr-GAL4_1	pnr-GAL4_1_9
pnr-GAL4	100	1	10	pnr-GAL4_1	pnr-GAL4_1_10
pnr-GAL4	100	1	11	pnr-GAL4_1	pnr-GAL4_1_11
pnr-GAL4	91	1	12	pnr-GAL4_1	pnr-GAL4_1_12
pnr-GAL4	106	1	13	pnr-GAL4_1	pnr-GAL4_1_13
pnr-GAL4	100	1	14	pnr-GAL4_1	pnr-GAL4_1_14
pnr-GAL4	91	1	15	pnr-GAL4_1	pnr-GAL4_1_15
pnr-GAL4	76	1	16	pnr-GAL4_1	pnr-GAL4_1_16
pnr-GAL4	85	1	17	pnr-GAL4_1	pnr-GAL4_1_17
pnr-GAL4	69	1	18	pnr-GAL4_1	pnr-GAL4_1_18
pnr-GAL4	92	1	19	pnr-GAL4_1	pnr-GAL4_1_19
pnr-GAL4	106	1	20	pnr-GAL4_1	pnr-GAL4_1_20
pnr-GAL4	75	2	1	pnr-GAL4_2	pnr-GAL4_2_1
pnr-GAL4	88	2	2	pnr-GAL4_2	pnr-GAL4_2_2
pnr-GAL4	77	2	3	pnr-GAL4_2	pnr-GAL4_2_3
pnr-GAL4	87	2	4	pnr-GAL4_2	pnr-GAL4_2_4
pnr-GAL4	96	2	5	pnr-GAL4_2	pnr-GAL4_2_5
pnr-GAL4	94	2	6	pnr-GAL4_2	pnr-GAL4_2_6
pnr-GAL4	104	2	7	pnr-GAL4_2	pnr-GAL4_2_7
pnr-GAL4	99	2	8	pnr-GAL4_2	pnr-GAL4_2_8
pnr-GAL4	99	2	9	pnr-GAL4_2	pnr-GAL4_2_9
pnr-GAL4	87	2	10	pnr-GAL4_2	pnr-GAL4_2_10
pnr-GAL4	80	2	11	pnr-GAL4_2	pnr-GAL4_2_11
pnr-GAL4	83	2	12	pnr-GAL4_2	pnr-GAL4_2_12
pnr-GAL4	84	2	13	pnr-GAL4_2	pnr-GAL4_2_13
pnr-GAL4	75	2	14	pnr-GAL4_2	pnr-GAL4_2_14
pnr-GAL4	84	2	15	pnr-GAL4_2	pnr-GAL4_2_15
pnr-GAL4	68	2	16	pnr-GAL4_2	pnr-GAL4_2_16
pnr-GAL4	77	2	17	pnr-GAL4_2	pnr-GAL4_2_17
pnr-GAL4	77	2	18	pnr-GAL4_2	pnr-GAL4_2_18
pnr-GAL4	88	2	19	pnr-GAL4_2	pnr-GAL4_2_19
pnr-GAL4	83	2	20	pnr-GAL4_2	pnr-GAL4_2_20
pnr-GAL4	60	3	1	pnr-GAL4_3	pnr-GAL4_3_1
pnr-GAL4	71	3	2	pnr-GAL4_3	pnr-GAL4_3_2
pnr-GAL4	83	3	3	pnr-GAL4_3	pnr-GAL4_3_3
pnr-GAL4	95	3	4	pnr-GAL4_3	pnr-GAL4_3_4
pnr-GAL4	84	3	5	pnr-GAL4_3	pnr-GAL4_3_5
pnr-GAL4	86	3	6	pnr-GAL4_3	pnr-GAL4_3_6
pnr-GAL4	81	3	7	pnr-GAL4_3	pnr-GAL4_3_7
pnr-GAL4	82	3	8	pnr-GAL4_3	pnr-GAL4_3_8
pnr-GAL4	73	3	9	pnr-GAL4_3	pnr-GAL4_3_9
pnr-GAL4	77	3	10	pnr-GAL4_3	pnr-GAL4_3_10
pnr-GAL4	84	3	11	pnr-GAL4_3	pnr-GAL4_3_11
pnr-GAL4	70	3	12	pnr-GAL4_3	pnr-GAL4_3_12
pnr-GAL4	81	3	13	pnr-GAL4_3	pnr-GAL4_3_13
pnr-GAL4	79	3	14	pnr-GAL4_3	pnr-GAL4_3_14
pnr-GAL4	89	3	15	pnr-GAL4_3	pnr-GAL4_3_15
pnr-GAL4	77	3	16	pnr-GAL4_3	pnr-GAL4_3_16
pnr-GAL4	64	3	17	pnr-GAL4_3	pnr-GAL4_3_17
pnr-GAL4	80	3	18	pnr-GAL4_3	pnr-GAL4_3_18
pnr-GAL4	85	3	19	pnr-GAL4_3	pnr-GAL4_3_19
pnr-GAL4	82	3	20	pnr-GAL4_3	pnr-GAL4_3_20
pnr-GAL4	81	4	1	pnr-GAL4_4	pnr-GAL4_4_1
pnr-GAL4	74	4	2	pnr-GAL4_4	pnr-GAL4_4_2
pnr-GAL4	83	4	3	pnr-GAL4_4	pnr-GAL4_4_3
pnr-GAL4	79	4	4	pnr-GAL4_4	pnr-GAL4_4_4
pnr-GAL4	87	4	5	pnr-GAL4_4	pnr-GAL4_4_5
pnr-GAL4	80	4	6	pnr-GAL4_4	pnr-GAL4_4_6
pnr-GAL4	92	4	7	pnr-GAL4_4	pnr-GAL4_4_7
pnr-GAL4	72	4	8	pnr-GAL4_4	pnr-GAL4_4_8
pnr-GAL4	83	4	9	pnr-GAL4_4	pnr-GAL4_4_9
pnr-GAL4	87	4	10	pnr-GAL4_4	pnr-GAL4_4_10
pnr-GAL4	84	4	11	pnr-GAL4_4	pnr-GAL4_4_11
pnr-GAL4	82	4	12	pnr-GAL4_4	pnr-GAL4_4_12
pnr-GAL4	86	4	13	pnr-GAL4_4	pnr-GAL4_4_13
pnr-GAL4	83	4	14	pnr-GAL4_4	pnr-GAL4_4_14
pnr-GAL4	81	4	15	pnr-GAL4_4	pnr-GAL4_4_15
pnr-GAL4	68	4	16	pnr-GAL4_4	pnr-GAL4_4_16
pnr-GAL4	74	4	17	pnr-GAL4_4	pnr-GAL4_4_17
pnr-GAL4	75	4	18	pnr-GAL4_4	pnr-GAL4_4_18
pnr-GAL4	79	4	19	pnr-GAL4_4	pnr-GAL4_4_19
pnr-GAL4	92	4	20	pnr-GAL4_4	pnr-GAL4_4_20
pnr-GAL4	67	5	1	pnr-GAL4_5	pnr-GAL4_5_1
pnr-GAL4	82	5	2	pnr-GAL4_5	pnr-GAL4_5_2
pnr-GAL4	73	5	3	pnr-GAL4_5	pnr-GAL4_5_3
pnr-GAL4	73	5	4	pnr-GAL4_5	pnr-GAL4_5_4
pnr-GAL4	80	5	5	pnr-GAL4_5	pnr-GAL4_5_5
pnr-GAL4	84	5	6	pnr-GAL4_5	pnr-GAL4_5_6
pnr-GAL4	78	5	7	pnr-GAL4_5	pnr-GAL4_5_7
pnr-GAL4	79	5	8	pnr-GAL4_5	pnr-GAL4_5_8
pnr-GAL4	81	5	9	pnr-GAL4_5	pnr-GAL4_5_9
pnr-GAL4	85	5	10	pnr-GAL4_5	pnr-GAL4_5_10
pnr-GAL4	82	5	11	pnr-GAL4_5	pnr-GAL4_5_11
pnr-GAL4	79	5	12	pnr-GAL4_5	pnr-GAL4_5_12
pnr-GAL4	73	5	13	pnr-GAL4_5	pnr-GAL4_5_13
pnr-GAL4	71	5	14	pnr-GAL4_5	pnr-GAL4_5_14
pnr-GAL4	81	5	15	pnr-GAL4_5	pnr-GAL4_5_15
pnr-GAL4	84	5	16	pnr-GAL4_5	pnr-GAL4_5_16
pnr-GAL4	85	5	17	pnr-GAL4_5	pnr-GAL4_5_17
pnr-GAL4	80	5	18	pnr-GAL4_5	pnr-GAL4_5_18
pnr-GAL4	81	5	19	pnr-GAL4_5	pnr-GAL4_5_19
pnr-GAL4	66	5	20	pnr-GAL4_5	pnr-GAL4_5_20
pnr-GAL4	85	6	1	pnr-GAL4_6	pnr-GAL4_6_1
pnr-GAL4	77	6	2	pnr-GAL4_6	pnr-GAL4_6_2
pnr-GAL4	97	6	3	pnr-GAL4_6	pnr-GAL4_6_3
pnr-GAL4	85	6	4	pnr-GAL4_6	pnr-GAL4_6_4
pnr-GAL4	94	6	5	pnr-GAL4_6	pnr-GAL4_6_5
pnr-GAL4	96	6	6	pnr-GAL4_6	pnr-GAL4_6_6
pnr-GAL4	91	6	7	pnr-GAL4_6	pnr-GAL4_6_7
pnr-GAL4	88	6	8	pnr-GAL4_6	pnr-GAL4_6_8
pnr-GAL4	92	6	9	pnr-GAL4_6	pnr-GAL4_6_9
pnr-GAL4	92	6	10	pnr-GAL4_6	pnr-GAL4_6_10
pnr-GAL4	89	6	11	pnr-GAL4_6	pnr-GAL4_6_11
pnr-GAL4	85	6	12	pnr-GAL4_6	pnr-GAL4_6_12
pnr-GAL4	81	6	13	pnr-GAL4_6	pnr-GAL4_6_13
pnr-GAL4	90	6	14	pnr-GAL4_6	pnr-GAL4_6_14
pnr-GAL4	85	6	15	pnr-GAL4_6	pnr-GAL4_6_15
pnr-GAL4	73	6	16	pnr-GAL4_6	pnr-GAL4_6_16
pnr-GAL4	79	6	17	pnr-GAL4_6	pnr-GAL4_6_17
pnr-GAL4	91	6	18	pnr-GAL4_6	pnr-GAL4_6_18
pnr-GAL4	74	6	19	pnr-GAL4_6	pnr-GAL4_6_19
pnr-GAL4	96	6	20	pnr-GAL4_6	pnr-GAL4_6_20
pnr-GAL4	90	7	1	pnr-GAL4_7	pnr-GAL4_7_1
pnr-GAL4	83	7	2	pnr-GAL4_7	pnr-GAL4_7_2
pnr-GAL4	80	7	3	pnr-GAL4_7	pnr-GAL4_7_3
pnr-GAL4	94	7	4	pnr-GAL4_7	pnr-GAL4_7_4
pnr-GAL4	88	7	5	pnr-GAL4_7	pnr-GAL4_7_5
pnr-GAL4	92	7	6	pnr-GAL4_7	pnr-GAL4_7_6
pnr-GAL4	104	7	7	pnr-GAL4_7	pnr-GAL4_7_7
pnr-GAL4	97	7	8	pnr-GAL4_7	pnr-GAL4_7_8
pnr-GAL4	89	7	9	pnr-GAL4_7	pnr-GAL4_7_9
pnr-GAL4	79	7	10	pnr-GAL4_7	pnr-GAL4_7_10
pnr-GAL4	88	7	11	pnr-GAL4_7	pnr-GAL4_7_11
pnr-GAL4	88	7	12	pnr-GAL4_7	pnr-GAL4_7_12
pnr-GAL4	89	7	13	pnr-GAL4_7	pnr-GAL4_7_13
pnr-GAL4	87	7	14	pnr-GAL4_7	pnr-GAL4_7_14
pnr-GAL4	86	7	15	pnr-GAL4_7	pnr-GAL4_7_15
pnr-GAL4	98	7	16	pnr-GAL4_7	pnr-GAL4_7_16
pnr-GAL4	90	7	17	pnr-GAL4_7	pnr-GAL4_7_17
pnr-GAL4	82	7	18	pnr-GAL4_7	pnr-GAL4_7_18
pnr-GAL4	83	7	19	pnr-GAL4_7	pnr-GAL4_7_19
pnr-GAL4	84	7	20	pnr-GAL4_7	pnr-GAL4_7_20
pnr-GAL4	74	8	1	pnr-GAL4_8	pnr-GAL4_8_1
pnr-GAL4	79	8	2	pnr-GAL4_8	pnr-GAL4_8_2
pnr-GAL4	85	8	3	pnr-GAL4_8	pnr-GAL4_8_3
pnr-GAL4	85	8	4	pnr-GAL4_8	pnr-GAL4_8_4
pnr-GAL4	94	8	5	pnr-GAL4_8	pnr-GAL4_8_5
pnr-GAL4	81	8	6	pnr-GAL4_8	pnr-GAL4_8_6
pnr-GAL4	84	8	7	pnr-GAL4_8	pnr-GAL4_8_7
pnr-GAL4	73	8	8	pnr-GAL4_8	pnr-GAL4_8_8
pnr-GAL4	80	8	9	pnr-GAL4_8	pnr-GAL4_8_9
pnr-GAL4	64	8	10	pnr-GAL4_8	pnr-GAL4_8_10
pnr-GAL4	64	8	11	pnr-GAL4_8	pnr-GAL4_8_11
pnr-GAL4	81	8	12	pnr-GAL4_8	pnr-GAL4_8_12
pnr-GAL4	39	8	13	pnr-GAL4_8	pnr-GAL4_8_13
pnr-GAL4	75	8	14	pnr-GAL4_8	pnr-GAL4_8_14
pnr-GAL4	61	8	15	pnr-GAL4_8	pnr-GAL4_8_15
pnr-GAL4	62	8	16	pnr-GAL4_8	pnr-GAL4_8_16
pnr-GAL4	75	8	17	pnr-GAL4_8	pnr-GAL4_8_17
pnr-GAL4	62	8	18	pnr-GAL4_8	pnr-GAL4_8_18
pnr-GAL4	72	8	19	pnr-GAL4_8	pnr-GAL4_8_19
pnr-GAL4	92	8	20	pnr-GAL4_8	pnr-GAL4_8_20
pnr-GAL4	79	9	1	pnr-GAL4_9	pnr-GAL4_9_1
pnr-GAL4	85	9	2	pnr-GAL4_9	pnr-GAL4_9_2
pnr-GAL4	84	9	3	pnr-GAL4_9	pnr-GAL4_9_3
pnr-GAL4	83	9	4	pnr-GAL4_9	pnr-GAL4_9_4
pnr-GAL4	71	9	5	pnr-GAL4_9	pnr-GAL4_9_5
pnr-GAL4	86	9	6	pnr-GAL4_9	pnr-GAL4_9_6
pnr-GAL4	95	9	7	pnr-GAL4_9	pnr-GAL4_9_7
pnr-GAL4	83	9	8	pnr-GAL4_9	pnr-GAL4_9_8
pnr-GAL4	81	9	9	pnr-GAL4_9	pnr-GAL4_9_9
pnr-GAL4	82	9	10	pnr-GAL4_9	pnr-GAL4_9_10
pnr-GAL4	87	9	11	pnr-GAL4_9	pnr-GAL4_9_11
pnr-GAL4	64	9	12	pnr-GAL4_9	pnr-GAL4_9_12
pnr-GAL4	83	9	13	pnr-GAL4_9	pnr-GAL4_9_13
pnr-GAL4	62	9	14	pnr-GAL4_9	pnr-GAL4_9_14
pnr-GAL4	87	9	15	pnr-GAL4_9	pnr-GAL4_9_15
pnr-GAL4	93	9	16	pnr-GAL4_9	pnr-GAL4_9_16
pnr-GAL4	75	9	17	pnr-GAL4_9	pnr-GAL4_9_17
pnr-GAL4	79	9	18	pnr-GAL4_9	pnr-GAL4_9_18
pnr-GAL4	91	9	19	pnr-GAL4_9	pnr-GAL4_9_19
pnr-GAL4	74	9	20	pnr-GAL4_9	pnr-GAL4_9_20
pnr-GAL4	90	10	1	pnr-GAL4_10	pnr-GAL4_10_1
pnr-GAL4	81	10	2	pnr-GAL4_10	pnr-GAL4_10_2
pnr-GAL4	83	10	3	pnr-GAL4_10	pnr-GAL4_10_3
pnr-GAL4	84	10	4	pnr-GAL4_10	pnr-GAL4_10_4
pnr-GAL4	52	10	5	pnr-GAL4_10	pnr-GAL4_10_5
pnr-GAL4	85	10	6	pnr-GAL4_10	pnr-GAL4_10_6
pnr-GAL4	78	10	7	pnr-GAL4_10	pnr-GAL4_10_7
pnr-GAL4	81	10	8	pnr-GAL4_10	pnr-GAL4_10_8
pnr-GAL4	90	10	9	pnr-GAL4_10	pnr-GAL4_10_9
pnr-GAL4	90	10	10	pnr-GAL4_10	pnr-GAL4_10_10
pnr-GAL4	96	10	11	pnr-GAL4_10	pnr-GAL4_10_11
pnr-GAL4	89	10	12	pnr-GAL4_10	pnr-GAL4_10_12
pnr-GAL4	67	10	13	pnr-GAL4_10	pnr-GAL4_10_13
pnr-GAL4	91	10	14	pnr-GAL4_10	pnr-GAL4_10_14
pnr-GAL4	65	10	15	pnr-GAL4_10	pnr-GAL4_10_15
pnr-GAL4	86	10	16	pnr-GAL4_10	pnr-GAL4_10_16
pnr-GAL4	94	10	17	pnr-GAL4_10	pnr-GAL4_10_17
pnr-GAL4	69	10	18	pnr-GAL4_10	pnr-GAL4_10_18
pnr-GAL4	77	10	19	pnr-GAL4_10	pnr-GAL4_10_19
pnr-GAL4	76	10	20	pnr-GAL4_10	pnr-GAL4_10_20
pnr-GAL4	62	11	1	pnr-GAL4_11	pnr-GAL4_11_1
pnr-GAL4	81	11	2	pnr-GAL4_11	pnr-GAL4_11_2
pnr-GAL4	88	11	3	pnr-GAL4_11	pnr-GAL4_11_3
pnr-GAL4	79	11	4	pnr-GAL4_11	pnr-GAL4_11_4
pnr-GAL4	82	11	5	pnr-GAL4_11	pnr-GAL4_11_5
pnr-GAL4	77	11	6	pnr-GAL4_11	pnr-GAL4_11_6
pnr-GAL4	71	11	7	pnr-GAL4_11	pnr-GAL4_11_7
pnr-GAL4	79	11	8	pnr-GAL4_11	pnr-GAL4_11_8
pnr-GAL4	75	11	9	pnr-GAL4_11	pnr-GAL4_11_9
pnr-GAL4	90	11	10	pnr-GAL4_11	pnr-GAL4_11_10
pnr-GAL4	81	11	11	pnr-GAL4_11	pnr-GAL4_11_11
pnr-GAL4	66	11	12	pnr-GAL4_11	pnr-GAL4_11_12
pnr-GAL4	76	11	13	pnr-GAL4_11	pnr-GAL4_11_13
pnr-GAL4	74	11	14	pnr-GAL4_11	pnr-GAL4_11_14
pnr-GAL4	76	11	15	pnr-GAL4_11	pnr-GAL4_11_15
pnr-GAL4	82	11	16	pnr-GAL4_11	pnr-GAL4_11_16
pnr-GAL4	77	11	17	pnr-GAL4_11	pnr-GAL4_11_17
pnr-GAL4	73	11	18	pnr-GAL4_11	pnr-GAL4_11_18
pnr-GAL4	82	11	19	pnr-GAL4_11	pnr-GAL4_11_19
pnr-GAL4	73	11	20	pnr-GAL4_11	pnr-GAL4_11_20
pnr-GAL4	62	12	1	pnr-GAL4_12	pnr-GAL4_12_1
pnr-GAL4	71	12	2	pnr-GAL4_12	pnr-GAL4_12_2
pnr-GAL4	67	12	3	pnr-GAL4_12	pnr-GAL4_12_3
pnr-GAL4	66	12	4	pnr-GAL4_12	pnr-GAL4_12_4
pnr-GAL4	68	12	5	pnr-GAL4_12	pnr-GAL4_12_5
pnr-GAL4	67	12	6	pnr-GAL4_12	pnr-GAL4_12_6
pnr-GAL4	58	12	7	pnr-GAL4_12	pnr-GAL4_12_7
pnr-GAL4	64	12	8	pnr-GAL4_12	pnr-GAL4_12_8
pnr-GAL4	78	12	9	pnr-GAL4_12	pnr-GAL4_12_9
pnr-GAL4	86	12	10	pnr-GAL4_12	pnr-GAL4_12_10
pnr-GAL4	70	12	11	pnr-GAL4_12	pnr-GAL4_12_11
pnr-GAL4	60	12	12	pnr-GAL4_12	pnr-GAL4_12_12
pnr-GAL4	66	12	13	pnr-GAL4_12	pnr-GAL4_12_13
pnr-GAL4	62	12	14	pnr-GAL4_12	pnr-GAL4_12_14
pnr-GAL4	69	12	15	pnr-GAL4_12	pnr-GAL4_12_15
pnr-GAL4	74	12	16	pnr-GAL4_12	pnr-GAL4_12_16
pnr-GAL4	71	12	17	pnr-GAL4_12	pnr-GAL4_12_17
pnr-GAL4	72	12	18	pnr-GAL4_12	pnr-GAL4_12_18
pnr-GAL4	67	12	19	pnr-GAL4_12	pnr-GAL4_12_19
pnr-GAL4	68	12	20	pnr-GAL4_12	pnr-GAL4_12_20
pnr-GAL4	79	13	1	pnr-GAL4_13	pnr-GAL4_13_1
pnr-GAL4	80	13	2	pnr-GAL4_13	pnr-GAL4_13_2
pnr-GAL4	93	13	3	pnr-GAL4_13	pnr-GAL4_13_3
pnr-GAL4	87	13	4	pnr-GAL4_13	pnr-GAL4_13_4
pnr-GAL4	83	13	5	pnr-GAL4_13	pnr-GAL4_13_5
pnr-GAL4	84	13	6	pnr-GAL4_13	pnr-GAL4_13_6
pnr-GAL4	88	13	7	pnr-GAL4_13	pnr-GAL4_13_7
pnr-GAL4	72	13	8	pnr-GAL4_13	pnr-GAL4_13_8
pnr-GAL4	74	13	9	pnr-GAL4_13	pnr-GAL4_13_9
pnr-GAL4	88	13	10	pnr-GAL4_13	pnr-GAL4_13_10
pnr-GAL4	85	13	11	pnr-GAL4_13	pnr-GAL4_13_11
pnr-GAL4	98	13	12	pnr-GAL4_13	pnr-GAL4_13_12
pnr-GAL4	76	13	13	pnr-GAL4_13	pnr-GAL4_13_13
pnr-GAL4	80	13	14	pnr-GAL4_13	pnr-GAL4_13_14
pnr-GAL4	84	13	15	pnr-GAL4_13	pnr-GAL4_13_15
pnr-GAL4	73	13	16	pnr-GAL4_13	pnr-GAL4_13_16
pnr-GAL4	74	13	17	pnr-GAL4_13	pnr-GAL4_13_17
pnr-GAL4	77	13	18	pnr-GAL4_13	pnr-GAL4_13_18
pnr-GAL4	79	13	19	pnr-GAL4_13	pnr-GAL4_13_19
pnr-GAL4	80	13	20	pnr-GAL4_13	pnr-GAL4_13_20
pnr-GAL4	73	14	1	pnr-GAL4_14	pnr-GAL4_14_1
pnr-GAL4	82	14	2	pnr-GAL4_14	pnr-GAL4_14_2
pnr-GAL4	90	14	3	pnr-GAL4_14	pnr-GAL4_14_3
pnr-GAL4	71	14	4	pnr-GAL4_14	pnr-GAL4_14_4
pnr-GAL4	83	14	5	pnr-GAL4_14	pnr-GAL4_14_5
pnr-GAL4	88	14	6	pnr-GAL4_14	pnr-GAL4_14_6
pnr-GAL4	83	14	7	pnr-GAL4_14	pnr-GAL4_14_7
pnr-GAL4	82	14	8	pnr-GAL4_14	pnr-GAL4_14_8
pnr-GAL4	85	14	9	pnr-GAL4_14	pnr-GAL4_14_9
pnr-GAL4	85	14	10	pnr-GAL4_14	pnr-GAL4_14_10
pnr-GAL4	92	14	11	pnr-GAL4_14	pnr-GAL4_14_11
pnr-GAL4	86	14	12	pnr-GAL4_14	pnr-GAL4_14_12
pnr-GAL4	70	14	13	pnr-GAL4_14	pnr-GAL4_14_13
pnr-GAL4	76	14	14	pnr-GAL4_14	pnr-GAL4_14_14
pnr-GAL4	79	14	15	pnr-GAL4_14	pnr-GAL4_14_15
pnr-GAL4	85	14	16	pnr-GAL4_14	pnr-GAL4_14_16
pnr-GAL4	85	14	17	pnr-GAL4_14	pnr-GAL4_14_17
pnr-GAL4	91	14	18	pnr-GAL4_14	pnr-GAL4_14_18
pnr-GAL4	86	14	19	pnr-GAL4_14	pnr-GAL4_14_19
pnr-GAL4	85	14	20	pnr-GAL4_14	pnr-GAL4_14_20
pnr-GAL4	56	15	1	pnr-GAL4_15	pnr-GAL4_15_1
pnr-GAL4	86	15	2	pnr-GAL4_15	pnr-GAL4_15_2
pnr-GAL4	81	15	3	pnr-GAL4_15	pnr-GAL4_15_3
pnr-GAL4	92	15	4	pnr-GAL4_15	pnr-GAL4_15_4
pnr-GAL4	83	15	5	pnr-GAL4_15	pnr-GAL4_15_5
pnr-GAL4	84	15	6	pnr-GAL4_15	pnr-GAL4_15_6
pnr-GAL4	92	15	7	pnr-GAL4_15	pnr-GAL4_15_7
pnr-GAL4	87	15	8	pnr-GAL4_15	pnr-GAL4_15_8
pnr-GAL4	73	15	9	pnr-GAL4_15	pnr-GAL4_15_9
pnr-GAL4	101	15	10	pnr-GAL4_15	pnr-GAL4_15_10
pnr-GAL4	84	15	11	pnr-GAL4_15	pnr-GAL4_15_11
pnr-GAL4	80	15	12	pnr-GAL4_15	pnr-GAL4_15_12
pnr-GAL4	97	15	13	pnr-GAL4_15	pnr-GAL4_15_13
pnr-GAL4	78	15	14	pnr-GAL4_15	pnr-GAL4_15_14
pnr-GAL4	77	15	15	pnr-GAL4_15	pnr-GAL4_15_15
pnr-GAL4	72	15	16	pnr-GAL4_15	pnr-GAL4_15_16
pnr-GAL4	72	15	17	pnr-GAL4_15	pnr-GAL4_15_17
pnr-GAL4	93	15	18	pnr-GAL4_15	pnr-GAL4_15_18
pnr-GAL4	93	15	19	pnr-GAL4_15	pnr-GAL4_15_19
pnr-GAL4	91	15	20	pnr-GAL4_15	pnr-GAL4_15_20
pnr-GAL4 > UAS-YippeeRNAi	74	1	1	pnr-GAL4 > UAS-YippeeRNAi_1	pnr-GAL4 > UAS-YippeeRNAi_1_1
pnr-GAL4 > UAS-YippeeRNAi	66	1	2	pnr-GAL4 > UAS-YippeeRNAi_1	pnr-GAL4 > UAS-YippeeRNAi_1_2
pnr-GAL4 > UAS-YippeeRNAi	61	1	3	pnr-GAL4 > UAS-YippeeRNAi_1	pnr-GAL4 > UAS-YippeeRNAi_1_3
pnr-GAL4 > UAS-YippeeRNAi	66	1	4	pnr-GAL4 > UAS-YippeeRNAi_1	pnr-GAL4 > UAS-YippeeRNAi_1_4
pnr-GAL4 > UAS-YippeeRNAi	70	1	5	pnr-GAL4 > UAS-YippeeRNAi_1	pnr-GAL4 > UAS-YippeeRNAi_1_5
pnr-GAL4 > UAS-YippeeRNAi	70	1	6	pnr-GAL4 > UAS-YippeeRNAi_1	pnr-GAL4 > UAS-YippeeRNAi_1_6
pnr-GAL4 > UAS-YippeeRNAi	70	1	7	pnr-GAL4 > UAS-YippeeRNAi_1	pnr-GAL4 > UAS-YippeeRNAi_1_7
pnr-GAL4 > UAS-YippeeRNAi	83	1	8	pnr-GAL4 > UAS-YippeeRNAi_1	pnr-GAL4 > UAS-YippeeRNAi_1_8
pnr-GAL4 > UAS-YippeeRNAi	83	1	9	pnr-GAL4 > UAS-YippeeRNAi_1	pnr-GAL4 > UAS-YippeeRNAi_1_9
pnr-GAL4 > UAS-YippeeRNAi	71	1	10	pnr-GAL4 > UAS-YippeeRNAi_1	pnr-GAL4 > UAS-YippeeRNAi_1_10
pnr-GAL4 > UAS-YippeeRNAi	71	1	11	pnr-GAL4 > UAS-YippeeRNAi_1	pnr-GAL4 > UAS-YippeeRNAi_1_11
pnr-GAL4 > UAS-YippeeRNAi	75	1	12	pnr-GAL4 > UAS-YippeeRNAi_1	pnr-GAL4 > UAS-YippeeRNAi_1_12
pnr-GAL4 > UAS-YippeeRNAi	48	1	13	pnr-GAL4 > UAS-YippeeRNAi_1	pnr-GAL4 > UAS-YippeeRNAi_1_13
pnr-GAL4 > UAS-YippeeRNAi	42	1	14	pnr-GAL4 > UAS-YippeeRNAi_1	pnr-GAL4 > UAS-YippeeRNAi_1_14
pnr-GAL4 > UAS-YippeeRNAi	44	1	15	pnr-GAL4 > UAS-YippeeRNAi_1	pnr-GAL4 > UAS-YippeeRNAi_1_15
pnr-GAL4 > UAS-YippeeRNAi	51	1	16	pnr-GAL4 > UAS-YippeeRNAi_1	pnr-GAL4 > UAS-YippeeRNAi_1_16
pnr-GAL4 > UAS-YippeeRNAi	43	1	17	pnr-GAL4 > UAS-YippeeRNAi_1	pnr-GAL4 > UAS-YippeeRNAi_1_17
pnr-GAL4 > UAS-YippeeRNAi	54	1	18	pnr-GAL4 > UAS-YippeeRNAi_1	pnr-GAL4 > UAS-YippeeRNAi_1_18
pnr-GAL4 > UAS-YippeeRNAi	78	1	19	pnr-GAL4 > UAS-YippeeRNAi_1	pnr-GAL4 > UAS-YippeeRNAi_1_19
pnr-GAL4 > UAS-YippeeRNAi	83	1	20	pnr-GAL4 > UAS-YippeeRNAi_1	pnr-GAL4 > UAS-YippeeRNAi_1_20
pnr-GAL4 > UAS-YippeeRNAi	48	2	1	pnr-GAL4 > UAS-YippeeRNAi_2	pnr-GAL4 > UAS-YippeeRNAi_2_1
pnr-GAL4 > UAS-YippeeRNAi	57	2	2	pnr-GAL4 > UAS-YippeeRNAi_2	pnr-GAL4 > UAS-YippeeRNAi_2_2
pnr-GAL4 > UAS-YippeeRNAi	77	2	3	pnr-GAL4 > UAS-YippeeRNAi_2	pnr-GAL4 > UAS-YippeeRNAi_2_3
pnr-GAL4 > UAS-YippeeRNAi	64	2	4	pnr-GAL4 > UAS-YippeeRNAi_2	pnr-GAL4 > UAS-YippeeRNAi_2_4
pnr-GAL4 > UAS-YippeeRNAi	76	2	5	pnr-GAL4 > UAS-YippeeRNAi_2	pnr-GAL4 > UAS-YippeeRNAi_2_5
pnr-GAL4 > UAS-YippeeRNAi	85	2	6	pnr-GAL4 > UAS-YippeeRNAi_2	pnr-GAL4 > UAS-YippeeRNAi_2_6
pnr-GAL4 > UAS-YippeeRNAi	80	2	7	pnr-GAL4 > UAS-YippeeRNAi_2	pnr-GAL4 > UAS-YippeeRNAi_2_7
pnr-GAL4 > UAS-YippeeRNAi	67	2	8	pnr-GAL4 > UAS-YippeeRNAi_2	pnr-GAL4 > UAS-YippeeRNAi_2_8
pnr-GAL4 > UAS-YippeeRNAi	71	2	9	pnr-GAL4 > UAS-YippeeRNAi_2	pnr-GAL4 > UAS-YippeeRNAi_2_9
pnr-GAL4 > UAS-YippeeRNAi	64	2	10	pnr-GAL4 > UAS-YippeeRNAi_2	pnr-GAL4 > UAS-YippeeRNAi_2_10
pnr-GAL4 > UAS-YippeeRNAi	55	2	11	pnr-GAL4 > UAS-YippeeRNAi_2	pnr-GAL4 > UAS-YippeeRNAi_2_11
pnr-GAL4 > UAS-YippeeRNAi	42	2	12	pnr-GAL4 > UAS-YippeeRNAi_2	pnr-GAL4 > UAS-YippeeRNAi_2_12
pnr-GAL4 > UAS-YippeeRNAi	56	2	13	pnr-GAL4 > UAS-YippeeRNAi_2	pnr-GAL4 > UAS-YippeeRNAi_2_13
pnr-GAL4 > UAS-YippeeRNAi	55	2	14	pnr-GAL4 > UAS-YippeeRNAi_2	pnr-GAL4 > UAS-YippeeRNAi_2_14
pnr-GAL4 > UAS-YippeeRNAi	43	2	15	pnr-GAL4 > UAS-YippeeRNAi_2	pnr-GAL4 > UAS-YippeeRNAi_2_15
pnr-GAL4 > UAS-YippeeRNAi	40	2	16	pnr-GAL4 > UAS-YippeeRNAi_2	pnr-GAL4 > UAS-YippeeRNAi_2_16
pnr-GAL4 > UAS-YippeeRNAi	45	2	17	pnr-GAL4 > UAS-YippeeRNAi_2	pnr-GAL4 > UAS-YippeeRNAi_2_17
pnr-GAL4 > UAS-YippeeRNAi	61	2	18	pnr-GAL4 > UAS-YippeeRNAi_2	pnr-GAL4 > UAS-YippeeRNAi_2_18
pnr-GAL4 > UAS-YippeeRNAi	64	2	19	pnr-GAL4 > UAS-YippeeRNAi_2	pnr-GAL4 > UAS-YippeeRNAi_2_19
pnr-GAL4 > UAS-YippeeRNAi	83	2	20	pnr-GAL4 > UAS-YippeeRNAi_2	pnr-GAL4 > UAS-YippeeRNAi_2_20
pnr-GAL4 > UAS-YippeeRNAi	71	3	1	pnr-GAL4 > UAS-YippeeRNAi_3	pnr-GAL4 > UAS-YippeeRNAi_3_1
pnr-GAL4 > UAS-YippeeRNAi	54	3	2	pnr-GAL4 > UAS-YippeeRNAi_3	pnr-GAL4 > UAS-YippeeRNAi_3_2
pnr-GAL4 > UAS-YippeeRNAi	64	3	3	pnr-GAL4 > UAS-YippeeRNAi_3	pnr-GAL4 > UAS-YippeeRNAi_3_3
pnr-GAL4 > UAS-YippeeRNAi	69	3	4	pnr-GAL4 > UAS-YippeeRNAi_3	pnr-GAL4 > UAS-YippeeRNAi_3_4
pnr-GAL4 > UAS-YippeeRNAi	79	3	5	pnr-GAL4 > UAS-YippeeRNAi_3	pnr-GAL4 > UAS-YippeeRNAi_3_5
pnr-GAL4 > UAS-YippeeRNAi	85	3	6	pnr-GAL4 > UAS-YippeeRNAi_3	pnr-GAL4 > UAS-YippeeRNAi_3_6
pnr-GAL4 > UAS-YippeeRNAi	90	3	7	pnr-GAL4 > UAS-YippeeRNAi_3	pnr-GAL4 > UAS-YippeeRNAi_3_7
pnr-GAL4 > UAS-YippeeRNAi	90	3	8	pnr-GAL4 > UAS-YippeeRNAi_3	pnr-GAL4 > UAS-YippeeRNAi_3_8
pnr-GAL4 > UAS-YippeeRNAi	61	3	9	pnr-GAL4 > UAS-YippeeRNAi_3	pnr-GAL4 > UAS-YippeeRNAi_3_9
pnr-GAL4 > UAS-YippeeRNAi	49	3	10	pnr-GAL4 > UAS-YippeeRNAi_3	pnr-GAL4 > UAS-YippeeRNAi_3_10
pnr-GAL4 > UAS-YippeeRNAi	61	3	11	pnr-GAL4 > UAS-YippeeRNAi_3	pnr-GAL4 > UAS-YippeeRNAi_3_11
pnr-GAL4 > UAS-YippeeRNAi	48	3	12	pnr-GAL4 > UAS-YippeeRNAi_3	pnr-GAL4 > UAS-YippeeRNAi_3_12
pnr-GAL4 > UAS-YippeeRNAi	60	3	13	pnr-GAL4 > UAS-YippeeRNAi_3	pnr-GAL4 > UAS-YippeeRNAi_3_13
pnr-GAL4 > UAS-YippeeRNAi	54	3	14	pnr-GAL4 > UAS-YippeeRNAi_3	pnr-GAL4 > UAS-YippeeRNAi_3_14
pnr-GAL4 > UAS-YippeeRNAi	47	3	15	pnr-GAL4 > UAS-YippeeRNAi_3	pnr-GAL4 > UAS-YippeeRNAi_3_15
pnr-GAL4 > UAS-YippeeRNAi	51	3	16	pnr-GAL4 > UAS-YippeeRNAi_3	pnr-GAL4 > UAS-YippeeRNAi_3_16
pnr-GAL4 > UAS-YippeeRNAi	44	3	17	pnr-GAL4 > UAS-YippeeRNAi_3	pnr-GAL4 > UAS-YippeeRNAi_3_17
pnr-GAL4 > UAS-YippeeRNAi	87	3	18	pnr-GAL4 > UAS-YippeeRNAi_3	pnr-GAL4 > UAS-YippeeRNAi_3_18
pnr-GAL4 > UAS-YippeeRNAi	81	3	19	pnr-GAL4 > UAS-YippeeRNAi_3	pnr-GAL4 > UAS-YippeeRNAi_3_19
pnr-GAL4 > UAS-YippeeRNAi	79	3	20	pnr-GAL4 > UAS-YippeeRNAi_3	pnr-GAL4 > UAS-YippeeRNAi_3_20
pnr-GAL4 > UAS-YippeeRNAi	60	4	1	pnr-GAL4 > UAS-YippeeRNAi_4	pnr-GAL4 > UAS-YippeeRNAi_4_1
pnr-GAL4 > UAS-YippeeRNAi	57	4	2	pnr-GAL4 > UAS-YippeeRNAi_4	pnr-GAL4 > UAS-YippeeRNAi_4_2
pnr-GAL4 > UAS-YippeeRNAi	73	4	3	pnr-GAL4 > UAS-YippeeRNAi_4	pnr-GAL4 > UAS-YippeeRNAi_4_3
pnr-GAL4 > UAS-YippeeRNAi	69	4	4	pnr-GAL4 > UAS-YippeeRNAi_4	pnr-GAL4 > UAS-YippeeRNAi_4_4
pnr-GAL4 > UAS-YippeeRNAi	85	4	5	pnr-GAL4 > UAS-YippeeRNAi_4	pnr-GAL4 > UAS-YippeeRNAi_4_5
pnr-GAL4 > UAS-YippeeRNAi	86	4	6	pnr-GAL4 > UAS-YippeeRNAi_4	pnr-GAL4 > UAS-YippeeRNAi_4_6
pnr-GAL4 > UAS-YippeeRNAi	85	4	7	pnr-GAL4 > UAS-YippeeRNAi_4	pnr-GAL4 > UAS-YippeeRNAi_4_7
pnr-GAL4 > UAS-YippeeRNAi	64	4	8	pnr-GAL4 > UAS-YippeeRNAi_4	pnr-GAL4 > UAS-YippeeRNAi_4_8
pnr-GAL4 > UAS-YippeeRNAi	60	4	9	pnr-GAL4 > UAS-YippeeRNAi_4	pnr-GAL4 > UAS-YippeeRNAi_4_9
pnr-GAL4 > UAS-YippeeRNAi	60	4	10	pnr-GAL4 > UAS-YippeeRNAi_4	pnr-GAL4 > UAS-YippeeRNAi_4_10
pnr-GAL4 > UAS-YippeeRNAi	50	4	11	pnr-GAL4 > UAS-YippeeRNAi_4	pnr-GAL4 > UAS-YippeeRNAi_4_11
pnr-GAL4 > UAS-YippeeRNAi	60	4	12	pnr-GAL4 > UAS-YippeeRNAi_4	pnr-GAL4 > UAS-YippeeRNAi_4_12
pnr-GAL4 > UAS-YippeeRNAi	52	4	13	pnr-GAL4 > UAS-YippeeRNAi_4	pnr-GAL4 > UAS-YippeeRNAi_4_13
pnr-GAL4 > UAS-YippeeRNAi	53	4	14	pnr-GAL4 > UAS-YippeeRNAi_4	pnr-GAL4 > UAS-YippeeRNAi_4_14
pnr-GAL4 > UAS-YippeeRNAi	51	4	15	pnr-GAL4 > UAS-YippeeRNAi_4	pnr-GAL4 > UAS-YippeeRNAi_4_15
pnr-GAL4 > UAS-YippeeRNAi	51	4	16	pnr-GAL4 > UAS-YippeeRNAi_4	pnr-GAL4 > UAS-YippeeRNAi_4_16
pnr-GAL4 > UAS-YippeeRNAi	62	4	17	pnr-GAL4 > UAS-YippeeRNAi_4	pnr-GAL4 > UAS-YippeeRNAi_4_17
pnr-GAL4 > UAS-YippeeRNAi	68	4	18	pnr-GAL4 > UAS-YippeeRNAi_4	pnr-GAL4 > UAS-YippeeRNAi_4_18
pnr-GAL4 > UAS-YippeeRNAi	68	4	19	pnr-GAL4 > UAS-YippeeRNAi_4	pnr-GAL4 > UAS-YippeeRNAi_4_19
pnr-GAL4 > UAS-YippeeRNAi	69	4	20	pnr-GAL4 > UAS-YippeeRNAi_4	pnr-GAL4 > UAS-YippeeRNAi_4_20
pnr-GAL4 > UAS-YippeeRNAi	65	5	1	pnr-GAL4 > UAS-YippeeRNAi_5	pnr-GAL4 > UAS-YippeeRNAi_5_1
pnr-GAL4 > UAS-YippeeRNAi	53	5	2	pnr-GAL4 > UAS-YippeeRNAi_5	pnr-GAL4 > UAS-YippeeRNAi_5_2
pnr-GAL4 > UAS-YippeeRNAi	60	5	3	pnr-GAL4 > UAS-YippeeRNAi_5	pnr-GAL4 > UAS-YippeeRNAi_5_3
pnr-GAL4 > UAS-YippeeRNAi	59	5	4	pnr-GAL4 > UAS-YippeeRNAi_5	pnr-GAL4 > UAS-YippeeRNAi_5_4
pnr-GAL4 > UAS-YippeeRNAi	54	5	5	pnr-GAL4 > UAS-YippeeRNAi_5	pnr-GAL4 > UAS-YippeeRNAi_5_5
pnr-GAL4 > UAS-YippeeRNAi	62	5	6	pnr-GAL4 > UAS-YippeeRNAi_5	pnr-GAL4 > UAS-YippeeRNAi_5_6
pnr-GAL4 > UAS-YippeeRNAi	51	5	7	pnr-GAL4 > UAS-YippeeRNAi_5	pnr-GAL4 > UAS-YippeeRNAi_5_7
pnr-GAL4 > UAS-YippeeRNAi	42	5	8	pnr-GAL4 > UAS-YippeeRNAi_5	pnr-GAL4 > UAS-YippeeRNAi_5_8
pnr-GAL4 > UAS-YippeeRNAi	40	5	9	pnr-GAL4 > UAS-YippeeRNAi_5	pnr-GAL4 > UAS-YippeeRNAi_5_9
pnr-GAL4 > UAS-YippeeRNAi	36	5	10	pnr-GAL4 > UAS-YippeeRNAi_5	pnr-GAL4 > UAS-YippeeRNAi_5_10
pnr-GAL4 > UAS-YippeeRNAi	38	5	11	pnr-GAL4 > UAS-YippeeRNAi_5	pnr-GAL4 > UAS-YippeeRNAi_5_11
pnr-GAL4 > UAS-YippeeRNAi	39	5	12	pnr-GAL4 > UAS-YippeeRNAi_5	pnr-GAL4 > UAS-YippeeRNAi_5_12
pnr-GAL4 > UAS-YippeeRNAi	51	5	13	pnr-GAL4 > UAS-YippeeRNAi_5	pnr-GAL4 > UAS-YippeeRNAi_5_13
pnr-GAL4 > UAS-YippeeRNAi	52	5	14	pnr-GAL4 > UAS-YippeeRNAi_5	pnr-GAL4 > UAS-YippeeRNAi_5_14
pnr-GAL4 > UAS-YippeeRNAi	66	5	15	pnr-GAL4 > UAS-YippeeRNAi_5	pnr-GAL4 > UAS-YippeeRNAi_5_15
pnr-GAL4 > UAS-YippeeRNAi	69	5	16	pnr-GAL4 > UAS-YippeeRNAi_5	pnr-GAL4 > UAS-YippeeRNAi_5_16
pnr-GAL4 > UAS-YippeeRNAi	71	5	17	pnr-GAL4 > UAS-YippeeRNAi_5	pnr-GAL4 > UAS-YippeeRNAi_5_17
pnr-GAL4 > UAS-YippeeRNAi	49	5	18	pnr-GAL4 > UAS-YippeeRNAi_5	pnr-GAL4 > UAS-YippeeRNAi_5_18
pnr-GAL4 > UAS-YippeeRNAi	51	5	19	pnr-GAL4 > UAS-YippeeRNAi_5	pnr-GAL4 > UAS-YippeeRNAi_5_19
pnr-GAL4 > UAS-YippeeRNAi	52	5	20	pnr-GAL4 > UAS-YippeeRNAi_5	pnr-GAL4 > UAS-YippeeRNAi_5_20
pnr-GAL4 > UAS-YippeeRNAi	55	6	1	pnr-GAL4 > UAS-YippeeRNAi_6	pnr-GAL4 > UAS-YippeeRNAi_6_1
pnr-GAL4 > UAS-YippeeRNAi	54	6	2	pnr-GAL4 > UAS-YippeeRNAi_6	pnr-GAL4 > UAS-YippeeRNAi_6_2
pnr-GAL4 > UAS-YippeeRNAi	53	6	3	pnr-GAL4 > UAS-YippeeRNAi_6	pnr-GAL4 > UAS-YippeeRNAi_6_3
pnr-GAL4 > UAS-YippeeRNAi	71	6	4	pnr-GAL4 > UAS-YippeeRNAi_6	pnr-GAL4 > UAS-YippeeRNAi_6_4
pnr-GAL4 > UAS-YippeeRNAi	70	6	5	pnr-GAL4 > UAS-YippeeRNAi_6	pnr-GAL4 > UAS-YippeeRNAi_6_5
pnr-GAL4 > UAS-YippeeRNAi	88	6	6	pnr-GAL4 > UAS-YippeeRNAi_6	pnr-GAL4 > UAS-YippeeRNAi_6_6
pnr-GAL4 > UAS-YippeeRNAi	92	6	7	pnr-GAL4 > UAS-YippeeRNAi_6	pnr-GAL4 > UAS-YippeeRNAi_6_7
pnr-GAL4 > UAS-YippeeRNAi	76	6	8	pnr-GAL4 > UAS-YippeeRNAi_6	pnr-GAL4 > UAS-YippeeRNAi_6_8
pnr-GAL4 > UAS-YippeeRNAi	66	6	9	pnr-GAL4 > UAS-YippeeRNAi_6	pnr-GAL4 > UAS-YippeeRNAi_6_9
pnr-GAL4 > UAS-YippeeRNAi	67	6	10	pnr-GAL4 > UAS-YippeeRNAi_6	pnr-GAL4 > UAS-YippeeRNAi_6_10
pnr-GAL4 > UAS-YippeeRNAi	59	6	11	pnr-GAL4 > UAS-YippeeRNAi_6	pnr-GAL4 > UAS-YippeeRNAi_6_11
pnr-GAL4 > UAS-YippeeRNAi	50	6	12	pnr-GAL4 > UAS-YippeeRNAi_6	pnr-GAL4 > UAS-YippeeRNAi_6_12
pnr-GAL4 > UAS-YippeeRNAi	48	6	13	pnr-GAL4 > UAS-YippeeRNAi_6	pnr-GAL4 > UAS-YippeeRNAi_6_13
pnr-GAL4 > UAS-YippeeRNAi	53	6	14	pnr-GAL4 > UAS-YippeeRNAi_6	pnr-GAL4 > UAS-YippeeRNAi_6_14
pnr-GAL4 > UAS-YippeeRNAi	48	6	15	pnr-GAL4 > UAS-YippeeRNAi_6	pnr-GAL4 > UAS-YippeeRNAi_6_15
pnr-GAL4 > UAS-YippeeRNAi	64	6	16	pnr-GAL4 > UAS-YippeeRNAi_6	pnr-GAL4 > UAS-YippeeRNAi_6_16
pnr-GAL4 > UAS-YippeeRNAi	74	6	17	pnr-GAL4 > UAS-YippeeRNAi_6	pnr-GAL4 > UAS-YippeeRNAi_6_17
pnr-GAL4 > UAS-YippeeRNAi	91	6	18	pnr-GAL4 > UAS-YippeeRNAi_6	pnr-GAL4 > UAS-YippeeRNAi_6_18
pnr-GAL4 > UAS-YippeeRNAi	93	6	19	pnr-GAL4 > UAS-YippeeRNAi_6	pnr-GAL4 > UAS-YippeeRNAi_6_19
pnr-GAL4 > UAS-YippeeRNAi	66	6	20	pnr-GAL4 > UAS-YippeeRNAi_6	pnr-GAL4 > UAS-YippeeRNAi_6_20
pnr-GAL4 > UAS-YippeeRNAi	53	7	1	pnr-GAL4 > UAS-YippeeRNAi_7	pnr-GAL4 > UAS-YippeeRNAi_7_1
pnr-GAL4 > UAS-YippeeRNAi	55	7	2	pnr-GAL4 > UAS-YippeeRNAi_7	pnr-GAL4 > UAS-YippeeRNAi_7_2
pnr-GAL4 > UAS-YippeeRNAi	46	7	3	pnr-GAL4 > UAS-YippeeRNAi_7	pnr-GAL4 > UAS-YippeeRNAi_7_3
pnr-GAL4 > UAS-YippeeRNAi	57	7	4	pnr-GAL4 > UAS-YippeeRNAi_7	pnr-GAL4 > UAS-YippeeRNAi_7_4
pnr-GAL4 > UAS-YippeeRNAi	67	7	5	pnr-GAL4 > UAS-YippeeRNAi_7	pnr-GAL4 > UAS-YippeeRNAi_7_5
pnr-GAL4 > UAS-YippeeRNAi	73	7	6	pnr-GAL4 > UAS-YippeeRNAi_7	pnr-GAL4 > UAS-YippeeRNAi_7_6
pnr-GAL4 > UAS-YippeeRNAi	87	7	7	pnr-GAL4 > UAS-YippeeRNAi_7	pnr-GAL4 > UAS-YippeeRNAi_7_7
pnr-GAL4 > UAS-YippeeRNAi	103	7	8	pnr-GAL4 > UAS-YippeeRNAi_7	pnr-GAL4 > UAS-YippeeRNAi_7_8
pnr-GAL4 > UAS-YippeeRNAi	109	7	9	pnr-GAL4 > UAS-YippeeRNAi_7	pnr-GAL4 > UAS-YippeeRNAi_7_9
pnr-GAL4 > UAS-YippeeRNAi	93	7	10	pnr-GAL4 > UAS-YippeeRNAi_7	pnr-GAL4 > UAS-YippeeRNAi_7_10
pnr-GAL4 > UAS-YippeeRNAi	92	7	11	pnr-GAL4 > UAS-YippeeRNAi_7	pnr-GAL4 > UAS-YippeeRNAi_7_11
pnr-GAL4 > UAS-YippeeRNAi	62	7	12	pnr-GAL4 > UAS-YippeeRNAi_7	pnr-GAL4 > UAS-YippeeRNAi_7_12
pnr-GAL4 > UAS-YippeeRNAi	65	7	13	pnr-GAL4 > UAS-YippeeRNAi_7	pnr-GAL4 > UAS-YippeeRNAi_7_13
pnr-GAL4 > UAS-YippeeRNAi	51	7	14	pnr-GAL4 > UAS-YippeeRNAi_7	pnr-GAL4 > UAS-YippeeRNAi_7_14
pnr-GAL4 > UAS-YippeeRNAi	50	7	15	pnr-GAL4 > UAS-YippeeRNAi_7	pnr-GAL4 > UAS-YippeeRNAi_7_15
pnr-GAL4 > UAS-YippeeRNAi	52	7	16	pnr-GAL4 > UAS-YippeeRNAi_7	pnr-GAL4 > UAS-YippeeRNAi_7_16
pnr-GAL4 > UAS-YippeeRNAi	62	7	17	pnr-GAL4 > UAS-YippeeRNAi_7	pnr-GAL4 > UAS-YippeeRNAi_7_17
pnr-GAL4 > UAS-YippeeRNAi	60	7	18	pnr-GAL4 > UAS-YippeeRNAi_7	pnr-GAL4 > UAS-YippeeRNAi_7_18
pnr-GAL4 > UAS-YippeeRNAi	58	7	19	pnr-GAL4 > UAS-YippeeRNAi_7	pnr-GAL4 > UAS-YippeeRNAi_7_19
pnr-GAL4 > UAS-YippeeRNAi	82	7	20	pnr-GAL4 > UAS-YippeeRNAi_7	pnr-GAL4 > UAS-YippeeRNAi_7_20
pnr-GAL4 > UAS-YippeeRNAi	72	8	1	pnr-GAL4 > UAS-YippeeRNAi_8	pnr-GAL4 > UAS-YippeeRNAi_8_1
pnr-GAL4 > UAS-YippeeRNAi	63	8	2	pnr-GAL4 > UAS-YippeeRNAi_8	pnr-GAL4 > UAS-YippeeRNAi_8_2
pnr-GAL4 > UAS-YippeeRNAi	61	8	3	pnr-GAL4 > UAS-YippeeRNAi_8	pnr-GAL4 > UAS-YippeeRNAi_8_3
pnr-GAL4 > UAS-YippeeRNAi	56	8	4	pnr-GAL4 > UAS-YippeeRNAi_8	pnr-GAL4 > UAS-YippeeRNAi_8_4
pnr-GAL4 > UAS-YippeeRNAi	63	8	5	pnr-GAL4 > UAS-YippeeRNAi_8	pnr-GAL4 > UAS-YippeeRNAi_8_5
pnr-GAL4 > UAS-YippeeRNAi	76	8	6	pnr-GAL4 > UAS-YippeeRNAi_8	pnr-GAL4 > UAS-YippeeRNAi_8_6
pnr-GAL4 > UAS-YippeeRNAi	76	8	7	pnr-GAL4 > UAS-YippeeRNAi_8	pnr-GAL4 > UAS-YippeeRNAi_8_7
pnr-GAL4 > UAS-YippeeRNAi	75	8	8	pnr-GAL4 > UAS-YippeeRNAi_8	pnr-GAL4 > UAS-YippeeRNAi_8_8
pnr-GAL4 > UAS-YippeeRNAi	51	8	9	pnr-GAL4 > UAS-YippeeRNAi_8	pnr-GAL4 > UAS-YippeeRNAi_8_9
pnr-GAL4 > UAS-YippeeRNAi	40	8	10	pnr-GAL4 > UAS-YippeeRNAi_8	pnr-GAL4 > UAS-YippeeRNAi_8_10
pnr-GAL4 > UAS-YippeeRNAi	42	8	11	pnr-GAL4 > UAS-YippeeRNAi_8	pnr-GAL4 > UAS-YippeeRNAi_8_11
pnr-GAL4 > UAS-YippeeRNAi	42	8	12	pnr-GAL4 > UAS-YippeeRNAi_8	pnr-GAL4 > UAS-YippeeRNAi_8_12
pnr-GAL4 > UAS-YippeeRNAi	54	8	13	pnr-GAL4 > UAS-YippeeRNAi_8	pnr-GAL4 > UAS-YippeeRNAi_8_13
pnr-GAL4 > UAS-YippeeRNAi	56	8	14	pnr-GAL4 > UAS-YippeeRNAi_8	pnr-GAL4 > UAS-YippeeRNAi_8_14
pnr-GAL4 > UAS-YippeeRNAi	68	8	15	pnr-GAL4 > UAS-YippeeRNAi_8	pnr-GAL4 > UAS-YippeeRNAi_8_15
pnr-GAL4 > UAS-YippeeRNAi	53	8	16	pnr-GAL4 > UAS-YippeeRNAi_8	pnr-GAL4 > UAS-YippeeRNAi_8_16
pnr-GAL4 > UAS-YippeeRNAi	68	8	17	pnr-GAL4 > UAS-YippeeRNAi_8	pnr-GAL4 > UAS-YippeeRNAi_8_17
pnr-GAL4 > UAS-YippeeRNAi	57	8	18	pnr-GAL4 > UAS-YippeeRNAi_8	pnr-GAL4 > UAS-YippeeRNAi_8_18
pnr-GAL4 > UAS-YippeeRNAi	73	8	19	pnr-GAL4 > UAS-YippeeRNAi_8	pnr-GAL4 > UAS-YippeeRNAi_8_19
pnr-GAL4 > UAS-YippeeRNAi	74	8	20	pnr-GAL4 > UAS-YippeeRNAi_8	pnr-GAL4 > UAS-YippeeRNAi_8_20
pnr-GAL4 > UAS-YippeeRNAi	46	9	1	pnr-GAL4 > UAS-YippeeRNAi_9	pnr-GAL4 > UAS-YippeeRNAi_9_1
pnr-GAL4 > UAS-YippeeRNAi	69	9	2	pnr-GAL4 > UAS-YippeeRNAi_9	pnr-GAL4 > UAS-YippeeRNAi_9_2
pnr-GAL4 > UAS-YippeeRNAi	36	9	3	pnr-GAL4 > UAS-YippeeRNAi_9	pnr-GAL4 > UAS-YippeeRNAi_9_3
pnr-GAL4 > UAS-YippeeRNAi	36	9	4	pnr-GAL4 > UAS-YippeeRNAi_9	pnr-GAL4 > UAS-YippeeRNAi_9_4
pnr-GAL4 > UAS-YippeeRNAi	49	9	5	pnr-GAL4 > UAS-YippeeRNAi_9	pnr-GAL4 > UAS-YippeeRNAi_9_5
pnr-GAL4 > UAS-YippeeRNAi	49	9	6	pnr-GAL4 > UAS-YippeeRNAi_9	pnr-GAL4 > UAS-YippeeRNAi_9_6
pnr-GAL4 > UAS-YippeeRNAi	74	9	7	pnr-GAL4 > UAS-YippeeRNAi_9	pnr-GAL4 > UAS-YippeeRNAi_9_7
pnr-GAL4 > UAS-YippeeRNAi	73	9	8	pnr-GAL4 > UAS-YippeeRNAi_9	pnr-GAL4 > UAS-YippeeRNAi_9_8
pnr-GAL4 > UAS-YippeeRNAi	74	9	9	pnr-GAL4 > UAS-YippeeRNAi_9	pnr-GAL4 > UAS-YippeeRNAi_9_9
pnr-GAL4 > UAS-YippeeRNAi	66	9	10	pnr-GAL4 > UAS-YippeeRNAi_9	pnr-GAL4 > UAS-YippeeRNAi_9_10
pnr-GAL4 > UAS-YippeeRNAi	42	9	11	pnr-GAL4 > UAS-YippeeRNAi_9	pnr-GAL4 > UAS-YippeeRNAi_9_11
pnr-GAL4 > UAS-YippeeRNAi	45	9	12	pnr-GAL4 > UAS-YippeeRNAi_9	pnr-GAL4 > UAS-YippeeRNAi_9_12
pnr-GAL4 > UAS-YippeeRNAi	44	9	13	pnr-GAL4 > UAS-YippeeRNAi_9	pnr-GAL4 > UAS-YippeeRNAi_9_13
pnr-GAL4 > UAS-YippeeRNAi	49	9	14	pnr-GAL4 > UAS-YippeeRNAi_9	pnr-GAL4 > UAS-YippeeRNAi_9_14
pnr-GAL4 > UAS-YippeeRNAi	44	9	15	pnr-GAL4 > UAS-YippeeRNAi_9	pnr-GAL4 > UAS-YippeeRNAi_9_15
pnr-GAL4 > UAS-YippeeRNAi	38	9	16	pnr-GAL4 > UAS-YippeeRNAi_9	pnr-GAL4 > UAS-YippeeRNAi_9_16
pnr-GAL4 > UAS-YippeeRNAi	53	9	17	pnr-GAL4 > UAS-YippeeRNAi_9	pnr-GAL4 > UAS-YippeeRNAi_9_17
pnr-GAL4 > UAS-YippeeRNAi	52	9	18	pnr-GAL4 > UAS-YippeeRNAi_9	pnr-GAL4 > UAS-YippeeRNAi_9_18
pnr-GAL4 > UAS-YippeeRNAi	67	9	19	pnr-GAL4 > UAS-YippeeRNAi_9	pnr-GAL4 > UAS-YippeeRNAi_9_19
pnr-GAL4 > UAS-YippeeRNAi	82	9	20	pnr-GAL4 > UAS-YippeeRNAi_9	pnr-GAL4 > UAS-YippeeRNAi_9_20
pnr-GAL4 > UAS-YippeeRNAi	63	10	1	pnr-GAL4 > UAS-YippeeRNAi_10	pnr-GAL4 > UAS-YippeeRNAi_10_1
pnr-GAL4 > UAS-YippeeRNAi	64	10	2	pnr-GAL4 > UAS-YippeeRNAi_10	pnr-GAL4 > UAS-YippeeRNAi_10_2
pnr-GAL4 > UAS-YippeeRNAi	47	10	3	pnr-GAL4 > UAS-YippeeRNAi_10	pnr-GAL4 > UAS-YippeeRNAi_10_3
pnr-GAL4 > UAS-YippeeRNAi	56	10	4	pnr-GAL4 > UAS-YippeeRNAi_10	pnr-GAL4 > UAS-YippeeRNAi_10_4
pnr-GAL4 > UAS-YippeeRNAi	54	10	5	pnr-GAL4 > UAS-YippeeRNAi_10	pnr-GAL4 > UAS-YippeeRNAi_10_5
pnr-GAL4 > UAS-YippeeRNAi	87	10	6	pnr-GAL4 > UAS-YippeeRNAi_10	pnr-GAL4 > UAS-YippeeRNAi_10_6
pnr-GAL4 > UAS-YippeeRNAi	102	10	7	pnr-GAL4 > UAS-YippeeRNAi_10	pnr-GAL4 > UAS-YippeeRNAi_10_7
pnr-GAL4 > UAS-YippeeRNAi	94	10	8	pnr-GAL4 > UAS-YippeeRNAi_10	pnr-GAL4 > UAS-YippeeRNAi_10_8
pnr-GAL4 > UAS-YippeeRNAi	81	10	9	pnr-GAL4 > UAS-YippeeRNAi_10	pnr-GAL4 > UAS-YippeeRNAi_10_9
pnr-GAL4 > UAS-YippeeRNAi	50	10	10	pnr-GAL4 > UAS-YippeeRNAi_10	pnr-GAL4 > UAS-YippeeRNAi_10_10
pnr-GAL4 > UAS-YippeeRNAi	47	10	11	pnr-GAL4 > UAS-YippeeRNAi_10	pnr-GAL4 > UAS-YippeeRNAi_10_11
pnr-GAL4 > UAS-YippeeRNAi	42	10	12	pnr-GAL4 > UAS-YippeeRNAi_10	pnr-GAL4 > UAS-YippeeRNAi_10_12
pnr-GAL4 > UAS-YippeeRNAi	45	10	13	pnr-GAL4 > UAS-YippeeRNAi_10	pnr-GAL4 > UAS-YippeeRNAi_10_13
pnr-GAL4 > UAS-YippeeRNAi	57	10	14	pnr-GAL4 > UAS-YippeeRNAi_10	pnr-GAL4 > UAS-YippeeRNAi_10_14
pnr-GAL4 > UAS-YippeeRNAi	53	10	15	pnr-GAL4 > UAS-YippeeRNAi_10	pnr-GAL4 > UAS-YippeeRNAi_10_15
pnr-GAL4 > UAS-YippeeRNAi	36	10	16	pnr-GAL4 > UAS-YippeeRNAi_10	pnr-GAL4 > UAS-YippeeRNAi_10_16
pnr-GAL4 > UAS-YippeeRNAi	49	10	17	pnr-GAL4 > UAS-YippeeRNAi_10	pnr-GAL4 > UAS-YippeeRNAi_10_17
pnr-GAL4 > UAS-YippeeRNAi	49	10	18	pnr-GAL4 > UAS-YippeeRNAi_10	pnr-GAL4 > UAS-YippeeRNAi_10_18
pnr-GAL4 > UAS-YippeeRNAi	46	10	19	pnr-GAL4 > UAS-YippeeRNAi_10	pnr-GAL4 > UAS-YippeeRNAi_10_19
pnr-GAL4 > UAS-YippeeRNAi	50	10	20	pnr-GAL4 > UAS-YippeeRNAi_10	pnr-GAL4 > UAS-YippeeRNAi_10_20
pnr-GAL4 > UAS-YippeeRNAi	62	11	1	pnr-GAL4 > UAS-YippeeRNAi_11	pnr-GAL4 > UAS-YippeeRNAi_11_1
pnr-GAL4 > UAS-YippeeRNAi	62	11	2	pnr-GAL4 > UAS-YippeeRNAi_11	pnr-GAL4 > UAS-YippeeRNAi_11_2
pnr-GAL4 > UAS-YippeeRNAi	60	11	3	pnr-GAL4 > UAS-YippeeRNAi_11	pnr-GAL4 > UAS-YippeeRNAi_11_3
pnr-GAL4 > UAS-YippeeRNAi	61	11	4	pnr-GAL4 > UAS-YippeeRNAi_11	pnr-GAL4 > UAS-YippeeRNAi_11_4
pnr-GAL4 > UAS-YippeeRNAi	62	11	5	pnr-GAL4 > UAS-YippeeRNAi_11	pnr-GAL4 > UAS-YippeeRNAi_11_5
pnr-GAL4 > UAS-YippeeRNAi	59	11	6	pnr-GAL4 > UAS-YippeeRNAi_11	pnr-GAL4 > UAS-YippeeRNAi_11_6
pnr-GAL4 > UAS-YippeeRNAi	87	11	7	pnr-GAL4 > UAS-YippeeRNAi_11	pnr-GAL4 > UAS-YippeeRNAi_11_7
pnr-GAL4 > UAS-YippeeRNAi	96	11	8	pnr-GAL4 > UAS-YippeeRNAi_11	pnr-GAL4 > UAS-YippeeRNAi_11_8
pnr-GAL4 > UAS-YippeeRNAi	86	11	9	pnr-GAL4 > UAS-YippeeRNAi_11	pnr-GAL4 > UAS-YippeeRNAi_11_9
pnr-GAL4 > UAS-YippeeRNAi	84	11	10	pnr-GAL4 > UAS-YippeeRNAi_11	pnr-GAL4 > UAS-YippeeRNAi_11_10
pnr-GAL4 > UAS-YippeeRNAi	51	11	11	pnr-GAL4 > UAS-YippeeRNAi_11	pnr-GAL4 > UAS-YippeeRNAi_11_11
pnr-GAL4 > UAS-YippeeRNAi	43	11	12	pnr-GAL4 > UAS-YippeeRNAi_11	pnr-GAL4 > UAS-YippeeRNAi_11_12
pnr-GAL4 > UAS-YippeeRNAi	45	11	13	pnr-GAL4 > UAS-YippeeRNAi_11	pnr-GAL4 > UAS-YippeeRNAi_11_13
pnr-GAL4 > UAS-YippeeRNAi	45	11	14	pnr-GAL4 > UAS-YippeeRNAi_11	pnr-GAL4 > UAS-YippeeRNAi_11_14
pnr-GAL4 > UAS-YippeeRNAi	45	11	15	pnr-GAL4 > UAS-YippeeRNAi_11	pnr-GAL4 > UAS-YippeeRNAi_11_15
pnr-GAL4 > UAS-YippeeRNAi	44	11	16	pnr-GAL4 > UAS-YippeeRNAi_11	pnr-GAL4 > UAS-YippeeRNAi_11_16
pnr-GAL4 > UAS-YippeeRNAi	47	11	17	pnr-GAL4 > UAS-YippeeRNAi_11	pnr-GAL4 > UAS-YippeeRNAi_11_17
pnr-GAL4 > UAS-YippeeRNAi	44	11	18	pnr-GAL4 > UAS-YippeeRNAi_11	pnr-GAL4 > UAS-YippeeRNAi_11_18
pnr-GAL4 > UAS-YippeeRNAi	53	11	19	pnr-GAL4 > UAS-YippeeRNAi_11	pnr-GAL4 > UAS-YippeeRNAi_11_19
pnr-GAL4 > UAS-YippeeRNAi	53	11	20	pnr-GAL4 > UAS-YippeeRNAi_11	pnr-GAL4 > UAS-YippeeRNAi_11_20
pnr-GAL4 > UAS-YippeeRNAi	76	12	1	pnr-GAL4 > UAS-YippeeRNAi_12	pnr-GAL4 > UAS-YippeeRNAi_12_1
pnr-GAL4 > UAS-YippeeRNAi	62	12	2	pnr-GAL4 > UAS-YippeeRNAi_12	pnr-GAL4 > UAS-YippeeRNAi_12_2
pnr-GAL4 > UAS-YippeeRNAi	63	12	3	pnr-GAL4 > UAS-YippeeRNAi_12	pnr-GAL4 > UAS-YippeeRNAi_12_3
pnr-GAL4 > UAS-YippeeRNAi	49	12	4	pnr-GAL4 > UAS-YippeeRNAi_12	pnr-GAL4 > UAS-YippeeRNAi_12_4
pnr-GAL4 > UAS-YippeeRNAi	84	12	5	pnr-GAL4 > UAS-YippeeRNAi_12	pnr-GAL4 > UAS-YippeeRNAi_12_5
pnr-GAL4 > UAS-YippeeRNAi	81	12	6	pnr-GAL4 > UAS-YippeeRNAi_12	pnr-GAL4 > UAS-YippeeRNAi_12_6
pnr-GAL4 > UAS-YippeeRNAi	92	12	7	pnr-GAL4 > UAS-YippeeRNAi_12	pnr-GAL4 > UAS-YippeeRNAi_12_7
pnr-GAL4 > UAS-YippeeRNAi	73	12	8	pnr-GAL4 > UAS-YippeeRNAi_12	pnr-GAL4 > UAS-YippeeRNAi_12_8
pnr-GAL4 > UAS-YippeeRNAi	57	12	9	pnr-GAL4 > UAS-YippeeRNAi_12	pnr-GAL4 > UAS-YippeeRNAi_12_9
pnr-GAL4 > UAS-YippeeRNAi	42	12	10	pnr-GAL4 > UAS-YippeeRNAi_12	pnr-GAL4 > UAS-YippeeRNAi_12_10
pnr-GAL4 > UAS-YippeeRNAi	41	12	11	pnr-GAL4 > UAS-YippeeRNAi_12	pnr-GAL4 > UAS-YippeeRNAi_12_11
pnr-GAL4 > UAS-YippeeRNAi	37	12	12	pnr-GAL4 > UAS-YippeeRNAi_12	pnr-GAL4 > UAS-YippeeRNAi_12_12
pnr-GAL4 > UAS-YippeeRNAi	40	12	13	pnr-GAL4 > UAS-YippeeRNAi_12	pnr-GAL4 > UAS-YippeeRNAi_12_13
pnr-GAL4 > UAS-YippeeRNAi	41	12	14	pnr-GAL4 > UAS-YippeeRNAi_12	pnr-GAL4 > UAS-YippeeRNAi_12_14
pnr-GAL4 > UAS-YippeeRNAi	47	12	15	pnr-GAL4 > UAS-YippeeRNAi_12	pnr-GAL4 > UAS-YippeeRNAi_12_15
pnr-GAL4 > UAS-YippeeRNAi	47	12	16	pnr-GAL4 > UAS-YippeeRNAi_12	pnr-GAL4 > UAS-YippeeRNAi_12_16
pnr-GAL4 > UAS-YippeeRNAi	35	12	17	pnr-GAL4 > UAS-YippeeRNAi_12	pnr-GAL4 > UAS-YippeeRNAi_12_17
pnr-GAL4 > UAS-YippeeRNAi	61	12	18	pnr-GAL4 > UAS-YippeeRNAi_12	pnr-GAL4 > UAS-YippeeRNAi_12_18
pnr-GAL4 > UAS-YippeeRNAi	75	12	19	pnr-GAL4 > UAS-YippeeRNAi_12	pnr-GAL4 > UAS-YippeeRNAi_12_19
pnr-GAL4 > UAS-YippeeRNAi	80	12	20	pnr-GAL4 > UAS-YippeeRNAi_12	pnr-GAL4 > UAS-YippeeRNAi_12_20
pnr-GAL4 > UAS-YippeeRNAi	45	13	1	pnr-GAL4 > UAS-YippeeRNAi_13	pnr-GAL4 > UAS-YippeeRNAi_13_1
pnr-GAL4 > UAS-YippeeRNAi	51	13	2	pnr-GAL4 > UAS-YippeeRNAi_13	pnr-GAL4 > UAS-YippeeRNAi_13_2
pnr-GAL4 > UAS-YippeeRNAi	43	13	3	pnr-GAL4 > UAS-YippeeRNAi_13	pnr-GAL4 > UAS-YippeeRNAi_13_3
pnr-GAL4 > UAS-YippeeRNAi	39	13	4	pnr-GAL4 > UAS-YippeeRNAi_13	pnr-GAL4 > UAS-YippeeRNAi_13_4
pnr-GAL4 > UAS-YippeeRNAi	75	13	5	pnr-GAL4 > UAS-YippeeRNAi_13	pnr-GAL4 > UAS-YippeeRNAi_13_5
pnr-GAL4 > UAS-YippeeRNAi	70	13	6	pnr-GAL4 > UAS-YippeeRNAi_13	pnr-GAL4 > UAS-YippeeRNAi_13_6
pnr-GAL4 > UAS-YippeeRNAi	55	13	7	pnr-GAL4 > UAS-YippeeRNAi_13	pnr-GAL4 > UAS-YippeeRNAi_13_7
pnr-GAL4 > UAS-YippeeRNAi	44	13	8	pnr-GAL4 > UAS-YippeeRNAi_13	pnr-GAL4 > UAS-YippeeRNAi_13_8
pnr-GAL4 > UAS-YippeeRNAi	47	13	9	pnr-GAL4 > UAS-YippeeRNAi_13	pnr-GAL4 > UAS-YippeeRNAi_13_9
pnr-GAL4 > UAS-YippeeRNAi	53	13	10	pnr-GAL4 > UAS-YippeeRNAi_13	pnr-GAL4 > UAS-YippeeRNAi_13_10
pnr-GAL4 > UAS-YippeeRNAi	54	13	11	pnr-GAL4 > UAS-YippeeRNAi_13	pnr-GAL4 > UAS-YippeeRNAi_13_11
pnr-GAL4 > UAS-YippeeRNAi	41	13	12	pnr-GAL4 > UAS-YippeeRNAi_13	pnr-GAL4 > UAS-YippeeRNAi_13_12
pnr-GAL4 > UAS-YippeeRNAi	46	13	13	pnr-GAL4 > UAS-YippeeRNAi_13	pnr-GAL4 > UAS-YippeeRNAi_13_13
pnr-GAL4 > UAS-YippeeRNAi	48	13	14	pnr-GAL4 > UAS-YippeeRNAi_13	pnr-GAL4 > UAS-YippeeRNAi_13_14
pnr-GAL4 > UAS-YippeeRNAi	40	13	15	pnr-GAL4 > UAS-YippeeRNAi_13	pnr-GAL4 > UAS-YippeeRNAi_13_15
pnr-GAL4 > UAS-YippeeRNAi	57	13	16	pnr-GAL4 > UAS-YippeeRNAi_13	pnr-GAL4 > UAS-YippeeRNAi_13_16
pnr-GAL4 > UAS-YippeeRNAi	57	13	17	pnr-GAL4 > UAS-YippeeRNAi_13	pnr-GAL4 > UAS-YippeeRNAi_13_17
pnr-GAL4 > UAS-YippeeRNAi	50	13	18	pnr-GAL4 > UAS-YippeeRNAi_13	pnr-GAL4 > UAS-YippeeRNAi_13_18
pnr-GAL4 > UAS-YippeeRNAi	53	13	19	pnr-GAL4 > UAS-YippeeRNAi_13	pnr-GAL4 > UAS-YippeeRNAi_13_19
pnr-GAL4 > UAS-YippeeRNAi	54	13	20	pnr-GAL4 > UAS-YippeeRNAi_13	pnr-GAL4 > UAS-YippeeRNAi_13_20
pnr-GAL4 > UAS-YippeeRNAi	80	14	1	pnr-GAL4 > UAS-YippeeRNAi_14	pnr-GAL4 > UAS-YippeeRNAi_14_1
pnr-GAL4 > UAS-YippeeRNAi	69	14	2	pnr-GAL4 > UAS-YippeeRNAi_14	pnr-GAL4 > UAS-YippeeRNAi_14_2
pnr-GAL4 > UAS-YippeeRNAi	63	14	3	pnr-GAL4 > UAS-YippeeRNAi_14	pnr-GAL4 > UAS-YippeeRNAi_14_3
pnr-GAL4 > UAS-YippeeRNAi	67	14	4	pnr-GAL4 > UAS-YippeeRNAi_14	pnr-GAL4 > UAS-YippeeRNAi_14_4
pnr-GAL4 > UAS-YippeeRNAi	81	14	5	pnr-GAL4 > UAS-YippeeRNAi_14	pnr-GAL4 > UAS-YippeeRNAi_14_5
pnr-GAL4 > UAS-YippeeRNAi	101	14	6	pnr-GAL4 > UAS-YippeeRNAi_14	pnr-GAL4 > UAS-YippeeRNAi_14_6
pnr-GAL4 > UAS-YippeeRNAi	100	14	7	pnr-GAL4 > UAS-YippeeRNAi_14	pnr-GAL4 > UAS-YippeeRNAi_14_7
pnr-GAL4 > UAS-YippeeRNAi	93	14	8	pnr-GAL4 > UAS-YippeeRNAi_14	pnr-GAL4 > UAS-YippeeRNAi_14_8
pnr-GAL4 > UAS-YippeeRNAi	85	14	9	pnr-GAL4 > UAS-YippeeRNAi_14	pnr-GAL4 > UAS-YippeeRNAi_14_9
pnr-GAL4 > UAS-YippeeRNAi	67	14	10	pnr-GAL4 > UAS-YippeeRNAi_14	pnr-GAL4 > UAS-YippeeRNAi_14_10
pnr-GAL4 > UAS-YippeeRNAi	60	14	11	pnr-GAL4 > UAS-YippeeRNAi_14	pnr-GAL4 > UAS-YippeeRNAi_14_11
pnr-GAL4 > UAS-YippeeRNAi	49	14	12	pnr-GAL4 > UAS-YippeeRNAi_14	pnr-GAL4 > UAS-YippeeRNAi_14_12
pnr-GAL4 > UAS-YippeeRNAi	52	14	13	pnr-GAL4 > UAS-YippeeRNAi_14	pnr-GAL4 > UAS-YippeeRNAi_14_13
pnr-GAL4 > UAS-YippeeRNAi	44	14	14	pnr-GAL4 > UAS-YippeeRNAi_14	pnr-GAL4 > UAS-YippeeRNAi_14_14
pnr-GAL4 > UAS-YippeeRNAi	45	14	15	pnr-GAL4 > UAS-YippeeRNAi_14	pnr-GAL4 > UAS-YippeeRNAi_14_15
pnr-GAL4 > UAS-YippeeRNAi	51	14	16	pnr-GAL4 > UAS-YippeeRNAi_14	pnr-GAL4 > UAS-YippeeRNAi_14_16
pnr-GAL4 > UAS-YippeeRNAi	53	14	17	pnr-GAL4 > UAS-YippeeRNAi_14	pnr-GAL4 > UAS-YippeeRNAi_14_17
pnr-GAL4 > UAS-YippeeRNAi	49	14	18	pnr-GAL4 > UAS-YippeeRNAi_14	pnr-GAL4 > UAS-YippeeRNAi_14_18
pnr-GAL4 > UAS-YippeeRNAi	92	14	19	pnr-GAL4 > UAS-YippeeRNAi_14	pnr-GAL4 > UAS-YippeeRNAi_14_19
pnr-GAL4 > UAS-YippeeRNAi	97	14	20	pnr-GAL4 > UAS-YippeeRNAi_14	pnr-GAL4 > UAS-YippeeRNAi_14_20
pnr-GAL4 > UAS-YippeeRNAi	38	15	1	pnr-GAL4 > UAS-YippeeRNAi_15	pnr-GAL4 > UAS-YippeeRNAi_15_1
pnr-GAL4 > UAS-YippeeRNAi	52	15	2	pnr-GAL4 > UAS-YippeeRNAi_15	pnr-GAL4 > UAS-YippeeRNAi_15_2
pnr-GAL4 > UAS-YippeeRNAi	47	15	3	pnr-GAL4 > UAS-YippeeRNAi_15	pnr-GAL4 > UAS-YippeeRNAi_15_3
pnr-GAL4 > UAS-YippeeRNAi	59	15	4	pnr-GAL4 > UAS-YippeeRNAi_15	pnr-GAL4 > UAS-YippeeRNAi_15_4
pnr-GAL4 > UAS-YippeeRNAi	74	15	5	pnr-GAL4 > UAS-YippeeRNAi_15	pnr-GAL4 > UAS-YippeeRNAi_15_5
pnr-GAL4 > UAS-YippeeRNAi	93	15	6	pnr-GAL4 > UAS-YippeeRNAi_15	pnr-GAL4 > UAS-YippeeRNAi_15_6
pnr-GAL4 > UAS-YippeeRNAi	68	15	7	pnr-GAL4 > UAS-YippeeRNAi_15	pnr-GAL4 > UAS-YippeeRNAi_15_7
pnr-GAL4 > UAS-YippeeRNAi	36	15	8	pnr-GAL4 > UAS-YippeeRNAi_15	pnr-GAL4 > UAS-YippeeRNAi_15_8
pnr-GAL4 > UAS-YippeeRNAi	67	15	9	pnr-GAL4 > UAS-YippeeRNAi_15	pnr-GAL4 > UAS-YippeeRNAi_15_9
pnr-GAL4 > UAS-YippeeRNAi	60	15	10	pnr-GAL4 > UAS-YippeeRNAi_15	pnr-GAL4 > UAS-YippeeRNAi_15_10
pnr-GAL4 > UAS-YippeeRNAi	40	15	11	pnr-GAL4 > UAS-YippeeRNAi_15	pnr-GAL4 > UAS-YippeeRNAi_15_11
pnr-GAL4 > UAS-YippeeRNAi	51	15	12	pnr-GAL4 > UAS-YippeeRNAi_15	pnr-GAL4 > UAS-YippeeRNAi_15_12
pnr-GAL4 > UAS-YippeeRNAi	48	15	13	pnr-GAL4 > UAS-YippeeRNAi_15	pnr-GAL4 > UAS-YippeeRNAi_15_13
pnr-GAL4 > UAS-YippeeRNAi	52	15	14	pnr-GAL4 > UAS-YippeeRNAi_15	pnr-GAL4 > UAS-YippeeRNAi_15_14
pnr-GAL4 > UAS-YippeeRNAi	54	15	15	pnr-GAL4 > UAS-YippeeRNAi_15	pnr-GAL4 > UAS-YippeeRNAi_15_15
pnr-GAL4 > UAS-YippeeRNAi	43	15	16	pnr-GAL4 > UAS-YippeeRNAi_15	pnr-GAL4 > UAS-YippeeRNAi_15_16
pnr-GAL4 > UAS-YippeeRNAi	77	15	17	pnr-GAL4 > UAS-YippeeRNAi_15	pnr-GAL4 > UAS-YippeeRNAi_15_17
pnr-GAL4 > UAS-YippeeRNAi	57	15	18	pnr-GAL4 > UAS-YippeeRNAi_15	pnr-GAL4 > UAS-YippeeRNAi_15_18
pnr-GAL4 > UAS-YippeeRNAi	57	15	19	pnr-GAL4 > UAS-YippeeRNAi_15	pnr-GAL4 > UAS-YippeeRNAi_15_19
pnr-GAL4 > UAS-YippeeRNAi	55	15	20	pnr-GAL4 > UAS-YippeeRNAi_15	pnr-GAL4 > UAS-YippeeRNAi_15_20
elav-GAL4	84	1	1	elav-GAL4_1	elav-GAL4_1_1
elav-GAL4	95	1	2	elav-GAL4_1	elav-GAL4_1_2
elav-GAL4	92	1	3	elav-GAL4_1	elav-GAL4_1_3
elav-GAL4	98	1	4	elav-GAL4_1	elav-GAL4_1_4
elav-GAL4	83	1	5	elav-GAL4_1	elav-GAL4_1_5
elav-GAL4	84	1	6	elav-GAL4_1	elav-GAL4_1_6
elav-GAL4	83	1	7	elav-GAL4_1	elav-GAL4_1_7
elav-GAL4	84	1	8	elav-GAL4_1	elav-GAL4_1_8
elav-GAL4	66	1	9	elav-GAL4_1	elav-GAL4_1_9
elav-GAL4	82	1	10	elav-GAL4_1	elav-GAL4_1_10
elav-GAL4	82	1	11	elav-GAL4_1	elav-GAL4_1_11
elav-GAL4	86	1	12	elav-GAL4_1	elav-GAL4_1_12
elav-GAL4	86	1	13	elav-GAL4_1	elav-GAL4_1_13
elav-GAL4	83	1	14	elav-GAL4_1	elav-GAL4_1_14
elav-GAL4	104	1	15	elav-GAL4_1	elav-GAL4_1_15
elav-GAL4	104	1	16	elav-GAL4_1	elav-GAL4_1_16
elav-GAL4	81	1	17	elav-GAL4_1	elav-GAL4_1_17
elav-GAL4	90	1	18	elav-GAL4_1	elav-GAL4_1_18
elav-GAL4	80	1	19	elav-GAL4_1	elav-GAL4_1_19
elav-GAL4	77	1	20	elav-GAL4_1	elav-GAL4_1_20
elav-GAL4	93	2	1	elav-GAL4_2	elav-GAL4_2_1
elav-GAL4	78	2	2	elav-GAL4_2	elav-GAL4_2_2
elav-GAL4	82	2	3	elav-GAL4_2	elav-GAL4_2_3
elav-GAL4	93	2	4	elav-GAL4_2	elav-GAL4_2_4
elav-GAL4	78	2	5	elav-GAL4_2	elav-GAL4_2_5
elav-GAL4	83	2	6	elav-GAL4_2	elav-GAL4_2_6
elav-GAL4	95	2	7	elav-GAL4_2	elav-GAL4_2_7
elav-GAL4	91	2	8	elav-GAL4_2	elav-GAL4_2_8
elav-GAL4	96	2	9	elav-GAL4_2	elav-GAL4_2_9
elav-GAL4	89	2	10	elav-GAL4_2	elav-GAL4_2_10
elav-GAL4	90	2	11	elav-GAL4_2	elav-GAL4_2_11
elav-GAL4	100	2	12	elav-GAL4_2	elav-GAL4_2_12
elav-GAL4	66	2	13	elav-GAL4_2	elav-GAL4_2_13
elav-GAL4	93	2	14	elav-GAL4_2	elav-GAL4_2_14
elav-GAL4	86	2	15	elav-GAL4_2	elav-GAL4_2_15
elav-GAL4	87	2	16	elav-GAL4_2	elav-GAL4_2_16
elav-GAL4	74	2	17	elav-GAL4_2	elav-GAL4_2_17
elav-GAL4	81	2	18	elav-GAL4_2	elav-GAL4_2_18
elav-GAL4	96	2	19	elav-GAL4_2	elav-GAL4_2_19
elav-GAL4	93	2	20	elav-GAL4_2	elav-GAL4_2_20
elav-GAL4	98	3	1	elav-GAL4_3	elav-GAL4_3_1
elav-GAL4	95	3	2	elav-GAL4_3	elav-GAL4_3_2
elav-GAL4	71	3	3	elav-GAL4_3	elav-GAL4_3_3
elav-GAL4	98	3	4	elav-GAL4_3	elav-GAL4_3_4
elav-GAL4	92	3	5	elav-GAL4_3	elav-GAL4_3_5
elav-GAL4	77	3	6	elav-GAL4_3	elav-GAL4_3_6
elav-GAL4	83	3	7	elav-GAL4_3	elav-GAL4_3_7
elav-GAL4	100	3	8	elav-GAL4_3	elav-GAL4_3_8
elav-GAL4	79	3	9	elav-GAL4_3	elav-GAL4_3_9
elav-GAL4	85	3	10	elav-GAL4_3	elav-GAL4_3_10
elav-GAL4	88	3	11	elav-GAL4_3	elav-GAL4_3_11
elav-GAL4	108	3	12	elav-GAL4_3	elav-GAL4_3_12
elav-GAL4	97	3	13	elav-GAL4_3	elav-GAL4_3_13
elav-GAL4	93	3	14	elav-GAL4_3	elav-GAL4_3_14
elav-GAL4	108	3	15	elav-GAL4_3	elav-GAL4_3_15
elav-GAL4	83	3	16	elav-GAL4_3	elav-GAL4_3_16
elav-GAL4	99	3	17	elav-GAL4_3	elav-GAL4_3_17
elav-GAL4	95	3	18	elav-GAL4_3	elav-GAL4_3_18
elav-GAL4	78	3	19	elav-GAL4_3	elav-GAL4_3_19
elav-GAL4	99	3	20	elav-GAL4_3	elav-GAL4_3_20
elav-GAL4	90	4	1	elav-GAL4_4	elav-GAL4_4_1
elav-GAL4	94	4	2	elav-GAL4_4	elav-GAL4_4_2
elav-GAL4	90	4	3	elav-GAL4_4	elav-GAL4_4_3
elav-GAL4	97	4	4	elav-GAL4_4	elav-GAL4_4_4
elav-GAL4	85	4	5	elav-GAL4_4	elav-GAL4_4_5
elav-GAL4	97	4	6	elav-GAL4_4	elav-GAL4_4_6
elav-GAL4	105	4	7	elav-GAL4_4	elav-GAL4_4_7
elav-GAL4	101	4	8	elav-GAL4_4	elav-GAL4_4_8
elav-GAL4	96	4	9	elav-GAL4_4	elav-GAL4_4_9
elav-GAL4	94	4	10	elav-GAL4_4	elav-GAL4_4_10
elav-GAL4	85	4	11	elav-GAL4_4	elav-GAL4_4_11
elav-GAL4	96	4	12	elav-GAL4_4	elav-GAL4_4_12
elav-GAL4	89	4	13	elav-GAL4_4	elav-GAL4_4_13
elav-GAL4	91	4	14	elav-GAL4_4	elav-GAL4_4_14
elav-GAL4	91	4	15	elav-GAL4_4	elav-GAL4_4_15
elav-GAL4	92	4	16	elav-GAL4_4	elav-GAL4_4_16
elav-GAL4	80	4	17	elav-GAL4_4	elav-GAL4_4_17
elav-GAL4	93	4	18	elav-GAL4_4	elav-GAL4_4_18
elav-GAL4	94	4	19	elav-GAL4_4	elav-GAL4_4_19
elav-GAL4	87	4	20	elav-GAL4_4	elav-GAL4_4_20
elav-GAL4	78	5	1	elav-GAL4_5	elav-GAL4_5_1
elav-GAL4	80	5	2	elav-GAL4_5	elav-GAL4_5_2
elav-GAL4	75	5	3	elav-GAL4_5	elav-GAL4_5_3
elav-GAL4	75	5	4	elav-GAL4_5	elav-GAL4_5_4
elav-GAL4	78	5	5	elav-GAL4_5	elav-GAL4_5_5
elav-GAL4	78	5	6	elav-GAL4_5	elav-GAL4_5_6
elav-GAL4	85	5	7	elav-GAL4_5	elav-GAL4_5_7
elav-GAL4	84	5	8	elav-GAL4_5	elav-GAL4_5_8
elav-GAL4	87	5	9	elav-GAL4_5	elav-GAL4_5_9
elav-GAL4	78	5	10	elav-GAL4_5	elav-GAL4_5_10
elav-GAL4	72	5	11	elav-GAL4_5	elav-GAL4_5_11
elav-GAL4	77	5	12	elav-GAL4_5	elav-GAL4_5_12
elav-GAL4	79	5	13	elav-GAL4_5	elav-GAL4_5_13
elav-GAL4	68	5	14	elav-GAL4_5	elav-GAL4_5_14
elav-GAL4	75	5	15	elav-GAL4_5	elav-GAL4_5_15
elav-GAL4	72	5	16	elav-GAL4_5	elav-GAL4_5_16
elav-GAL4	71	5	17	elav-GAL4_5	elav-GAL4_5_17
elav-GAL4	82	5	18	elav-GAL4_5	elav-GAL4_5_18
elav-GAL4	66	5	19	elav-GAL4_5	elav-GAL4_5_19
elav-GAL4	72	5	20	elav-GAL4_5	elav-GAL4_5_20
elav-GAL4	84	6	1	elav-GAL4_6	elav-GAL4_6_1
elav-GAL4	97	6	2	elav-GAL4_6	elav-GAL4_6_2
elav-GAL4	118	6	3	elav-GAL4_6	elav-GAL4_6_3
elav-GAL4	113	6	4	elav-GAL4_6	elav-GAL4_6_4
elav-GAL4	114	6	5	elav-GAL4_6	elav-GAL4_6_5
elav-GAL4	97	6	6	elav-GAL4_6	elav-GAL4_6_6
elav-GAL4	108	6	7	elav-GAL4_6	elav-GAL4_6_7
elav-GAL4	103	6	8	elav-GAL4_6	elav-GAL4_6_8
elav-GAL4	92	6	9	elav-GAL4_6	elav-GAL4_6_9
elav-GAL4	108	6	10	elav-GAL4_6	elav-GAL4_6_10
elav-GAL4	103	6	11	elav-GAL4_6	elav-GAL4_6_11
elav-GAL4	117	6	12	elav-GAL4_6	elav-GAL4_6_12
elav-GAL4	106	6	13	elav-GAL4_6	elav-GAL4_6_13
elav-GAL4	109	6	14	elav-GAL4_6	elav-GAL4_6_14
elav-GAL4	114	6	15	elav-GAL4_6	elav-GAL4_6_15
elav-GAL4	106	6	16	elav-GAL4_6	elav-GAL4_6_16
elav-GAL4	102	6	17	elav-GAL4_6	elav-GAL4_6_17
elav-GAL4	97	6	18	elav-GAL4_6	elav-GAL4_6_18
elav-GAL4	92	6	19	elav-GAL4_6	elav-GAL4_6_19
elav-GAL4	95	6	20	elav-GAL4_6	elav-GAL4_6_20
elav-GAL4	84	7	1	elav-GAL4_7	elav-GAL4_7_1
elav-GAL4	77	7	2	elav-GAL4_7	elav-GAL4_7_2
elav-GAL4	73	7	3	elav-GAL4_7	elav-GAL4_7_3
elav-GAL4	74	7	4	elav-GAL4_7	elav-GAL4_7_4
elav-GAL4	79	7	5	elav-GAL4_7	elav-GAL4_7_5
elav-GAL4	68	7	6	elav-GAL4_7	elav-GAL4_7_6
elav-GAL4	85	7	7	elav-GAL4_7	elav-GAL4_7_7
elav-GAL4	79	7	8	elav-GAL4_7	elav-GAL4_7_8
elav-GAL4	80	7	9	elav-GAL4_7	elav-GAL4_7_9
elav-GAL4	78	7	10	elav-GAL4_7	elav-GAL4_7_10
elav-GAL4	81	7	11	elav-GAL4_7	elav-GAL4_7_11
elav-GAL4	84	7	12	elav-GAL4_7	elav-GAL4_7_12
elav-GAL4	67	7	13	elav-GAL4_7	elav-GAL4_7_13
elav-GAL4	85	7	14	elav-GAL4_7	elav-GAL4_7_14
elav-GAL4	77	7	15	elav-GAL4_7	elav-GAL4_7_15
elav-GAL4	78	7	16	elav-GAL4_7	elav-GAL4_7_16
elav-GAL4	83	7	17	elav-GAL4_7	elav-GAL4_7_17
elav-GAL4	77	7	18	elav-GAL4_7	elav-GAL4_7_18
elav-GAL4	79	7	19	elav-GAL4_7	elav-GAL4_7_19
elav-GAL4	84	7	20	elav-GAL4_7	elav-GAL4_7_20
elav-GAL4	87	8	1	elav-GAL4_8	elav-GAL4_8_1
elav-GAL4	70	8	2	elav-GAL4_8	elav-GAL4_8_2
elav-GAL4	83	8	3	elav-GAL4_8	elav-GAL4_8_3
elav-GAL4	83	8	4	elav-GAL4_8	elav-GAL4_8_4
elav-GAL4	81	8	5	elav-GAL4_8	elav-GAL4_8_5
elav-GAL4	85	8	6	elav-GAL4_8	elav-GAL4_8_6
elav-GAL4	86	8	7	elav-GAL4_8	elav-GAL4_8_7
elav-GAL4	81	8	8	elav-GAL4_8	elav-GAL4_8_8
elav-GAL4	88	8	9	elav-GAL4_8	elav-GAL4_8_9
elav-GAL4	83	8	10	elav-GAL4_8	elav-GAL4_8_10
elav-GAL4	78	8	11	elav-GAL4_8	elav-GAL4_8_11
elav-GAL4	76	8	12	elav-GAL4_8	elav-GAL4_8_12
elav-GAL4	92	8	13	elav-GAL4_8	elav-GAL4_8_13
elav-GAL4	84	8	14	elav-GAL4_8	elav-GAL4_8_14
elav-GAL4	77	8	15	elav-GAL4_8	elav-GAL4_8_15
elav-GAL4	67	8	16	elav-GAL4_8	elav-GAL4_8_16
elav-GAL4	82	8	17	elav-GAL4_8	elav-GAL4_8_17
elav-GAL4	83	8	18	elav-GAL4_8	elav-GAL4_8_18
elav-GAL4	87	8	19	elav-GAL4_8	elav-GAL4_8_19
elav-GAL4	90	8	20	elav-GAL4_8	elav-GAL4_8_20
elav-GAL4	73	9	1	elav-GAL4_9	elav-GAL4_9_1
elav-GAL4	91	9	2	elav-GAL4_9	elav-GAL4_9_2
elav-GAL4	102	9	3	elav-GAL4_9	elav-GAL4_9_3
elav-GAL4	104	9	4	elav-GAL4_9	elav-GAL4_9_4
elav-GAL4	120	9	5	elav-GAL4_9	elav-GAL4_9_5
elav-GAL4	107	9	6	elav-GAL4_9	elav-GAL4_9_6
elav-GAL4	98	9	7	elav-GAL4_9	elav-GAL4_9_7
elav-GAL4	106	9	8	elav-GAL4_9	elav-GAL4_9_8
elav-GAL4	106	9	9	elav-GAL4_9	elav-GAL4_9_9
elav-GAL4	110	9	10	elav-GAL4_9	elav-GAL4_9_10
elav-GAL4	102	9	11	elav-GAL4_9	elav-GAL4_9_11
elav-GAL4	87	9	12	elav-GAL4_9	elav-GAL4_9_12
elav-GAL4	107	9	13	elav-GAL4_9	elav-GAL4_9_13
elav-GAL4	103	9	14	elav-GAL4_9	elav-GAL4_9_14
elav-GAL4	96	9	15	elav-GAL4_9	elav-GAL4_9_15
elav-GAL4	97	9	16	elav-GAL4_9	elav-GAL4_9_16
elav-GAL4	95	9	17	elav-GAL4_9	elav-GAL4_9_17
elav-GAL4	105	9	18	elav-GAL4_9	elav-GAL4_9_18
elav-GAL4	115	9	19	elav-GAL4_9	elav-GAL4_9_19
elav-GAL4	107	9	20	elav-GAL4_9	elav-GAL4_9_20
elav-GAL4	84	10	1	elav-GAL4_10	elav-GAL4_10_1
elav-GAL4	76	10	2	elav-GAL4_10	elav-GAL4_10_2
elav-GAL4	90	10	3	elav-GAL4_10	elav-GAL4_10_3
elav-GAL4	101	10	4	elav-GAL4_10	elav-GAL4_10_4
elav-GAL4	102	10	5	elav-GAL4_10	elav-GAL4_10_5
elav-GAL4	99	10	6	elav-GAL4_10	elav-GAL4_10_6
elav-GAL4	103	10	7	elav-GAL4_10	elav-GAL4_10_7
elav-GAL4	93	10	8	elav-GAL4_10	elav-GAL4_10_8
elav-GAL4	94	10	9	elav-GAL4_10	elav-GAL4_10_9
elav-GAL4	95	10	10	elav-GAL4_10	elav-GAL4_10_10
elav-GAL4	95	10	11	elav-GAL4_10	elav-GAL4_10_11
elav-GAL4	92	10	12	elav-GAL4_10	elav-GAL4_10_12
elav-GAL4	101	10	13	elav-GAL4_10	elav-GAL4_10_13
elav-GAL4	98	10	14	elav-GAL4_10	elav-GAL4_10_14
elav-GAL4	89	10	15	elav-GAL4_10	elav-GAL4_10_15
elav-GAL4	77	10	16	elav-GAL4_10	elav-GAL4_10_16
elav-GAL4	81	10	17	elav-GAL4_10	elav-GAL4_10_17
elav-GAL4	102	10	18	elav-GAL4_10	elav-GAL4_10_18
elav-GAL4	73	10	19	elav-GAL4_10	elav-GAL4_10_19
elav-GAL4	86	10	20	elav-GAL4_10	elav-GAL4_10_20
elav-GAL4	90	11	1	elav-GAL4_11	elav-GAL4_11_1
elav-GAL4	100	11	2	elav-GAL4_11	elav-GAL4_11_2
elav-GAL4	97	11	3	elav-GAL4_11	elav-GAL4_11_3
elav-GAL4	101	11	4	elav-GAL4_11	elav-GAL4_11_4
elav-GAL4	95	11	5	elav-GAL4_11	elav-GAL4_11_5
elav-GAL4	93	11	6	elav-GAL4_11	elav-GAL4_11_6
elav-GAL4	95	11	7	elav-GAL4_11	elav-GAL4_11_7
elav-GAL4	103	11	8	elav-GAL4_11	elav-GAL4_11_8
elav-GAL4	97	11	9	elav-GAL4_11	elav-GAL4_11_9
elav-GAL4	93	11	10	elav-GAL4_11	elav-GAL4_11_10
elav-GAL4	80	11	11	elav-GAL4_11	elav-GAL4_11_11
elav-GAL4	90	11	12	elav-GAL4_11	elav-GAL4_11_12
elav-GAL4	100	11	13	elav-GAL4_11	elav-GAL4_11_13
elav-GAL4	94	11	14	elav-GAL4_11	elav-GAL4_11_14
elav-GAL4	89	11	15	elav-GAL4_11	elav-GAL4_11_15
elav-GAL4	103	11	16	elav-GAL4_11	elav-GAL4_11_16
elav-GAL4	95	11	17	elav-GAL4_11	elav-GAL4_11_17
elav-GAL4	98	11	18	elav-GAL4_11	elav-GAL4_11_18
elav-GAL4	95	11	19	elav-GAL4_11	elav-GAL4_11_19
elav-GAL4	99	11	20	elav-GAL4_11	elav-GAL4_11_20
elav-GAL4	75	12	1	elav-GAL4_12	elav-GAL4_12_1
elav-GAL4	101	12	2	elav-GAL4_12	elav-GAL4_12_2
elav-GAL4	98	12	3	elav-GAL4_12	elav-GAL4_12_3
elav-GAL4	96	12	4	elav-GAL4_12	elav-GAL4_12_4
elav-GAL4	97	12	5	elav-GAL4_12	elav-GAL4_12_5
elav-GAL4	93	12	6	elav-GAL4_12	elav-GAL4_12_6
elav-GAL4	93	12	7	elav-GAL4_12	elav-GAL4_12_7
elav-GAL4	101	12	8	elav-GAL4_12	elav-GAL4_12_8
elav-GAL4	100	12	9	elav-GAL4_12	elav-GAL4_12_9
elav-GAL4	97	12	10	elav-GAL4_12	elav-GAL4_12_10
elav-GAL4	94	12	11	elav-GAL4_12	elav-GAL4_12_11
elav-GAL4	80	12	12	elav-GAL4_12	elav-GAL4_12_12
elav-GAL4	89	12	13	elav-GAL4_12	elav-GAL4_12_13
elav-GAL4	91	12	14	elav-GAL4_12	elav-GAL4_12_14
elav-GAL4	96	12	15	elav-GAL4_12	elav-GAL4_12_15
elav-GAL4	83	12	16	elav-GAL4_12	elav-GAL4_12_16
elav-GAL4	95	12	17	elav-GAL4_12	elav-GAL4_12_17
elav-GAL4	93	12	18	elav-GAL4_12	elav-GAL4_12_18
elav-GAL4	100	12	19	elav-GAL4_12	elav-GAL4_12_19
elav-GAL4	104	12	20	elav-GAL4_12	elav-GAL4_12_20
elav-GAL4	81	13	1	elav-GAL4_13	elav-GAL4_13_1
elav-GAL4	101	13	2	elav-GAL4_13	elav-GAL4_13_2
elav-GAL4	92	13	3	elav-GAL4_13	elav-GAL4_13_3
elav-GAL4	86	13	4	elav-GAL4_13	elav-GAL4_13_4
elav-GAL4	98	13	5	elav-GAL4_13	elav-GAL4_13_5
elav-GAL4	100	13	6	elav-GAL4_13	elav-GAL4_13_6
elav-GAL4	90	13	7	elav-GAL4_13	elav-GAL4_13_7
elav-GAL4	75	13	8	elav-GAL4_13	elav-GAL4_13_8
elav-GAL4	90	13	9	elav-GAL4_13	elav-GAL4_13_9
elav-GAL4	96	13	10	elav-GAL4_13	elav-GAL4_13_10
elav-GAL4	94	13	11	elav-GAL4_13	elav-GAL4_13_11
elav-GAL4	87	13	12	elav-GAL4_13	elav-GAL4_13_12
elav-GAL4	109	13	13	elav-GAL4_13	elav-GAL4_13_13
elav-GAL4	92	13	14	elav-GAL4_13	elav-GAL4_13_14
elav-GAL4	91	13	15	elav-GAL4_13	elav-GAL4_13_15
elav-GAL4	95	13	16	elav-GAL4_13	elav-GAL4_13_16
elav-GAL4	89	13	17	elav-GAL4_13	elav-GAL4_13_17
elav-GAL4	96	13	18	elav-GAL4_13	elav-GAL4_13_18
elav-GAL4	98	13	19	elav-GAL4_13	elav-GAL4_13_19
elav-GAL4	100	13	20	elav-GAL4_13	elav-GAL4_13_20
elav-GAL4	83	14	1	elav-GAL4_14	elav-GAL4_14_1
elav-GAL4	88	14	2	elav-GAL4_14	elav-GAL4_14_2
elav-GAL4	89	14	3	elav-GAL4_14	elav-GAL4_14_3
elav-GAL4	68	14	4	elav-GAL4_14	elav-GAL4_14_4
elav-GAL4	91	14	5	elav-GAL4_14	elav-GAL4_14_5
elav-GAL4	88	14	6	elav-GAL4_14	elav-GAL4_14_6
elav-GAL4	71	14	7	elav-GAL4_14	elav-GAL4_14_7
elav-GAL4	97	14	8	elav-GAL4_14	elav-GAL4_14_8
elav-GAL4	90	14	9	elav-GAL4_14	elav-GAL4_14_9
elav-GAL4	70	14	10	elav-GAL4_14	elav-GAL4_14_10
elav-GAL4	76	14	11	elav-GAL4_14	elav-GAL4_14_11
elav-GAL4	84	14	12	elav-GAL4_14	elav-GAL4_14_12
elav-GAL4	79	14	13	elav-GAL4_14	elav-GAL4_14_13
elav-GAL4	87	14	14	elav-GAL4_14	elav-GAL4_14_14
elav-GAL4	89	14	15	elav-GAL4_14	elav-GAL4_14_15
elav-GAL4	94	14	16	elav-GAL4_14	elav-GAL4_14_16
elav-GAL4	89	14	17	elav-GAL4_14	elav-GAL4_14_17
elav-GAL4	86	14	18	elav-GAL4_14	elav-GAL4_14_18
elav-GAL4	87	14	19	elav-GAL4_14	elav-GAL4_14_19
elav-GAL4	100	14	20	elav-GAL4_14	elav-GAL4_14_20
elav-GAL4	103	15	1	elav-GAL4_15	elav-GAL4_15_1
elav-GAL4	99	15	2	elav-GAL4_15	elav-GAL4_15_2
elav-GAL4	99	15	3	elav-GAL4_15	elav-GAL4_15_3
elav-GAL4	102	15	4	elav-GAL4_15	elav-GAL4_15_4
elav-GAL4	96	15	5	elav-GAL4_15	elav-GAL4_15_5
elav-GAL4	95	15	6	elav-GAL4_15	elav-GAL4_15_6
elav-GAL4	105	15	7	elav-GAL4_15	elav-GAL4_15_7
elav-GAL4	104	15	8	elav-GAL4_15	elav-GAL4_15_8
elav-GAL4	118	15	9	elav-GAL4_15	elav-GAL4_15_9
elav-GAL4	89	15	10	elav-GAL4_15	elav-GAL4_15_10
elav-GAL4	99	15	11	elav-GAL4_15	elav-GAL4_15_11
elav-GAL4	97	15	12	elav-GAL4_15	elav-GAL4_15_12
elav-GAL4	89	15	13	elav-GAL4_15	elav-GAL4_15_13
elav-GAL4	89	15	14	elav-GAL4_15	elav-GAL4_15_14
elav-GAL4	89	15	15	elav-GAL4_15	elav-GAL4_15_15
elav-GAL4	98	15	16	elav-GAL4_15	elav-GAL4_15_16
elav-GAL4	97	15	17	elav-GAL4_15	elav-GAL4_15_17
elav-GAL4	97	15	18	elav-GAL4_15	elav-GAL4_15_18
elav-GAL4	96	15	19	elav-GAL4_15	elav-GAL4_15_19
elav-GAL4	90	15	20	elav-GAL4_15	elav-GAL4_15_20
elav-GAL4 > UAS-YippeeRNAi	83	1	1	elav-GAL4 > UAS-YippeeRNAi_1	elav-GAL4 > UAS-YippeeRNAi_1_1
elav-GAL4 > UAS-YippeeRNAi	83	1	2	elav-GAL4 > UAS-YippeeRNAi_1	elav-GAL4 > UAS-YippeeRNAi_1_2
elav-GAL4 > UAS-YippeeRNAi	91	1	3	elav-GAL4 > UAS-YippeeRNAi_1	elav-GAL4 > UAS-YippeeRNAi_1_3
elav-GAL4 > UAS-YippeeRNAi	91	1	4	elav-GAL4 > UAS-YippeeRNAi_1	elav-GAL4 > UAS-YippeeRNAi_1_4
elav-GAL4 > UAS-YippeeRNAi	85	1	5	elav-GAL4 > UAS-YippeeRNAi_1	elav-GAL4 > UAS-YippeeRNAi_1_5
elav-GAL4 > UAS-YippeeRNAi	89	1	6	elav-GAL4 > UAS-YippeeRNAi_1	elav-GAL4 > UAS-YippeeRNAi_1_6
elav-GAL4 > UAS-YippeeRNAi	89	1	7	elav-GAL4 > UAS-YippeeRNAi_1	elav-GAL4 > UAS-YippeeRNAi_1_7
elav-GAL4 > UAS-YippeeRNAi	99	1	8	elav-GAL4 > UAS-YippeeRNAi_1	elav-GAL4 > UAS-YippeeRNAi_1_8
elav-GAL4 > UAS-YippeeRNAi	94	1	9	elav-GAL4 > UAS-YippeeRNAi_1	elav-GAL4 > UAS-YippeeRNAi_1_9
elav-GAL4 > UAS-YippeeRNAi	99	1	10	elav-GAL4 > UAS-YippeeRNAi_1	elav-GAL4 > UAS-YippeeRNAi_1_10
elav-GAL4 > UAS-YippeeRNAi	103	1	11	elav-GAL4 > UAS-YippeeRNAi_1	elav-GAL4 > UAS-YippeeRNAi_1_11
elav-GAL4 > UAS-YippeeRNAi	84	1	12	elav-GAL4 > UAS-YippeeRNAi_1	elav-GAL4 > UAS-YippeeRNAi_1_12
elav-GAL4 > UAS-YippeeRNAi	81	1	13	elav-GAL4 > UAS-YippeeRNAi_1	elav-GAL4 > UAS-YippeeRNAi_1_13
elav-GAL4 > UAS-YippeeRNAi	84	1	14	elav-GAL4 > UAS-YippeeRNAi_1	elav-GAL4 > UAS-YippeeRNAi_1_14
elav-GAL4 > UAS-YippeeRNAi	75	1	15	elav-GAL4 > UAS-YippeeRNAi_1	elav-GAL4 > UAS-YippeeRNAi_1_15
elav-GAL4 > UAS-YippeeRNAi	96	1	16	elav-GAL4 > UAS-YippeeRNAi_1	elav-GAL4 > UAS-YippeeRNAi_1_16
elav-GAL4 > UAS-YippeeRNAi	77	1	17	elav-GAL4 > UAS-YippeeRNAi_1	elav-GAL4 > UAS-YippeeRNAi_1_17
elav-GAL4 > UAS-YippeeRNAi	80	1	18	elav-GAL4 > UAS-YippeeRNAi_1	elav-GAL4 > UAS-YippeeRNAi_1_18
elav-GAL4 > UAS-YippeeRNAi	81	1	19	elav-GAL4 > UAS-YippeeRNAi_1	elav-GAL4 > UAS-YippeeRNAi_1_19
elav-GAL4 > UAS-YippeeRNAi	96	1	20	elav-GAL4 > UAS-YippeeRNAi_1	elav-GAL4 > UAS-YippeeRNAi_1_20
elav-GAL4 > UAS-YippeeRNAi	81	2	1	elav-GAL4 > UAS-YippeeRNAi_2	elav-GAL4 > UAS-YippeeRNAi_2_1
elav-GAL4 > UAS-YippeeRNAi	81	2	2	elav-GAL4 > UAS-YippeeRNAi_2	elav-GAL4 > UAS-YippeeRNAi_2_2
elav-GAL4 > UAS-YippeeRNAi	91	2	3	elav-GAL4 > UAS-YippeeRNAi_2	elav-GAL4 > UAS-YippeeRNAi_2_3
elav-GAL4 > UAS-YippeeRNAi	84	2	4	elav-GAL4 > UAS-YippeeRNAi_2	elav-GAL4 > UAS-YippeeRNAi_2_4
elav-GAL4 > UAS-YippeeRNAi	95	2	5	elav-GAL4 > UAS-YippeeRNAi_2	elav-GAL4 > UAS-YippeeRNAi_2_5
elav-GAL4 > UAS-YippeeRNAi	93	2	6	elav-GAL4 > UAS-YippeeRNAi_2	elav-GAL4 > UAS-YippeeRNAi_2_6
elav-GAL4 > UAS-YippeeRNAi	94	2	7	elav-GAL4 > UAS-YippeeRNAi_2	elav-GAL4 > UAS-YippeeRNAi_2_7
elav-GAL4 > UAS-YippeeRNAi	97	2	8	elav-GAL4 > UAS-YippeeRNAi_2	elav-GAL4 > UAS-YippeeRNAi_2_8
elav-GAL4 > UAS-YippeeRNAi	92	2	9	elav-GAL4 > UAS-YippeeRNAi_2	elav-GAL4 > UAS-YippeeRNAi_2_9
elav-GAL4 > UAS-YippeeRNAi	92	2	10	elav-GAL4 > UAS-YippeeRNAi_2	elav-GAL4 > UAS-YippeeRNAi_2_10
elav-GAL4 > UAS-YippeeRNAi	90	2	11	elav-GAL4 > UAS-YippeeRNAi_2	elav-GAL4 > UAS-YippeeRNAi_2_11
elav-GAL4 > UAS-YippeeRNAi	87	2	12	elav-GAL4 > UAS-YippeeRNAi_2	elav-GAL4 > UAS-YippeeRNAi_2_12
elav-GAL4 > UAS-YippeeRNAi	81	2	13	elav-GAL4 > UAS-YippeeRNAi_2	elav-GAL4 > UAS-YippeeRNAi_2_13
elav-GAL4 > UAS-YippeeRNAi	95	2	14	elav-GAL4 > UAS-YippeeRNAi_2	elav-GAL4 > UAS-YippeeRNAi_2_14
elav-GAL4 > UAS-YippeeRNAi	81	2	15	elav-GAL4 > UAS-YippeeRNAi_2	elav-GAL4 > UAS-YippeeRNAi_2_15
elav-GAL4 > UAS-YippeeRNAi	89	2	16	elav-GAL4 > UAS-YippeeRNAi_2	elav-GAL4 > UAS-YippeeRNAi_2_16
elav-GAL4 > UAS-YippeeRNAi	94	2	17	elav-GAL4 > UAS-YippeeRNAi_2	elav-GAL4 > UAS-YippeeRNAi_2_17
elav-GAL4 > UAS-YippeeRNAi	85	2	18	elav-GAL4 > UAS-YippeeRNAi_2	elav-GAL4 > UAS-YippeeRNAi_2_18
elav-GAL4 > UAS-YippeeRNAi	86	2	19	elav-GAL4 > UAS-YippeeRNAi_2	elav-GAL4 > UAS-YippeeRNAi_2_19
elav-GAL4 > UAS-YippeeRNAi	92	2	20	elav-GAL4 > UAS-YippeeRNAi_2	elav-GAL4 > UAS-YippeeRNAi_2_20
elav-GAL4 > UAS-YippeeRNAi	73	3	1	elav-GAL4 > UAS-YippeeRNAi_3	elav-GAL4 > UAS-YippeeRNAi_3_1
elav-GAL4 > UAS-YippeeRNAi	73	3	2	elav-GAL4 > UAS-YippeeRNAi_3	elav-GAL4 > UAS-YippeeRNAi_3_2
elav-GAL4 > UAS-YippeeRNAi	83	3	3	elav-GAL4 > UAS-YippeeRNAi_3	elav-GAL4 > UAS-YippeeRNAi_3_3
elav-GAL4 > UAS-YippeeRNAi	84	3	4	elav-GAL4 > UAS-YippeeRNAi_3	elav-GAL4 > UAS-YippeeRNAi_3_4
elav-GAL4 > UAS-YippeeRNAi	90	3	5	elav-GAL4 > UAS-YippeeRNAi_3	elav-GAL4 > UAS-YippeeRNAi_3_5
elav-GAL4 > UAS-YippeeRNAi	77	3	6	elav-GAL4 > UAS-YippeeRNAi_3	elav-GAL4 > UAS-YippeeRNAi_3_6
elav-GAL4 > UAS-YippeeRNAi	87	3	7	elav-GAL4 > UAS-YippeeRNAi_3	elav-GAL4 > UAS-YippeeRNAi_3_7
elav-GAL4 > UAS-YippeeRNAi	82	3	8	elav-GAL4 > UAS-YippeeRNAi_3	elav-GAL4 > UAS-YippeeRNAi_3_8
elav-GAL4 > UAS-YippeeRNAi	88	3	9	elav-GAL4 > UAS-YippeeRNAi_3	elav-GAL4 > UAS-YippeeRNAi_3_9
elav-GAL4 > UAS-YippeeRNAi	87	3	10	elav-GAL4 > UAS-YippeeRNAi_3	elav-GAL4 > UAS-YippeeRNAi_3_10
elav-GAL4 > UAS-YippeeRNAi	88	3	11	elav-GAL4 > UAS-YippeeRNAi_3	elav-GAL4 > UAS-YippeeRNAi_3_11
elav-GAL4 > UAS-YippeeRNAi	90	3	12	elav-GAL4 > UAS-YippeeRNAi_3	elav-GAL4 > UAS-YippeeRNAi_3_12
elav-GAL4 > UAS-YippeeRNAi	77	3	13	elav-GAL4 > UAS-YippeeRNAi_3	elav-GAL4 > UAS-YippeeRNAi_3_13
elav-GAL4 > UAS-YippeeRNAi	61	3	14	elav-GAL4 > UAS-YippeeRNAi_3	elav-GAL4 > UAS-YippeeRNAi_3_14
elav-GAL4 > UAS-YippeeRNAi	78	3	15	elav-GAL4 > UAS-YippeeRNAi_3	elav-GAL4 > UAS-YippeeRNAi_3_15
elav-GAL4 > UAS-YippeeRNAi	67	3	16	elav-GAL4 > UAS-YippeeRNAi_3	elav-GAL4 > UAS-YippeeRNAi_3_16
elav-GAL4 > UAS-YippeeRNAi	80	3	17	elav-GAL4 > UAS-YippeeRNAi_3	elav-GAL4 > UAS-YippeeRNAi_3_17
elav-GAL4 > UAS-YippeeRNAi	69	3	18	elav-GAL4 > UAS-YippeeRNAi_3	elav-GAL4 > UAS-YippeeRNAi_3_18
elav-GAL4 > UAS-YippeeRNAi	85	3	19	elav-GAL4 > UAS-YippeeRNAi_3	elav-GAL4 > UAS-YippeeRNAi_3_19
elav-GAL4 > UAS-YippeeRNAi	89	3	20	elav-GAL4 > UAS-YippeeRNAi_3	elav-GAL4 > UAS-YippeeRNAi_3_20
elav-GAL4 > UAS-YippeeRNAi	81	4	1	elav-GAL4 > UAS-YippeeRNAi_4	elav-GAL4 > UAS-YippeeRNAi_4_1
elav-GAL4 > UAS-YippeeRNAi	84	4	2	elav-GAL4 > UAS-YippeeRNAi_4	elav-GAL4 > UAS-YippeeRNAi_4_2
elav-GAL4 > UAS-YippeeRNAi	89	4	3	elav-GAL4 > UAS-YippeeRNAi_4	elav-GAL4 > UAS-YippeeRNAi_4_3
elav-GAL4 > UAS-YippeeRNAi	85	4	4	elav-GAL4 > UAS-YippeeRNAi_4	elav-GAL4 > UAS-YippeeRNAi_4_4
elav-GAL4 > UAS-YippeeRNAi	93	4	5	elav-GAL4 > UAS-YippeeRNAi_4	elav-GAL4 > UAS-YippeeRNAi_4_5
elav-GAL4 > UAS-YippeeRNAi	85	4	6	elav-GAL4 > UAS-YippeeRNAi_4	elav-GAL4 > UAS-YippeeRNAi_4_6
elav-GAL4 > UAS-YippeeRNAi	81	4	7	elav-GAL4 > UAS-YippeeRNAi_4	elav-GAL4 > UAS-YippeeRNAi_4_7
elav-GAL4 > UAS-YippeeRNAi	81	4	8	elav-GAL4 > UAS-YippeeRNAi_4	elav-GAL4 > UAS-YippeeRNAi_4_8
elav-GAL4 > UAS-YippeeRNAi	92	4	9	elav-GAL4 > UAS-YippeeRNAi_4	elav-GAL4 > UAS-YippeeRNAi_4_9
elav-GAL4 > UAS-YippeeRNAi	80	4	10	elav-GAL4 > UAS-YippeeRNAi_4	elav-GAL4 > UAS-YippeeRNAi_4_10
elav-GAL4 > UAS-YippeeRNAi	80	4	11	elav-GAL4 > UAS-YippeeRNAi_4	elav-GAL4 > UAS-YippeeRNAi_4_11
elav-GAL4 > UAS-YippeeRNAi	83	4	12	elav-GAL4 > UAS-YippeeRNAi_4	elav-GAL4 > UAS-YippeeRNAi_4_12
elav-GAL4 > UAS-YippeeRNAi	87	4	13	elav-GAL4 > UAS-YippeeRNAi_4	elav-GAL4 > UAS-YippeeRNAi_4_13
elav-GAL4 > UAS-YippeeRNAi	92	4	14	elav-GAL4 > UAS-YippeeRNAi_4	elav-GAL4 > UAS-YippeeRNAi_4_14
elav-GAL4 > UAS-YippeeRNAi	100	4	15	elav-GAL4 > UAS-YippeeRNAi_4	elav-GAL4 > UAS-YippeeRNAi_4_15
elav-GAL4 > UAS-YippeeRNAi	90	4	16	elav-GAL4 > UAS-YippeeRNAi_4	elav-GAL4 > UAS-YippeeRNAi_4_16
elav-GAL4 > UAS-YippeeRNAi	77	4	17	elav-GAL4 > UAS-YippeeRNAi_4	elav-GAL4 > UAS-YippeeRNAi_4_17
elav-GAL4 > UAS-YippeeRNAi	94	4	18	elav-GAL4 > UAS-YippeeRNAi_4	elav-GAL4 > UAS-YippeeRNAi_4_18
elav-GAL4 > UAS-YippeeRNAi	87	4	19	elav-GAL4 > UAS-YippeeRNAi_4	elav-GAL4 > UAS-YippeeRNAi_4_19
elav-GAL4 > UAS-YippeeRNAi	77	4	20	elav-GAL4 > UAS-YippeeRNAi_4	elav-GAL4 > UAS-YippeeRNAi_4_20
elav-GAL4 > UAS-YippeeRNAi	67	5	1	elav-GAL4 > UAS-YippeeRNAi_5	elav-GAL4 > UAS-YippeeRNAi_5_1
elav-GAL4 > UAS-YippeeRNAi	79	5	2	elav-GAL4 > UAS-YippeeRNAi_5	elav-GAL4 > UAS-YippeeRNAi_5_2
elav-GAL4 > UAS-YippeeRNAi	83	5	3	elav-GAL4 > UAS-YippeeRNAi_5	elav-GAL4 > UAS-YippeeRNAi_5_3
elav-GAL4 > UAS-YippeeRNAi	75	5	4	elav-GAL4 > UAS-YippeeRNAi_5	elav-GAL4 > UAS-YippeeRNAi_5_4
elav-GAL4 > UAS-YippeeRNAi	88	5	5	elav-GAL4 > UAS-YippeeRNAi_5	elav-GAL4 > UAS-YippeeRNAi_5_5
elav-GAL4 > UAS-YippeeRNAi	80	5	6	elav-GAL4 > UAS-YippeeRNAi_5	elav-GAL4 > UAS-YippeeRNAi_5_6
elav-GAL4 > UAS-YippeeRNAi	87	5	7	elav-GAL4 > UAS-YippeeRNAi_5	elav-GAL4 > UAS-YippeeRNAi_5_7
elav-GAL4 > UAS-YippeeRNAi	87	5	8	elav-GAL4 > UAS-YippeeRNAi_5	elav-GAL4 > UAS-YippeeRNAi_5_8
elav-GAL4 > UAS-YippeeRNAi	89	5	9	elav-GAL4 > UAS-YippeeRNAi_5	elav-GAL4 > UAS-YippeeRNAi_5_9
elav-GAL4 > UAS-YippeeRNAi	87	5	10	elav-GAL4 > UAS-YippeeRNAi_5	elav-GAL4 > UAS-YippeeRNAi_5_10
elav-GAL4 > UAS-YippeeRNAi	74	5	11	elav-GAL4 > UAS-YippeeRNAi_5	elav-GAL4 > UAS-YippeeRNAi_5_11
elav-GAL4 > UAS-YippeeRNAi	79	5	12	elav-GAL4 > UAS-YippeeRNAi_5	elav-GAL4 > UAS-YippeeRNAi_5_12
elav-GAL4 > UAS-YippeeRNAi	65	5	13	elav-GAL4 > UAS-YippeeRNAi_5	elav-GAL4 > UAS-YippeeRNAi_5_13
elav-GAL4 > UAS-YippeeRNAi	77	5	14	elav-GAL4 > UAS-YippeeRNAi_5	elav-GAL4 > UAS-YippeeRNAi_5_14
elav-GAL4 > UAS-YippeeRNAi	77	5	15	elav-GAL4 > UAS-YippeeRNAi_5	elav-GAL4 > UAS-YippeeRNAi_5_15
elav-GAL4 > UAS-YippeeRNAi	80	5	16	elav-GAL4 > UAS-YippeeRNAi_5	elav-GAL4 > UAS-YippeeRNAi_5_16
elav-GAL4 > UAS-YippeeRNAi	73	5	17	elav-GAL4 > UAS-YippeeRNAi_5	elav-GAL4 > UAS-YippeeRNAi_5_17
elav-GAL4 > UAS-YippeeRNAi	71	5	18	elav-GAL4 > UAS-YippeeRNAi_5	elav-GAL4 > UAS-YippeeRNAi_5_18
elav-GAL4 > UAS-YippeeRNAi	77	5	19	elav-GAL4 > UAS-YippeeRNAi_5	elav-GAL4 > UAS-YippeeRNAi_5_19
elav-GAL4 > UAS-YippeeRNAi	79	5	20	elav-GAL4 > UAS-YippeeRNAi_5	elav-GAL4 > UAS-YippeeRNAi_5_20
elav-GAL4 > UAS-YippeeRNAi	75	6	1	elav-GAL4 > UAS-YippeeRNAi_6	elav-GAL4 > UAS-YippeeRNAi_6_1
elav-GAL4 > UAS-YippeeRNAi	84	6	2	elav-GAL4 > UAS-YippeeRNAi_6	elav-GAL4 > UAS-YippeeRNAi_6_2
elav-GAL4 > UAS-YippeeRNAi	85	6	3	elav-GAL4 > UAS-YippeeRNAi_6	elav-GAL4 > UAS-YippeeRNAi_6_3
elav-GAL4 > UAS-YippeeRNAi	63	6	4	elav-GAL4 > UAS-YippeeRNAi_6	elav-GAL4 > UAS-YippeeRNAi_6_4
elav-GAL4 > UAS-YippeeRNAi	87	6	5	elav-GAL4 > UAS-YippeeRNAi_6	elav-GAL4 > UAS-YippeeRNAi_6_5
elav-GAL4 > UAS-YippeeRNAi	86	6	6	elav-GAL4 > UAS-YippeeRNAi_6	elav-GAL4 > UAS-YippeeRNAi_6_6
elav-GAL4 > UAS-YippeeRNAi	82	6	7	elav-GAL4 > UAS-YippeeRNAi_6	elav-GAL4 > UAS-YippeeRNAi_6_7
elav-GAL4 > UAS-YippeeRNAi	100	6	8	elav-GAL4 > UAS-YippeeRNAi_6	elav-GAL4 > UAS-YippeeRNAi_6_8
elav-GAL4 > UAS-YippeeRNAi	97	6	9	elav-GAL4 > UAS-YippeeRNAi_6	elav-GAL4 > UAS-YippeeRNAi_6_9
elav-GAL4 > UAS-YippeeRNAi	89	6	10	elav-GAL4 > UAS-YippeeRNAi_6	elav-GAL4 > UAS-YippeeRNAi_6_10
elav-GAL4 > UAS-YippeeRNAi	73	6	11	elav-GAL4 > UAS-YippeeRNAi_6	elav-GAL4 > UAS-YippeeRNAi_6_11
elav-GAL4 > UAS-YippeeRNAi	75	6	12	elav-GAL4 > UAS-YippeeRNAi_6	elav-GAL4 > UAS-YippeeRNAi_6_12
elav-GAL4 > UAS-YippeeRNAi	72	6	13	elav-GAL4 > UAS-YippeeRNAi_6	elav-GAL4 > UAS-YippeeRNAi_6_13
elav-GAL4 > UAS-YippeeRNAi	81	6	14	elav-GAL4 > UAS-YippeeRNAi_6	elav-GAL4 > UAS-YippeeRNAi_6_14
elav-GAL4 > UAS-YippeeRNAi	83	6	15	elav-GAL4 > UAS-YippeeRNAi_6	elav-GAL4 > UAS-YippeeRNAi_6_15
elav-GAL4 > UAS-YippeeRNAi	87	6	16	elav-GAL4 > UAS-YippeeRNAi_6	elav-GAL4 > UAS-YippeeRNAi_6_16
elav-GAL4 > UAS-YippeeRNAi	89	6	17	elav-GAL4 > UAS-YippeeRNAi_6	elav-GAL4 > UAS-YippeeRNAi_6_17
elav-GAL4 > UAS-YippeeRNAi	84	6	18	elav-GAL4 > UAS-YippeeRNAi_6	elav-GAL4 > UAS-YippeeRNAi_6_18
elav-GAL4 > UAS-YippeeRNAi	86	6	19	elav-GAL4 > UAS-YippeeRNAi_6	elav-GAL4 > UAS-YippeeRNAi_6_19
elav-GAL4 > UAS-YippeeRNAi	89	6	20	elav-GAL4 > UAS-YippeeRNAi_6	elav-GAL4 > UAS-YippeeRNAi_6_20
elav-GAL4 > UAS-YippeeRNAi	83	7	1	elav-GAL4 > UAS-YippeeRNAi_7	elav-GAL4 > UAS-YippeeRNAi_7_1
elav-GAL4 > UAS-YippeeRNAi	86	7	2	elav-GAL4 > UAS-YippeeRNAi_7	elav-GAL4 > UAS-YippeeRNAi_7_2
elav-GAL4 > UAS-YippeeRNAi	96	7	3	elav-GAL4 > UAS-YippeeRNAi_7	elav-GAL4 > UAS-YippeeRNAi_7_3
elav-GAL4 > UAS-YippeeRNAi	101	7	4	elav-GAL4 > UAS-YippeeRNAi_7	elav-GAL4 > UAS-YippeeRNAi_7_4
elav-GAL4 > UAS-YippeeRNAi	100	7	5	elav-GAL4 > UAS-YippeeRNAi_7	elav-GAL4 > UAS-YippeeRNAi_7_5
elav-GAL4 > UAS-YippeeRNAi	101	7	6	elav-GAL4 > UAS-YippeeRNAi_7	elav-GAL4 > UAS-YippeeRNAi_7_6
elav-GAL4 > UAS-YippeeRNAi	101	7	7	elav-GAL4 > UAS-YippeeRNAi_7	elav-GAL4 > UAS-YippeeRNAi_7_7
elav-GAL4 > UAS-YippeeRNAi	90	7	8	elav-GAL4 > UAS-YippeeRNAi_7	elav-GAL4 > UAS-YippeeRNAi_7_8
elav-GAL4 > UAS-YippeeRNAi	103	7	9	elav-GAL4 > UAS-YippeeRNAi_7	elav-GAL4 > UAS-YippeeRNAi_7_9
elav-GAL4 > UAS-YippeeRNAi	101	7	10	elav-GAL4 > UAS-YippeeRNAi_7	elav-GAL4 > UAS-YippeeRNAi_7_10
elav-GAL4 > UAS-YippeeRNAi	95	7	11	elav-GAL4 > UAS-YippeeRNAi_7	elav-GAL4 > UAS-YippeeRNAi_7_11
elav-GAL4 > UAS-YippeeRNAi	89	7	12	elav-GAL4 > UAS-YippeeRNAi_7	elav-GAL4 > UAS-YippeeRNAi_7_12
elav-GAL4 > UAS-YippeeRNAi	105	7	13	elav-GAL4 > UAS-YippeeRNAi_7	elav-GAL4 > UAS-YippeeRNAi_7_13
elav-GAL4 > UAS-YippeeRNAi	91	7	14	elav-GAL4 > UAS-YippeeRNAi_7	elav-GAL4 > UAS-YippeeRNAi_7_14
elav-GAL4 > UAS-YippeeRNAi	94	7	15	elav-GAL4 > UAS-YippeeRNAi_7	elav-GAL4 > UAS-YippeeRNAi_7_15
elav-GAL4 > UAS-YippeeRNAi	95	7	16	elav-GAL4 > UAS-YippeeRNAi_7	elav-GAL4 > UAS-YippeeRNAi_7_16
elav-GAL4 > UAS-YippeeRNAi	99	7	17	elav-GAL4 > UAS-YippeeRNAi_7	elav-GAL4 > UAS-YippeeRNAi_7_17
elav-GAL4 > UAS-YippeeRNAi	106	7	18	elav-GAL4 > UAS-YippeeRNAi_7	elav-GAL4 > UAS-YippeeRNAi_7_18
elav-GAL4 > UAS-YippeeRNAi	99	7	19	elav-GAL4 > UAS-YippeeRNAi_7	elav-GAL4 > UAS-YippeeRNAi_7_19
elav-GAL4 > UAS-YippeeRNAi	104	7	20	elav-GAL4 > UAS-YippeeRNAi_7	elav-GAL4 > UAS-YippeeRNAi_7_20
elav-GAL4 > UAS-YippeeRNAi	74	8	1	elav-GAL4 > UAS-YippeeRNAi_8	elav-GAL4 > UAS-YippeeRNAi_8_1
elav-GAL4 > UAS-YippeeRNAi	90	8	2	elav-GAL4 > UAS-YippeeRNAi_8	elav-GAL4 > UAS-YippeeRNAi_8_2
elav-GAL4 > UAS-YippeeRNAi	75	8	3	elav-GAL4 > UAS-YippeeRNAi_8	elav-GAL4 > UAS-YippeeRNAi_8_3
elav-GAL4 > UAS-YippeeRNAi	85	8	4	elav-GAL4 > UAS-YippeeRNAi_8	elav-GAL4 > UAS-YippeeRNAi_8_4
elav-GAL4 > UAS-YippeeRNAi	91	8	5	elav-GAL4 > UAS-YippeeRNAi_8	elav-GAL4 > UAS-YippeeRNAi_8_5
elav-GAL4 > UAS-YippeeRNAi	83	8	6	elav-GAL4 > UAS-YippeeRNAi_8	elav-GAL4 > UAS-YippeeRNAi_8_6
elav-GAL4 > UAS-YippeeRNAi	76	8	7	elav-GAL4 > UAS-YippeeRNAi_8	elav-GAL4 > UAS-YippeeRNAi_8_7
elav-GAL4 > UAS-YippeeRNAi	79	8	8	elav-GAL4 > UAS-YippeeRNAi_8	elav-GAL4 > UAS-YippeeRNAi_8_8
elav-GAL4 > UAS-YippeeRNAi	75	8	9	elav-GAL4 > UAS-YippeeRNAi_8	elav-GAL4 > UAS-YippeeRNAi_8_9
elav-GAL4 > UAS-YippeeRNAi	73	8	10	elav-GAL4 > UAS-YippeeRNAi_8	elav-GAL4 > UAS-YippeeRNAi_8_10
elav-GAL4 > UAS-YippeeRNAi	70	8	11	elav-GAL4 > UAS-YippeeRNAi_8	elav-GAL4 > UAS-YippeeRNAi_8_11
elav-GAL4 > UAS-YippeeRNAi	79	8	12	elav-GAL4 > UAS-YippeeRNAi_8	elav-GAL4 > UAS-YippeeRNAi_8_12
elav-GAL4 > UAS-YippeeRNAi	80	8	13	elav-GAL4 > UAS-YippeeRNAi_8	elav-GAL4 > UAS-YippeeRNAi_8_13
elav-GAL4 > UAS-YippeeRNAi	84	8	14	elav-GAL4 > UAS-YippeeRNAi_8	elav-GAL4 > UAS-YippeeRNAi_8_14
elav-GAL4 > UAS-YippeeRNAi	89	8	15	elav-GAL4 > UAS-YippeeRNAi_8	elav-GAL4 > UAS-YippeeRNAi_8_15
elav-GAL4 > UAS-YippeeRNAi	80	8	16	elav-GAL4 > UAS-YippeeRNAi_8	elav-GAL4 > UAS-YippeeRNAi_8_16
elav-GAL4 > UAS-YippeeRNAi	69	8	17	elav-GAL4 > UAS-YippeeRNAi_8	elav-GAL4 > UAS-YippeeRNAi_8_17
elav-GAL4 > UAS-YippeeRNAi	82	8	18	elav-GAL4 > UAS-YippeeRNAi_8	elav-GAL4 > UAS-YippeeRNAi_8_18
elav-GAL4 > UAS-YippeeRNAi	79	8	19	elav-GAL4 > UAS-YippeeRNAi_8	elav-GAL4 > UAS-YippeeRNAi_8_19
elav-GAL4 > UAS-YippeeRNAi	83	8	20	elav-GAL4 > UAS-YippeeRNAi_8	elav-GAL4 > UAS-YippeeRNAi_8_20
elav-GAL4 > UAS-YippeeRNAi	88	9	1	elav-GAL4 > UAS-YippeeRNAi_9	elav-GAL4 > UAS-YippeeRNAi_9_1
elav-GAL4 > UAS-YippeeRNAi	88	9	2	elav-GAL4 > UAS-YippeeRNAi_9	elav-GAL4 > UAS-YippeeRNAi_9_2
elav-GAL4 > UAS-YippeeRNAi	100	9	3	elav-GAL4 > UAS-YippeeRNAi_9	elav-GAL4 > UAS-YippeeRNAi_9_3
elav-GAL4 > UAS-YippeeRNAi	103	9	4	elav-GAL4 > UAS-YippeeRNAi_9	elav-GAL4 > UAS-YippeeRNAi_9_4
elav-GAL4 > UAS-YippeeRNAi	99	9	5	elav-GAL4 > UAS-YippeeRNAi_9	elav-GAL4 > UAS-YippeeRNAi_9_5
elav-GAL4 > UAS-YippeeRNAi	97	9	6	elav-GAL4 > UAS-YippeeRNAi_9	elav-GAL4 > UAS-YippeeRNAi_9_6
elav-GAL4 > UAS-YippeeRNAi	100	9	7	elav-GAL4 > UAS-YippeeRNAi_9	elav-GAL4 > UAS-YippeeRNAi_9_7
elav-GAL4 > UAS-YippeeRNAi	104	9	8	elav-GAL4 > UAS-YippeeRNAi_9	elav-GAL4 > UAS-YippeeRNAi_9_8
elav-GAL4 > UAS-YippeeRNAi	95	9	9	elav-GAL4 > UAS-YippeeRNAi_9	elav-GAL4 > UAS-YippeeRNAi_9_9
elav-GAL4 > UAS-YippeeRNAi	106	9	10	elav-GAL4 > UAS-YippeeRNAi_9	elav-GAL4 > UAS-YippeeRNAi_9_10
elav-GAL4 > UAS-YippeeRNAi	100	9	11	elav-GAL4 > UAS-YippeeRNAi_9	elav-GAL4 > UAS-YippeeRNAi_9_11
elav-GAL4 > UAS-YippeeRNAi	97	9	12	elav-GAL4 > UAS-YippeeRNAi_9	elav-GAL4 > UAS-YippeeRNAi_9_12
elav-GAL4 > UAS-YippeeRNAi	100	9	13	elav-GAL4 > UAS-YippeeRNAi_9	elav-GAL4 > UAS-YippeeRNAi_9_13
elav-GAL4 > UAS-YippeeRNAi	101	9	14	elav-GAL4 > UAS-YippeeRNAi_9	elav-GAL4 > UAS-YippeeRNAi_9_14
elav-GAL4 > UAS-YippeeRNAi	92	9	15	elav-GAL4 > UAS-YippeeRNAi_9	elav-GAL4 > UAS-YippeeRNAi_9_15
elav-GAL4 > UAS-YippeeRNAi	84	9	16	elav-GAL4 > UAS-YippeeRNAi_9	elav-GAL4 > UAS-YippeeRNAi_9_16
elav-GAL4 > UAS-YippeeRNAi	97	9	17	elav-GAL4 > UAS-YippeeRNAi_9	elav-GAL4 > UAS-YippeeRNAi_9_17
elav-GAL4 > UAS-YippeeRNAi	91	9	18	elav-GAL4 > UAS-YippeeRNAi_9	elav-GAL4 > UAS-YippeeRNAi_9_18
elav-GAL4 > UAS-YippeeRNAi	90	9	19	elav-GAL4 > UAS-YippeeRNAi_9	elav-GAL4 > UAS-YippeeRNAi_9_19
elav-GAL4 > UAS-YippeeRNAi	93	9	20	elav-GAL4 > UAS-YippeeRNAi_9	elav-GAL4 > UAS-YippeeRNAi_9_20
elav-GAL4 > UAS-YippeeRNAi	89	10	1	elav-GAL4 > UAS-YippeeRNAi_10	elav-GAL4 > UAS-YippeeRNAi_10_1
elav-GAL4 > UAS-YippeeRNAi	82	10	2	elav-GAL4 > UAS-YippeeRNAi_10	elav-GAL4 > UAS-YippeeRNAi_10_2
elav-GAL4 > UAS-YippeeRNAi	98	10	3	elav-GAL4 > UAS-YippeeRNAi_10	elav-GAL4 > UAS-YippeeRNAi_10_3
elav-GAL4 > UAS-YippeeRNAi	104	10	4	elav-GAL4 > UAS-YippeeRNAi_10	elav-GAL4 > UAS-YippeeRNAi_10_4
elav-GAL4 > UAS-YippeeRNAi	101	10	5	elav-GAL4 > UAS-YippeeRNAi_10	elav-GAL4 > UAS-YippeeRNAi_10_5
elav-GAL4 > UAS-YippeeRNAi	99	10	6	elav-GAL4 > UAS-YippeeRNAi_10	elav-GAL4 > UAS-YippeeRNAi_10_6
elav-GAL4 > UAS-YippeeRNAi	98	10	7	elav-GAL4 > UAS-YippeeRNAi_10	elav-GAL4 > UAS-YippeeRNAi_10_7
elav-GAL4 > UAS-YippeeRNAi	100	10	8	elav-GAL4 > UAS-YippeeRNAi_10	elav-GAL4 > UAS-YippeeRNAi_10_8
elav-GAL4 > UAS-YippeeRNAi	88	10	9	elav-GAL4 > UAS-YippeeRNAi_10	elav-GAL4 > UAS-YippeeRNAi_10_9
elav-GAL4 > UAS-YippeeRNAi	106	10	10	elav-GAL4 > UAS-YippeeRNAi_10	elav-GAL4 > UAS-YippeeRNAi_10_10
elav-GAL4 > UAS-YippeeRNAi	106	10	11	elav-GAL4 > UAS-YippeeRNAi_10	elav-GAL4 > UAS-YippeeRNAi_10_11
elav-GAL4 > UAS-YippeeRNAi	92	10	12	elav-GAL4 > UAS-YippeeRNAi_10	elav-GAL4 > UAS-YippeeRNAi_10_12
elav-GAL4 > UAS-YippeeRNAi	99	10	13	elav-GAL4 > UAS-YippeeRNAi_10	elav-GAL4 > UAS-YippeeRNAi_10_13
elav-GAL4 > UAS-YippeeRNAi	98	10	14	elav-GAL4 > UAS-YippeeRNAi_10	elav-GAL4 > UAS-YippeeRNAi_10_14
elav-GAL4 > UAS-YippeeRNAi	91	10	15	elav-GAL4 > UAS-YippeeRNAi_10	elav-GAL4 > UAS-YippeeRNAi_10_15
elav-GAL4 > UAS-YippeeRNAi	101	10	16	elav-GAL4 > UAS-YippeeRNAi_10	elav-GAL4 > UAS-YippeeRNAi_10_16
elav-GAL4 > UAS-YippeeRNAi	103	10	17	elav-GAL4 > UAS-YippeeRNAi_10	elav-GAL4 > UAS-YippeeRNAi_10_17
elav-GAL4 > UAS-YippeeRNAi	105	10	18	elav-GAL4 > UAS-YippeeRNAi_10	elav-GAL4 > UAS-YippeeRNAi_10_18
elav-GAL4 > UAS-YippeeRNAi	105	10	19	elav-GAL4 > UAS-YippeeRNAi_10	elav-GAL4 > UAS-YippeeRNAi_10_19
[truncated: 1,901 more rows]

## Sheet: Expt 5-Figure 4G data
Genotype	Gray value	fly	pixel	flyid	pixelid
s+; Act5C-GAL4	69	1	1	s+; Act5C-GAL4_1	s+; Act5C-GAL4_1_1
s+; Act5C-GAL4	53	1	2	s+; Act5C-GAL4_1	s+; Act5C-GAL4_1_2
s+; Act5C-GAL4	70	1	3	s+; Act5C-GAL4_1	s+; Act5C-GAL4_1_3
s+; Act5C-GAL4	78	1	4	s+; Act5C-GAL4_1	s+; Act5C-GAL4_1_4
s+; Act5C-GAL4	78	1	5	s+; Act5C-GAL4_1	s+; Act5C-GAL4_1_5
s+; Act5C-GAL4	64	1	6	s+; Act5C-GAL4_1	s+; Act5C-GAL4_1_6
s+; Act5C-GAL4	73	1	7	s+; Act5C-GAL4_1	s+; Act5C-GAL4_1_7
s+; Act5C-GAL4	69	1	8	s+; Act5C-GAL4_1	s+; Act5C-GAL4_1_8
s+; Act5C-GAL4	71	1	9	s+; Act5C-GAL4_1	s+; Act5C-GAL4_1_9
s+; Act5C-GAL4	75	1	10	s+; Act5C-GAL4_1	s+; Act5C-GAL4_1_10
s+; Act5C-GAL4	76	1	11	s+; Act5C-GAL4_1	s+; Act5C-GAL4_1_11
s+; Act5C-GAL4	60	1	12	s+; Act5C-GAL4_1	s+; Act5C-GAL4_1_12
s+; Act5C-GAL4	74	1	13	s+; Act5C-GAL4_1	s+; Act5C-GAL4_1_13
s+; Act5C-GAL4	82	1	14	s+; Act5C-GAL4_1	s+; Act5C-GAL4_1_14
s+; Act5C-GAL4	71	1	15	s+; Act5C-GAL4_1	s+; Act5C-GAL4_1_15
s+; Act5C-GAL4	83	1	16	s+; Act5C-GAL4_1	s+; Act5C-GAL4_1_16
s+; Act5C-GAL4	65	1	17	s+; Act5C-GAL4_1	s+; Act5C-GAL4_1_17
s+; Act5C-GAL4	75	1	18	s+; Act5C-GAL4_1	s+; Act5C-GAL4_1_18
s+; Act5C-GAL4	82	1	19	s+; Act5C-GAL4_1	s+; Act5C-GAL4_1_19
s+; Act5C-GAL4	79	1	20	s+; Act5C-GAL4_1	s+; Act5C-GAL4_1_20
s+; Act5C-GAL4	72	2	1	s+; Act5C-GAL4_2	s+; Act5C-GAL4_2_1
s+; Act5C-GAL4	72	2	2	s+; Act5C-GAL4_2	s+; Act5C-GAL4_2_2
s+; Act5C-GAL4	77	2	3	s+; Act5C-GAL4_2	s+; Act5C-GAL4_2_3
s+; Act5C-GAL4	88	2	4	s+; Act5C-GAL4_2	s+; Act5C-GAL4_2_4
s+; Act5C-GAL4	78	2	5	s+; Act5C-GAL4_2	s+; Act5C-GAL4_2_5
s+; Act5C-GAL4	88	2	6	s+; Act5C-GAL4_2	s+; Act5C-GAL4_2_6
s+; Act5C-GAL4	107	2	7	s+; Act5C-GAL4_2	s+; Act5C-GAL4_2_7
s+; Act5C-GAL4	99	2	8	s+; Act5C-GAL4_2	s+; Act5C-GAL4_2_8
s+; Act5C-GAL4	66	2	9	s+; Act5C-GAL4_2	s+; Act5C-GAL4_2_9
s+; Act5C-GAL4	79	2	10	s+; Act5C-GAL4_2	s+; Act5C-GAL4_2_10
s+; Act5C-GAL4	83	2	11	s+; Act5C-GAL4_2	s+; Act5C-GAL4_2_11
s+; Act5C-GAL4	70	2	12	s+; Act5C-GAL4_2	s+; Act5C-GAL4_2_12
s+; Act5C-GAL4	75	2	13	s+; Act5C-GAL4_2	s+; Act5C-GAL4_2_13
s+; Act5C-GAL4	86	2	14	s+; Act5C-GAL4_2	s+; Act5C-GAL4_2_14
s+; Act5C-GAL4	83	2	15	s+; Act5C-GAL4_2	s+; Act5C-GAL4_2_15
s+; Act5C-GAL4	80	2	16	s+; Act5C-GAL4_2	s+; Act5C-GAL4_2_16
s+; Act5C-GAL4	71	2	17	s+; Act5C-GAL4_2	s+; Act5C-GAL4_2_17
s+; Act5C-GAL4	59	2	18	s+; Act5C-GAL4_2	s+; Act5C-GAL4_2_18
s+; Act5C-GAL4	77	2	19	s+; Act5C-GAL4_2	s+; Act5C-GAL4_2_19
s+; Act5C-GAL4	81	2	20	s+; Act5C-GAL4_2	s+; Act5C-GAL4_2_20
s+; Act5C-GAL4	89	3	1	s+; Act5C-GAL4_3	s+; Act5C-GAL4_3_1
s+; Act5C-GAL4	82	3	2	s+; Act5C-GAL4_3	s+; Act5C-GAL4_3_2
s+; Act5C-GAL4	89	3	3	s+; Act5C-GAL4_3	s+; Act5C-GAL4_3_3
s+; Act5C-GAL4	77	3	4	s+; Act5C-GAL4_3	s+; Act5C-GAL4_3_4
s+; Act5C-GAL4	83	3	5	s+; Act5C-GAL4_3	s+; Act5C-GAL4_3_5
s+; Act5C-GAL4	83	3	6	s+; Act5C-GAL4_3	s+; Act5C-GAL4_3_6
s+; Act5C-GAL4	89	3	7	s+; Act5C-GAL4_3	s+; Act5C-GAL4_3_7
s+; Act5C-GAL4	81	3	8	s+; Act5C-GAL4_3	s+; Act5C-GAL4_3_8
s+; Act5C-GAL4	92	3	9	s+; Act5C-GAL4_3	s+; Act5C-GAL4_3_9
s+; Act5C-GAL4	85	3	10	s+; Act5C-GAL4_3	s+; Act5C-GAL4_3_10
s+; Act5C-GAL4	90	3	11	s+; Act5C-GAL4_3	s+; Act5C-GAL4_3_11
s+; Act5C-GAL4	81	3	12	s+; Act5C-GAL4_3	s+; Act5C-GAL4_3_12
s+; Act5C-GAL4	98	3	13	s+; Act5C-GAL4_3	s+; Act5C-GAL4_3_13
s+; Act5C-GAL4	83	3	14	s+; Act5C-GAL4_3	s+; Act5C-GAL4_3_14
s+; Act5C-GAL4	90	3	15	s+; Act5C-GAL4_3	s+; Act5C-GAL4_3_15
s+; Act5C-GAL4	89	3	16	s+; Act5C-GAL4_3	s+; Act5C-GAL4_3_16
s+; Act5C-GAL4	71	3	17	s+; Act5C-GAL4_3	s+; Act5C-GAL4_3_17
s+; Act5C-GAL4	85	3	18	s+; Act5C-GAL4_3	s+; Act5C-GAL4_3_18
s+; Act5C-GAL4	86	3	19	s+; Act5C-GAL4_3	s+; Act5C-GAL4_3_19
s+; Act5C-GAL4	86	3	20	s+; Act5C-GAL4_3	s+; Act5C-GAL4_3_20
s+; Act5C-GAL4	81	4	1	s+; Act5C-GAL4_4	s+; Act5C-GAL4_4_1
s+; Act5C-GAL4	96	4	2	s+; Act5C-GAL4_4	s+; Act5C-GAL4_4_2
s+; Act5C-GAL4	81	4	3	s+; Act5C-GAL4_4	s+; Act5C-GAL4_4_3
s+; Act5C-GAL4	83	4	4	s+; Act5C-GAL4_4	s+; Act5C-GAL4_4_4
s+; Act5C-GAL4	85	4	5	s+; Act5C-GAL4_4	s+; Act5C-GAL4_4_5
s+; Act5C-GAL4	83	4	6	s+; Act5C-GAL4_4	s+; Act5C-GAL4_4_6
s+; Act5C-GAL4	73	4	7	s+; Act5C-GAL4_4	s+; Act5C-GAL4_4_7
s+; Act5C-GAL4	86	4	8	s+; Act5C-GAL4_4	s+; Act5C-GAL4_4_8
s+; Act5C-GAL4	79	4	9	s+; Act5C-GAL4_4	s+; Act5C-GAL4_4_9
s+; Act5C-GAL4	93	4	10	s+; Act5C-GAL4_4	s+; Act5C-GAL4_4_10
s+; Act5C-GAL4	80	4	11	s+; Act5C-GAL4_4	s+; Act5C-GAL4_4_11
s+; Act5C-GAL4	70	4	12	s+; Act5C-GAL4_4	s+; Act5C-GAL4_4_12
s+; Act5C-GAL4	91	4	13	s+; Act5C-GAL4_4	s+; Act5C-GAL4_4_13
s+; Act5C-GAL4	89	4	14	s+; Act5C-GAL4_4	s+; Act5C-GAL4_4_14
s+; Act5C-GAL4	85	4	15	s+; Act5C-GAL4_4	s+; Act5C-GAL4_4_15
s+; Act5C-GAL4	89	4	16	s+; Act5C-GAL4_4	s+; Act5C-GAL4_4_16
s+; Act5C-GAL4	67	4	17	s+; Act5C-GAL4_4	s+; Act5C-GAL4_4_17
s+; Act5C-GAL4	69	4	18	s+; Act5C-GAL4_4	s+; Act5C-GAL4_4_18
s+; Act5C-GAL4	82	4	19	s+; Act5C-GAL4_4	s+; Act5C-GAL4_4_19
s+; Act5C-GAL4	76	4	20	s+; Act5C-GAL4_4	s+; Act5C-GAL4_4_20
s+; Act5C-GAL4	85	5	1	s+; Act5C-GAL4_5	s+; Act5C-GAL4_5_1
s+; Act5C-GAL4	72	5	2	s+; Act5C-GAL4_5	s+; Act5C-GAL4_5_2
s+; Act5C-GAL4	85	5	3	s+; Act5C-GAL4_5	s+; Act5C-GAL4_5_3
s+; Act5C-GAL4	94	5	4	s+; Act5C-GAL4_5	s+; Act5C-GAL4_5_4
s+; Act5C-GAL4	73	5	5	s+; Act5C-GAL4_5	s+; Act5C-GAL4_5_5
s+; Act5C-GAL4	98	5	6	s+; Act5C-GAL4_5	s+; Act5C-GAL4_5_6
s+; Act5C-GAL4	70	5	7	s+; Act5C-GAL4_5	s+; Act5C-GAL4_5_7
s+; Act5C-GAL4	97	5	8	s+; Act5C-GAL4_5	s+; Act5C-GAL4_5_8
s+; Act5C-GAL4	91	5	9	s+; Act5C-GAL4_5	s+; Act5C-GAL4_5_9
s+; Act5C-GAL4	88	5	10	s+; Act5C-GAL4_5	s+; Act5C-GAL4_5_10
s+; Act5C-GAL4	74	5	11	s+; Act5C-GAL4_5	s+; Act5C-GAL4_5_11
s+; Act5C-GAL4	84	5	12	s+; Act5C-GAL4_5	s+; Act5C-GAL4_5_12
s+; Act5C-GAL4	76	5	13	s+; Act5C-GAL4_5	s+; Act5C-GAL4_5_13
s+; Act5C-GAL4	91	5	14	s+; Act5C-GAL4_5	s+; Act5C-GAL4_5_14
s+; Act5C-GAL4	88	5	15	s+; Act5C-GAL4_5	s+; Act5C-GAL4_5_15
s+; Act5C-GAL4	99	5	16	s+; Act5C-GAL4_5	s+; Act5C-GAL4_5_16
s+; Act5C-GAL4	77	5	17	s+; Act5C-GAL4_5	s+; Act5C-GAL4_5_17
s+; Act5C-GAL4	89	5	18	s+; Act5C-GAL4_5	s+; Act5C-GAL4_5_18
s+; Act5C-GAL4	80	5	19	s+; Act5C-GAL4_5	s+; Act5C-GAL4_5_19
s+; Act5C-GAL4	73	5	20	s+; Act5C-GAL4_5	s+; Act5C-GAL4_5_20
s+; Act5C-GAL4	75	6	1	s+; Act5C-GAL4_6	s+; Act5C-GAL4_6_1
s+; Act5C-GAL4	94	6	2	s+; Act5C-GAL4_6	s+; Act5C-GAL4_6_2
s+; Act5C-GAL4	74	6	3	s+; Act5C-GAL4_6	s+; Act5C-GAL4_6_3
s+; Act5C-GAL4	82	6	4	s+; Act5C-GAL4_6	s+; Act5C-GAL4_6_4
s+; Act5C-GAL4	65	6	5	s+; Act5C-GAL4_6	s+; Act5C-GAL4_6_5
s+; Act5C-GAL4	63	6	6	s+; Act5C-GAL4_6	s+; Act5C-GAL4_6_6
s+; Act5C-GAL4	78	6	7	s+; Act5C-GAL4_6	s+; Act5C-GAL4_6_7
s+; Act5C-GAL4	64	6	8	s+; Act5C-GAL4_6	s+; Act5C-GAL4_6_8
s+; Act5C-GAL4	71	6	9	s+; Act5C-GAL4_6	s+; Act5C-GAL4_6_9
s+; Act5C-GAL4	86	6	10	s+; Act5C-GAL4_6	s+; Act5C-GAL4_6_10
s+; Act5C-GAL4	77	6	11	s+; Act5C-GAL4_6	s+; Act5C-GAL4_6_11
s+; Act5C-GAL4	80	6	12	s+; Act5C-GAL4_6	s+; Act5C-GAL4_6_12
s+; Act5C-GAL4	81	6	13	s+; Act5C-GAL4_6	s+; Act5C-GAL4_6_13
s+; Act5C-GAL4	76	6	14	s+; Act5C-GAL4_6	s+; Act5C-GAL4_6_14
s+; Act5C-GAL4	89	6	15	s+; Act5C-GAL4_6	s+; Act5C-GAL4_6_15
s+; Act5C-GAL4	88	6	16	s+; Act5C-GAL4_6	s+; Act5C-GAL4_6_16
s+; Act5C-GAL4	71	6	17	s+; Act5C-GAL4_6	s+; Act5C-GAL4_6_17
s+; Act5C-GAL4	93	6	18	s+; Act5C-GAL4_6	s+; Act5C-GAL4_6_18
s+; Act5C-GAL4	61	6	19	s+; Act5C-GAL4_6	s+; Act5C-GAL4_6_19
s+; Act5C-GAL4	96	6	20	s+; Act5C-GAL4_6	s+; Act5C-GAL4_6_20
s+; Act5C-GAL4	79	7	1	s+; Act5C-GAL4_7	s+; Act5C-GAL4_7_1
s+; Act5C-GAL4	72	7	2	s+; Act5C-GAL4_7	s+; Act5C-GAL4_7_2
s+; Act5C-GAL4	76	7	3	s+; Act5C-GAL4_7	s+; Act5C-GAL4_7_3
s+; Act5C-GAL4	77	7	4	s+; Act5C-GAL4_7	s+; Act5C-GAL4_7_4
s+; Act5C-GAL4	66	7	5	s+; Act5C-GAL4_7	s+; Act5C-GAL4_7_5
s+; Act5C-GAL4	79	7	6	s+; Act5C-GAL4_7	s+; Act5C-GAL4_7_6
s+; Act5C-GAL4	80	7	7	s+; Act5C-GAL4_7	s+; Act5C-GAL4_7_7
s+; Act5C-GAL4	80	7	8	s+; Act5C-GAL4_7	s+; Act5C-GAL4_7_8
s+; Act5C-GAL4	76	7	9	s+; Act5C-GAL4_7	s+; Act5C-GAL4_7_9
s+; Act5C-GAL4	55	7	10	s+; Act5C-GAL4_7	s+; Act5C-GAL4_7_10
s+; Act5C-GAL4	61	7	11	s+; Act5C-GAL4_7	s+; Act5C-GAL4_7_11
s+; Act5C-GAL4	83	7	12	s+; Act5C-GAL4_7	s+; Act5C-GAL4_7_12
s+; Act5C-GAL4	80	7	13	s+; Act5C-GAL4_7	s+; Act5C-GAL4_7_13
s+; Act5C-GAL4	77	7	14	s+; Act5C-GAL4_7	s+; Act5C-GAL4_7_14
s+; Act5C-GAL4	69	7	15	s+; Act5C-GAL4_7	s+; Act5C-GAL4_7_15
s+; Act5C-GAL4	78	7	16	s+; Act5C-GAL4_7	s+; Act5C-GAL4_7_16
s+; Act5C-GAL4	78	7	17	s+; Act5C-GAL4_7	s+; Act5C-GAL4_7_17
s+; Act5C-GAL4	69	7	18	s+; Act5C-GAL4_7	s+; Act5C-GAL4_7_18
s+; Act5C-GAL4	66	7	19	s+; Act5C-GAL4_7	s+; Act5C-GAL4_7_19
s+; Act5C-GAL4	67	7	20	s+; Act5C-GAL4_7	s+; Act5C-GAL4_7_20
s+; Act5C-GAL4	91	8	1	s+; Act5C-GAL4_8	s+; Act5C-GAL4_8_1
s+; Act5C-GAL4	102	8	2	s+; Act5C-GAL4_8	s+; Act5C-GAL4_8_2
s+; Act5C-GAL4	92	8	3	s+; Act5C-GAL4_8	s+; Act5C-GAL4_8_3
s+; Act5C-GAL4	95	8	4	s+; Act5C-GAL4_8	s+; Act5C-GAL4_8_4
s+; Act5C-GAL4	88	8	5	s+; Act5C-GAL4_8	s+; Act5C-GAL4_8_5
s+; Act5C-GAL4	87	8	6	s+; Act5C-GAL4_8	s+; Act5C-GAL4_8_6
s+; Act5C-GAL4	77	8	7	s+; Act5C-GAL4_8	s+; Act5C-GAL4_8_7
s+; Act5C-GAL4	89	8	8	s+; Act5C-GAL4_8	s+; Act5C-GAL4_8_8
s+; Act5C-GAL4	87	8	9	s+; Act5C-GAL4_8	s+; Act5C-GAL4_8_9
s+; Act5C-GAL4	99	8	10	s+; Act5C-GAL4_8	s+; Act5C-GAL4_8_10
s+; Act5C-GAL4	92	8	11	s+; Act5C-GAL4_8	s+; Act5C-GAL4_8_11
s+; Act5C-GAL4	87	8	12	s+; Act5C-GAL4_8	s+; Act5C-GAL4_8_12
s+; Act5C-GAL4	87	8	13	s+; Act5C-GAL4_8	s+; Act5C-GAL4_8_13
s+; Act5C-GAL4	92	8	14	s+; Act5C-GAL4_8	s+; Act5C-GAL4_8_14
s+; Act5C-GAL4	94	8	15	s+; Act5C-GAL4_8	s+; Act5C-GAL4_8_15
s+; Act5C-GAL4	89	8	16	s+; Act5C-GAL4_8	s+; Act5C-GAL4_8_16
s+; Act5C-GAL4	95	8	17	s+; Act5C-GAL4_8	s+; Act5C-GAL4_8_17
s+; Act5C-GAL4	91	8	18	s+; Act5C-GAL4_8	s+; Act5C-GAL4_8_18
s+; Act5C-GAL4	91	8	19	s+; Act5C-GAL4_8	s+; Act5C-GAL4_8_19
s+; Act5C-GAL4	96	8	20	s+; Act5C-GAL4_8	s+; Act5C-GAL4_8_20
s+; Act5C-GAL4	68	9	1	s+; Act5C-GAL4_9	s+; Act5C-GAL4_9_1
s+; Act5C-GAL4	78	9	2	s+; Act5C-GAL4_9	s+; Act5C-GAL4_9_2
s+; Act5C-GAL4	73	9	3	s+; Act5C-GAL4_9	s+; Act5C-GAL4_9_3
s+; Act5C-GAL4	93	9	4	s+; Act5C-GAL4_9	s+; Act5C-GAL4_9_4
s+; Act5C-GAL4	79	9	5	s+; Act5C-GAL4_9	s+; Act5C-GAL4_9_5
s+; Act5C-GAL4	75	9	6	s+; Act5C-GAL4_9	s+; Act5C-GAL4_9_6
s+; Act5C-GAL4	85	9	7	s+; Act5C-GAL4_9	s+; Act5C-GAL4_9_7
s+; Act5C-GAL4	84	9	8	s+; Act5C-GAL4_9	s+; Act5C-GAL4_9_8
s+; Act5C-GAL4	81	9	9	s+; Act5C-GAL4_9	s+; Act5C-GAL4_9_9
s+; Act5C-GAL4	89	9	10	s+; Act5C-GAL4_9	s+; Act5C-GAL4_9_10
s+; Act5C-GAL4	83	9	11	s+; Act5C-GAL4_9	s+; Act5C-GAL4_9_11
s+; Act5C-GAL4	75	9	12	s+; Act5C-GAL4_9	s+; Act5C-GAL4_9_12
s+; Act5C-GAL4	86	9	13	s+; Act5C-GAL4_9	s+; Act5C-GAL4_9_13
s+; Act5C-GAL4	84	9	14	s+; Act5C-GAL4_9	s+; Act5C-GAL4_9_14
s+; Act5C-GAL4	82	9	15	s+; Act5C-GAL4_9	s+; Act5C-GAL4_9_15
s+; Act5C-GAL4	77	9	16	s+; Act5C-GAL4_9	s+; Act5C-GAL4_9_16
s+; Act5C-GAL4	77	9	17	s+; Act5C-GAL4_9	s+; Act5C-GAL4_9_17
s+; Act5C-GAL4	79	9	18	s+; Act5C-GAL4_9	s+; Act5C-GAL4_9_18
s+; Act5C-GAL4	72	9	19	s+; Act5C-GAL4_9	s+; Act5C-GAL4_9_19
s+; Act5C-GAL4	79	9	20	s+; Act5C-GAL4_9	s+; Act5C-GAL4_9_20
s+; Act5C-GAL4	76	10	1	s+; Act5C-GAL4_10	s+; Act5C-GAL4_10_1
s+; Act5C-GAL4	64	10	2	s+; Act5C-GAL4_10	s+; Act5C-GAL4_10_2
s+; Act5C-GAL4	67	10	3	s+; Act5C-GAL4_10	s+; Act5C-GAL4_10_3
s+; Act5C-GAL4	69	10	4	s+; Act5C-GAL4_10	s+; Act5C-GAL4_10_4
s+; Act5C-GAL4	79	10	5	s+; Act5C-GAL4_10	s+; Act5C-GAL4_10_5
s+; Act5C-GAL4	67	10	6	s+; Act5C-GAL4_10	s+; Act5C-GAL4_10_6
s+; Act5C-GAL4	70	10	7	s+; Act5C-GAL4_10	s+; Act5C-GAL4_10_7
s+; Act5C-GAL4	66	10	8	s+; Act5C-GAL4_10	s+; Act5C-GAL4_10_8
s+; Act5C-GAL4	58	10	9	s+; Act5C-GAL4_10	s+; Act5C-GAL4_10_9
s+; Act5C-GAL4	51	10	10	s+; Act5C-GAL4_10	s+; Act5C-GAL4_10_10
s+; Act5C-GAL4	51	10	11	s+; Act5C-GAL4_10	s+; Act5C-GAL4_10_11
s+; Act5C-GAL4	55	10	12	s+; Act5C-GAL4_10	s+; Act5C-GAL4_10_12
s+; Act5C-GAL4	52	10	13	s+; Act5C-GAL4_10	s+; Act5C-GAL4_10_13
s+; Act5C-GAL4	66	10	14	s+; Act5C-GAL4_10	s+; Act5C-GAL4_10_14
s+; Act5C-GAL4	65	10	15	s+; Act5C-GAL4_10	s+; Act5C-GAL4_10_15
s+; Act5C-GAL4	63	10	16	s+; Act5C-GAL4_10	s+; Act5C-GAL4_10_16
s+; Act5C-GAL4	56	10	17	s+; Act5C-GAL4_10	s+; Act5C-GAL4_10_17
s+; Act5C-GAL4	63	10	18	s+; Act5C-GAL4_10	s+; Act5C-GAL4_10_18
s+; Act5C-GAL4	59	10	19	s+; Act5C-GAL4_10	s+; Act5C-GAL4_10_19
s+; Act5C-GAL4	54	10	20	s+; Act5C-GAL4_10	s+; Act5C-GAL4_10_20
s+; Act5C-GAL4	70	11	1	s+; Act5C-GAL4_11	s+; Act5C-GAL4_11_1
s+; Act5C-GAL4	70	11	2	s+; Act5C-GAL4_11	s+; Act5C-GAL4_11_2
s+; Act5C-GAL4	63	11	3	s+; Act5C-GAL4_11	s+; Act5C-GAL4_11_3
s+; Act5C-GAL4	47	11	4	s+; Act5C-GAL4_11	s+; Act5C-GAL4_11_4
s+; Act5C-GAL4	63	11	5	s+; Act5C-GAL4_11	s+; Act5C-GAL4_11_5
s+; Act5C-GAL4	71	11	6	s+; Act5C-GAL4_11	s+; Act5C-GAL4_11_6
s+; Act5C-GAL4	62	11	7	s+; Act5C-GAL4_11	s+; Act5C-GAL4_11_7
s+; Act5C-GAL4	67	11	8	s+; Act5C-GAL4_11	s+; Act5C-GAL4_11_8
s+; Act5C-GAL4	62	11	9	s+; Act5C-GAL4_11	s+; Act5C-GAL4_11_9
s+; Act5C-GAL4	72	11	10	s+; Act5C-GAL4_11	s+; Act5C-GAL4_11_10
s+; Act5C-GAL4	75	11	11	s+; Act5C-GAL4_11	s+; Act5C-GAL4_11_11
s+; Act5C-GAL4	63	11	12	s+; Act5C-GAL4_11	s+; Act5C-GAL4_11_12
s+; Act5C-GAL4	60	11	13	s+; Act5C-GAL4_11	s+; Act5C-GAL4_11_13
s+; Act5C-GAL4	55	11	14	s+; Act5C-GAL4_11	s+; Act5C-GAL4_11_14
s+; Act5C-GAL4	63	11	15	s+; Act5C-GAL4_11	s+; Act5C-GAL4_11_15
s+; Act5C-GAL4	59	11	16	s+; Act5C-GAL4_11	s+; Act5C-GAL4_11_16
s+; Act5C-GAL4	63	11	17	s+; Act5C-GAL4_11	s+; Act5C-GAL4_11_17
s+; Act5C-GAL4	52	11	18	s+; Act5C-GAL4_11	s+; Act5C-GAL4_11_18
s+; Act5C-GAL4	55	11	19	s+; Act5C-GAL4_11	s+; Act5C-GAL4_11_19
s+; Act5C-GAL4	67	11	20	s+; Act5C-GAL4_11	s+; Act5C-GAL4_11_20
s+; Act5C-GAL4	69	12	1	s+; Act5C-GAL4_12	s+; Act5C-GAL4_12_1
s+; Act5C-GAL4	68	12	2	s+; Act5C-GAL4_12	s+; Act5C-GAL4_12_2
s+; Act5C-GAL4	74	12	3	s+; Act5C-GAL4_12	s+; Act5C-GAL4_12_3
s+; Act5C-GAL4	55	12	4	s+; Act5C-GAL4_12	s+; Act5C-GAL4_12_4
s+; Act5C-GAL4	54	12	5	s+; Act5C-GAL4_12	s+; Act5C-GAL4_12_5
s+; Act5C-GAL4	65	12	6	s+; Act5C-GAL4_12	s+; Act5C-GAL4_12_6
s+; Act5C-GAL4	51	12	7	s+; Act5C-GAL4_12	s+; Act5C-GAL4_12_7
s+; Act5C-GAL4	68	12	8	s+; Act5C-GAL4_12	s+; Act5C-GAL4_12_8
s+; Act5C-GAL4	54	12	9	s+; Act5C-GAL4_12	s+; Act5C-GAL4_12_9
s+; Act5C-GAL4	74	12	10	s+; Act5C-GAL4_12	s+; Act5C-GAL4_12_10
s+; Act5C-GAL4	72	12	11	s+; Act5C-GAL4_12	s+; Act5C-GAL4_12_11
s+; Act5C-GAL4	70	12	12	s+; Act5C-GAL4_12	s+; Act5C-GAL4_12_12
s+; Act5C-GAL4	70	12	13	s+; Act5C-GAL4_12	s+; Act5C-GAL4_12_13
s+; Act5C-GAL4	53	12	14	s+; Act5C-GAL4_12	s+; Act5C-GAL4_12_14
s+; Act5C-GAL4	64	12	15	s+; Act5C-GAL4_12	s+; Act5C-GAL4_12_15
s+; Act5C-GAL4	62	12	16	s+; Act5C-GAL4_12	s+; Act5C-GAL4_12_16
s+; Act5C-GAL4	75	12	17	s+; Act5C-GAL4_12	s+; Act5C-GAL4_12_17
s+; Act5C-GAL4	62	12	18	s+; Act5C-GAL4_12	s+; Act5C-GAL4_12_18
s+; Act5C-GAL4	58	12	19	s+; Act5C-GAL4_12	s+; Act5C-GAL4_12_19
s+; Act5C-GAL4	70	12	20	s+; Act5C-GAL4_12	s+; Act5C-GAL4_12_20
s+; Act5C-GAL4	40	13	1	s+; Act5C-GAL4_13	s+; Act5C-GAL4_13_1
s+; Act5C-GAL4	62	13	2	s+; Act5C-GAL4_13	s+; Act5C-GAL4_13_2
s+; Act5C-GAL4	55	13	3	s+; Act5C-GAL4_13	s+; Act5C-GAL4_13_3
s+; Act5C-GAL4	63	13	4	s+; Act5C-GAL4_13	s+; Act5C-GAL4_13_4
s+; Act5C-GAL4	77	13	5	s+; Act5C-GAL4_13	s+; Act5C-GAL4_13_5
s+; Act5C-GAL4	77	13	6	s+; Act5C-GAL4_13	s+; Act5C-GAL4_13_6
s+; Act5C-GAL4	50	13	7	s+; Act5C-GAL4_13	s+; Act5C-GAL4_13_7
s+; Act5C-GAL4	60	13	8	s+; Act5C-GAL4_13	s+; Act5C-GAL4_13_8
s+; Act5C-GAL4	69	13	9	s+; Act5C-GAL4_13	s+; Act5C-GAL4_13_9
s+; Act5C-GAL4	65	13	10	s+; Act5C-GAL4_13	s+; Act5C-GAL4_13_10
s+; Act5C-GAL4	59	13	11	s+; Act5C-GAL4_13	s+; Act5C-GAL4_13_11
s+; Act5C-GAL4	74	13	12	s+; Act5C-GAL4_13	s+; Act5C-GAL4_13_12
s+; Act5C-GAL4	57	13	13	s+; Act5C-GAL4_13	s+; Act5C-GAL4_13_13
s+; Act5C-GAL4	54	13	14	s+; Act5C-GAL4_13	s+; Act5C-GAL4_13_14
s+; Act5C-GAL4	57	13	15	s+; Act5C-GAL4_13	s+; Act5C-GAL4_13_15
s+; Act5C-GAL4	63	13	16	s+; Act5C-GAL4_13	s+; Act5C-GAL4_13_16
s+; Act5C-GAL4	53	13	17	s+; Act5C-GAL4_13	s+; Act5C-GAL4_13_17
s+; Act5C-GAL4	66	13	18	s+; Act5C-GAL4_13	s+; Act5C-GAL4_13_18
s+; Act5C-GAL4	67	13	19	s+; Act5C-GAL4_13	s+; Act5C-GAL4_13_19
s+; Act5C-GAL4	53	13	20	s+; Act5C-GAL4_13	s+; Act5C-GAL4_13_20
s+; Act5C-GAL4	85	14	1	s+; Act5C-GAL4_14	s+; Act5C-GAL4_14_1
s+; Act5C-GAL4	86	14	2	s+; Act5C-GAL4_14	s+; Act5C-GAL4_14_2
s+; Act5C-GAL4	70	14	3	s+; Act5C-GAL4_14	s+; Act5C-GAL4_14_3
s+; Act5C-GAL4	81	14	4	s+; Act5C-GAL4_14	s+; Act5C-GAL4_14_4
s+; Act5C-GAL4	98	14	5	s+; Act5C-GAL4_14	s+; Act5C-GAL4_14_5
s+; Act5C-GAL4	81	14	6	s+; Act5C-GAL4_14	s+; Act5C-GAL4_14_6
s+; Act5C-GAL4	81	14	7	s+; Act5C-GAL4_14	s+; Act5C-GAL4_14_7
s+; Act5C-GAL4	70	14	8	s+; Act5C-GAL4_14	s+; Act5C-GAL4_14_8
s+; Act5C-GAL4	92	14	9	s+; Act5C-GAL4_14	s+; Act5C-GAL4_14_9
s+; Act5C-GAL4	95	14	10	s+; Act5C-GAL4_14	s+; Act5C-GAL4_14_10
s+; Act5C-GAL4	97	14	11	s+; Act5C-GAL4_14	s+; Act5C-GAL4_14_11
s+; Act5C-GAL4	90	14	12	s+; Act5C-GAL4_14	s+; Act5C-GAL4_14_12
s+; Act5C-GAL4	95	14	13	s+; Act5C-GAL4_14	s+; Act5C-GAL4_14_13
s+; Act5C-GAL4	95	14	14	s+; Act5C-GAL4_14	s+; Act5C-GAL4_14_14
s+; Act5C-GAL4	90	14	15	s+; Act5C-GAL4_14	s+; Act5C-GAL4_14_15
s+; Act5C-GAL4	98	14	16	s+; Act5C-GAL4_14	s+; Act5C-GAL4_14_16
s+; Act5C-GAL4	63	14	17	s+; Act5C-GAL4_14	s+; Act5C-GAL4_14_17
s+; Act5C-GAL4	96	14	18	s+; Act5C-GAL4_14	s+; Act5C-GAL4_14_18
s+; Act5C-GAL4	68	14	19	s+; Act5C-GAL4_14	s+; Act5C-GAL4_14_19
s+; Act5C-GAL4	88	14	20	s+; Act5C-GAL4_14	s+; Act5C-GAL4_14_20
s+; Act5C-GAL4	58	15	1	s+; Act5C-GAL4_15	s+; Act5C-GAL4_15_1
s+; Act5C-GAL4	60	15	2	s+; Act5C-GAL4_15	s+; Act5C-GAL4_15_2
s+; Act5C-GAL4	72	15	3	s+; Act5C-GAL4_15	s+; Act5C-GAL4_15_3
s+; Act5C-GAL4	79	15	4	s+; Act5C-GAL4_15	s+; Act5C-GAL4_15_4
s+; Act5C-GAL4	60	15	5	s+; Act5C-GAL4_15	s+; Act5C-GAL4_15_5
s+; Act5C-GAL4	66	15	6	s+; Act5C-GAL4_15	s+; Act5C-GAL4_15_6
s+; Act5C-GAL4	55	15	7	s+; Act5C-GAL4_15	s+; Act5C-GAL4_15_7
s+; Act5C-GAL4	53	15	8	s+; Act5C-GAL4_15	s+; Act5C-GAL4_15_8
s+; Act5C-GAL4	51	15	9	s+; Act5C-GAL4_15	s+; Act5C-GAL4_15_9
s+; Act5C-GAL4	48	15	10	s+; Act5C-GAL4_15	s+; Act5C-GAL4_15_10
s+; Act5C-GAL4	57	15	11	s+; Act5C-GAL4_15	s+; Act5C-GAL4_15_11
s+; Act5C-GAL4	61	15	12	s+; Act5C-GAL4_15	s+; Act5C-GAL4_15_12
s+; Act5C-GAL4	64	15	13	s+; Act5C-GAL4_15	s+; Act5C-GAL4_15_13
s+; Act5C-GAL4	61	15	14	s+; Act5C-GAL4_15	s+; Act5C-GAL4_15_14
s+; Act5C-GAL4	58	15	15	s+; Act5C-GAL4_15	s+; Act5C-GAL4_15_15
s+; Act5C-GAL4	59	15	16	s+; Act5C-GAL4_15	s+; Act5C-GAL4_15_16
s+; Act5C-GAL4	67	15	17	s+; Act5C-GAL4_15	s+; Act5C-GAL4_15_17
s+; Act5C-GAL4	57	15	18	s+; Act5C-GAL4_15	s+; Act5C-GAL4_15_18
s+; Act5C-GAL4	58	15	19	s+; Act5C-GAL4_15	s+; Act5C-GAL4_15_19
s+; Act5C-GAL4	55	15	20	s+; Act5C-GAL4_15	s+; Act5C-GAL4_15_20
s+; Act5C-GAL4	83	16	1	s+; Act5C-GAL4_16	s+; Act5C-GAL4_16_1
s+; Act5C-GAL4	84	16	2	s+; Act5C-GAL4_16	s+; Act5C-GAL4_16_2
s+; Act5C-GAL4	108	16	3	s+; Act5C-GAL4_16	s+; Act5C-GAL4_16_3
s+; Act5C-GAL4	89	16	4	s+; Act5C-GAL4_16	s+; Act5C-GAL4_16_4
s+; Act5C-GAL4	100	16	5	s+; Act5C-GAL4_16	s+; Act5C-GAL4_16_5
s+; Act5C-GAL4	79	16	6	s+; Act5C-GAL4_16	s+; Act5C-GAL4_16_6
s+; Act5C-GAL4	85	16	7	s+; Act5C-GAL4_16	s+; Act5C-GAL4_16_7
s+; Act5C-GAL4	93	16	8	s+; Act5C-GAL4_16	s+; Act5C-GAL4_16_8
s+; Act5C-GAL4	90	16	9	s+; Act5C-GAL4_16	s+; Act5C-GAL4_16_9
s+; Act5C-GAL4	98	16	10	s+; Act5C-GAL4_16	s+; Act5C-GAL4_16_10
s+; Act5C-GAL4	92	16	11	s+; Act5C-GAL4_16	s+; Act5C-GAL4_16_11
s+; Act5C-GAL4	55	16	12	s+; Act5C-GAL4_16	s+; Act5C-GAL4_16_12
s+; Act5C-GAL4	89	16	13	s+; Act5C-GAL4_16	s+; Act5C-GAL4_16_13
s+; Act5C-GAL4	99	16	14	s+; Act5C-GAL4_16	s+; Act5C-GAL4_16_14
s+; Act5C-GAL4	104	16	15	s+; Act5C-GAL4_16	s+; Act5C-GAL4_16_15
s+; Act5C-GAL4	91	16	16	s+; Act5C-GAL4_16	s+; Act5C-GAL4_16_16
s+; Act5C-GAL4	85	16	17	s+; Act5C-GAL4_16	s+; Act5C-GAL4_16_17
s+; Act5C-GAL4	105	16	18	s+; Act5C-GAL4_16	s+; Act5C-GAL4_16_18
s+; Act5C-GAL4	103	16	19	s+; Act5C-GAL4_16	s+; Act5C-GAL4_16_19
s+; Act5C-GAL4	91	16	20	s+; Act5C-GAL4_16	s+; Act5C-GAL4_16_20
s+; Act5C-GAL4	75	17	1	s+; Act5C-GAL4_17	s+; Act5C-GAL4_17_1
s+; Act5C-GAL4	80	17	2	s+; Act5C-GAL4_17	s+; Act5C-GAL4_17_2
s+; Act5C-GAL4	64	17	3	s+; Act5C-GAL4_17	s+; Act5C-GAL4_17_3
s+; Act5C-GAL4	77	17	4	s+; Act5C-GAL4_17	s+; Act5C-GAL4_17_4
s+; Act5C-GAL4	71	17	5	s+; Act5C-GAL4_17	s+; Act5C-GAL4_17_5
s+; Act5C-GAL4	77	17	6	s+; Act5C-GAL4_17	s+; Act5C-GAL4_17_6
s+; Act5C-GAL4	73	17	7	s+; Act5C-GAL4_17	s+; Act5C-GAL4_17_7
s+; Act5C-GAL4	71	17	8	s+; Act5C-GAL4_17	s+; Act5C-GAL4_17_8
s+; Act5C-GAL4	77	17	9	s+; Act5C-GAL4_17	s+; Act5C-GAL4_17_9
s+; Act5C-GAL4	75	17	10	s+; Act5C-GAL4_17	s+; Act5C-GAL4_17_10
s+; Act5C-GAL4	74	17	11	s+; Act5C-GAL4_17	s+; Act5C-GAL4_17_11
s+; Act5C-GAL4	74	17	12	s+; Act5C-GAL4_17	s+; Act5C-GAL4_17_12
s+; Act5C-GAL4	73	17	13	s+; Act5C-GAL4_17	s+; Act5C-GAL4_17_13
s+; Act5C-GAL4	79	17	14	s+; Act5C-GAL4_17	s+; Act5C-GAL4_17_14
s+; Act5C-GAL4	72	17	15	s+; Act5C-GAL4_17	s+; Act5C-GAL4_17_15
s+; Act5C-GAL4	69	17	16	s+; Act5C-GAL4_17	s+; Act5C-GAL4_17_16
s+; Act5C-GAL4	78	17	17	s+; Act5C-GAL4_17	s+; Act5C-GAL4_17_17
s+; Act5C-GAL4	72	17	18	s+; Act5C-GAL4_17	s+; Act5C-GAL4_17_18
s+; Act5C-GAL4	72	17	19	s+; Act5C-GAL4_17	s+; Act5C-GAL4_17_19
s+; Act5C-GAL4	73	17	20	s+; Act5C-GAL4_17	s+; Act5C-GAL4_17_20
s+; Act5C-GAL4	85	18	1	s+; Act5C-GAL4_18	s+; Act5C-GAL4_18_1
s+; Act5C-GAL4	90	18	2	s+; Act5C-GAL4_18	s+; Act5C-GAL4_18_2
s+; Act5C-GAL4	96	18	3	s+; Act5C-GAL4_18	s+; Act5C-GAL4_18_3
s+; Act5C-GAL4	97	18	4	s+; Act5C-GAL4_18	s+; Act5C-GAL4_18_4
s+; Act5C-GAL4	83	18	5	s+; Act5C-GAL4_18	s+; Act5C-GAL4_18_5
s+; Act5C-GAL4	90	18	6	s+; Act5C-GAL4_18	s+; Act5C-GAL4_18_6
s+; Act5C-GAL4	94	18	7	s+; Act5C-GAL4_18	s+; Act5C-GAL4_18_7
s+; Act5C-GAL4	88	18	8	s+; Act5C-GAL4_18	s+; Act5C-GAL4_18_8
s+; Act5C-GAL4	97	18	9	s+; Act5C-GAL4_18	s+; Act5C-GAL4_18_9
s+; Act5C-GAL4	71	18	10	s+; Act5C-GAL4_18	s+; Act5C-GAL4_18_10
s+; Act5C-GAL4	85	18	11	s+; Act5C-GAL4_18	s+; Act5C-GAL4_18_11
s+; Act5C-GAL4	80	18	12	s+; Act5C-GAL4_18	s+; Act5C-GAL4_18_12
s+; Act5C-GAL4	80	18	13	s+; Act5C-GAL4_18	s+; Act5C-GAL4_18_13
s+; Act5C-GAL4	76	18	14	s+; Act5C-GAL4_18	s+; Act5C-GAL4_18_14
s+; Act5C-GAL4	87	18	15	s+; Act5C-GAL4_18	s+; Act5C-GAL4_18_15
s+; Act5C-GAL4	78	18	16	s+; Act5C-GAL4_18	s+; Act5C-GAL4_18_16
s+; Act5C-GAL4	70	18	17	s+; Act5C-GAL4_18	s+; Act5C-GAL4_18_17
s+; Act5C-GAL4	74	18	18	s+; Act5C-GAL4_18	s+; Act5C-GAL4_18_18
s+; Act5C-GAL4	74	18	19	s+; Act5C-GAL4_18	s+; Act5C-GAL4_18_19
s+; Act5C-GAL4	81	18	20	s+; Act5C-GAL4_18	s+; Act5C-GAL4_18_20
s+; Act5C-GAL4	63	19	1	s+; Act5C-GAL4_19	s+; Act5C-GAL4_19_1
s+; Act5C-GAL4	62	19	2	s+; Act5C-GAL4_19	s+; Act5C-GAL4_19_2
s+; Act5C-GAL4	65	19	3	s+; Act5C-GAL4_19	s+; Act5C-GAL4_19_3
s+; Act5C-GAL4	69	19	4	s+; Act5C-GAL4_19	s+; Act5C-GAL4_19_4
s+; Act5C-GAL4	61	19	5	s+; Act5C-GAL4_19	s+; Act5C-GAL4_19_5
s+; Act5C-GAL4	59	19	6	s+; Act5C-GAL4_19	s+; Act5C-GAL4_19_6
s+; Act5C-GAL4	59	19	7	s+; Act5C-GAL4_19	s+; Act5C-GAL4_19_7
s+; Act5C-GAL4	59	19	8	s+; Act5C-GAL4_19	s+; Act5C-GAL4_19_8
s+; Act5C-GAL4	66	19	9	s+; Act5C-GAL4_19	s+; Act5C-GAL4_19_9
s+; Act5C-GAL4	62	19	10	s+; Act5C-GAL4_19	s+; Act5C-GAL4_19_10
s+; Act5C-GAL4	62	19	11	s+; Act5C-GAL4_19	s+; Act5C-GAL4_19_11
s+; Act5C-GAL4	71	19	12	s+; Act5C-GAL4_19	s+; Act5C-GAL4_19_12
s+; Act5C-GAL4	71	19	13	s+; Act5C-GAL4_19	s+; Act5C-GAL4_19_13
s+; Act5C-GAL4	80	19	14	s+; Act5C-GAL4_19	s+; Act5C-GAL4_19_14
s+; Act5C-GAL4	80	19	15	s+; Act5C-GAL4_19	s+; Act5C-GAL4_19_15
s+; Act5C-GAL4	60	19	16	s+; Act5C-GAL4_19	s+; Act5C-GAL4_19_16
s+; Act5C-GAL4	60	19	17	s+; Act5C-GAL4_19	s+; Act5C-GAL4_19_17
s+; Act5C-GAL4	66	19	18	s+; Act5C-GAL4_19	s+; Act5C-GAL4_19_18
s+; Act5C-GAL4	70	19	19	s+; Act5C-GAL4_19	s+; Act5C-GAL4_19_19
s+; Act5C-GAL4	57	19	20	s+; Act5C-GAL4_19	s+; Act5C-GAL4_19_20
s+; Act5C-GAL4	76	20	1	s+; Act5C-GAL4_20	s+; Act5C-GAL4_20_1
s+; Act5C-GAL4	84	20	2	s+; Act5C-GAL4_20	s+; Act5C-GAL4_20_2
s+; Act5C-GAL4	76	20	3	s+; Act5C-GAL4_20	s+; Act5C-GAL4_20_3
s+; Act5C-GAL4	74	20	4	s+; Act5C-GAL4_20	s+; Act5C-GAL4_20_4
s+; Act5C-GAL4	74	20	5	s+; Act5C-GAL4_20	s+; Act5C-GAL4_20_5
s+; Act5C-GAL4	65	20	6	s+; Act5C-GAL4_20	s+; Act5C-GAL4_20_6
s+; Act5C-GAL4	81	20	7	s+; Act5C-GAL4_20	s+; Act5C-GAL4_20_7
s+; Act5C-GAL4	84	20	8	s+; Act5C-GAL4_20	s+; Act5C-GAL4_20_8
s+; Act5C-GAL4	89	20	9	s+; Act5C-GAL4_20	s+; Act5C-GAL4_20_9
s+; Act5C-GAL4	89	20	10	s+; Act5C-GAL4_20	s+; Act5C-GAL4_20_10
s+; Act5C-GAL4	55	20	11	s+; Act5C-GAL4_20	s+; Act5C-GAL4_20_11
s+; Act5C-GAL4	71	20	12	s+; Act5C-GAL4_20	s+; Act5C-GAL4_20_12
s+; Act5C-GAL4	77	20	13	s+; Act5C-GAL4_20	s+; Act5C-GAL4_20_13
s+; Act5C-GAL4	74	20	14	s+; Act5C-GAL4_20	s+; Act5C-GAL4_20_14
s+; Act5C-GAL4	54	20	15	s+; Act5C-GAL4_20	s+; Act5C-GAL4_20_15
s+; Act5C-GAL4	69	20	16	s+; Act5C-GAL4_20	s+; Act5C-GAL4_20_16
s+; Act5C-GAL4	83	20	17	s+; Act5C-GAL4_20	s+; Act5C-GAL4_20_17
s+; Act5C-GAL4	73	20	18	s+; Act5C-GAL4_20	s+; Act5C-GAL4_20_18
s+; Act5C-GAL4	81	20	19	s+; Act5C-GAL4_20	s+; Act5C-GAL4_20_19
s+; Act5C-GAL4	81	20	20	s+; Act5C-GAL4_20	s+; Act5C-GAL4_20_20
s+; Act5C-GAL4	77	21	1	s+; Act5C-GAL4_21	s+; Act5C-GAL4_21_1
s+; Act5C-GAL4	77	21	2	s+; Act5C-GAL4_21	s+; Act5C-GAL4_21_2
s+; Act5C-GAL4	73	21	3	s+; Act5C-GAL4_21	s+; Act5C-GAL4_21_3
s+; Act5C-GAL4	82	21	4	s+; Act5C-GAL4_21	s+; Act5C-GAL4_21_4
s+; Act5C-GAL4	89	21	5	s+; Act5C-GAL4_21	s+; Act5C-GAL4_21_5
s+; Act5C-GAL4	91	21	6	s+; Act5C-GAL4_21	s+; Act5C-GAL4_21_6
s+; Act5C-GAL4	81	21	7	s+; Act5C-GAL4_21	s+; Act5C-GAL4_21_7
s+; Act5C-GAL4	86	21	8	s+; Act5C-GAL4_21	s+; Act5C-GAL4_21_8
s+; Act5C-GAL4	93	21	9	s+; Act5C-GAL4_21	s+; Act5C-GAL4_21_9
s+; Act5C-GAL4	83	21	10	s+; Act5C-GAL4_21	s+; Act5C-GAL4_21_10
s+; Act5C-GAL4	86	21	11	s+; Act5C-GAL4_21	s+; Act5C-GAL4_21_11
s+; Act5C-GAL4	74	21	12	s+; Act5C-GAL4_21	s+; Act5C-GAL4_21_12
s+; Act5C-GAL4	87	21	13	s+; Act5C-GAL4_21	s+; Act5C-GAL4_21_13
s+; Act5C-GAL4	94	21	14	s+; Act5C-GAL4_21	s+; Act5C-GAL4_21_14
s+; Act5C-GAL4	77	21	15	s+; Act5C-GAL4_21	s+; Act5C-GAL4_21_15
s+; Act5C-GAL4	84	21	16	s+; Act5C-GAL4_21	s+; Act5C-GAL4_21_16
s+; Act5C-GAL4	80	21	17	s+; Act5C-GAL4_21	s+; Act5C-GAL4_21_17
s+; Act5C-GAL4	95	21	18	s+; Act5C-GAL4_21	s+; Act5C-GAL4_21_18
s+; Act5C-GAL4	94	21	19	s+; Act5C-GAL4_21	s+; Act5C-GAL4_21_19
s+; Act5C-GAL4	100	21	20	s+; Act5C-GAL4_21	s+; Act5C-GAL4_21_20
s+; Act5C-GAL4	37	22	1	s+; Act5C-GAL4_22	s+; Act5C-GAL4_22_1
s+; Act5C-GAL4	51	22	2	s+; Act5C-GAL4_22	s+; Act5C-GAL4_22_2
s+; Act5C-GAL4	65	22	3	s+; Act5C-GAL4_22	s+; Act5C-GAL4_22_3
s+; Act5C-GAL4	60	22	4	s+; Act5C-GAL4_22	s+; Act5C-GAL4_22_4
s+; Act5C-GAL4	64	22	5	s+; Act5C-GAL4_22	s+; Act5C-GAL4_22_5
s+; Act5C-GAL4	68	22	6	s+; Act5C-GAL4_22	s+; Act5C-GAL4_22_6
s+; Act5C-GAL4	51	22	7	s+; Act5C-GAL4_22	s+; Act5C-GAL4_22_7
s+; Act5C-GAL4	61	22	8	s+; Act5C-GAL4_22	s+; Act5C-GAL4_22_8
s+; Act5C-GAL4	64	22	9	s+; Act5C-GAL4_22	s+; Act5C-GAL4_22_9
s+; Act5C-GAL4	62	22	10	s+; Act5C-GAL4_22	s+; Act5C-GAL4_22_10
s+; Act5C-GAL4	57	22	11	s+; Act5C-GAL4_22	s+; Act5C-GAL4_22_11
s+; Act5C-GAL4	64	22	12	s+; Act5C-GAL4_22	s+; Act5C-GAL4_22_12
s+; Act5C-GAL4	66	22	13	s+; Act5C-GAL4_22	s+; Act5C-GAL4_22_13
s+; Act5C-GAL4	69	22	14	s+; Act5C-GAL4_22	s+; Act5C-GAL4_22_14
s+; Act5C-GAL4	61	22	15	s+; Act5C-GAL4_22	s+; Act5C-GAL4_22_15
s+; Act5C-GAL4	43	22	16	s+; Act5C-GAL4_22	s+; Act5C-GAL4_22_16
s+; Act5C-GAL4	59	22	17	s+; Act5C-GAL4_22	s+; Act5C-GAL4_22_17
s+; Act5C-GAL4	70	22	18	s+; Act5C-GAL4_22	s+; Act5C-GAL4_22_18
s+; Act5C-GAL4	56	22	19	s+; Act5C-GAL4_22	s+; Act5C-GAL4_22_19
s+; Act5C-GAL4	72	22	20	s+; Act5C-GAL4_22	s+; Act5C-GAL4_22_20
s+; Act5C-GAL4	60	23	1	s+; Act5C-GAL4_23	s+; Act5C-GAL4_23_1
s+; Act5C-GAL4	67	23	2	s+; Act5C-GAL4_23	s+; Act5C-GAL4_23_2
s+; Act5C-GAL4	65	23	3	s+; Act5C-GAL4_23	s+; Act5C-GAL4_23_3
s+; Act5C-GAL4	76	23	4	s+; Act5C-GAL4_23	s+; Act5C-GAL4_23_4
s+; Act5C-GAL4	81	23	5	s+; Act5C-GAL4_23	s+; Act5C-GAL4_23_5
s+; Act5C-GAL4	81	23	6	s+; Act5C-GAL4_23	s+; Act5C-GAL4_23_6
s+; Act5C-GAL4	83	23	7	s+; Act5C-GAL4_23	s+; Act5C-GAL4_23_7
s+; Act5C-GAL4	75	23	8	s+; Act5C-GAL4_23	s+; Act5C-GAL4_23_8
s+; Act5C-GAL4	74	23	9	s+; Act5C-GAL4_23	s+; Act5C-GAL4_23_9
s+; Act5C-GAL4	61	23	10	s+; Act5C-GAL4_23	s+; Act5C-GAL4_23_10
s+; Act5C-GAL4	56	23	11	s+; Act5C-GAL4_23	s+; Act5C-GAL4_23_11
s+; Act5C-GAL4	46	23	12	s+; Act5C-GAL4_23	s+; Act5C-GAL4_23_12
s+; Act5C-GAL4	63	23	13	s+; Act5C-GAL4_23	s+; Act5C-GAL4_23_13
s+; Act5C-GAL4	54	23	14	s+; Act5C-GAL4_23	s+; Act5C-GAL4_23_14
s+; Act5C-GAL4	70	23	15	s+; Act5C-GAL4_23	s+; Act5C-GAL4_23_15
s+; Act5C-GAL4	68	23	16	s+; Act5C-GAL4_23	s+; Act5C-GAL4_23_16
s+; Act5C-GAL4	66	23	17	s+; Act5C-GAL4_23	s+; Act5C-GAL4_23_17
s+; Act5C-GAL4	79	23	18	s+; Act5C-GAL4_23	s+; Act5C-GAL4_23_18
s+; Act5C-GAL4	64	23	19	s+; Act5C-GAL4_23	s+; Act5C-GAL4_23_19
s+; Act5C-GAL4	78	23	20	s+; Act5C-GAL4_23	s+; Act5C-GAL4_23_20
s+; Act5C-GAL4	92	24	1	s+; Act5C-GAL4_24	s+; Act5C-GAL4_24_1
s+; Act5C-GAL4	87	24	2	s+; Act5C-GAL4_24	s+; Act5C-GAL4_24_2
s+; Act5C-GAL4	92	24	3	s+; Act5C-GAL4_24	s+; Act5C-GAL4_24_3
s+; Act5C-GAL4	94	24	4	s+; Act5C-GAL4_24	s+; Act5C-GAL4_24_4
s+; Act5C-GAL4	88	24	5	s+; Act5C-GAL4_24	s+; Act5C-GAL4_24_5
s+; Act5C-GAL4	90	24	6	s+; Act5C-GAL4_24	s+; Act5C-GAL4_24_6
s+; Act5C-GAL4	81	24	7	s+; Act5C-GAL4_24	s+; Act5C-GAL4_24_7
s+; Act5C-GAL4	85	24	8	s+; Act5C-GAL4_24	s+; Act5C-GAL4_24_8
s+; Act5C-GAL4	86	24	9	s+; Act5C-GAL4_24	s+; Act5C-GAL4_24_9
s+; Act5C-GAL4	79	24	10	s+; Act5C-GAL4_24	s+; Act5C-GAL4_24_10
s+; Act5C-GAL4	82	24	11	s+; Act5C-GAL4_24	s+; Act5C-GAL4_24_11
s+; Act5C-GAL4	78	24	12	s+; Act5C-GAL4_24	s+; Act5C-GAL4_24_12
s+; Act5C-GAL4	94	24	13	s+; Act5C-GAL4_24	s+; Act5C-GAL4_24_13
s+; Act5C-GAL4	107	24	14	s+; Act5C-GAL4_24	s+; Act5C-GAL4_24_14
s+; Act5C-GAL4	98	24	15	s+; Act5C-GAL4_24	s+; Act5C-GAL4_24_15
s+; Act5C-GAL4	98	24	16	s+; Act5C-GAL4_24	s+; Act5C-GAL4_24_16
s+; Act5C-GAL4	89	24	17	s+; Act5C-GAL4_24	s+; Act5C-GAL4_24_17
s+; Act5C-GAL4	101	24	18	s+; Act5C-GAL4_24	s+; Act5C-GAL4_24_18
s+; Act5C-GAL4	84	24	19	s+; Act5C-GAL4_24	s+; Act5C-GAL4_24_19
s+; Act5C-GAL4	82	24	20	s+; Act5C-GAL4_24	s+; Act5C-GAL4_24_20
s+; Act5C-GAL4	80	25	1	s+; Act5C-GAL4_25	s+; Act5C-GAL4_25_1
s+; Act5C-GAL4	74	25	2	s+; Act5C-GAL4_25	s+; Act5C-GAL4_25_2
s+; Act5C-GAL4	74	25	3	s+; Act5C-GAL4_25	s+; Act5C-GAL4_25_3
s+; Act5C-GAL4	54	25	4	s+; Act5C-GAL4_25	s+; Act5C-GAL4_25_4
s+; Act5C-GAL4	85	25	5	s+; Act5C-GAL4_25	s+; Act5C-GAL4_25_5
s+; Act5C-GAL4	81	25	6	s+; Act5C-GAL4_25	s+; Act5C-GAL4_25_6
s+; Act5C-GAL4	75	25	7	s+; Act5C-GAL4_25	s+; Act5C-GAL4_25_7
s+; Act5C-GAL4	73	25	8	s+; Act5C-GAL4_25	s+; Act5C-GAL4_25_8
s+; Act5C-GAL4	49	25	9	s+; Act5C-GAL4_25	s+; Act5C-GAL4_25_9
s+; Act5C-GAL4	54	25	10	s+; Act5C-GAL4_25	s+; Act5C-GAL4_25_10
s+; Act5C-GAL4	58	25	11	s+; Act5C-GAL4_25	s+; Act5C-GAL4_25_11
s+; Act5C-GAL4	58	25	12	s+; Act5C-GAL4_25	s+; Act5C-GAL4_25_12
s+; Act5C-GAL4	61	25	13	s+; Act5C-GAL4_25	s+; Act5C-GAL4_25_13
s+; Act5C-GAL4	58	25	14	s+; Act5C-GAL4_25	s+; Act5C-GAL4_25_14
s+; Act5C-GAL4	68	25	15	s+; Act5C-GAL4_25	s+; Act5C-GAL4_25_15
s+; Act5C-GAL4	70	25	16	s+; Act5C-GAL4_25	s+; Act5C-GAL4_25_16
s+; Act5C-GAL4	72	25	17	s+; Act5C-GAL4_25	s+; Act5C-GAL4_25_17
s+; Act5C-GAL4	88	25	18	s+; Act5C-GAL4_25	s+; Act5C-GAL4_25_18
s+; Act5C-GAL4	78	25	19	s+; Act5C-GAL4_25	s+; Act5C-GAL4_25_19
s+; Act5C-GAL4	84	25	20	s+; Act5C-GAL4_25	s+; Act5C-GAL4_25_20
s+; Act5C-GAL4	80	26	1	s+; Act5C-GAL4_26	s+; Act5C-GAL4_26_1
s+; Act5C-GAL4	61	26	2	s+; Act5C-GAL4_26	s+; Act5C-GAL4_26_2
s+; Act5C-GAL4	63	26	3	s+; Act5C-GAL4_26	s+; Act5C-GAL4_26_3
s+; Act5C-GAL4	71	26	4	s+; Act5C-GAL4_26	s+; Act5C-GAL4_26_4
s+; Act5C-GAL4	72	26	5	s+; Act5C-GAL4_26	s+; Act5C-GAL4_26_5
s+; Act5C-GAL4	64	26	6	s+; Act5C-GAL4_26	s+; Act5C-GAL4_26_6
s+; Act5C-GAL4	71	26	7	s+; Act5C-GAL4_26	s+; Act5C-GAL4_26_7
s+; Act5C-GAL4	73	26	8	s+; Act5C-GAL4_26	s+; Act5C-GAL4_26_8
s+; Act5C-GAL4	63	26	9	s+; Act5C-GAL4_26	s+; Act5C-GAL4_26_9
s+; Act5C-GAL4	55	26	10	s+; Act5C-GAL4_26	s+; Act5C-GAL4_26_10
s+; Act5C-GAL4	64	26	11	s+; Act5C-GAL4_26	s+; Act5C-GAL4_26_11
s+; Act5C-GAL4	69	26	12	s+; Act5C-GAL4_26	s+; Act5C-GAL4_26_12
s+; Act5C-GAL4	67	26	13	s+; Act5C-GAL4_26	s+; Act5C-GAL4_26_13
s+; Act5C-GAL4	58	26	14	s+; Act5C-GAL4_26	s+; Act5C-GAL4_26_14
s+; Act5C-GAL4	66	26	15	s+; Act5C-GAL4_26	s+; Act5C-GAL4_26_15
s+; Act5C-GAL4	56	26	16	s+; Act5C-GAL4_26	s+; Act5C-GAL4_26_16
s+; Act5C-GAL4	69	26	17	s+; Act5C-GAL4_26	s+; Act5C-GAL4_26_17
s+; Act5C-GAL4	56	26	18	s+; Act5C-GAL4_26	s+; Act5C-GAL4_26_18
s+; Act5C-GAL4	63	26	19	s+; Act5C-GAL4_26	s+; Act5C-GAL4_26_19
s+; Act5C-GAL4	62	26	20	s+; Act5C-GAL4_26	s+; Act5C-GAL4_26_20
s+; Act5C-GAL4	84	27	1	s+; Act5C-GAL4_27	s+; Act5C-GAL4_27_1
s+; Act5C-GAL4	78	27	2	s+; Act5C-GAL4_27	s+; Act5C-GAL4_27_2
s+; Act5C-GAL4	81	27	3	s+; Act5C-GAL4_27	s+; Act5C-GAL4_27_3
s+; Act5C-GAL4	78	27	4	s+; Act5C-GAL4_27	s+; Act5C-GAL4_27_4
s+; Act5C-GAL4	78	27	5	s+; Act5C-GAL4_27	s+; Act5C-GAL4_27_5
s+; Act5C-GAL4	86	27	6	s+; Act5C-GAL4_27	s+; Act5C-GAL4_27_6
s+; Act5C-GAL4	72	27	7	s+; Act5C-GAL4_27	s+; Act5C-GAL4_27_7
s+; Act5C-GAL4	69	27	8	s+; Act5C-GAL4_27	s+; Act5C-GAL4_27_8
s+; Act5C-GAL4	90	27	9	s+; Act5C-GAL4_27	s+; Act5C-GAL4_27_9
s+; Act5C-GAL4	87	27	10	s+; Act5C-GAL4_27	s+; Act5C-GAL4_27_10
s+; Act5C-GAL4	93	27	11	s+; Act5C-GAL4_27	s+; Act5C-GAL4_27_11
s+; Act5C-GAL4	94	27	12	s+; Act5C-GAL4_27	s+; Act5C-GAL4_27_12
s+; Act5C-GAL4	88	27	13	s+; Act5C-GAL4_27	s+; Act5C-GAL4_27_13
s+; Act5C-GAL4	80	27	14	s+; Act5C-GAL4_27	s+; Act5C-GAL4_27_14
s+; Act5C-GAL4	82	27	15	s+; Act5C-GAL4_27	s+; Act5C-GAL4_27_15
s+; Act5C-GAL4	85	27	16	s+; Act5C-GAL4_27	s+; Act5C-GAL4_27_16
s+; Act5C-GAL4	85	27	17	s+; Act5C-GAL4_27	s+; Act5C-GAL4_27_17
s+; Act5C-GAL4	83	27	18	s+; Act5C-GAL4_27	s+; Act5C-GAL4_27_18
s+; Act5C-GAL4	76	27	19	s+; Act5C-GAL4_27	s+; Act5C-GAL4_27_19
s+; Act5C-GAL4	58	27	20	s+; Act5C-GAL4_27	s+; Act5C-GAL4_27_20
s+; Act5C-GAL4	93	28	1	s+; Act5C-GAL4_28	s+; Act5C-GAL4_28_1
s+; Act5C-GAL4	97	28	2	s+; Act5C-GAL4_28	s+; Act5C-GAL4_28_2
s+; Act5C-GAL4	92	28	3	s+; Act5C-GAL4_28	s+; Act5C-GAL4_28_3
s+; Act5C-GAL4	95	28	4	s+; Act5C-GAL4_28	s+; Act5C-GAL4_28_4
s+; Act5C-GAL4	90	28	5	s+; Act5C-GAL4_28	s+; Act5C-GAL4_28_5
s+; Act5C-GAL4	92	28	6	s+; Act5C-GAL4_28	s+; Act5C-GAL4_28_6
s+; Act5C-GAL4	93	28	7	s+; Act5C-GAL4_28	s+; Act5C-GAL4_28_7
s+; Act5C-GAL4	89	28	8	s+; Act5C-GAL4_28	s+; Act5C-GAL4_28_8
s+; Act5C-GAL4	94	28	9	s+; Act5C-GAL4_28	s+; Act5C-GAL4_28_9
s+; Act5C-GAL4	94	28	10	s+; Act5C-GAL4_28	s+; Act5C-GAL4_28_10
s+; Act5C-GAL4	98	28	11	s+; Act5C-GAL4_28	s+; Act5C-GAL4_28_11
s+; Act5C-GAL4	85	28	12	s+; Act5C-GAL4_28	s+; Act5C-GAL4_28_12
s+; Act5C-GAL4	94	28	13	s+; Act5C-GAL4_28	s+; Act5C-GAL4_28_13
s+; Act5C-GAL4	95	28	14	s+; Act5C-GAL4_28	s+; Act5C-GAL4_28_14
s+; Act5C-GAL4	82	28	15	s+; Act5C-GAL4_28	s+; Act5C-GAL4_28_15
s+; Act5C-GAL4	97	28	16	s+; Act5C-GAL4_28	s+; Act5C-GAL4_28_16
s+; Act5C-GAL4	89	28	17	s+; Act5C-GAL4_28	s+; Act5C-GAL4_28_17
s+; Act5C-GAL4	96	28	18	s+; Act5C-GAL4_28	s+; Act5C-GAL4_28_18
s+; Act5C-GAL4	87	28	19	s+; Act5C-GAL4_28	s+; Act5C-GAL4_28_19
s+; Act5C-GAL4	91	28	20	s+; Act5C-GAL4_28	s+; Act5C-GAL4_28_20
s+; Act5C-GAL4	69	29	1	s+; Act5C-GAL4_29	s+; Act5C-GAL4_29_1
s+; Act5C-GAL4	75	29	2	s+; Act5C-GAL4_29	s+; Act5C-GAL4_29_2
s+; Act5C-GAL4	86	29	3	s+; Act5C-GAL4_29	s+; Act5C-GAL4_29_3
s+; Act5C-GAL4	86	29	4	s+; Act5C-GAL4_29	s+; Act5C-GAL4_29_4
s+; Act5C-GAL4	69	29	5	s+; Act5C-GAL4_29	s+; Act5C-GAL4_29_5
s+; Act5C-GAL4	72	29	6	s+; Act5C-GAL4_29	s+; Act5C-GAL4_29_6
s+; Act5C-GAL4	75	29	7	s+; Act5C-GAL4_29	s+; Act5C-GAL4_29_7
s+; Act5C-GAL4	72	29	8	s+; Act5C-GAL4_29	s+; Act5C-GAL4_29_8
s+; Act5C-GAL4	73	29	9	s+; Act5C-GAL4_29	s+; Act5C-GAL4_29_9
s+; Act5C-GAL4	72	29	10	s+; Act5C-GAL4_29	s+; Act5C-GAL4_29_10
s+; Act5C-GAL4	81	29	11	s+; Act5C-GAL4_29	s+; Act5C-GAL4_29_11
s+; Act5C-GAL4	84	29	12	s+; Act5C-GAL4_29	s+; Act5C-GAL4_29_12
s+; Act5C-GAL4	76	29	13	s+; Act5C-GAL4_29	s+; Act5C-GAL4_29_13
s+; Act5C-GAL4	72	29	14	s+; Act5C-GAL4_29	s+; Act5C-GAL4_29_14
s+; Act5C-GAL4	78	29	15	s+; Act5C-GAL4_29	s+; Act5C-GAL4_29_15
s+; Act5C-GAL4	75	29	16	s+; Act5C-GAL4_29	s+; Act5C-GAL4_29_16
s+; Act5C-GAL4	77	29	17	s+; Act5C-GAL4_29	s+; Act5C-GAL4_29_17
s+; Act5C-GAL4	83	29	18	s+; Act5C-GAL4_29	s+; Act5C-GAL4_29_18
s+; Act5C-GAL4	77	29	19	s+; Act5C-GAL4_29	s+; Act5C-GAL4_29_19
s+; Act5C-GAL4	74	29	20	s+; Act5C-GAL4_29	s+; Act5C-GAL4_29_20
s+; Act5C-GAL4	76	30	1	s+; Act5C-GAL4_30	s+; Act5C-GAL4_30_1
s+; Act5C-GAL4	82	30	2	s+; Act5C-GAL4_30	s+; Act5C-GAL4_30_2
s+; Act5C-GAL4	97	30	3	s+; Act5C-GAL4_30	s+; Act5C-GAL4_30_3
s+; Act5C-GAL4	87	30	4	s+; Act5C-GAL4_30	s+; Act5C-GAL4_30_4
s+; Act5C-GAL4	74	30	5	s+; Act5C-GAL4_30	s+; Act5C-GAL4_30_5
s+; Act5C-GAL4	89	30	6	s+; Act5C-GAL4_30	s+; Act5C-GAL4_30_6
s+; Act5C-GAL4	92	30	7	s+; Act5C-GAL4_30	s+; Act5C-GAL4_30_7
s+; Act5C-GAL4	80	30	8	s+; Act5C-GAL4_30	s+; Act5C-GAL4_30_8
s+; Act5C-GAL4	68	30	9	s+; Act5C-GAL4_30	s+; Act5C-GAL4_30_9
s+; Act5C-GAL4	100	30	10	s+; Act5C-GAL4_30	s+; Act5C-GAL4_30_10
s+; Act5C-GAL4	91	30	11	s+; Act5C-GAL4_30	s+; Act5C-GAL4_30_11
s+; Act5C-GAL4	73	30	12	s+; Act5C-GAL4_30	s+; Act5C-GAL4_30_12
s+; Act5C-GAL4	86	30	13	s+; Act5C-GAL4_30	s+; Act5C-GAL4_30_13
s+; Act5C-GAL4	74	30	14	s+; Act5C-GAL4_30	s+; Act5C-GAL4_30_14
s+; Act5C-GAL4	67	30	15	s+; Act5C-GAL4_30	s+; Act5C-GAL4_30_15
s+; Act5C-GAL4	90	30	16	s+; Act5C-GAL4_30	s+; Act5C-GAL4_30_16
s+; Act5C-GAL4	85	30	17	s+; Act5C-GAL4_30	s+; Act5C-GAL4_30_17
s+; Act5C-GAL4	84	30	18	s+; Act5C-GAL4_30	s+; Act5C-GAL4_30_18
s+; Act5C-GAL4	79	30	19	s+; Act5C-GAL4_30	s+; Act5C-GAL4_30_19
s+; Act5C-GAL4	72	30	20	s+; Act5C-GAL4_30	s+; Act5C-GAL4_30_20
s+; Act5C-GAL4	94	31	1	s+; Act5C-GAL4_31	s+; Act5C-GAL4_31_1
s+; Act5C-GAL4	92	31	2	s+; Act5C-GAL4_31	s+; Act5C-GAL4_31_2
s+; Act5C-GAL4	92	31	3	s+; Act5C-GAL4_31	s+; Act5C-GAL4_31_3
s+; Act5C-GAL4	90	31	4	s+; Act5C-GAL4_31	s+; Act5C-GAL4_31_4
s+; Act5C-GAL4	90	31	5	s+; Act5C-GAL4_31	s+; Act5C-GAL4_31_5
s+; Act5C-GAL4	87	31	6	s+; Act5C-GAL4_31	s+; Act5C-GAL4_31_6
s+; Act5C-GAL4	85	31	7	s+; Act5C-GAL4_31	s+; Act5C-GAL4_31_7
s+; Act5C-GAL4	86	31	8	s+; Act5C-GAL4_31	s+; Act5C-GAL4_31_8
s+; Act5C-GAL4	94	31	9	s+; Act5C-GAL4_31	s+; Act5C-GAL4_31_9
s+; Act5C-GAL4	90	31	10	s+; Act5C-GAL4_31	s+; Act5C-GAL4_31_10
s+; Act5C-GAL4	63	31	11	s+; Act5C-GAL4_31	s+; Act5C-GAL4_31_11
s+; Act5C-GAL4	94	31	12	s+; Act5C-GAL4_31	s+; Act5C-GAL4_31_12
s+; Act5C-GAL4	90	31	13	s+; Act5C-GAL4_31	s+; Act5C-GAL4_31_13
s+; Act5C-GAL4	90	31	14	s+; Act5C-GAL4_31	s+; Act5C-GAL4_31_14
s+; Act5C-GAL4	94	31	15	s+; Act5C-GAL4_31	s+; Act5C-GAL4_31_15
s+; Act5C-GAL4	92	31	16	s+; Act5C-GAL4_31	s+; Act5C-GAL4_31_16
s+; Act5C-GAL4	93	31	17	s+; Act5C-GAL4_31	s+; Act5C-GAL4_31_17
s+; Act5C-GAL4	94	31	18	s+; Act5C-GAL4_31	s+; Act5C-GAL4_31_18
s+; Act5C-GAL4	96	31	19	s+; Act5C-GAL4_31	s+; Act5C-GAL4_31_19
s+; Act5C-GAL4	96	31	20	s+; Act5C-GAL4_31	s+; Act5C-GAL4_31_20
s+; Act5C-GAL4	56	32	1	s+; Act5C-GAL4_32	s+; Act5C-GAL4_32_1
s+; Act5C-GAL4	69	32	2	s+; Act5C-GAL4_32	s+; Act5C-GAL4_32_2
s+; Act5C-GAL4	66	32	3	s+; Act5C-GAL4_32	s+; Act5C-GAL4_32_3
s+; Act5C-GAL4	65	32	4	s+; Act5C-GAL4_32	s+; Act5C-GAL4_32_4
s+; Act5C-GAL4	68	32	5	s+; Act5C-GAL4_32	s+; Act5C-GAL4_32_5
s+; Act5C-GAL4	66	32	6	s+; Act5C-GAL4_32	s+; Act5C-GAL4_32_6
s+; Act5C-GAL4	62	32	7	s+; Act5C-GAL4_32	s+; Act5C-GAL4_32_7
s+; Act5C-GAL4	52	32	8	s+; Act5C-GAL4_32	s+; Act5C-GAL4_32_8
s+; Act5C-GAL4	57	32	9	s+; Act5C-GAL4_32	s+; Act5C-GAL4_32_9
s+; Act5C-GAL4	56	32	10	s+; Act5C-GAL4_32	s+; Act5C-GAL4_32_10
s+; Act5C-GAL4	69	32	11	s+; Act5C-GAL4_32	s+; Act5C-GAL4_32_11
s+; Act5C-GAL4	58	32	12	s+; Act5C-GAL4_32	s+; Act5C-GAL4_32_12
s+; Act5C-GAL4	71	32	13	s+; Act5C-GAL4_32	s+; Act5C-GAL4_32_13
s+; Act5C-GAL4	58	32	14	s+; Act5C-GAL4_32	s+; Act5C-GAL4_32_14
s+; Act5C-GAL4	54	32	15	s+; Act5C-GAL4_32	s+; Act5C-GAL4_32_15
s+; Act5C-GAL4	53	32	16	s+; Act5C-GAL4_32	s+; Act5C-GAL4_32_16
s+; Act5C-GAL4	59	32	17	s+; Act5C-GAL4_32	s+; Act5C-GAL4_32_17
s+; Act5C-GAL4	60	32	18	s+; Act5C-GAL4_32	s+; Act5C-GAL4_32_18
s+; Act5C-GAL4	65	32	19	s+; Act5C-GAL4_32	s+; Act5C-GAL4_32_19
s+; Act5C-GAL4	44	32	20	s+; Act5C-GAL4_32	s+; Act5C-GAL4_32_20
s+; Act5C-GAL4	79	33	1	s+; Act5C-GAL4_33	s+; Act5C-GAL4_33_1
s+; Act5C-GAL4	71	33	2	s+; Act5C-GAL4_33	s+; Act5C-GAL4_33_2
s+; Act5C-GAL4	81	33	3	s+; Act5C-GAL4_33	s+; Act5C-GAL4_33_3
s+; Act5C-GAL4	69	33	4	s+; Act5C-GAL4_33	s+; Act5C-GAL4_33_4
s+; Act5C-GAL4	79	33	5	s+; Act5C-GAL4_33	s+; Act5C-GAL4_33_5
s+; Act5C-GAL4	81	33	6	s+; Act5C-GAL4_33	s+; Act5C-GAL4_33_6
s+; Act5C-GAL4	76	33	7	s+; Act5C-GAL4_33	s+; Act5C-GAL4_33_7
s+; Act5C-GAL4	77	33	8	s+; Act5C-GAL4_33	s+; Act5C-GAL4_33_8
s+; Act5C-GAL4	78	33	9	s+; Act5C-GAL4_33	s+; Act5C-GAL4_33_9
s+; Act5C-GAL4	70	33	10	s+; Act5C-GAL4_33	s+; Act5C-GAL4_33_10
s+; Act5C-GAL4	61	33	11	s+; Act5C-GAL4_33	s+; Act5C-GAL4_33_11
s+; Act5C-GAL4	67	33	12	s+; Act5C-GAL4_33	s+; Act5C-GAL4_33_12
s+; Act5C-GAL4	69	33	13	s+; Act5C-GAL4_33	s+; Act5C-GAL4_33_13
s+; Act5C-GAL4	83	33	14	s+; Act5C-GAL4_33	s+; Act5C-GAL4_33_14
s+; Act5C-GAL4	82	33	15	s+; Act5C-GAL4_33	s+; Act5C-GAL4_33_15
s+; Act5C-GAL4	94	33	16	s+; Act5C-GAL4_33	s+; Act5C-GAL4_33_16
s+; Act5C-GAL4	83	33	17	s+; Act5C-GAL4_33	s+; Act5C-GAL4_33_17
s+; Act5C-GAL4	96	33	18	s+; Act5C-GAL4_33	s+; Act5C-GAL4_33_18
s+; Act5C-GAL4	72	33	19	s+; Act5C-GAL4_33	s+; Act5C-GAL4_33_19
s+; Act5C-GAL4	76	33	20	s+; Act5C-GAL4_33	s+; Act5C-GAL4_33_20
s+; Act5C-GAL4	67	34	1	s+; Act5C-GAL4_34	s+; Act5C-GAL4_34_1
s+; Act5C-GAL4	61	34	2	s+; Act5C-GAL4_34	s+; Act5C-GAL4_34_2
s+; Act5C-GAL4	61	34	3	s+; Act5C-GAL4_34	s+; Act5C-GAL4_34_3
s+; Act5C-GAL4	75	34	4	s+; Act5C-GAL4_34	s+; Act5C-GAL4_34_4
s+; Act5C-GAL4	68	34	5	s+; Act5C-GAL4_34	s+; Act5C-GAL4_34_5
s+; Act5C-GAL4	57	34	6	s+; Act5C-GAL4_34	s+; Act5C-GAL4_34_6
s+; Act5C-GAL4	71	34	7	s+; Act5C-GAL4_34	s+; Act5C-GAL4_34_7
s+; Act5C-GAL4	69	34	8	s+; Act5C-GAL4_34	s+; Act5C-GAL4_34_8
s+; Act5C-GAL4	50	34	9	s+; Act5C-GAL4_34	s+; Act5C-GAL4_34_9
s+; Act5C-GAL4	63	34	10	s+; Act5C-GAL4_34	s+; Act5C-GAL4_34_10
s+; Act5C-GAL4	59	34	11	s+; Act5C-GAL4_34	s+; Act5C-GAL4_34_11
s+; Act5C-GAL4	68	34	12	s+; Act5C-GAL4_34	s+; Act5C-GAL4_34_12
s+; Act5C-GAL4	70	34	13	s+; Act5C-GAL4_34	s+; Act5C-GAL4_34_13
s+; Act5C-GAL4	68	34	14	s+; Act5C-GAL4_34	s+; Act5C-GAL4_34_14
s+; Act5C-GAL4	60	34	15	s+; Act5C-GAL4_34	s+; Act5C-GAL4_34_15
s+; Act5C-GAL4	64	34	16	s+; Act5C-GAL4_34	s+; Act5C-GAL4_34_16
s+; Act5C-GAL4	65	34	17	s+; Act5C-GAL4_34	s+; Act5C-GAL4_34_17
s+; Act5C-GAL4	69	34	18	s+; Act5C-GAL4_34	s+; Act5C-GAL4_34_18
s+; Act5C-GAL4	73	34	19	s+; Act5C-GAL4_34	s+; Act5C-GAL4_34_19
s+; Act5C-GAL4	83	34	20	s+; Act5C-GAL4_34	s+; Act5C-GAL4_34_20
s+; Act5C-GAL4	80	35	1	s+; Act5C-GAL4_35	s+; Act5C-GAL4_35_1
s+; Act5C-GAL4	85	35	2	s+; Act5C-GAL4_35	s+; Act5C-GAL4_35_2
s+; Act5C-GAL4	74	35	3	s+; Act5C-GAL4_35	s+; Act5C-GAL4_35_3
s+; Act5C-GAL4	88	35	4	s+; Act5C-GAL4_35	s+; Act5C-GAL4_35_4
s+; Act5C-GAL4	73	35	5	s+; Act5C-GAL4_35	s+; Act5C-GAL4_35_5
s+; Act5C-GAL4	73	35	6	s+; Act5C-GAL4_35	s+; Act5C-GAL4_35_6
s+; Act5C-GAL4	80	35	7	s+; Act5C-GAL4_35	s+; Act5C-GAL4_35_7
s+; Act5C-GAL4	71	35	8	s+; Act5C-GAL4_35	s+; Act5C-GAL4_35_8
s+; Act5C-GAL4	70	35	9	s+; Act5C-GAL4_35	s+; Act5C-GAL4_35_9
s+; Act5C-GAL4	76	35	10	s+; Act5C-GAL4_35	s+; Act5C-GAL4_35_10
s+; Act5C-GAL4	79	35	11	s+; Act5C-GAL4_35	s+; Act5C-GAL4_35_11
s+; Act5C-GAL4	73	35	12	s+; Act5C-GAL4_35	s+; Act5C-GAL4_35_12
s+; Act5C-GAL4	76	35	13	s+; Act5C-GAL4_35	s+; Act5C-GAL4_35_13
s+; Act5C-GAL4	78	35	14	s+; Act5C-GAL4_35	s+; Act5C-GAL4_35_14
s+; Act5C-GAL4	68	35	15	s+; Act5C-GAL4_35	s+; Act5C-GAL4_35_15
s+; Act5C-GAL4	78	35	16	s+; Act5C-GAL4_35	s+; Act5C-GAL4_35_16
s+; Act5C-GAL4	69	35	17	s+; Act5C-GAL4_35	s+; Act5C-GAL4_35_17
s+; Act5C-GAL4	62	35	18	s+; Act5C-GAL4_35	s+; Act5C-GAL4_35_18
s+; Act5C-GAL4	67	35	19	s+; Act5C-GAL4_35	s+; Act5C-GAL4_35_19
s+; Act5C-GAL4	70	35	20	s+; Act5C-GAL4_35	s+; Act5C-GAL4_35_20
s+; Act5C-GAL4	79	36	1	s+; Act5C-GAL4_36	s+; Act5C-GAL4_36_1
s+; Act5C-GAL4	73	36	2	s+; Act5C-GAL4_36	s+; Act5C-GAL4_36_2
s+; Act5C-GAL4	86	36	3	s+; Act5C-GAL4_36	s+; Act5C-GAL4_36_3
s+; Act5C-GAL4	78	36	4	s+; Act5C-GAL4_36	s+; Act5C-GAL4_36_4
s+; Act5C-GAL4	74	36	5	s+; Act5C-GAL4_36	s+; Act5C-GAL4_36_5
s+; Act5C-GAL4	84	36	6	s+; Act5C-GAL4_36	s+; Act5C-GAL4_36_6
s+; Act5C-GAL4	74	36	7	s+; Act5C-GAL4_36	s+; Act5C-GAL4_36_7
s+; Act5C-GAL4	74	36	8	s+; Act5C-GAL4_36	s+; Act5C-GAL4_36_8
s+; Act5C-GAL4	87	36	9	s+; Act5C-GAL4_36	s+; Act5C-GAL4_36_9
s+; Act5C-GAL4	81	36	10	s+; Act5C-GAL4_36	s+; Act5C-GAL4_36_10
s+; Act5C-GAL4	98	36	11	s+; Act5C-GAL4_36	s+; Act5C-GAL4_36_11
s+; Act5C-GAL4	73	36	12	s+; Act5C-GAL4_36	s+; Act5C-GAL4_36_12
s+; Act5C-GAL4	95	36	13	s+; Act5C-GAL4_36	s+; Act5C-GAL4_36_13
s+; Act5C-GAL4	85	36	14	s+; Act5C-GAL4_36	s+; Act5C-GAL4_36_14
s+; Act5C-GAL4	80	36	15	s+; Act5C-GAL4_36	s+; Act5C-GAL4_36_15
s+; Act5C-GAL4	78	36	16	s+; Act5C-GAL4_36	s+; Act5C-GAL4_36_16
s+; Act5C-GAL4	82	36	17	s+; Act5C-GAL4_36	s+; Act5C-GAL4_36_17
s+; Act5C-GAL4	81	36	18	s+; Act5C-GAL4_36	s+; Act5C-GAL4_36_18
s+; Act5C-GAL4	80	36	19	s+; Act5C-GAL4_36	s+; Act5C-GAL4_36_19
s+; Act5C-GAL4	86	36	20	s+; Act5C-GAL4_36	s+; Act5C-GAL4_36_20
s+; Act5C-GAL4	80	37	1	s+; Act5C-GAL4_37	s+; Act5C-GAL4_37_1
s+; Act5C-GAL4	79	37	2	s+; Act5C-GAL4_37	s+; Act5C-GAL4_37_2
s+; Act5C-GAL4	78	37	3	s+; Act5C-GAL4_37	s+; Act5C-GAL4_37_3
s+; Act5C-GAL4	78	37	4	s+; Act5C-GAL4_37	s+; Act5C-GAL4_37_4
s+; Act5C-GAL4	92	37	5	s+; Act5C-GAL4_37	s+; Act5C-GAL4_37_5
s+; Act5C-GAL4	87	37	6	s+; Act5C-GAL4_37	s+; Act5C-GAL4_37_6
s+; Act5C-GAL4	85	37	7	s+; Act5C-GAL4_37	s+; Act5C-GAL4_37_7
s+; Act5C-GAL4	92	37	8	s+; Act5C-GAL4_37	s+; Act5C-GAL4_37_8
s+; Act5C-GAL4	85	37	9	s+; Act5C-GAL4_37	s+; Act5C-GAL4_37_9
s+; Act5C-GAL4	92	37	10	s+; Act5C-GAL4_37	s+; Act5C-GAL4_37_10
s+; Act5C-GAL4	80	37	11	s+; Act5C-GAL4_37	s+; Act5C-GAL4_37_11
s+; Act5C-GAL4	77	37	12	s+; Act5C-GAL4_37	s+; Act5C-GAL4_37_12
s+; Act5C-GAL4	72	37	13	s+; Act5C-GAL4_37	s+; Act5C-GAL4_37_13
s+; Act5C-GAL4	94	37	14	s+; Act5C-GAL4_37	s+; Act5C-GAL4_37_14
s+; Act5C-GAL4	85	37	15	s+; Act5C-GAL4_37	s+; Act5C-GAL4_37_15
s+; Act5C-GAL4	81	37	16	s+; Act5C-GAL4_37	s+; Act5C-GAL4_37_16
s+; Act5C-GAL4	80	37	17	s+; Act5C-GAL4_37	s+; Act5C-GAL4_37_17
s+; Act5C-GAL4	88	37	18	s+; Act5C-GAL4_37	s+; Act5C-GAL4_37_18
s+; Act5C-GAL4	87	37	19	s+; Act5C-GAL4_37	s+; Act5C-GAL4_37_19
s+; Act5C-GAL4	93	37	20	s+; Act5C-GAL4_37	s+; Act5C-GAL4_37_20
s+; Act5C-GAL4	68	38	1	s+; Act5C-GAL4_38	s+; Act5C-GAL4_38_1
s+; Act5C-GAL4	67	38	2	s+; Act5C-GAL4_38	s+; Act5C-GAL4_38_2
s+; Act5C-GAL4	67	38	3	s+; Act5C-GAL4_38	s+; Act5C-GAL4_38_3
s+; Act5C-GAL4	68	38	4	s+; Act5C-GAL4_38	s+; Act5C-GAL4_38_4
s+; Act5C-GAL4	68	38	5	s+; Act5C-GAL4_38	s+; Act5C-GAL4_38_5
s+; Act5C-GAL4	70	38	6	s+; Act5C-GAL4_38	s+; Act5C-GAL4_38_6
s+; Act5C-GAL4	66	38	7	s+; Act5C-GAL4_38	s+; Act5C-GAL4_38_7
s+; Act5C-GAL4	64	38	8	s+; Act5C-GAL4_38	s+; Act5C-GAL4_38_8
s+; Act5C-GAL4	76	38	9	s+; Act5C-GAL4_38	s+; Act5C-GAL4_38_9
s+; Act5C-GAL4	79	38	10	s+; Act5C-GAL4_38	s+; Act5C-GAL4_38_10
s+; Act5C-GAL4	66	38	11	s+; Act5C-GAL4_38	s+; Act5C-GAL4_38_11
s+; Act5C-GAL4	77	38	12	s+; Act5C-GAL4_38	s+; Act5C-GAL4_38_12
s+; Act5C-GAL4	77	38	13	s+; Act5C-GAL4_38	s+; Act5C-GAL4_38_13
s+; Act5C-GAL4	75	38	14	s+; Act5C-GAL4_38	s+; Act5C-GAL4_38_14
s+; Act5C-GAL4	67	38	15	s+; Act5C-GAL4_38	s+; Act5C-GAL4_38_15
s+; Act5C-GAL4	71	38	16	s+; Act5C-GAL4_38	s+; Act5C-GAL4_38_16
s+; Act5C-GAL4	75	38	17	s+; Act5C-GAL4_38	s+; Act5C-GAL4_38_17
s+; Act5C-GAL4	74	38	18	s+; Act5C-GAL4_38	s+; Act5C-GAL4_38_18
s+; Act5C-GAL4	73	38	19	s+; Act5C-GAL4_38	s+; Act5C-GAL4_38_19
s+; Act5C-GAL4	70	38	20	s+; Act5C-GAL4_38	s+; Act5C-GAL4_38_20
s+; Act5C-GAL4	73	39	1	s+; Act5C-GAL4_39	s+; Act5C-GAL4_39_1
s+; Act5C-GAL4	71	39	2	s+; Act5C-GAL4_39	s+; Act5C-GAL4_39_2
s+; Act5C-GAL4	71	39	3	s+; Act5C-GAL4_39	s+; Act5C-GAL4_39_3
s+; Act5C-GAL4	69	39	4	s+; Act5C-GAL4_39	s+; Act5C-GAL4_39_4
s+; Act5C-GAL4	70	39	5	s+; Act5C-GAL4_39	s+; Act5C-GAL4_39_5
s+; Act5C-GAL4	88	39	6	s+; Act5C-GAL4_39	s+; Act5C-GAL4_39_6
s+; Act5C-GAL4	71	39	7	s+; Act5C-GAL4_39	s+; Act5C-GAL4_39_7
s+; Act5C-GAL4	76	39	8	s+; Act5C-GAL4_39	s+; Act5C-GAL4_39_8
s+; Act5C-GAL4	59	39	9	s+; Act5C-GAL4_39	s+; Act5C-GAL4_39_9
s+; Act5C-GAL4	67	39	10	s+; Act5C-GAL4_39	s+; Act5C-GAL4_39_10
s+; Act5C-GAL4	84	39	11	s+; Act5C-GAL4_39	s+; Act5C-GAL4_39_11
s+; Act5C-GAL4	62	39	12	s+; Act5C-GAL4_39	s+; Act5C-GAL4_39_12
s+; Act5C-GAL4	62	39	13	s+; Act5C-GAL4_39	s+; Act5C-GAL4_39_13
s+; Act5C-GAL4	63	39	14	s+; Act5C-GAL4_39	s+; Act5C-GAL4_39_14
s+; Act5C-GAL4	61	39	15	s+; Act5C-GAL4_39	s+; Act5C-GAL4_39_15
s+; Act5C-GAL4	51	39	16	s+; Act5C-GAL4_39	s+; Act5C-GAL4_39_16
s+; Act5C-GAL4	61	39	17	s+; Act5C-GAL4_39	s+; Act5C-GAL4_39_17
s+; Act5C-GAL4	73	39	18	s+; Act5C-GAL4_39	s+; Act5C-GAL4_39_18
s+; Act5C-GAL4	76	39	19	s+; Act5C-GAL4_39	s+; Act5C-GAL4_39_19
s+; Act5C-GAL4	66	39	20	s+; Act5C-GAL4_39	s+; Act5C-GAL4_39_20
s+; Act5C-GAL4	52	40	1	s+; Act5C-GAL4_40	s+; Act5C-GAL4_40_1
s+; Act5C-GAL4	90	40	2	s+; Act5C-GAL4_40	s+; Act5C-GAL4_40_2
s+; Act5C-GAL4	72	40	3	s+; Act5C-GAL4_40	s+; Act5C-GAL4_40_3
s+; Act5C-GAL4	61	40	4	s+; Act5C-GAL4_40	s+; Act5C-GAL4_40_4
s+; Act5C-GAL4	86	40	5	s+; Act5C-GAL4_40	s+; Act5C-GAL4_40_5
s+; Act5C-GAL4	78	40	6	s+; Act5C-GAL4_40	s+; Act5C-GAL4_40_6
s+; Act5C-GAL4	79	40	7	s+; Act5C-GAL4_40	s+; Act5C-GAL4_40_7
s+; Act5C-GAL4	58	40	8	s+; Act5C-GAL4_40	s+; Act5C-GAL4_40_8
s+; Act5C-GAL4	86	40	9	s+; Act5C-GAL4_40	s+; Act5C-GAL4_40_9
s+; Act5C-GAL4	81	40	10	s+; Act5C-GAL4_40	s+; Act5C-GAL4_40_10
s+; Act5C-GAL4	83	40	11	s+; Act5C-GAL4_40	s+; Act5C-GAL4_40_11
s+; Act5C-GAL4	75	40	12	s+; Act5C-GAL4_40	s+; Act5C-GAL4_40_12
s+; Act5C-GAL4	82	40	13	s+; Act5C-GAL4_40	s+; Act5C-GAL4_40_13
s+; Act5C-GAL4	78	40	14	s+; Act5C-GAL4_40	s+; Act5C-GAL4_40_14
s+; Act5C-GAL4	78	40	15	s+; Act5C-GAL4_40	s+; Act5C-GAL4_40_15
s+; Act5C-GAL4	84	40	16	s+; Act5C-GAL4_40	s+; Act5C-GAL4_40_16
s+; Act5C-GAL4	82	40	17	s+; Act5C-GAL4_40	s+; Act5C-GAL4_40_17
s+; Act5C-GAL4	59	40	18	s+; Act5C-GAL4_40	s+; Act5C-GAL4_40_18
s+; Act5C-GAL4	89	40	19	s+; Act5C-GAL4_40	s+; Act5C-GAL4_40_19
s+; Act5C-GAL4	78	40	20	s+; Act5C-GAL4_40	s+; Act5C-GAL4_40_20
s+; Act5C-GAL4	84	41	1	s+; Act5C-GAL4_41	s+; Act5C-GAL4_41_1
s+; Act5C-GAL4	77	41	2	s+; Act5C-GAL4_41	s+; Act5C-GAL4_41_2
s+; Act5C-GAL4	77	41	3	s+; Act5C-GAL4_41	s+; Act5C-GAL4_41_3
s+; Act5C-GAL4	75	41	4	s+; Act5C-GAL4_41	s+; Act5C-GAL4_41_4
s+; Act5C-GAL4	74	41	5	s+; Act5C-GAL4_41	s+; Act5C-GAL4_41_5
s+; Act5C-GAL4	74	41	6	s+; Act5C-GAL4_41	s+; Act5C-GAL4_41_6
s+; Act5C-GAL4	83	41	7	s+; Act5C-GAL4_41	s+; Act5C-GAL4_41_7
s+; Act5C-GAL4	73	41	8	s+; Act5C-GAL4_41	s+; Act5C-GAL4_41_8
s+; Act5C-GAL4	76	41	9	s+; Act5C-GAL4_41	s+; Act5C-GAL4_41_9
s+; Act5C-GAL4	80	41	10	s+; Act5C-GAL4_41	s+; Act5C-GAL4_41_10
s+; Act5C-GAL4	88	41	11	s+; Act5C-GAL4_41	s+; Act5C-GAL4_41_11
s+; Act5C-GAL4	76	41	12	s+; Act5C-GAL4_41	s+; Act5C-GAL4_41_12
s+; Act5C-GAL4	74	41	13	s+; Act5C-GAL4_41	s+; Act5C-GAL4_41_13
s+; Act5C-GAL4	74	41	14	s+; Act5C-GAL4_41	s+; Act5C-GAL4_41_14
s+; Act5C-GAL4	82	41	15	s+; Act5C-GAL4_41	s+; Act5C-GAL4_41_15
s+; Act5C-GAL4	78	41	16	s+; Act5C-GAL4_41	s+; Act5C-GAL4_41_16
s+; Act5C-GAL4	82	41	17	s+; Act5C-GAL4_41	s+; Act5C-GAL4_41_17
s+; Act5C-GAL4	84	41	18	s+; Act5C-GAL4_41	s+; Act5C-GAL4_41_18
s+; Act5C-GAL4	74	41	19	s+; Act5C-GAL4_41	s+; Act5C-GAL4_41_19
s+; Act5C-GAL4	87	41	20	s+; Act5C-GAL4_41	s+; Act5C-GAL4_41_20
s+; Act5C-GAL4	62	42	1	s+; Act5C-GAL4_42	s+; Act5C-GAL4_42_1
s+; Act5C-GAL4	57	42	2	s+; Act5C-GAL4_42	s+; Act5C-GAL4_42_2
s+; Act5C-GAL4	68	42	3	s+; Act5C-GAL4_42	s+; Act5C-GAL4_42_3
s+; Act5C-GAL4	61	42	4	s+; Act5C-GAL4_42	s+; Act5C-GAL4_42_4
s+; Act5C-GAL4	68	42	5	s+; Act5C-GAL4_42	s+; Act5C-GAL4_42_5
s+; Act5C-GAL4	56	42	6	s+; Act5C-GAL4_42	s+; Act5C-GAL4_42_6
s+; Act5C-GAL4	60	42	7	s+; Act5C-GAL4_42	s+; Act5C-GAL4_42_7
s+; Act5C-GAL4	57	42	8	s+; Act5C-GAL4_42	s+; Act5C-GAL4_42_8
s+; Act5C-GAL4	50	42	9	s+; Act5C-GAL4_42	s+; Act5C-GAL4_42_9
s+; Act5C-GAL4	69	42	10	s+; Act5C-GAL4_42	s+; Act5C-GAL4_42_10
s+; Act5C-GAL4	64	42	11	s+; Act5C-GAL4_42	s+; Act5C-GAL4_42_11
s+; Act5C-GAL4	54	42	12	s+; Act5C-GAL4_42	s+; Act5C-GAL4_42_12
s+; Act5C-GAL4	60	42	13	s+; Act5C-GAL4_42	s+; Act5C-GAL4_42_13
s+; Act5C-GAL4	58	42	14	s+; Act5C-GAL4_42	s+; Act5C-GAL4_42_14
s+; Act5C-GAL4	58	42	15	s+; Act5C-GAL4_42	s+; Act5C-GAL4_42_15
s+; Act5C-GAL4	51	42	16	s+; Act5C-GAL4_42	s+; Act5C-GAL4_42_16
s+; Act5C-GAL4	57	42	17	s+; Act5C-GAL4_42	s+; Act5C-GAL4_42_17
s+; Act5C-GAL4	51	42	18	s+; Act5C-GAL4_42	s+; Act5C-GAL4_42_18
s+; Act5C-GAL4	62	42	19	s+; Act5C-GAL4_42	s+; Act5C-GAL4_42_19
s+; Act5C-GAL4	68	42	20	s+; Act5C-GAL4_42	s+; Act5C-GAL4_42_20
s+; Act5C-GAL4	84	43	1	s+; Act5C-GAL4_43	s+; Act5C-GAL4_43_1
s+; Act5C-GAL4	82	43	2	s+; Act5C-GAL4_43	s+; Act5C-GAL4_43_2
s+; Act5C-GAL4	80	43	3	s+; Act5C-GAL4_43	s+; Act5C-GAL4_43_3
s+; Act5C-GAL4	76	43	4	s+; Act5C-GAL4_43	s+; Act5C-GAL4_43_4
s+; Act5C-GAL4	78	43	5	s+; Act5C-GAL4_43	s+; Act5C-GAL4_43_5
s+; Act5C-GAL4	81	43	6	s+; Act5C-GAL4_43	s+; Act5C-GAL4_43_6
s+; Act5C-GAL4	82	43	7	s+; Act5C-GAL4_43	s+; Act5C-GAL4_43_7
s+; Act5C-GAL4	79	43	8	s+; Act5C-GAL4_43	s+; Act5C-GAL4_43_8
s+; Act5C-GAL4	87	43	9	s+; Act5C-GAL4_43	s+; Act5C-GAL4_43_9
s+; Act5C-GAL4	86	43	10	s+; Act5C-GAL4_43	s+; Act5C-GAL4_43_10
s+; Act5C-GAL4	90	43	11	s+; Act5C-GAL4_43	s+; Act5C-GAL4_43_11
s+; Act5C-GAL4	89	43	12	s+; Act5C-GAL4_43	s+; Act5C-GAL4_43_12
s+; Act5C-GAL4	72	43	13	s+; Act5C-GAL4_43	s+; Act5C-GAL4_43_13
s+; Act5C-GAL4	73	43	14	s+; Act5C-GAL4_43	s+; Act5C-GAL4_43_14
s+; Act5C-GAL4	85	43	15	s+; Act5C-GAL4_43	s+; Act5C-GAL4_43_15
s+; Act5C-GAL4	74	43	16	s+; Act5C-GAL4_43	s+; Act5C-GAL4_43_16
s+; Act5C-GAL4	78	43	17	s+; Act5C-GAL4_43	s+; Act5C-GAL4_43_17
s+; Act5C-GAL4	74	43	18	s+; Act5C-GAL4_43	s+; Act5C-GAL4_43_18
s+; Act5C-GAL4	73	43	19	s+; Act5C-GAL4_43	s+; Act5C-GAL4_43_19
s+; Act5C-GAL4	80	43	20	s+; Act5C-GAL4_43	s+; Act5C-GAL4_43_20
s+; Act5C-GAL4	99	44	1	s+; Act5C-GAL4_44	s+; Act5C-GAL4_44_1
s+; Act5C-GAL4	91	44	2	s+; Act5C-GAL4_44	s+; Act5C-GAL4_44_2
s+; Act5C-GAL4	95	44	3	s+; Act5C-GAL4_44	s+; Act5C-GAL4_44_3
s+; Act5C-GAL4	84	44	4	s+; Act5C-GAL4_44	s+; Act5C-GAL4_44_4
s+; Act5C-GAL4	88	44	5	s+; Act5C-GAL4_44	s+; Act5C-GAL4_44_5
s+; Act5C-GAL4	93	44	6	s+; Act5C-GAL4_44	s+; Act5C-GAL4_44_6
s+; Act5C-GAL4	91	44	7	s+; Act5C-GAL4_44	s+; Act5C-GAL4_44_7
s+; Act5C-GAL4	85	44	8	s+; Act5C-GAL4_44	s+; Act5C-GAL4_44_8
s+; Act5C-GAL4	87	44	9	s+; Act5C-GAL4_44	s+; Act5C-GAL4_44_9
s+; Act5C-GAL4	85	44	10	s+; Act5C-GAL4_44	s+; Act5C-GAL4_44_10
s+; Act5C-GAL4	81	44	11	s+; Act5C-GAL4_44	s+; Act5C-GAL4_44_11
s+; Act5C-GAL4	81	44	12	s+; Act5C-GAL4_44	s+; Act5C-GAL4_44_12
s+; Act5C-GAL4	95	44	13	s+; Act5C-GAL4_44	s+; Act5C-GAL4_44_13
s+; Act5C-GAL4	83	44	14	s+; Act5C-GAL4_44	s+; Act5C-GAL4_44_14
s+; Act5C-GAL4	86	44	15	s+; Act5C-GAL4_44	s+; Act5C-GAL4_44_15
s+; Act5C-GAL4	87	44	16	s+; Act5C-GAL4_44	s+; Act5C-GAL4_44_16
s+; Act5C-GAL4	87	44	17	s+; Act5C-GAL4_44	s+; Act5C-GAL4_44_17
s+; Act5C-GAL4	77	44	18	s+; Act5C-GAL4_44	s+; Act5C-GAL4_44_18
s+; Act5C-GAL4	81	44	19	s+; Act5C-GAL4_44	s+; Act5C-GAL4_44_19
s+; Act5C-GAL4	78	44	20	s+; Act5C-GAL4_44	s+; Act5C-GAL4_44_20
s+; Act5C-GAL4	53	45	1	s+; Act5C-GAL4_45	s+; Act5C-GAL4_45_1
s+; Act5C-GAL4	56	45	2	s+; Act5C-GAL4_45	s+; Act5C-GAL4_45_2
s+; Act5C-GAL4	75	45	3	s+; Act5C-GAL4_45	s+; Act5C-GAL4_45_3
s+; Act5C-GAL4	64	45	4	s+; Act5C-GAL4_45	s+; Act5C-GAL4_45_4
s+; Act5C-GAL4	66	45	5	s+; Act5C-GAL4_45	s+; Act5C-GAL4_45_5
s+; Act5C-GAL4	67	45	6	s+; Act5C-GAL4_45	s+; Act5C-GAL4_45_6
s+; Act5C-GAL4	67	45	7	s+; Act5C-GAL4_45	s+; Act5C-GAL4_45_7
s+; Act5C-GAL4	67	45	8	s+; Act5C-GAL4_45	s+; Act5C-GAL4_45_8
s+; Act5C-GAL4	66	45	9	s+; Act5C-GAL4_45	s+; Act5C-GAL4_45_9
s+; Act5C-GAL4	66	45	10	s+; Act5C-GAL4_45	s+; Act5C-GAL4_45_10
s+; Act5C-GAL4	73	45	11	s+; Act5C-GAL4_45	s+; Act5C-GAL4_45_11
s+; Act5C-GAL4	63	45	12	s+; Act5C-GAL4_45	s+; Act5C-GAL4_45_12
s+; Act5C-GAL4	63	45	13	s+; Act5C-GAL4_45	s+; Act5C-GAL4_45_13
s+; Act5C-GAL4	64	45	14	s+; Act5C-GAL4_45	s+; Act5C-GAL4_45_14
s+; Act5C-GAL4	71	45	15	s+; Act5C-GAL4_45	s+; Act5C-GAL4_45_15
s+; Act5C-GAL4	75	45	16	s+; Act5C-GAL4_45	s+; Act5C-GAL4_45_16
s+; Act5C-GAL4	72	45	17	s+; Act5C-GAL4_45	s+; Act5C-GAL4_45_17
s+; Act5C-GAL4	53	45	18	s+; Act5C-GAL4_45	s+; Act5C-GAL4_45_18
s+; Act5C-GAL4	75	45	19	s+; Act5C-GAL4_45	s+; Act5C-GAL4_45_19
s+; Act5C-GAL4	68	45	20	s+; Act5C-GAL4_45	s+; Act5C-GAL4_45_20
s+; Act5C-GAL4	87	46	1	s+; Act5C-GAL4_46	s+; Act5C-GAL4_46_1
s+; Act5C-GAL4	74	46	2	s+; Act5C-GAL4_46	s+; Act5C-GAL4_46_2
s+; Act5C-GAL4	84	46	3	s+; Act5C-GAL4_46	s+; Act5C-GAL4_46_3
s+; Act5C-GAL4	84	46	4	s+; Act5C-GAL4_46	s+; Act5C-GAL4_46_4
s+; Act5C-GAL4	81	46	5	s+; Act5C-GAL4_46	s+; Act5C-GAL4_46_5
s+; Act5C-GAL4	87	46	6	s+; Act5C-GAL4_46	s+; Act5C-GAL4_46_6
s+; Act5C-GAL4	81	46	7	s+; Act5C-GAL4_46	s+; Act5C-GAL4_46_7
s+; Act5C-GAL4	81	46	8	s+; Act5C-GAL4_46	s+; Act5C-GAL4_46_8
s+; Act5C-GAL4	60	46	9	s+; Act5C-GAL4_46	s+; Act5C-GAL4_46_9
s+; Act5C-GAL4	79	46	10	s+; Act5C-GAL4_46	s+; Act5C-GAL4_46_10
s+; Act5C-GAL4	77	46	11	s+; Act5C-GAL4_46	s+; Act5C-GAL4_46_11
s+; Act5C-GAL4	73	46	12	s+; Act5C-GAL4_46	s+; Act5C-GAL4_46_12
s+; Act5C-GAL4	77	46	13	s+; Act5C-GAL4_46	s+; Act5C-GAL4_46_13
s+; Act5C-GAL4	75	46	14	s+; Act5C-GAL4_46	s+; Act5C-GAL4_46_14
s+; Act5C-GAL4	90	46	15	s+; Act5C-GAL4_46	s+; Act5C-GAL4_46_15
s+; Act5C-GAL4	90	46	16	s+; Act5C-GAL4_46	s+; Act5C-GAL4_46_16
s+; Act5C-GAL4	75	46	17	s+; Act5C-GAL4_46	s+; Act5C-GAL4_46_17
s+; Act5C-GAL4	98	46	18	s+; Act5C-GAL4_46	s+; Act5C-GAL4_46_18
s+; Act5C-GAL4	88	46	19	s+; Act5C-GAL4_46	s+; Act5C-GAL4_46_19
s+; Act5C-GAL4	91	46	20	s+; Act5C-GAL4_46	s+; Act5C-GAL4_46_20
s+; Act5C-GAL4	72	47	1	s+; Act5C-GAL4_47	s+; Act5C-GAL4_47_1
s+; Act5C-GAL4	99	47	2	s+; Act5C-GAL4_47	s+; Act5C-GAL4_47_2
s+; Act5C-GAL4	87	47	3	s+; Act5C-GAL4_47	s+; Act5C-GAL4_47_3
s+; Act5C-GAL4	85	47	4	s+; Act5C-GAL4_47	s+; Act5C-GAL4_47_4
s+; Act5C-GAL4	86	47	5	s+; Act5C-GAL4_47	s+; Act5C-GAL4_47_5
s+; Act5C-GAL4	79	47	6	s+; Act5C-GAL4_47	s+; Act5C-GAL4_47_6
s+; Act5C-GAL4	81	47	7	s+; Act5C-GAL4_47	s+; Act5C-GAL4_47_7
s+; Act5C-GAL4	85	47	8	s+; Act5C-GAL4_47	s+; Act5C-GAL4_47_8
s+; Act5C-GAL4	96	47	9	s+; Act5C-GAL4_47	s+; Act5C-GAL4_47_9
s+; Act5C-GAL4	82	47	10	s+; Act5C-GAL4_47	s+; Act5C-GAL4_47_10
s+; Act5C-GAL4	80	47	11	s+; Act5C-GAL4_47	s+; Act5C-GAL4_47_11
s+; Act5C-GAL4	105	47	12	s+; Act5C-GAL4_47	s+; Act5C-GAL4_47_12
s+; Act5C-GAL4	90	47	13	s+; Act5C-GAL4_47	s+; Act5C-GAL4_47_13
s+; Act5C-GAL4	77	47	14	s+; Act5C-GAL4_47	s+; Act5C-GAL4_47_14
s+; Act5C-GAL4	89	47	15	s+; Act5C-GAL4_47	s+; Act5C-GAL4_47_15
s+; Act5C-GAL4	97	47	16	s+; Act5C-GAL4_47	s+; Act5C-GAL4_47_16
s+; Act5C-GAL4	93	47	17	s+; Act5C-GAL4_47	s+; Act5C-GAL4_47_17
s+; Act5C-GAL4	83	47	18	s+; Act5C-GAL4_47	s+; Act5C-GAL4_47_18
s+; Act5C-GAL4	86	47	19	s+; Act5C-GAL4_47	s+; Act5C-GAL4_47_19
s+; Act5C-GAL4	97	47	20	s+; Act5C-GAL4_47	s+; Act5C-GAL4_47_20
s+; Act5C-GAL4	77	48	1	s+; Act5C-GAL4_48	s+; Act5C-GAL4_48_1
s+; Act5C-GAL4	65	48	2	s+; Act5C-GAL4_48	s+; Act5C-GAL4_48_2
s+; Act5C-GAL4	65	48	3	s+; Act5C-GAL4_48	s+; Act5C-GAL4_48_3
s+; Act5C-GAL4	68	48	4	s+; Act5C-GAL4_48	s+; Act5C-GAL4_48_4
s+; Act5C-GAL4	70	48	5	s+; Act5C-GAL4_48	s+; Act5C-GAL4_48_5
s+; Act5C-GAL4	68	48	6	s+; Act5C-GAL4_48	s+; Act5C-GAL4_48_6
s+; Act5C-GAL4	80	48	7	s+; Act5C-GAL4_48	s+; Act5C-GAL4_48_7
s+; Act5C-GAL4	80	48	8	s+; Act5C-GAL4_48	s+; Act5C-GAL4_48_8
s+; Act5C-GAL4	64	48	9	s+; Act5C-GAL4_48	s+; Act5C-GAL4_48_9
s+; Act5C-GAL4	71	48	10	s+; Act5C-GAL4_48	s+; Act5C-GAL4_48_10
s+; Act5C-GAL4	67	48	11	s+; Act5C-GAL4_48	s+; Act5C-GAL4_48_11
s+; Act5C-GAL4	71	48	12	s+; Act5C-GAL4_48	s+; Act5C-GAL4_48_12
s+; Act5C-GAL4	75	48	13	s+; Act5C-GAL4_48	s+; Act5C-GAL4_48_13
s+; Act5C-GAL4	67	48	14	s+; Act5C-GAL4_48	s+; Act5C-GAL4_48_14
s+; Act5C-GAL4	62	48	15	s+; Act5C-GAL4_48	s+; Act5C-GAL4_48_15
s+; Act5C-GAL4	72	48	16	s+; Act5C-GAL4_48	s+; Act5C-GAL4_48_16
s+; Act5C-GAL4	63	48	17	s+; Act5C-GAL4_48	s+; Act5C-GAL4_48_17
s+; Act5C-GAL4	60	48	18	s+; Act5C-GAL4_48	s+; Act5C-GAL4_48_18
s+; Act5C-GAL4	58	48	19	s+; Act5C-GAL4_48	s+; Act5C-GAL4_48_19
s+; Act5C-GAL4	66	48	20	s+; Act5C-GAL4_48	s+; Act5C-GAL4_48_20
s+; Act5C-GAL4	61	49	1	s+; Act5C-GAL4_49	s+; Act5C-GAL4_49_1
s+; Act5C-GAL4	61	49	2	s+; Act5C-GAL4_49	s+; Act5C-GAL4_49_2
s+; Act5C-GAL4	77	49	3	s+; Act5C-GAL4_49	s+; Act5C-GAL4_49_3
s+; Act5C-GAL4	61	49	4	s+; Act5C-GAL4_49	s+; Act5C-GAL4_49_4
s+; Act5C-GAL4	65	49	5	s+; Act5C-GAL4_49	s+; Act5C-GAL4_49_5
s+; Act5C-GAL4	61	49	6	s+; Act5C-GAL4_49	s+; Act5C-GAL4_49_6
s+; Act5C-GAL4	53	49	7	s+; Act5C-GAL4_49	s+; Act5C-GAL4_49_7
s+; Act5C-GAL4	63	49	8	s+; Act5C-GAL4_49	s+; Act5C-GAL4_49_8
s+; Act5C-GAL4	61	49	9	s+; Act5C-GAL4_49	s+; Act5C-GAL4_49_9
s+; Act5C-GAL4	57	49	10	s+; Act5C-GAL4_49	s+; Act5C-GAL4_49_10
s+; Act5C-GAL4	73	49	11	s+; Act5C-GAL4_49	s+; Act5C-GAL4_49_11
s+; Act5C-GAL4	75	49	12	s+; Act5C-GAL4_49	s+; Act5C-GAL4_49_12
s+; Act5C-GAL4	79	49	13	s+; Act5C-GAL4_49	s+; Act5C-GAL4_49_13
s+; Act5C-GAL4	75	49	14	s+; Act5C-GAL4_49	s+; Act5C-GAL4_49_14
s+; Act5C-GAL4	60	49	15	s+; Act5C-GAL4_49	s+; Act5C-GAL4_49_15
s+; Act5C-GAL4	52	49	16	s+; Act5C-GAL4_49	s+; Act5C-GAL4_49_16
s+; Act5C-GAL4	62	49	17	s+; Act5C-GAL4_49	s+; Act5C-GAL4_49_17
s+; Act5C-GAL4	53	49	18	s+; Act5C-GAL4_49	s+; Act5C-GAL4_49_18
s+; Act5C-GAL4	61	49	19	s+; Act5C-GAL4_49	s+; Act5C-GAL4_49_19
s+; Act5C-GAL4	70	49	20	s+; Act5C-GAL4_49	s+; Act5C-GAL4_49_20
s+; Act5C-GAL4	104	50	1	s+; Act5C-GAL4_50	s+; Act5C-GAL4_50_1
s+; Act5C-GAL4	91	50	2	s+; Act5C-GAL4_50	s+; Act5C-GAL4_50_2
s+; Act5C-GAL4	87	50	3	s+; Act5C-GAL4_50	s+; Act5C-GAL4_50_3
s+; Act5C-GAL4	68	50	4	s+; Act5C-GAL4_50	s+; Act5C-GAL4_50_4
s+; Act5C-GAL4	67	50	5	s+; Act5C-GAL4_50	s+; Act5C-GAL4_50_5
s+; Act5C-GAL4	84	50	6	s+; Act5C-GAL4_50	s+; Act5C-GAL4_50_6
s+; Act5C-GAL4	84	50	7	s+; Act5C-GAL4_50	s+; Act5C-GAL4_50_7
s+; Act5C-GAL4	86	50	8	s+; Act5C-GAL4_50	s+; Act5C-GAL4_50_8
s+; Act5C-GAL4	94	50	9	s+; Act5C-GAL4_50	s+; Act5C-GAL4_50_9
s+; Act5C-GAL4	85	50	10	s+; Act5C-GAL4_50	s+; Act5C-GAL4_50_10
s+; Act5C-GAL4	67	50	11	s+; Act5C-GAL4_50	s+; Act5C-GAL4_50_11
s+; Act5C-GAL4	99	50	12	s+; Act5C-GAL4_50	s+; Act5C-GAL4_50_12
s+; Act5C-GAL4	84	50	13	s+; Act5C-GAL4_50	s+; Act5C-GAL4_50_13
s+; Act5C-GAL4	97	50	14	s+; Act5C-GAL4_50	s+; Act5C-GAL4_50_14
s+; Act5C-GAL4	93	50	15	s+; Act5C-GAL4_50	s+; Act5C-GAL4_50_15
s+; Act5C-GAL4	95	50	16	s+; Act5C-GAL4_50	s+; Act5C-GAL4_50_16
s+; Act5C-GAL4	104	50	17	s+; Act5C-GAL4_50	s+; Act5C-GAL4_50_17
s+; Act5C-GAL4	78	50	18	s+; Act5C-GAL4_50	s+; Act5C-GAL4_50_18
s+; Act5C-GAL4	98	50	19	s+; Act5C-GAL4_50	s+; Act5C-GAL4_50_19
s+; Act5C-GAL4	84	50	20	s+; Act5C-GAL4_50	s+; Act5C-GAL4_50_20
s+; Act5C-GAL4	61	51	1	s+; Act5C-GAL4_51	s+; Act5C-GAL4_51_1
s+; Act5C-GAL4	64	51	2	s+; Act5C-GAL4_51	s+; Act5C-GAL4_51_2
s+; Act5C-GAL4	68	51	3	s+; Act5C-GAL4_51	s+; Act5C-GAL4_51_3
s+; Act5C-GAL4	65	51	4	s+; Act5C-GAL4_51	s+; Act5C-GAL4_51_4
s+; Act5C-GAL4	62	51	5	s+; Act5C-GAL4_51	s+; Act5C-GAL4_51_5
s+; Act5C-GAL4	73	51	6	s+; Act5C-GAL4_51	s+; Act5C-GAL4_51_6
s+; Act5C-GAL4	59	51	7	s+; Act5C-GAL4_51	s+; Act5C-GAL4_51_7
s+; Act5C-GAL4	67	51	8	s+; Act5C-GAL4_51	s+; Act5C-GAL4_51_8
s+; Act5C-GAL4	64	51	9	s+; Act5C-GAL4_51	s+; Act5C-GAL4_51_9
s+; Act5C-GAL4	53	51	10	s+; Act5C-GAL4_51	s+; Act5C-GAL4_51_10
s+; Act5C-GAL4	67	51	11	s+; Act5C-GAL4_51	s+; Act5C-GAL4_51_11
s+; Act5C-GAL4	58	51	12	s+; Act5C-GAL4_51	s+; Act5C-GAL4_51_12
s+; Act5C-GAL4	58	51	13	s+; Act5C-GAL4_51	s+; Act5C-GAL4_51_13
s+; Act5C-GAL4	55	51	14	s+; Act5C-GAL4_51	s+; Act5C-GAL4_51_14
s+; Act5C-GAL4	70	51	15	s+; Act5C-GAL4_51	s+; Act5C-GAL4_51_15
s+; Act5C-GAL4	60	51	16	s+; Act5C-GAL4_51	s+; Act5C-GAL4_51_16
s+; Act5C-GAL4	65	51	17	s+; Act5C-GAL4_51	s+; Act5C-GAL4_51_17
s+; Act5C-GAL4	62	51	18	s+; Act5C-GAL4_51	s+; Act5C-GAL4_51_18
s+; Act5C-GAL4	57	51	19	s+; Act5C-GAL4_51	s+; Act5C-GAL4_51_19
s+; Act5C-GAL4	73	51	20	s+; Act5C-GAL4_51	s+; Act5C-GAL4_51_20
s+; Act5C-GAL4	90	52	1	s+; Act5C-GAL4_52	s+; Act5C-GAL4_52_1
s+; Act5C-GAL4	79	52	2	s+; Act5C-GAL4_52	s+; Act5C-GAL4_52_2
s+; Act5C-GAL4	83	52	3	s+; Act5C-GAL4_52	s+; Act5C-GAL4_52_3
s+; Act5C-GAL4	90	52	4	s+; Act5C-GAL4_52	s+; Act5C-GAL4_52_4
s+; Act5C-GAL4	67	52	5	s+; Act5C-GAL4_52	s+; Act5C-GAL4_52_5
s+; Act5C-GAL4	64	52	6	s+; Act5C-GAL4_52	s+; Act5C-GAL4_52_6
s+; Act5C-GAL4	76	52	7	s+; Act5C-GAL4_52	s+; Act5C-GAL4_52_7
s+; Act5C-GAL4	80	52	8	s+; Act5C-GAL4_52	s+; Act5C-GAL4_52_8
s+; Act5C-GAL4	83	52	9	s+; Act5C-GAL4_52	s+; Act5C-GAL4_52_9
s+; Act5C-GAL4	84	52	10	s+; Act5C-GAL4_52	s+; Act5C-GAL4_52_10
s+; Act5C-GAL4	85	52	11	s+; Act5C-GAL4_52	s+; Act5C-GAL4_52_11
s+; Act5C-GAL4	88	52	12	s+; Act5C-GAL4_52	s+; Act5C-GAL4_52_12
s+; Act5C-GAL4	88	52	13	s+; Act5C-GAL4_52	s+; Act5C-GAL4_52_13
s+; Act5C-GAL4	79	52	14	s+; Act5C-GAL4_52	s+; Act5C-GAL4_52_14
s+; Act5C-GAL4	83	52	15	s+; Act5C-GAL4_52	s+; Act5C-GAL4_52_15
s+; Act5C-GAL4	68	52	16	s+; Act5C-GAL4_52	s+; Act5C-GAL4_52_16
s+; Act5C-GAL4	93	52	17	s+; Act5C-GAL4_52	s+; Act5C-GAL4_52_17
s+; Act5C-GAL4	79	52	18	s+; Act5C-GAL4_52	s+; Act5C-GAL4_52_18
s+; Act5C-GAL4	60	52	19	s+; Act5C-GAL4_52	s+; Act5C-GAL4_52_19
s+; Act5C-GAL4	77	52	20	s+; Act5C-GAL4_52	s+; Act5C-GAL4_52_20
s+; Act5C-GAL4	78	53	1	s+; Act5C-GAL4_53	s+; Act5C-GAL4_53_1
s+; Act5C-GAL4	68	53	2	s+; Act5C-GAL4_53	s+; Act5C-GAL4_53_2
s+; Act5C-GAL4	77	53	3	s+; Act5C-GAL4_53	s+; Act5C-GAL4_53_3
s+; Act5C-GAL4	78	53	4	s+; Act5C-GAL4_53	s+; Act5C-GAL4_53_4
s+; Act5C-GAL4	76	53	5	s+; Act5C-GAL4_53	s+; Act5C-GAL4_53_5
s+; Act5C-GAL4	83	53	6	s+; Act5C-GAL4_53	s+; Act5C-GAL4_53_6
s+; Act5C-GAL4	77	53	7	s+; Act5C-GAL4_53	s+; Act5C-GAL4_53_7
s+; Act5C-GAL4	84	53	8	s+; Act5C-GAL4_53	s+; Act5C-GAL4_53_8
s+; Act5C-GAL4	66	53	9	s+; Act5C-GAL4_53	s+; Act5C-GAL4_53_9
s+; Act5C-GAL4	84	53	10	s+; Act5C-GAL4_53	s+; Act5C-GAL4_53_10
s+; Act5C-GAL4	74	53	11	s+; Act5C-GAL4_53	s+; Act5C-GAL4_53_11
s+; Act5C-GAL4	76	53	12	s+; Act5C-GAL4_53	s+; Act5C-GAL4_53_12
s+; Act5C-GAL4	79	53	13	s+; Act5C-GAL4_53	s+; Act5C-GAL4_53_13
s+; Act5C-GAL4	78	53	14	s+; Act5C-GAL4_53	s+; Act5C-GAL4_53_14
s+; Act5C-GAL4	78	53	15	s+; Act5C-GAL4_53	s+; Act5C-GAL4_53_15
s+; Act5C-GAL4	76	53	16	s+; Act5C-GAL4_53	s+; Act5C-GAL4_53_16
s+; Act5C-GAL4	88	53	17	s+; Act5C-GAL4_53	s+; Act5C-GAL4_53_17
s+; Act5C-GAL4	92	53	18	s+; Act5C-GAL4_53	s+; Act5C-GAL4_53_18
s+; Act5C-GAL4	78	53	19	s+; Act5C-GAL4_53	s+; Act5C-GAL4_53_19
s+; Act5C-GAL4	75	53	20	s+; Act5C-GAL4_53	s+; Act5C-GAL4_53_20
s+; Act5C-GAL4	69	54	1	s+; Act5C-GAL4_54	s+; Act5C-GAL4_54_1
s+; Act5C-GAL4	63	54	2	s+; Act5C-GAL4_54	s+; Act5C-GAL4_54_2
s+; Act5C-GAL4	71	54	3	s+; Act5C-GAL4_54	s+; Act5C-GAL4_54_3
s+; Act5C-GAL4	75	54	4	s+; Act5C-GAL4_54	s+; Act5C-GAL4_54_4
s+; Act5C-GAL4	61	54	5	s+; Act5C-GAL4_54	s+; Act5C-GAL4_54_5
s+; Act5C-GAL4	72	54	6	s+; Act5C-GAL4_54	s+; Act5C-GAL4_54_6
s+; Act5C-GAL4	66	54	7	s+; Act5C-GAL4_54	s+; Act5C-GAL4_54_7
s+; Act5C-GAL4	71	54	8	s+; Act5C-GAL4_54	s+; Act5C-GAL4_54_8
s+; Act5C-GAL4	68	54	9	s+; Act5C-GAL4_54	s+; Act5C-GAL4_54_9
s+; Act5C-GAL4	80	54	10	s+; Act5C-GAL4_54	s+; Act5C-GAL4_54_10
s+; Act5C-GAL4	77	54	11	s+; Act5C-GAL4_54	s+; Act5C-GAL4_54_11
s+; Act5C-GAL4	62	54	12	s+; Act5C-GAL4_54	s+; Act5C-GAL4_54_12
s+; Act5C-GAL4	72	54	13	s+; Act5C-GAL4_54	s+; Act5C-GAL4_54_13
s+; Act5C-GAL4	84	54	14	s+; Act5C-GAL4_54	s+; Act5C-GAL4_54_14
s+; Act5C-GAL4	73	54	15	s+; Act5C-GAL4_54	s+; Act5C-GAL4_54_15
s+; Act5C-GAL4	82	54	16	s+; Act5C-GAL4_54	s+; Act5C-GAL4_54_16
s+; Act5C-GAL4	79	54	17	s+; Act5C-GAL4_54	s+; Act5C-GAL4_54_17
s+; Act5C-GAL4	79	54	18	s+; Act5C-GAL4_54	s+; Act5C-GAL4_54_18
s+; Act5C-GAL4	97	54	19	s+; Act5C-GAL4_54	s+; Act5C-GAL4_54_19
s+; Act5C-GAL4	86	54	20	s+; Act5C-GAL4_54	s+; Act5C-GAL4_54_20
s+; Act5C-GAL4	78	55	1	s+; Act5C-GAL4_55	s+; Act5C-GAL4_55_1
s+; Act5C-GAL4	74	55	2	s+; Act5C-GAL4_55	s+; Act5C-GAL4_55_2
s+; Act5C-GAL4	78	55	3	s+; Act5C-GAL4_55	s+; Act5C-GAL4_55_3
s+; Act5C-GAL4	84	55	4	s+; Act5C-GAL4_55	s+; Act5C-GAL4_55_4
s+; Act5C-GAL4	86	55	5	s+; Act5C-GAL4_55	s+; Act5C-GAL4_55_5
s+; Act5C-GAL4	99	55	6	s+; Act5C-GAL4_55	s+; Act5C-GAL4_55_6
s+; Act5C-GAL4	73	55	7	s+; Act5C-GAL4_55	s+; Act5C-GAL4_55_7
s+; Act5C-GAL4	79	55	8	s+; Act5C-GAL4_55	s+; Act5C-GAL4_55_8
s+; Act5C-GAL4	79	55	9	s+; Act5C-GAL4_55	s+; Act5C-GAL4_55_9
s+; Act5C-GAL4	87	55	10	s+; Act5C-GAL4_55	s+; Act5C-GAL4_55_10
s+; Act5C-GAL4	84	55	11	s+; Act5C-GAL4_55	s+; Act5C-GAL4_55_11
s+; Act5C-GAL4	90	55	12	s+; Act5C-GAL4_55	s+; Act5C-GAL4_55_12
s+; Act5C-GAL4	75	55	13	s+; Act5C-GAL4_55	s+; Act5C-GAL4_55_13
s+; Act5C-GAL4	76	55	14	s+; Act5C-GAL4_55	s+; Act5C-GAL4_55_14
s+; Act5C-GAL4	73	55	15	s+; Act5C-GAL4_55	s+; Act5C-GAL4_55_15
s+; Act5C-GAL4	71	55	16	s+; Act5C-GAL4_55	s+; Act5C-GAL4_55_16
s+; Act5C-GAL4	77	55	17	s+; Act5C-GAL4_55	s+; Act5C-GAL4_55_17
s+; Act5C-GAL4	69	55	18	s+; Act5C-GAL4_55	s+; Act5C-GAL4_55_18
s+; Act5C-GAL4	87	55	19	s+; Act5C-GAL4_55	s+; Act5C-GAL4_55_19
s+; Act5C-GAL4	79	55	20	s+; Act5C-GAL4_55	s+; Act5C-GAL4_55_20
s+; Act5C-GAL4	70	56	1	s+; Act5C-GAL4_56	s+; Act5C-GAL4_56_1
s+; Act5C-GAL4	62	56	2	s+; Act5C-GAL4_56	s+; Act5C-GAL4_56_2
s+; Act5C-GAL4	72	56	3	s+; Act5C-GAL4_56	s+; Act5C-GAL4_56_3
s+; Act5C-GAL4	63	56	4	s+; Act5C-GAL4_56	s+; Act5C-GAL4_56_4
s+; Act5C-GAL4	57	56	5	s+; Act5C-GAL4_56	s+; Act5C-GAL4_56_5
s+; Act5C-GAL4	70	56	6	s+; Act5C-GAL4_56	s+; Act5C-GAL4_56_6
s+; Act5C-GAL4	70	56	7	s+; Act5C-GAL4_56	s+; Act5C-GAL4_56_7
s+; Act5C-GAL4	70	56	8	s+; Act5C-GAL4_56	s+; Act5C-GAL4_56_8
s+; Act5C-GAL4	60	56	9	s+; Act5C-GAL4_56	s+; Act5C-GAL4_56_9
s+; Act5C-GAL4	58	56	10	s+; Act5C-GAL4_56	s+; Act5C-GAL4_56_10
s+; Act5C-GAL4	57	56	11	s+; Act5C-GAL4_56	s+; Act5C-GAL4_56_11
s+; Act5C-GAL4	68	56	12	s+; Act5C-GAL4_56	s+; Act5C-GAL4_56_12
s+; Act5C-GAL4	58	56	13	s+; Act5C-GAL4_56	s+; Act5C-GAL4_56_13
s+; Act5C-GAL4	66	56	14	s+; Act5C-GAL4_56	s+; Act5C-GAL4_56_14
s+; Act5C-GAL4	69	56	15	s+; Act5C-GAL4_56	s+; Act5C-GAL4_56_15
s+; Act5C-GAL4	74	56	16	s+; Act5C-GAL4_56	s+; Act5C-GAL4_56_16
s+; Act5C-GAL4	70	56	17	s+; Act5C-GAL4_56	s+; Act5C-GAL4_56_17
s+; Act5C-GAL4	62	56	18	s+; Act5C-GAL4_56	s+; Act5C-GAL4_56_18
s+; Act5C-GAL4	67	56	19	s+; Act5C-GAL4_56	s+; Act5C-GAL4_56_19
s+; Act5C-GAL4	58	56	20	s+; Act5C-GAL4_56	s+; Act5C-GAL4_56_20
s+; Act5C-GAL4	52	57	1	s+; Act5C-GAL4_57	s+; Act5C-GAL4_57_1
s+; Act5C-GAL4	43	57	2	s+; Act5C-GAL4_57	s+; Act5C-GAL4_57_2
s+; Act5C-GAL4	50	57	3	s+; Act5C-GAL4_57	s+; Act5C-GAL4_57_3
s+; Act5C-GAL4	52	57	4	s+; Act5C-GAL4_57	s+; Act5C-GAL4_57_4
s+; Act5C-GAL4	52	57	5	s+; Act5C-GAL4_57	s+; Act5C-GAL4_57_5
s+; Act5C-GAL4	46	57	6	s+; Act5C-GAL4_57	s+; Act5C-GAL4_57_6
s+; Act5C-GAL4	45	57	7	s+; Act5C-GAL4_57	s+; Act5C-GAL4_57_7
s+; Act5C-GAL4	47	57	8	s+; Act5C-GAL4_57	s+; Act5C-GAL4_57_8
s+; Act5C-GAL4	54	57	9	s+; Act5C-GAL4_57	s+; Act5C-GAL4_57_9
s+; Act5C-GAL4	43	57	10	s+; Act5C-GAL4_57	s+; Act5C-GAL4_57_10
s+; Act5C-GAL4	47	57	11	s+; Act5C-GAL4_57	s+; Act5C-GAL4_57_11
s+; Act5C-GAL4	39	57	12	s+; Act5C-GAL4_57	s+; Act5C-GAL4_57_12
s+; Act5C-GAL4	45	57	13	s+; Act5C-GAL4_57	s+; Act5C-GAL4_57_13
s+; Act5C-GAL4	47	57	14	s+; Act5C-GAL4_57	s+; Act5C-GAL4_57_14
s+; Act5C-GAL4	61	57	15	s+; Act5C-GAL4_57	s+; Act5C-GAL4_57_15
s+; Act5C-GAL4	39	57	16	s+; Act5C-GAL4_57	s+; Act5C-GAL4_57_16
s+; Act5C-GAL4	44	57	17	s+; Act5C-GAL4_57	s+; Act5C-GAL4_57_17
s+; Act5C-GAL4	52	57	18	s+; Act5C-GAL4_57	s+; Act5C-GAL4_57_18
s+; Act5C-GAL4	43	57	19	s+; Act5C-GAL4_57	s+; Act5C-GAL4_57_19
s+; Act5C-GAL4	47	57	20	s+; Act5C-GAL4_57	s+; Act5C-GAL4_57_20
s+; Act5C-GAL4	63	58	1	s+; Act5C-GAL4_58	s+; Act5C-GAL4_58_1
s+; Act5C-GAL4	77	58	2	s+; Act5C-GAL4_58	s+; Act5C-GAL4_58_2
s+; Act5C-GAL4	71	58	3	s+; Act5C-GAL4_58	s+; Act5C-GAL4_58_3
s+; Act5C-GAL4	63	58	4	s+; Act5C-GAL4_58	s+; Act5C-GAL4_58_4
s+; Act5C-GAL4	63	58	5	s+; Act5C-GAL4_58	s+; Act5C-GAL4_58_5
s+; Act5C-GAL4	78	58	6	s+; Act5C-GAL4_58	s+; Act5C-GAL4_58_6
s+; Act5C-GAL4	83	58	7	s+; Act5C-GAL4_58	s+; Act5C-GAL4_58_7
s+; Act5C-GAL4	64	58	8	s+; Act5C-GAL4_58	s+; Act5C-GAL4_58_8
s+; Act5C-GAL4	58	58	9	s+; Act5C-GAL4_58	s+; Act5C-GAL4_58_9
s+; Act5C-GAL4	59	58	10	s+; Act5C-GAL4_58	s+; Act5C-GAL4_58_10
s+; Act5C-GAL4	65	58	11	s+; Act5C-GAL4_58	s+; Act5C-GAL4_58_11
s+; Act5C-GAL4	58	58	12	s+; Act5C-GAL4_58	s+; Act5C-GAL4_58_12
s+; Act5C-GAL4	69	58	13	s+; Act5C-GAL4_58	s+; Act5C-GAL4_58_13
s+; Act5C-GAL4	65	58	14	s+; Act5C-GAL4_58	s+; Act5C-GAL4_58_14
s+; Act5C-GAL4	69	58	15	s+; Act5C-GAL4_58	s+; Act5C-GAL4_58_15
s+; Act5C-GAL4	67	58	16	s+; Act5C-GAL4_58	s+; Act5C-GAL4_58_16
s+; Act5C-GAL4	64	58	17	s+; Act5C-GAL4_58	s+; Act5C-GAL4_58_17
s+; Act5C-GAL4	71	58	18	s+; Act5C-GAL4_58	s+; Act5C-GAL4_58_18
s+; Act5C-GAL4	62	58	19	s+; Act5C-GAL4_58	s+; Act5C-GAL4_58_19
s+; Act5C-GAL4	67	58	20	s+; Act5C-GAL4_58	s+; Act5C-GAL4_58_20
s+; Act5C-GAL4	85	59	1	s+; Act5C-GAL4_59	s+; Act5C-GAL4_59_1
s+; Act5C-GAL4	75	59	2	s+; Act5C-GAL4_59	s+; Act5C-GAL4_59_2
s+; Act5C-GAL4	88	59	3	s+; Act5C-GAL4_59	s+; Act5C-GAL4_59_3
s+; Act5C-GAL4	86	59	4	s+; Act5C-GAL4_59	s+; Act5C-GAL4_59_4
s+; Act5C-GAL4	89	59	5	s+; Act5C-GAL4_59	s+; Act5C-GAL4_59_5
s+; Act5C-GAL4	57	59	6	s+; Act5C-GAL4_59	s+; Act5C-GAL4_59_6
s+; Act5C-GAL4	78	59	7	s+; Act5C-GAL4_59	s+; Act5C-GAL4_59_7
s+; Act5C-GAL4	82	59	8	s+; Act5C-GAL4_59	s+; Act5C-GAL4_59_8
s+; Act5C-GAL4	79	59	9	s+; Act5C-GAL4_59	s+; Act5C-GAL4_59_9
s+; Act5C-GAL4	65	59	10	s+; Act5C-GAL4_59	s+; Act5C-GAL4_59_10
s+; Act5C-GAL4	65	59	11	s+; Act5C-GAL4_59	s+; Act5C-GAL4_59_11
s+; Act5C-GAL4	74	59	12	s+; Act5C-GAL4_59	s+; Act5C-GAL4_59_12
s+; Act5C-GAL4	86	59	13	s+; Act5C-GAL4_59	s+; Act5C-GAL4_59_13
s+; Act5C-GAL4	95	59	14	s+; Act5C-GAL4_59	s+; Act5C-GAL4_59_14
s+; Act5C-GAL4	78	59	15	s+; Act5C-GAL4_59	s+; Act5C-GAL4_59_15
s+; Act5C-GAL4	75	59	16	s+; Act5C-GAL4_59	s+; Act5C-GAL4_59_16
s+; Act5C-GAL4	77	59	17	s+; Act5C-GAL4_59	s+; Act5C-GAL4_59_17
s+; Act5C-GAL4	79	59	18	s+; Act5C-GAL4_59	s+; Act5C-GAL4_59_18
s+; Act5C-GAL4	70	59	19	s+; Act5C-GAL4_59	s+; Act5C-GAL4_59_19
s+; Act5C-GAL4	74	59	20	s+; Act5C-GAL4_59	s+; Act5C-GAL4_59_20
s+; Act5C-GAL4	60	60	1	s+; Act5C-GAL4_60	s+; Act5C-GAL4_60_1
s+; Act5C-GAL4	59	60	2	s+; Act5C-GAL4_60	s+; Act5C-GAL4_60_2
s+; Act5C-GAL4	77	60	3	s+; Act5C-GAL4_60	s+; Act5C-GAL4_60_3
s+; Act5C-GAL4	76	60	4	s+; Act5C-GAL4_60	s+; Act5C-GAL4_60_4
s+; Act5C-GAL4	75	60	5	s+; Act5C-GAL4_60	s+; Act5C-GAL4_60_5
s+; Act5C-GAL4	82	60	6	s+; Act5C-GAL4_60	s+; Act5C-GAL4_60_6
s+; Act5C-GAL4	68	60	7	s+; Act5C-GAL4_60	s+; Act5C-GAL4_60_7
s+; Act5C-GAL4	68	60	8	s+; Act5C-GAL4_60	s+; Act5C-GAL4_60_8
s+; Act5C-GAL4	71	60	9	s+; Act5C-GAL4_60	s+; Act5C-GAL4_60_9
s+; Act5C-GAL4	68	60	10	s+; Act5C-GAL4_60	s+; Act5C-GAL4_60_10
s+; Act5C-GAL4	86	60	11	s+; Act5C-GAL4_60	s+; Act5C-GAL4_60_11
s+; Act5C-GAL4	76	60	12	s+; Act5C-GAL4_60	s+; Act5C-GAL4_60_12
s+; Act5C-GAL4	74	60	13	s+; Act5C-GAL4_60	s+; Act5C-GAL4_60_13
s+; Act5C-GAL4	77	60	14	s+; Act5C-GAL4_60	s+; Act5C-GAL4_60_14
s+; Act5C-GAL4	71	60	15	s+; Act5C-GAL4_60	s+; Act5C-GAL4_60_15
s+; Act5C-GAL4	79	60	16	s+; Act5C-GAL4_60	s+; Act5C-GAL4_60_16
s+; Act5C-GAL4	75	60	17	s+; Act5C-GAL4_60	s+; Act5C-GAL4_60_17
s+; Act5C-GAL4	85	60	18	s+; Act5C-GAL4_60	s+; Act5C-GAL4_60_18
s+; Act5C-GAL4	74	60	19	s+; Act5C-GAL4_60	s+; Act5C-GAL4_60_19
s+; Act5C-GAL4	81	60	20	s+; Act5C-GAL4_60	s+; Act5C-GAL4_60_20
s+; UAS-Yippee	84	1	1	s+; UAS-Yippee_1	s+; UAS-Yippee_1_1
s+; UAS-Yippee	68	1	2	s+; UAS-Yippee_1	s+; UAS-Yippee_1_2
s+; UAS-Yippee	82	1	3	s+; UAS-Yippee_1	s+; UAS-Yippee_1_3
s+; UAS-Yippee	88	1	4	s+; UAS-Yippee_1	s+; UAS-Yippee_1_4
s+; UAS-Yippee	84	1	5	s+; UAS-Yippee_1	s+; UAS-Yippee_1_5
s+; UAS-Yippee	85	1	6	s+; UAS-Yippee_1	s+; UAS-Yippee_1_6
s+; UAS-Yippee	83	1	7	s+; UAS-Yippee_1	s+; UAS-Yippee_1_7
s+; UAS-Yippee	68	1	8	s+; UAS-Yippee_1	s+; UAS-Yippee_1_8
s+; UAS-Yippee	84	1	9	s+; UAS-Yippee_1	s+; UAS-Yippee_1_9
s+; UAS-Yippee	89	1	10	s+; UAS-Yippee_1	s+; UAS-Yippee_1_10
s+; UAS-Yippee	81	1	11	s+; UAS-Yippee_1	s+; UAS-Yippee_1_11
s+; UAS-Yippee	81	1	12	s+; UAS-Yippee_1	s+; UAS-Yippee_1_12
s+; UAS-Yippee	79	1	13	s+; UAS-Yippee_1	s+; UAS-Yippee_1_13
s+; UAS-Yippee	82	1	14	s+; UAS-Yippee_1	s+; UAS-Yippee_1_14
s+; UAS-Yippee	78	1	15	s+; UAS-Yippee_1	s+; UAS-Yippee_1_15
s+; UAS-Yippee	73	1	16	s+; UAS-Yippee_1	s+; UAS-Yippee_1_16
s+; UAS-Yippee	75	1	17	s+; UAS-Yippee_1	s+; UAS-Yippee_1_17
s+; UAS-Yippee	71	1	18	s+; UAS-Yippee_1	s+; UAS-Yippee_1_18
s+; UAS-Yippee	81	1	19	s+; UAS-Yippee_1	s+; UAS-Yippee_1_19
s+; UAS-Yippee	82	1	20	s+; UAS-Yippee_1	s+; UAS-Yippee_1_20
s+; UAS-Yippee	58	2	1	s+; UAS-Yippee_2	s+; UAS-Yippee_2_1
s+; UAS-Yippee	92	2	2	s+; UAS-Yippee_2	s+; UAS-Yippee_2_2
s+; UAS-Yippee	79	2	3	s+; UAS-Yippee_2	s+; UAS-Yippee_2_3
s+; UAS-Yippee	100	2	4	s+; UAS-Yippee_2	s+; UAS-Yippee_2_4
s+; UAS-Yippee	85	2	5	s+; UAS-Yippee_2	s+; UAS-Yippee_2_5
s+; UAS-Yippee	82	2	6	s+; UAS-Yippee_2	s+; UAS-Yippee_2_6
s+; UAS-Yippee	85	2	7	s+; UAS-Yippee_2	s+; UAS-Yippee_2_7
s+; UAS-Yippee	77	2	8	s+; UAS-Yippee_2	s+; UAS-Yippee_2_8
s+; UAS-Yippee	96	2	9	s+; UAS-Yippee_2	s+; UAS-Yippee_2_9
s+; UAS-Yippee	84	2	10	s+; UAS-Yippee_2	s+; UAS-Yippee_2_10
s+; UAS-Yippee	89	2	11	s+; UAS-Yippee_2	s+; UAS-Yippee_2_11
s+; UAS-Yippee	71	2	12	s+; UAS-Yippee_2	s+; UAS-Yippee_2_12
s+; UAS-Yippee	87	2	13	s+; UAS-Yippee_2	s+; UAS-Yippee_2_13
s+; UAS-Yippee	94	2	14	s+; UAS-Yippee_2	s+; UAS-Yippee_2_14
s+; UAS-Yippee	88	2	15	s+; UAS-Yippee_2	s+; UAS-Yippee_2_15
s+; UAS-Yippee	100	2	16	s+; UAS-Yippee_2	s+; UAS-Yippee_2_16
s+; UAS-Yippee	108	2	17	s+; UAS-Yippee_2	s+; UAS-Yippee_2_17
s+; UAS-Yippee	96	2	18	s+; UAS-Yippee_2	s+; UAS-Yippee_2_18
s+; UAS-Yippee	84	2	19	s+; UAS-Yippee_2	s+; UAS-Yippee_2_19
s+; UAS-Yippee	95	2	20	s+; UAS-Yippee_2	s+; UAS-Yippee_2_20
s+; UAS-Yippee	76	3	1	s+; UAS-Yippee_3	s+; UAS-Yippee_3_1
s+; UAS-Yippee	100	3	2	s+; UAS-Yippee_3	s+; UAS-Yippee_3_2
s+; UAS-Yippee	87	3	3	s+; UAS-Yippee_3	s+; UAS-Yippee_3_3
s+; UAS-Yippee	79	3	4	s+; UAS-Yippee_3	s+; UAS-Yippee_3_4
s+; UAS-Yippee	87	3	5	s+; UAS-Yippee_3	s+; UAS-Yippee_3_5
s+; UAS-Yippee	59	3	6	s+; UAS-Yippee_3	s+; UAS-Yippee_3_6
s+; UAS-Yippee	66	3	7	s+; UAS-Yippee_3	s+; UAS-Yippee_3_7
s+; UAS-Yippee	75	3	8	s+; UAS-Yippee_3	s+; UAS-Yippee_3_8
s+; UAS-Yippee	76	3	9	s+; UAS-Yippee_3	s+; UAS-Yippee_3_9
s+; UAS-Yippee	77	3	10	s+; UAS-Yippee_3	s+; UAS-Yippee_3_10
s+; UAS-Yippee	79	3	11	s+; UAS-Yippee_3	s+; UAS-Yippee_3_11
s+; UAS-Yippee	80	3	12	s+; UAS-Yippee_3	s+; UAS-Yippee_3_12
s+; UAS-Yippee	75	3	13	s+; UAS-Yippee_3	s+; UAS-Yippee_3_13
s+; UAS-Yippee	79	3	14	s+; UAS-Yippee_3	s+; UAS-Yippee_3_14
s+; UAS-Yippee	87	3	15	s+; UAS-Yippee_3	s+; UAS-Yippee_3_15
s+; UAS-Yippee	79	3	16	s+; UAS-Yippee_3	s+; UAS-Yippee_3_16
s+; UAS-Yippee	78	3	17	s+; UAS-Yippee_3	s+; UAS-Yippee_3_17
s+; UAS-Yippee	89	3	18	s+; UAS-Yippee_3	s+; UAS-Yippee_3_18
s+; UAS-Yippee	79	3	19	s+; UAS-Yippee_3	s+; UAS-Yippee_3_19
s+; UAS-Yippee	70	3	20	s+; UAS-Yippee_3	s+; UAS-Yippee_3_20
s+; UAS-Yippee	95	4	1	s+; UAS-Yippee_4	s+; UAS-Yippee_4_1
s+; UAS-Yippee	96	4	2	s+; UAS-Yippee_4	s+; UAS-Yippee_4_2
s+; UAS-Yippee	88	4	3	s+; UAS-Yippee_4	s+; UAS-Yippee_4_3
s+; UAS-Yippee	105	4	4	s+; UAS-Yippee_4	s+; UAS-Yippee_4_4
s+; UAS-Yippee	97	4	5	s+; UAS-Yippee_4	s+; UAS-Yippee_4_5
s+; UAS-Yippee	97	4	6	s+; UAS-Yippee_4	s+; UAS-Yippee_4_6
s+; UAS-Yippee	78	4	7	s+; UAS-Yippee_4	s+; UAS-Yippee_4_7
s+; UAS-Yippee	92	4	8	s+; UAS-Yippee_4	s+; UAS-Yippee_4_8
s+; UAS-Yippee	96	4	9	s+; UAS-Yippee_4	s+; UAS-Yippee_4_9
s+; UAS-Yippee	96	4	10	s+; UAS-Yippee_4	s+; UAS-Yippee_4_10
s+; UAS-Yippee	92	4	11	s+; UAS-Yippee_4	s+; UAS-Yippee_4_11
s+; UAS-Yippee	87	4	12	s+; UAS-Yippee_4	s+; UAS-Yippee_4_12
s+; UAS-Yippee	93	4	13	s+; UAS-Yippee_4	s+; UAS-Yippee_4_13
s+; UAS-Yippee	82	4	14	s+; UAS-Yippee_4	s+; UAS-Yippee_4_14
s+; UAS-Yippee	107	4	15	s+; UAS-Yippee_4	s+; UAS-Yippee_4_15
s+; UAS-Yippee	91	4	16	s+; UAS-Yippee_4	s+; UAS-Yippee_4_16
s+; UAS-Yippee	89	4	17	s+; UAS-Yippee_4	s+; UAS-Yippee_4_17
s+; UAS-Yippee	96	4	18	s+; UAS-Yippee_4	s+; UAS-Yippee_4_18
s+; UAS-Yippee	87	4	19	s+; UAS-Yippee_4	s+; UAS-Yippee_4_19
s+; UAS-Yippee	101	4	20	s+; UAS-Yippee_4	s+; UAS-Yippee_4_20
s+; UAS-Yippee	100	5	1	s+; UAS-Yippee_5	s+; UAS-Yippee_5_1
s+; UAS-Yippee	88	5	2	s+; UAS-Yippee_5	s+; UAS-Yippee_5_2
s+; UAS-Yippee	87	5	3	s+; UAS-Yippee_5	s+; UAS-Yippee_5_3
s+; UAS-Yippee	84	5	4	s+; UAS-Yippee_5	s+; UAS-Yippee_5_4
s+; UAS-Yippee	84	5	5	s+; UAS-Yippee_5	s+; UAS-Yippee_5_5
s+; UAS-Yippee	92	5	6	s+; UAS-Yippee_5	s+; UAS-Yippee_5_6
s+; UAS-Yippee	89	5	7	s+; UAS-Yippee_5	s+; UAS-Yippee_5_7
s+; UAS-Yippee	89	5	8	s+; UAS-Yippee_5	s+; UAS-Yippee_5_8
s+; UAS-Yippee	93	5	9	s+; UAS-Yippee_5	s+; UAS-Yippee_5_9
s+; UAS-Yippee	97	5	10	s+; UAS-Yippee_5	s+; UAS-Yippee_5_10
s+; UAS-Yippee	90	5	11	s+; UAS-Yippee_5	s+; UAS-Yippee_5_11
s+; UAS-Yippee	89	5	12	s+; UAS-Yippee_5	s+; UAS-Yippee_5_12
s+; UAS-Yippee	102	5	13	s+; UAS-Yippee_5	s+; UAS-Yippee_5_13
s+; UAS-Yippee	87	5	14	s+; UAS-Yippee_5	s+; UAS-Yippee_5_14
s+; UAS-Yippee	100	5	15	s+; UAS-Yippee_5	s+; UAS-Yippee_5_15
s+; UAS-Yippee	91	5	16	s+; UAS-Yippee_5	s+; UAS-Yippee_5_16
s+; UAS-Yippee	87	5	17	s+; UAS-Yippee_5	s+; UAS-Yippee_5_17
s+; UAS-Yippee	84	5	18	s+; UAS-Yippee_5	s+; UAS-Yippee_5_18
s+; UAS-Yippee	93	5	19	s+; UAS-Yippee_5	s+; UAS-Yippee_5_19
s+; UAS-Yippee	99	5	20	s+; UAS-Yippee_5	s+; UAS-Yippee_5_20
s+; UAS-Yippee	78	6	1	s+; UAS-Yippee_6	s+; UAS-Yippee_6_1
s+; UAS-Yippee	82	6	2	s+; UAS-Yippee_6	s+; UAS-Yippee_6_2
s+; UAS-Yippee	95	6	3	s+; UAS-Yippee_6	s+; UAS-Yippee_6_3
s+; UAS-Yippee	92	6	4	s+; UAS-Yippee_6	s+; UAS-Yippee_6_4
s+; UAS-Yippee	97	6	5	s+; UAS-Yippee_6	s+; UAS-Yippee_6_5
s+; UAS-Yippee	86	6	6	s+; UAS-Yippee_6	s+; UAS-Yippee_6_6
s+; UAS-Yippee	93	6	7	s+; UAS-Yippee_6	s+; UAS-Yippee_6_7
s+; UAS-Yippee	93	6	8	s+; UAS-Yippee_6	s+; UAS-Yippee_6_8
s+; UAS-Yippee	88	6	9	s+; UAS-Yippee_6	s+; UAS-Yippee_6_9
s+; UAS-Yippee	101	6	10	s+; UAS-Yippee_6	s+; UAS-Yippee_6_10
s+; UAS-Yippee	100	6	11	s+; UAS-Yippee_6	s+; UAS-Yippee_6_11
s+; UAS-Yippee	87	6	12	s+; UAS-Yippee_6	s+; UAS-Yippee_6_12
s+; UAS-Yippee	74	6	13	s+; UAS-Yippee_6	s+; UAS-Yippee_6_13
s+; UAS-Yippee	81	6	14	s+; UAS-Yippee_6	s+; UAS-Yippee_6_14
s+; UAS-Yippee	98	6	15	s+; UAS-Yippee_6	s+; UAS-Yippee_6_15
s+; UAS-Yippee	91	6	16	s+; UAS-Yippee_6	s+; UAS-Yippee_6_16
s+; UAS-Yippee	92	6	17	s+; UAS-Yippee_6	s+; UAS-Yippee_6_17
s+; UAS-Yippee	84	6	18	s+; UAS-Yippee_6	s+; UAS-Yippee_6_18
s+; UAS-Yippee	91	6	19	s+; UAS-Yippee_6	s+; UAS-Yippee_6_19
s+; UAS-Yippee	93	6	20	s+; UAS-Yippee_6	s+; UAS-Yippee_6_20
s+; UAS-Yippee	67	7	1	s+; UAS-Yippee_7	s+; UAS-Yippee_7_1
s+; UAS-Yippee	67	7	2	s+; UAS-Yippee_7	s+; UAS-Yippee_7_2
s+; UAS-Yippee	62	7	3	s+; UAS-Yippee_7	s+; UAS-Yippee_7_3
s+; UAS-Yippee	83	7	4	s+; UAS-Yippee_7	s+; UAS-Yippee_7_4
s+; UAS-Yippee	85	7	5	s+; UAS-Yippee_7	s+; UAS-Yippee_7_5
s+; UAS-Yippee	77	7	6	s+; UAS-Yippee_7	s+; UAS-Yippee_7_6
s+; UAS-Yippee	75	7	7	s+; UAS-Yippee_7	s+; UAS-Yippee_7_7
s+; UAS-Yippee	89	7	8	s+; UAS-Yippee_7	s+; UAS-Yippee_7_8
s+; UAS-Yippee	68	7	9	s+; UAS-Yippee_7	s+; UAS-Yippee_7_9
s+; UAS-Yippee	85	7	10	s+; UAS-Yippee_7	s+; UAS-Yippee_7_10
s+; UAS-Yippee	91	7	11	s+; UAS-Yippee_7	s+; UAS-Yippee_7_11
s+; UAS-Yippee	74	7	12	s+; UAS-Yippee_7	s+; UAS-Yippee_7_12
s+; UAS-Yippee	76	7	13	s+; UAS-Yippee_7	s+; UAS-Yippee_7_13
s+; UAS-Yippee	59	7	14	s+; UAS-Yippee_7	s+; UAS-Yippee_7_14
s+; UAS-Yippee	84	7	15	s+; UAS-Yippee_7	s+; UAS-Yippee_7_15
s+; UAS-Yippee	77	7	16	s+; UAS-Yippee_7	s+; UAS-Yippee_7_16
s+; UAS-Yippee	66	7	17	s+; UAS-Yippee_7	s+; UAS-Yippee_7_17
s+; UAS-Yippee	77	7	18	s+; UAS-Yippee_7	s+; UAS-Yippee_7_18
s+; UAS-Yippee	67	7	19	s+; UAS-Yippee_7	s+; UAS-Yippee_7_19
s+; UAS-Yippee	85	7	20	s+; UAS-Yippee_7	s+; UAS-Yippee_7_20
s+; UAS-Yippee	72	8	1	s+; UAS-Yippee_8	s+; UAS-Yippee_8_1
s+; UAS-Yippee	111	8	2	s+; UAS-Yippee_8	s+; UAS-Yippee_8_2
s+; UAS-Yippee	106	8	3	s+; UAS-Yippee_8	s+; UAS-Yippee_8_3
s+; UAS-Yippee	101	8	4	s+; UAS-Yippee_8	s+; UAS-Yippee_8_4
s+; UAS-Yippee	107	8	5	s+; UAS-Yippee_8	s+; UAS-Yippee_8_5
s+; UAS-Yippee	100	8	6	s+; UAS-Yippee_8	s+; UAS-Yippee_8_6
s+; UAS-Yippee	75	8	7	s+; UAS-Yippee_8	s+; UAS-Yippee_8_7
s+; UAS-Yippee	105	8	8	s+; UAS-Yippee_8	s+; UAS-Yippee_8_8
s+; UAS-Yippee	110	8	9	s+; UAS-Yippee_8	s+; UAS-Yippee_8_9
s+; UAS-Yippee	100	8	10	s+; UAS-Yippee_8	s+; UAS-Yippee_8_10
s+; UAS-Yippee	82	8	11	s+; UAS-Yippee_8	s+; UAS-Yippee_8_11
s+; UAS-Yippee	89	8	12	s+; UAS-Yippee_8	s+; UAS-Yippee_8_12
s+; UAS-Yippee	101	8	13	s+; UAS-Yippee_8	s+; UAS-Yippee_8_13
s+; UAS-Yippee	100	8	14	s+; UAS-Yippee_8	s+; UAS-Yippee_8_14
s+; UAS-Yippee	93	8	15	s+; UAS-Yippee_8	s+; UAS-Yippee_8_15
s+; UAS-Yippee	96	8	16	s+; UAS-Yippee_8	s+; UAS-Yippee_8_16
s+; UAS-Yippee	96	8	17	s+; UAS-Yippee_8	s+; UAS-Yippee_8_17
s+; UAS-Yippee	92	8	18	s+; UAS-Yippee_8	s+; UAS-Yippee_8_18
s+; UAS-Yippee	114	8	19	s+; UAS-Yippee_8	s+; UAS-Yippee_8_19
s+; UAS-Yippee	107	8	20	s+; UAS-Yippee_8	s+; UAS-Yippee_8_20
s+; UAS-Yippee	81	9	1	s+; UAS-Yippee_9	s+; UAS-Yippee_9_1
s+; UAS-Yippee	84	9	2	s+; UAS-Yippee_9	s+; UAS-Yippee_9_2
s+; UAS-Yippee	94	9	3	s+; UAS-Yippee_9	s+; UAS-Yippee_9_3
s+; UAS-Yippee	89	9	4	s+; UAS-Yippee_9	s+; UAS-Yippee_9_4
s+; UAS-Yippee	100	9	5	s+; UAS-Yippee_9	s+; UAS-Yippee_9_5
s+; UAS-Yippee	104	9	6	s+; UAS-Yippee_9	s+; UAS-Yippee_9_6
s+; UAS-Yippee	70	9	7	s+; UAS-Yippee_9	s+; UAS-Yippee_9_7
s+; UAS-Yippee	92	9	8	s+; UAS-Yippee_9	s+; UAS-Yippee_9_8
s+; UAS-Yippee	100	9	9	s+; UAS-Yippee_9	s+; UAS-Yippee_9_9
s+; UAS-Yippee	79	9	10	s+; UAS-Yippee_9	s+; UAS-Yippee_9_10
s+; UAS-Yippee	91	9	11	s+; UAS-Yippee_9	s+; UAS-Yippee_9_11
s+; UAS-Yippee	98	9	12	s+; UAS-Yippee_9	s+; UAS-Yippee_9_12
s+; UAS-Yippee	102	9	13	s+; UAS-Yippee_9	s+; UAS-Yippee_9_13
s+; UAS-Yippee	93	9	14	s+; UAS-Yippee_9	s+; UAS-Yippee_9_14
s+; UAS-Yippee	96	9	15	s+; UAS-Yippee_9	s+; UAS-Yippee_9_15
s+; UAS-Yippee	98	9	16	s+; UAS-Yippee_9	s+; UAS-Yippee_9_16
s+; UAS-Yippee	82	9	17	s+; UAS-Yippee_9	s+; UAS-Yippee_9_17
s+; UAS-Yippee	92	9	18	s+; UAS-Yippee_9	s+; UAS-Yippee_9_18
s+; UAS-Yippee	93	9	19	s+; UAS-Yippee_9	s+; UAS-Yippee_9_19
s+; UAS-Yippee	95	9	20	s+; UAS-Yippee_9	s+; UAS-Yippee_9_20
s+; UAS-Yippee	52	10	1	s+; UAS-Yippee_10	s+; UAS-Yippee_10_1
s+; UAS-Yippee	86	10	2	s+; UAS-Yippee_10	s+; UAS-Yippee_10_2
s+; UAS-Yippee	77	10	3	s+; UAS-Yippee_10	s+; UAS-Yippee_10_3
s+; UAS-Yippee	87	10	4	s+; UAS-Yippee_10	s+; UAS-Yippee_10_4
s+; UAS-Yippee	100	10	5	s+; UAS-Yippee_10	s+; UAS-Yippee_10_5
s+; UAS-Yippee	72	10	6	s+; UAS-Yippee_10	s+; UAS-Yippee_10_6
s+; UAS-Yippee	77	10	7	s+; UAS-Yippee_10	s+; UAS-Yippee_10_7
s+; UAS-Yippee	65	10	8	s+; UAS-Yippee_10	s+; UAS-Yippee_10_8
s+; UAS-Yippee	90	10	9	s+; UAS-Yippee_10	s+; UAS-Yippee_10_9
s+; UAS-Yippee	88	10	10	s+; UAS-Yippee_10	s+; UAS-Yippee_10_10
s+; UAS-Yippee	56	10	11	s+; UAS-Yippee_10	s+; UAS-Yippee_10_11
s+; UAS-Yippee	71	10	12	s+; UAS-Yippee_10	s+; UAS-Yippee_10_12
s+; UAS-Yippee	56	10	13	s+; UAS-Yippee_10	s+; UAS-Yippee_10_13
s+; UAS-Yippee	54	10	14	s+; UAS-Yippee_10	s+; UAS-Yippee_10_14
s+; UAS-Yippee	85	10	15	s+; UAS-Yippee_10	s+; UAS-Yippee_10_15
s+; UAS-Yippee	77	10	16	s+; UAS-Yippee_10	s+; UAS-Yippee_10_16
s+; UAS-Yippee	63	10	17	s+; UAS-Yippee_10	s+; UAS-Yippee_10_17
s+; UAS-Yippee	64	10	18	s+; UAS-Yippee_10	s+; UAS-Yippee_10_18
s+; UAS-Yippee	76	10	19	s+; UAS-Yippee_10	s+; UAS-Yippee_10_19
s+; UAS-Yippee	74	10	20	s+; UAS-Yippee_10	s+; UAS-Yippee_10_20
s+; UAS-Yippee	80	11	1	s+; UAS-Yippee_11	s+; UAS-Yippee_11_1
s+; UAS-Yippee	85	11	2	s+; UAS-Yippee_11	s+; UAS-Yippee_11_2
s+; UAS-Yippee	73	11	3	s+; UAS-Yippee_11	s+; UAS-Yippee_11_3
s+; UAS-Yippee	76	11	4	s+; UAS-Yippee_11	s+; UAS-Yippee_11_4
s+; UAS-Yippee	72	11	5	s+; UAS-Yippee_11	s+; UAS-Yippee_11_5
s+; UAS-Yippee	88	11	6	s+; UAS-Yippee_11	s+; UAS-Yippee_11_6
s+; UAS-Yippee	75	11	7	s+; UAS-Yippee_11	s+; UAS-Yippee_11_7
s+; UAS-Yippee	77	11	8	s+; UAS-Yippee_11	s+; UAS-Yippee_11_8
s+; UAS-Yippee	72	11	9	s+; UAS-Yippee_11	s+; UAS-Yippee_11_9
s+; UAS-Yippee	79	11	10	s+; UAS-Yippee_11	s+; UAS-Yippee_11_10
s+; UAS-Yippee	89	11	11	s+; UAS-Yippee_11	s+; UAS-Yippee_11_11
s+; UAS-Yippee	78	11	12	s+; UAS-Yippee_11	s+; UAS-Yippee_11_12
s+; UAS-Yippee	86	11	13	s+; UAS-Yippee_11	s+; UAS-Yippee_11_13
s+; UAS-Yippee	74	11	14	s+; UAS-Yippee_11	s+; UAS-Yippee_11_14
s+; UAS-Yippee	69	11	15	s+; UAS-Yippee_11	s+; UAS-Yippee_11_15
s+; UAS-Yippee	97	11	16	s+; UAS-Yippee_11	s+; UAS-Yippee_11_16
s+; UAS-Yippee	82	11	17	s+; UAS-Yippee_11	s+; UAS-Yippee_11_17
s+; UAS-Yippee	75	11	18	s+; UAS-Yippee_11	s+; UAS-Yippee_11_18
s+; UAS-Yippee	63	11	19	s+; UAS-Yippee_11	s+; UAS-Yippee_11_19
s+; UAS-Yippee	90	11	20	s+; UAS-Yippee_11	s+; UAS-Yippee_11_20
s+; UAS-Yippee	64	12	1	s+; UAS-Yippee_12	s+; UAS-Yippee_12_1
s+; UAS-Yippee	82	12	2	s+; UAS-Yippee_12	s+; UAS-Yippee_12_2
s+; UAS-Yippee	75	12	3	s+; UAS-Yippee_12	s+; UAS-Yippee_12_3
s+; UAS-Yippee	80	12	4	s+; UAS-Yippee_12	s+; UAS-Yippee_12_4
s+; UAS-Yippee	83	12	5	s+; UAS-Yippee_12	s+; UAS-Yippee_12_5
s+; UAS-Yippee	80	12	6	s+; UAS-Yippee_12	s+; UAS-Yippee_12_6
s+; UAS-Yippee	73	12	7	s+; UAS-Yippee_12	s+; UAS-Yippee_12_7
s+; UAS-Yippee	84	12	8	s+; UAS-Yippee_12	s+; UAS-Yippee_12_8
s+; UAS-Yippee	70	12	9	s+; UAS-Yippee_12	s+; UAS-Yippee_12_9
s+; UAS-Yippee	88	12	10	s+; UAS-Yippee_12	s+; UAS-Yippee_12_10
s+; UAS-Yippee	85	12	11	s+; UAS-Yippee_12	s+; UAS-Yippee_12_11
s+; UAS-Yippee	81	12	12	s+; UAS-Yippee_12	s+; UAS-Yippee_12_12
s+; UAS-Yippee	80	12	13	s+; UAS-Yippee_12	s+; UAS-Yippee_12_13
s+; UAS-Yippee	88	12	14	s+; UAS-Yippee_12	s+; UAS-Yippee_12_14
s+; UAS-Yippee	76	12	15	s+; UAS-Yippee_12	s+; UAS-Yippee_12_15
s+; UAS-Yippee	82	12	16	s+; UAS-Yippee_12	s+; UAS-Yippee_12_16
s+; UAS-Yippee	57	12	17	s+; UAS-Yippee_12	s+; UAS-Yippee_12_17
s+; UAS-Yippee	78	12	18	s+; UAS-Yippee_12	s+; UAS-Yippee_12_18
s+; UAS-Yippee	73	12	19	s+; UAS-Yippee_12	s+; UAS-Yippee_12_19
s+; UAS-Yippee	79	12	20	s+; UAS-Yippee_12	s+; UAS-Yippee_12_20
s+; UAS-Yippee	100	13	1	s+; UAS-Yippee_13	s+; UAS-Yippee_13_1
s+; UAS-Yippee	85	13	2	s+; UAS-Yippee_13	s+; UAS-Yippee_13_2
s+; UAS-Yippee	92	13	3	s+; UAS-Yippee_13	s+; UAS-Yippee_13_3
s+; UAS-Yippee	103	13	4	s+; UAS-Yippee_13	s+; UAS-Yippee_13_4
s+; UAS-Yippee	75	13	5	s+; UAS-Yippee_13	s+; UAS-Yippee_13_5
s+; UAS-Yippee	106	13	6	s+; UAS-Yippee_13	s+; UAS-Yippee_13_6
s+; UAS-Yippee	92	13	7	s+; UAS-Yippee_13	s+; UAS-Yippee_13_7
s+; UAS-Yippee	97	13	8	s+; UAS-Yippee_13	s+; UAS-Yippee_13_8
s+; UAS-Yippee	67	13	9	s+; UAS-Yippee_13	s+; UAS-Yippee_13_9
s+; UAS-Yippee	98	13	10	s+; UAS-Yippee_13	s+; UAS-Yippee_13_10
s+; UAS-Yippee	112	13	11	s+; UAS-Yippee_13	s+; UAS-Yippee_13_11
s+; UAS-Yippee	103	13	12	s+; UAS-Yippee_13	s+; UAS-Yippee_13_12
s+; UAS-Yippee	93	13	13	s+; UAS-Yippee_13	s+; UAS-Yippee_13_13
s+; UAS-Yippee	78	13	14	s+; UAS-Yippee_13	s+; UAS-Yippee_13_14
s+; UAS-Yippee	98	13	15	s+; UAS-Yippee_13	s+; UAS-Yippee_13_15
s+; UAS-Yippee	90	13	16	s+; UAS-Yippee_13	s+; UAS-Yippee_13_16
s+; UAS-Yippee	96	13	17	s+; UAS-Yippee_13	s+; UAS-Yippee_13_17
s+; UAS-Yippee	91	13	18	s+; UAS-Yippee_13	s+; UAS-Yippee_13_18
s+; UAS-Yippee	101	13	19	s+; UAS-Yippee_13	s+; UAS-Yippee_13_19
s+; UAS-Yippee	99	13	20	s+; UAS-Yippee_13	s+; UAS-Yippee_13_20
s+; UAS-Yippee	80	14	1	s+; UAS-Yippee_14	s+; UAS-Yippee_14_1
s+; UAS-Yippee	73	14	2	s+; UAS-Yippee_14	s+; UAS-Yippee_14_2
s+; UAS-Yippee	71	14	3	s+; UAS-Yippee_14	s+; UAS-Yippee_14_3
s+; UAS-Yippee	74	14	4	s+; UAS-Yippee_14	s+; UAS-Yippee_14_4
s+; UAS-Yippee	82	14	5	s+; UAS-Yippee_14	s+; UAS-Yippee_14_5
s+; UAS-Yippee	93	14	6	s+; UAS-Yippee_14	s+; UAS-Yippee_14_6
s+; UAS-Yippee	79	14	7	s+; UAS-Yippee_14	s+; UAS-Yippee_14_7
s+; UAS-Yippee	82	14	8	s+; UAS-Yippee_14	s+; UAS-Yippee_14_8
s+; UAS-Yippee	85	14	9	s+; UAS-Yippee_14	s+; UAS-Yippee_14_9
s+; UAS-Yippee	74	14	10	s+; UAS-Yippee_14	s+; UAS-Yippee_14_10
s+; UAS-Yippee	84	14	11	s+; UAS-Yippee_14	s+; UAS-Yippee_14_11
s+; UAS-Yippee	91	14	12	s+; UAS-Yippee_14	s+; UAS-Yippee_14_12
s+; UAS-Yippee	90	14	13	s+; UAS-Yippee_14	s+; UAS-Yippee_14_13
s+; UAS-Yippee	74	14	14	s+; UAS-Yippee_14	s+; UAS-Yippee_14_14
s+; UAS-Yippee	79	14	15	s+; UAS-Yippee_14	s+; UAS-Yippee_14_15
s+; UAS-Yippee	89	14	16	s+; UAS-Yippee_14	s+; UAS-Yippee_14_16
s+; UAS-Yippee	85	14	17	s+; UAS-Yippee_14	s+; UAS-Yippee_14_17
s+; UAS-Yippee	80	14	18	s+; UAS-Yippee_14	s+; UAS-Yippee_14_18
s+; UAS-Yippee	55	14	19	s+; UAS-Yippee_14	s+; UAS-Yippee_14_19
s+; UAS-Yippee	73	14	20	s+; UAS-Yippee_14	s+; UAS-Yippee_14_20
s+; UAS-Yippee	73	15	1	s+; UAS-Yippee_15	s+; UAS-Yippee_15_1
s+; UAS-Yippee	72	15	2	s+; UAS-Yippee_15	s+; UAS-Yippee_15_2
s+; UAS-Yippee	82	15	3	s+; UAS-Yippee_15	s+; UAS-Yippee_15_3
s+; UAS-Yippee	70	15	4	s+; UAS-Yippee_15	s+; UAS-Yippee_15_4
s+; UAS-Yippee	82	15	5	s+; UAS-Yippee_15	s+; UAS-Yippee_15_5
s+; UAS-Yippee	85	15	6	s+; UAS-Yippee_15	s+; UAS-Yippee_15_6
s+; UAS-Yippee	80	15	7	s+; UAS-Yippee_15	s+; UAS-Yippee_15_7
s+; UAS-Yippee	79	15	8	s+; UAS-Yippee_15	s+; UAS-Yippee_15_8
s+; UAS-Yippee	75	15	9	s+; UAS-Yippee_15	s+; UAS-Yippee_15_9
s+; UAS-Yippee	78	15	10	s+; UAS-Yippee_15	s+; UAS-Yippee_15_10
s+; UAS-Yippee	75	15	11	s+; UAS-Yippee_15	s+; UAS-Yippee_15_11
s+; UAS-Yippee	66	15	12	s+; UAS-Yippee_15	s+; UAS-Yippee_15_12
s+; UAS-Yippee	77	15	13	s+; UAS-Yippee_15	s+; UAS-Yippee_15_13
s+; UAS-Yippee	70	15	14	s+; UAS-Yippee_15	s+; UAS-Yippee_15_14
s+; UAS-Yippee	76	15	15	s+; UAS-Yippee_15	s+; UAS-Yippee_15_15
s+; UAS-Yippee	76	15	16	s+; UAS-Yippee_15	s+; UAS-Yippee_15_16
s+; UAS-Yippee	74	15	17	s+; UAS-Yippee_15	s+; UAS-Yippee_15_17
s+; UAS-Yippee	77	15	18	s+; UAS-Yippee_15	s+; UAS-Yippee_15_18
s+; UAS-Yippee	90	15	19	s+; UAS-Yippee_15	s+; UAS-Yippee_15_19
s+; UAS-Yippee	79	15	20	s+; UAS-Yippee_15	s+; UAS-Yippee_15_20
s+; UAS-Yippee	86	16	1	s+; UAS-Yippee_16	s+; UAS-Yippee_16_1
s+; UAS-Yippee	77	16	2	s+; UAS-Yippee_16	s+; UAS-Yippee_16_2
s+; UAS-Yippee	81	16	3	s+; UAS-Yippee_16	s+; UAS-Yippee_16_3
s+; UAS-Yippee	92	16	4	s+; UAS-Yippee_16	s+; UAS-Yippee_16_4
s+; UAS-Yippee	90	16	5	s+; UAS-Yippee_16	s+; UAS-Yippee_16_5
s+; UAS-Yippee	94	16	6	s+; UAS-Yippee_16	s+; UAS-Yippee_16_6
s+; UAS-Yippee	85	16	7	s+; UAS-Yippee_16	s+; UAS-Yippee_16_7
s+; UAS-Yippee	90	16	8	s+; UAS-Yippee_16	s+; UAS-Yippee_16_8
s+; UAS-Yippee	90	16	9	s+; UAS-Yippee_16	s+; UAS-Yippee_16_9
s+; UAS-Yippee	79	16	10	s+; UAS-Yippee_16	s+; UAS-Yippee_16_10
s+; UAS-Yippee	81	16	11	s+; UAS-Yippee_16	s+; UAS-Yippee_16_11
s+; UAS-Yippee	89	16	12	s+; UAS-Yippee_16	s+; UAS-Yippee_16_12
s+; UAS-Yippee	70	16	13	s+; UAS-Yippee_16	s+; UAS-Yippee_16_13
s+; UAS-Yippee	81	16	14	s+; UAS-Yippee_16	s+; UAS-Yippee_16_14
s+; UAS-Yippee	76	16	15	s+; UAS-Yippee_16	s+; UAS-Yippee_16_15
s+; UAS-Yippee	76	16	16	s+; UAS-Yippee_16	s+; UAS-Yippee_16_16
s+; UAS-Yippee	72	16	17	s+; UAS-Yippee_16	s+; UAS-Yippee_16_17
s+; UAS-Yippee	80	16	18	s+; UAS-Yippee_16	s+; UAS-Yippee_16_18
s+; UAS-Yippee	82	16	19	s+; UAS-Yippee_16	s+; UAS-Yippee_16_19
s+; UAS-Yippee	89	16	20	s+; UAS-Yippee_16	s+; UAS-Yippee_16_20
s+; UAS-Yippee	81	17	1	s+; UAS-Yippee_17	s+; UAS-Yippee_17_1
s+; UAS-Yippee	75	17	2	s+; UAS-Yippee_17	s+; UAS-Yippee_17_2
s+; UAS-Yippee	90	17	3	s+; UAS-Yippee_17	s+; UAS-Yippee_17_3
s+; UAS-Yippee	90	17	4	s+; UAS-Yippee_17	s+; UAS-Yippee_17_4
s+; UAS-Yippee	85	17	5	s+; UAS-Yippee_17	s+; UAS-Yippee_17_5
s+; UAS-Yippee	88	17	6	s+; UAS-Yippee_17	s+; UAS-Yippee_17_6
s+; UAS-Yippee	90	17	7	s+; UAS-Yippee_17	s+; UAS-Yippee_17_7
s+; UAS-Yippee	88	17	8	s+; UAS-Yippee_17	s+; UAS-Yippee_17_8
s+; UAS-Yippee	76	17	9	s+; UAS-Yippee_17	s+; UAS-Yippee_17_9
s+; UAS-Yippee	84	17	10	s+; UAS-Yippee_17	s+; UAS-Yippee_17_10
s+; UAS-Yippee	84	17	11	s+; UAS-Yippee_17	s+; UAS-Yippee_17_11
s+; UAS-Yippee	84	17	12	s+; UAS-Yippee_17	s+; UAS-Yippee_17_12
s+; UAS-Yippee	88	17	13	s+; UAS-Yippee_17	s+; UAS-Yippee_17_13
s+; UAS-Yippee	82	17	14	s+; UAS-Yippee_17	s+; UAS-Yippee_17_14
s+; UAS-Yippee	89	17	15	s+; UAS-Yippee_17	s+; UAS-Yippee_17_15
s+; UAS-Yippee	95	17	16	s+; UAS-Yippee_17	s+; UAS-Yippee_17_16
s+; UAS-Yippee	89	17	17	s+; UAS-Yippee_17	s+; UAS-Yippee_17_17
s+; UAS-Yippee	90	17	18	s+; UAS-Yippee_17	s+; UAS-Yippee_17_18
s+; UAS-Yippee	77	17	19	s+; UAS-Yippee_17	s+; UAS-Yippee_17_19
s+; UAS-Yippee	92	17	20	s+; UAS-Yippee_17	s+; UAS-Yippee_17_20
s+; UAS-Yippee	83	18	1	s+; UAS-Yippee_18	s+; UAS-Yippee_18_1
s+; UAS-Yippee	65	18	2	s+; UAS-Yippee_18	s+; UAS-Yippee_18_2
s+; UAS-Yippee	81	18	3	s+; UAS-Yippee_18	s+; UAS-Yippee_18_3
s+; UAS-Yippee	78	18	4	s+; UAS-Yippee_18	s+; UAS-Yippee_18_4
s+; UAS-Yippee	86	18	5	s+; UAS-Yippee_18	s+; UAS-Yippee_18_5
s+; UAS-Yippee	74	18	6	s+; UAS-Yippee_18	s+; UAS-Yippee_18_6
s+; UAS-Yippee	68	18	7	s+; UAS-Yippee_18	s+; UAS-Yippee_18_7
s+; UAS-Yippee	58	18	8	s+; UAS-Yippee_18	s+; UAS-Yippee_18_8
s+; UAS-Yippee	54	18	9	s+; UAS-Yippee_18	s+; UAS-Yippee_18_9
s+; UAS-Yippee	87	18	10	s+; UAS-Yippee_18	s+; UAS-Yippee_18_10
s+; UAS-Yippee	80	18	11	s+; UAS-Yippee_18	s+; UAS-Yippee_18_11
s+; UAS-Yippee	72	18	12	s+; UAS-Yippee_18	s+; UAS-Yippee_18_12
s+; UAS-Yippee	87	18	13	s+; UAS-Yippee_18	s+; UAS-Yippee_18_13
s+; UAS-Yippee	78	18	14	s+; UAS-Yippee_18	s+; UAS-Yippee_18_14
s+; UAS-Yippee	68	18	15	s+; UAS-Yippee_18	s+; UAS-Yippee_18_15
s+; UAS-Yippee	85	18	16	s+; UAS-Yippee_18	s+; UAS-Yippee_18_16
s+; UAS-Yippee	56	18	17	s+; UAS-Yippee_18	s+; UAS-Yippee_18_17
s+; UAS-Yippee	82	18	18	s+; UAS-Yippee_18	s+; UAS-Yippee_18_18
s+; UAS-Yippee	92	18	19	s+; UAS-Yippee_18	s+; UAS-Yippee_18_19
s+; UAS-Yippee	69	18	20	s+; UAS-Yippee_18	s+; UAS-Yippee_18_20
s+; UAS-Yippee	56	19	1	s+; UAS-Yippee_19	s+; UAS-Yippee_19_1
s+; UAS-Yippee	73	19	2	s+; UAS-Yippee_19	s+; UAS-Yippee_19_2
s+; UAS-Yippee	72	19	3	s+; UAS-Yippee_19	s+; UAS-Yippee_19_3
s+; UAS-Yippee	83	19	4	s+; UAS-Yippee_19	s+; UAS-Yippee_19_4
s+; UAS-Yippee	82	19	5	s+; UAS-Yippee_19	s+; UAS-Yippee_19_5
s+; UAS-Yippee	75	19	6	s+; UAS-Yippee_19	s+; UAS-Yippee_19_6
s+; UAS-Yippee	50	19	7	s+; UAS-Yippee_19	s+; UAS-Yippee_19_7
s+; UAS-Yippee	66	19	8	s+; UAS-Yippee_19	s+; UAS-Yippee_19_8
s+; UAS-Yippee	71	19	9	s+; UAS-Yippee_19	s+; UAS-Yippee_19_9
s+; UAS-Yippee	66	19	10	s+; UAS-Yippee_19	s+; UAS-Yippee_19_10
s+; UAS-Yippee	65	19	11	s+; UAS-Yippee_19	s+; UAS-Yippee_19_11
s+; UAS-Yippee	72	19	12	s+; UAS-Yippee_19	s+; UAS-Yippee_19_12
s+; UAS-Yippee	73	19	13	s+; UAS-Yippee_19	s+; UAS-Yippee_19_13
s+; UAS-Yippee	69	19	14	s+; UAS-Yippee_19	s+; UAS-Yippee_19_14
s+; UAS-Yippee	67	19	15	s+; UAS-Yippee_19	s+; UAS-Yippee_19_15
s+; UAS-Yippee	70	19	16	s+; UAS-Yippee_19	s+; UAS-Yippee_19_16
s+; UAS-Yippee	80	19	17	s+; UAS-Yippee_19	s+; UAS-Yippee_19_17
s+; UAS-Yippee	85	19	18	s+; UAS-Yippee_19	s+; UAS-Yippee_19_18
s+; UAS-Yippee	74	19	19	s+; UAS-Yippee_19	s+; UAS-Yippee_19_19
s+; UAS-Yippee	78	19	20	s+; UAS-Yippee_19	s+; UAS-Yippee_19_20
s+; UAS-Yippee	75	20	1	s+; UAS-Yippee_20	s+; UAS-Yippee_20_1
s+; UAS-Yippee	80	20	2	s+; UAS-Yippee_20	s+; UAS-Yippee_20_2
s+; UAS-Yippee	79	20	3	s+; UAS-Yippee_20	s+; UAS-Yippee_20_3
s+; UAS-Yippee	86	20	4	s+; UAS-Yippee_20	s+; UAS-Yippee_20_4
s+; UAS-Yippee	93	20	5	s+; UAS-Yippee_20	s+; UAS-Yippee_20_5
s+; UAS-Yippee	80	20	6	s+; UAS-Yippee_20	s+; UAS-Yippee_20_6
s+; UAS-Yippee	47	20	7	s+; UAS-Yippee_20	s+; UAS-Yippee_20_7
s+; UAS-Yippee	82	20	8	s+; UAS-Yippee_20	s+; UAS-Yippee_20_8
s+; UAS-Yippee	84	20	9	s+; UAS-Yippee_20	s+; UAS-Yippee_20_9
s+; UAS-Yippee	62	20	10	s+; UAS-Yippee_20	s+; UAS-Yippee_20_10
s+; UAS-Yippee	82	20	11	s+; UAS-Yippee_20	s+; UAS-Yippee_20_11
s+; UAS-Yippee	76	20	12	s+; UAS-Yippee_20	s+; UAS-Yippee_20_12
s+; UAS-Yippee	75	20	13	s+; UAS-Yippee_20	s+; UAS-Yippee_20_13
s+; UAS-Yippee	73	20	14	s+; UAS-Yippee_20	s+; UAS-Yippee_20_14
s+; UAS-Yippee	74	20	15	s+; UAS-Yippee_20	s+; UAS-Yippee_20_15
s+; UAS-Yippee	76	20	16	s+; UAS-Yippee_20	s+; UAS-Yippee_20_16
s+; UAS-Yippee	74	20	17	s+; UAS-Yippee_20	s+; UAS-Yippee_20_17
s+; UAS-Yippee	82	20	18	s+; UAS-Yippee_20	s+; UAS-Yippee_20_18
s+; UAS-Yippee	74	20	19	s+; UAS-Yippee_20	s+; UAS-Yippee_20_19
s+; UAS-Yippee	88	20	20	s+; UAS-Yippee_20	s+; UAS-Yippee_20_20
s+; UAS-Yippee	66	21	1	s+; UAS-Yippee_21	s+; UAS-Yippee_21_1
s+; UAS-Yippee	75	21	2	s+; UAS-Yippee_21	s+; UAS-Yippee_21_2
s+; UAS-Yippee	79	21	3	s+; UAS-Yippee_21	s+; UAS-Yippee_21_3
s+; UAS-Yippee	95	21	4	s+; UAS-Yippee_21	s+; UAS-Yippee_21_4
s+; UAS-Yippee	93	21	5	s+; UAS-Yippee_21	s+; UAS-Yippee_21_5
s+; UAS-Yippee	81	21	6	s+; UAS-Yippee_21	s+; UAS-Yippee_21_6
s+; UAS-Yippee	73	21	7	s+; UAS-Yippee_21	s+; UAS-Yippee_21_7
s+; UAS-Yippee	91	21	8	s+; UAS-Yippee_21	s+; UAS-Yippee_21_8
s+; UAS-Yippee	84	21	9	s+; UAS-Yippee_21	s+; UAS-Yippee_21_9
s+; UAS-Yippee	73	21	10	s+; UAS-Yippee_21	s+; UAS-Yippee_21_10
s+; UAS-Yippee	76	21	11	s+; UAS-Yippee_21	s+; UAS-Yippee_21_11
s+; UAS-Yippee	83	21	12	s+; UAS-Yippee_21	s+; UAS-Yippee_21_12
s+; UAS-Yippee	83	21	13	s+; UAS-Yippee_21	s+; UAS-Yippee_21_13
s+; UAS-Yippee	84	21	14	s+; UAS-Yippee_21	s+; UAS-Yippee_21_14
s+; UAS-Yippee	85	21	15	s+; UAS-Yippee_21	s+; UAS-Yippee_21_15
s+; UAS-Yippee	78	21	16	s+; UAS-Yippee_21	s+; UAS-Yippee_21_16
s+; UAS-Yippee	74	21	17	s+; UAS-Yippee_21	s+; UAS-Yippee_21_17
s+; UAS-Yippee	83	21	18	s+; UAS-Yippee_21	s+; UAS-Yippee_21_18
s+; UAS-Yippee	81	21	19	s+; UAS-Yippee_21	s+; UAS-Yippee_21_19
s+; UAS-Yippee	77	21	20	s+; UAS-Yippee_21	s+; UAS-Yippee_21_20
s+; UAS-Yippee	72	22	1	s+; UAS-Yippee_22	s+; UAS-Yippee_22_1
s+; UAS-Yippee	62	22	2	s+; UAS-Yippee_22	s+; UAS-Yippee_22_2
s+; UAS-Yippee	60	22	3	s+; UAS-Yippee_22	s+; UAS-Yippee_22_3
s+; UAS-Yippee	72	22	4	s+; UAS-Yippee_22	s+; UAS-Yippee_22_4
s+; UAS-Yippee	61	22	5	s+; UAS-Yippee_22	s+; UAS-Yippee_22_5
s+; UAS-Yippee	73	22	6	s+; UAS-Yippee_22	s+; UAS-Yippee_22_6
s+; UAS-Yippee	78	22	7	s+; UAS-Yippee_22	s+; UAS-Yippee_22_7
s+; UAS-Yippee	61	22	8	s+; UAS-Yippee_22	s+; UAS-Yippee_22_8
s+; UAS-Yippee	70	22	9	s+; UAS-Yippee_22	s+; UAS-Yippee_22_9
s+; UAS-Yippee	54	22	10	s+; UAS-Yippee_22	s+; UAS-Yippee_22_10
s+; UAS-Yippee	49	22	11	s+; UAS-Yippee_22	s+; UAS-Yippee_22_11
s+; UAS-Yippee	70	22	12	s+; UAS-Yippee_22	s+; UAS-Yippee_22_12
s+; UAS-Yippee	79	22	13	s+; UAS-Yippee_22	s+; UAS-Yippee_22_13
s+; UAS-Yippee	82	22	14	s+; UAS-Yippee_22	s+; UAS-Yippee_22_14
s+; UAS-Yippee	80	22	15	s+; UAS-Yippee_22	s+; UAS-Yippee_22_15
s+; UAS-Yippee	74	22	16	s+; UAS-Yippee_22	s+; UAS-Yippee_22_16
s+; UAS-Yippee	78	22	17	s+; UAS-Yippee_22	s+; UAS-Yippee_22_17
s+; UAS-Yippee	69	22	18	s+; UAS-Yippee_22	s+; UAS-Yippee_22_18
s+; UAS-Yippee	66	22	19	s+; UAS-Yippee_22	s+; UAS-Yippee_22_19
s+; UAS-Yippee	60	22	20	s+; UAS-Yippee_22	s+; UAS-Yippee_22_20
s+; UAS-Yippee	74	23	1	s+; UAS-Yippee_23	s+; UAS-Yippee_23_1
s+; UAS-Yippee	75	23	2	s+; UAS-Yippee_23	s+; UAS-Yippee_23_2
s+; UAS-Yippee	73	23	3	s+; UAS-Yippee_23	s+; UAS-Yippee_23_3
s+; UAS-Yippee	75	23	4	s+; UAS-Yippee_23	s+; UAS-Yippee_23_4
s+; UAS-Yippee	71	23	5	s+; UAS-Yippee_23	s+; UAS-Yippee_23_5
s+; UAS-Yippee	71	23	6	s+; UAS-Yippee_23	s+; UAS-Yippee_23_6
s+; UAS-Yippee	73	23	7	s+; UAS-Yippee_23	s+; UAS-Yippee_23_7
s+; UAS-Yippee	82	23	8	s+; UAS-Yippee_23	s+; UAS-Yippee_23_8
s+; UAS-Yippee	70	23	9	s+; UAS-Yippee_23	s+; UAS-Yippee_23_9
s+; UAS-Yippee	44	23	10	s+; UAS-Yippee_23	s+; UAS-Yippee_23_10
s+; UAS-Yippee	60	23	11	s+; UAS-Yippee_23	s+; UAS-Yippee_23_11
s+; UAS-Yippee	63	23	12	s+; UAS-Yippee_23	s+; UAS-Yippee_23_12
s+; UAS-Yippee	78	23	13	s+; UAS-Yippee_23	s+; UAS-Yippee_23_13
s+; UAS-Yippee	75	23	14	s+; UAS-Yippee_23	s+; UAS-Yippee_23_14
s+; UAS-Yippee	63	23	15	s+; UAS-Yippee_23	s+; UAS-Yippee_23_15
s+; UAS-Yippee	63	23	16	s+; UAS-Yippee_23	s+; UAS-Yippee_23_16
s+; UAS-Yippee	69	23	17	s+; UAS-Yippee_23	s+; UAS-Yippee_23_17
s+; UAS-Yippee	68	23	18	s+; UAS-Yippee_23	s+; UAS-Yippee_23_18
s+; UAS-Yippee	73	23	19	s+; UAS-Yippee_23	s+; UAS-Yippee_23_19
s+; UAS-Yippee	81	23	20	s+; UAS-Yippee_23	s+; UAS-Yippee_23_20
s+; UAS-Yippee	56	24	1	s+; UAS-Yippee_24	s+; UAS-Yippee_24_1
s+; UAS-Yippee	71	24	2	s+; UAS-Yippee_24	s+; UAS-Yippee_24_2
s+; UAS-Yippee	58	24	3	s+; UAS-Yippee_24	s+; UAS-Yippee_24_3
s+; UAS-Yippee	69	24	4	s+; UAS-Yippee_24	s+; UAS-Yippee_24_4
s+; UAS-Yippee	79	24	5	s+; UAS-Yippee_24	s+; UAS-Yippee_24_5
s+; UAS-Yippee	68	24	6	s+; UAS-Yippee_24	s+; UAS-Yippee_24_6
s+; UAS-Yippee	60	24	7	s+; UAS-Yippee_24	s+; UAS-Yippee_24_7
s+; UAS-Yippee	57	24	8	s+; UAS-Yippee_24	s+; UAS-Yippee_24_8
s+; UAS-Yippee	73	24	9	s+; UAS-Yippee_24	s+; UAS-Yippee_24_9
s+; UAS-Yippee	71	24	10	s+; UAS-Yippee_24	s+; UAS-Yippee_24_10
s+; UAS-Yippee	66	24	11	s+; UAS-Yippee_24	s+; UAS-Yippee_24_11
s+; UAS-Yippee	65	24	12	s+; UAS-Yippee_24	s+; UAS-Yippee_24_12
s+; UAS-Yippee	72	24	13	s+; UAS-Yippee_24	s+; UAS-Yippee_24_13
s+; UAS-Yippee	66	24	14	s+; UAS-Yippee_24	s+; UAS-Yippee_24_14
s+; UAS-Yippee	71	24	15	s+; UAS-Yippee_24	s+; UAS-Yippee_24_15
s+; UAS-Yippee	71	24	16	s+; UAS-Yippee_24	s+; UAS-Yippee_24_16
s+; UAS-Yippee	58	24	17	s+; UAS-Yippee_24	s+; UAS-Yippee_24_17
s+; UAS-Yippee	67	24	18	s+; UAS-Yippee_24	s+; UAS-Yippee_24_18
s+; UAS-Yippee	73	24	19	s+; UAS-Yippee_24	s+; UAS-Yippee_24_19
s+; UAS-Yippee	79	24	20	s+; UAS-Yippee_24	s+; UAS-Yippee_24_20
s+; UAS-Yippee	81	25	1	s+; UAS-Yippee_25	s+; UAS-Yippee_25_1
s+; UAS-Yippee	83	25	2	s+; UAS-Yippee_25	s+; UAS-Yippee_25_2
s+; UAS-Yippee	70	25	3	s+; UAS-Yippee_25	s+; UAS-Yippee_25_3
s+; UAS-Yippee	87	25	4	s+; UAS-Yippee_25	s+; UAS-Yippee_25_4
s+; UAS-Yippee	87	25	5	s+; UAS-Yippee_25	s+; UAS-Yippee_25_5
s+; UAS-Yippee	75	25	6	s+; UAS-Yippee_25	s+; UAS-Yippee_25_6
s+; UAS-Yippee	77	25	7	s+; UAS-Yippee_25	s+; UAS-Yippee_25_7
s+; UAS-Yippee	82	25	8	s+; UAS-Yippee_25	s+; UAS-Yippee_25_8
s+; UAS-Yippee	87	25	9	s+; UAS-Yippee_25	s+; UAS-Yippee_25_9
s+; UAS-Yippee	77	25	10	s+; UAS-Yippee_25	s+; UAS-Yippee_25_10
s+; UAS-Yippee	71	25	11	s+; UAS-Yippee_25	s+; UAS-Yippee_25_11
s+; UAS-Yippee	75	25	12	s+; UAS-Yippee_25	s+; UAS-Yippee_25_12
s+; UAS-Yippee	77	25	13	s+; UAS-Yippee_25	s+; UAS-Yippee_25_13
s+; UAS-Yippee	78	25	14	s+; UAS-Yippee_25	s+; UAS-Yippee_25_14
s+; UAS-Yippee	82	25	15	s+; UAS-Yippee_25	s+; UAS-Yippee_25_15
s+; UAS-Yippee	82	25	16	s+; UAS-Yippee_25	s+; UAS-Yippee_25_16
s+; UAS-Yippee	76	25	17	s+; UAS-Yippee_25	s+; UAS-Yippee_25_17
s+; UAS-Yippee	82	25	18	s+; UAS-Yippee_25	s+; UAS-Yippee_25_18
s+; UAS-Yippee	81	25	19	s+; UAS-Yippee_25	s+; UAS-Yippee_25_19
s+; UAS-Yippee	79	25	20	s+; UAS-Yippee_25	s+; UAS-Yippee_25_20
s+; UAS-Yippee	91	26	1	s+; UAS-Yippee_26	s+; UAS-Yippee_26_1
s+; UAS-Yippee	78	26	2	s+; UAS-Yippee_26	s+; UAS-Yippee_26_2
s+; UAS-Yippee	75	26	3	s+; UAS-Yippee_26	s+; UAS-Yippee_26_3
s+; UAS-Yippee	75	26	4	s+; UAS-Yippee_26	s+; UAS-Yippee_26_4
s+; UAS-Yippee	71	26	5	s+; UAS-Yippee_26	s+; UAS-Yippee_26_5
s+; UAS-Yippee	81	26	6	s+; UAS-Yippee_26	s+; UAS-Yippee_26_6
s+; UAS-Yippee	88	26	7	s+; UAS-Yippee_26	s+; UAS-Yippee_26_7
s+; UAS-Yippee	91	26	8	s+; UAS-Yippee_26	s+; UAS-Yippee_26_8
s+; UAS-Yippee	89	26	9	s+; UAS-Yippee_26	s+; UAS-Yippee_26_9
s+; UAS-Yippee	84	26	10	s+; UAS-Yippee_26	s+; UAS-Yippee_26_10
s+; UAS-Yippee	85	26	11	s+; UAS-Yippee_26	s+; UAS-Yippee_26_11
s+; UAS-Yippee	95	26	12	s+; UAS-Yippee_26	s+; UAS-Yippee_26_12
s+; UAS-Yippee	71	26	13	s+; UAS-Yippee_26	s+; UAS-Yippee_26_13
s+; UAS-Yippee	76	26	14	s+; UAS-Yippee_26	s+; UAS-Yippee_26_14
s+; UAS-Yippee	81	26	15	s+; UAS-Yippee_26	s+; UAS-Yippee_26_15
s+; UAS-Yippee	82	26	16	s+; UAS-Yippee_26	s+; UAS-Yippee_26_16
s+; UAS-Yippee	85	26	17	s+; UAS-Yippee_26	s+; UAS-Yippee_26_17
s+; UAS-Yippee	87	26	18	s+; UAS-Yippee_26	s+; UAS-Yippee_26_18
s+; UAS-Yippee	69	26	19	s+; UAS-Yippee_26	s+; UAS-Yippee_26_19
s+; UAS-Yippee	74	26	20	s+; UAS-Yippee_26	s+; UAS-Yippee_26_20
s+; UAS-Yippee	80	27	1	s+; UAS-Yippee_27	s+; UAS-Yippee_27_1
s+; UAS-Yippee	89	27	2	s+; UAS-Yippee_27	s+; UAS-Yippee_27_2
s+; UAS-Yippee	89	27	3	s+; UAS-Yippee_27	s+; UAS-Yippee_27_3
s+; UAS-Yippee	95	27	4	s+; UAS-Yippee_27	s+; UAS-Yippee_27_4
s+; UAS-Yippee	94	27	5	s+; UAS-Yippee_27	s+; UAS-Yippee_27_5
s+; UAS-Yippee	90	27	6	s+; UAS-Yippee_27	s+; UAS-Yippee_27_6
s+; UAS-Yippee	88	27	7	s+; UAS-Yippee_27	s+; UAS-Yippee_27_7
s+; UAS-Yippee	78	27	8	s+; UAS-Yippee_27	s+; UAS-Yippee_27_8
s+; UAS-Yippee	95	27	9	s+; UAS-Yippee_27	s+; UAS-Yippee_27_9
s+; UAS-Yippee	89	27	10	s+; UAS-Yippee_27	s+; UAS-Yippee_27_10
s+; UAS-Yippee	89	27	11	s+; UAS-Yippee_27	s+; UAS-Yippee_27_11
s+; UAS-Yippee	98	27	12	s+; UAS-Yippee_27	s+; UAS-Yippee_27_12
s+; UAS-Yippee	72	27	13	s+; UAS-Yippee_27	s+; UAS-Yippee_27_13
s+; UAS-Yippee	94	27	14	s+; UAS-Yippee_27	s+; UAS-Yippee_27_14
s+; UAS-Yippee	80	27	15	s+; UAS-Yippee_27	s+; UAS-Yippee_27_15
s+; UAS-Yippee	89	27	16	s+; UAS-Yippee_27	s+; UAS-Yippee_27_16
s+; UAS-Yippee	88	27	17	s+; UAS-Yippee_27	s+; UAS-Yippee_27_17
s+; UAS-Yippee	95	27	18	s+; UAS-Yippee_27	s+; UAS-Yippee_27_18
s+; UAS-Yippee	78	27	19	s+; UAS-Yippee_27	s+; UAS-Yippee_27_19
s+; UAS-Yippee	87	27	20	s+; UAS-Yippee_27	s+; UAS-Yippee_27_20
s+; UAS-Yippee	68	28	1	s+; UAS-Yippee_28	s+; UAS-Yippee_28_1
s+; UAS-Yippee	75	28	2	s+; UAS-Yippee_28	s+; UAS-Yippee_28_2
s+; UAS-Yippee	82	28	3	s+; UAS-Yippee_28	s+; UAS-Yippee_28_3
s+; UAS-Yippee	87	28	4	s+; UAS-Yippee_28	s+; UAS-Yippee_28_4
s+; UAS-Yippee	67	28	5	s+; UAS-Yippee_28	s+; UAS-Yippee_28_5
s+; UAS-Yippee	87	28	6	s+; UAS-Yippee_28	s+; UAS-Yippee_28_6
s+; UAS-Yippee	84	28	7	s+; UAS-Yippee_28	s+; UAS-Yippee_28_7
s+; UAS-Yippee	77	28	8	s+; UAS-Yippee_28	s+; UAS-Yippee_28_8
s+; UAS-Yippee	73	28	9	s+; UAS-Yippee_28	s+; UAS-Yippee_28_9
s+; UAS-Yippee	79	28	10	s+; UAS-Yippee_28	s+; UAS-Yippee_28_10
s+; UAS-Yippee	75	28	11	s+; UAS-Yippee_28	s+; UAS-Yippee_28_11
s+; UAS-Yippee	75	28	12	s+; UAS-Yippee_28	s+; UAS-Yippee_28_12
s+; UAS-Yippee	93	28	13	s+; UAS-Yippee_28	s+; UAS-Yippee_28_13
s+; UAS-Yippee	77	28	14	s+; UAS-Yippee_28	s+; UAS-Yippee_28_14
s+; UAS-Yippee	66	28	15	s+; UAS-Yippee_28	s+; UAS-Yippee_28_15
s+; UAS-Yippee	66	28	16	s+; UAS-Yippee_28	s+; UAS-Yippee_28_16
s+; UAS-Yippee	73	28	17	s+; UAS-Yippee_28	s+; UAS-Yippee_28_17
s+; UAS-Yippee	76	28	18	s+; UAS-Yippee_28	s+; UAS-Yippee_28_18
s+; UAS-Yippee	77	28	19	s+; UAS-Yippee_28	s+; UAS-Yippee_28_19
s+; UAS-Yippee	73	28	20	s+; UAS-Yippee_28	s+; UAS-Yippee_28_20
s+; UAS-Yippee	79	29	1	s+; UAS-Yippee_29	s+; UAS-Yippee_29_1
s+; UAS-Yippee	76	29	2	s+; UAS-Yippee_29	s+; UAS-Yippee_29_2
s+; UAS-Yippee	65	29	3	s+; UAS-Yippee_29	s+; UAS-Yippee_29_3
s+; UAS-Yippee	75	29	4	s+; UAS-Yippee_29	s+; UAS-Yippee_29_4
s+; UAS-Yippee	86	29	5	s+; UAS-Yippee_29	s+; UAS-Yippee_29_5
s+; UAS-Yippee	81	29	6	s+; UAS-Yippee_29	s+; UAS-Yippee_29_6
s+; UAS-Yippee	78	29	7	s+; UAS-Yippee_29	s+; UAS-Yippee_29_7
s+; UAS-Yippee	75	29	8	s+; UAS-Yippee_29	s+; UAS-Yippee_29_8
s+; UAS-Yippee	90	29	9	s+; UAS-Yippee_29	s+; UAS-Yippee_29_9
s+; UAS-Yippee	79	29	10	s+; UAS-Yippee_29	s+; UAS-Yippee_29_10
s+; UAS-Yippee	84	29	11	s+; UAS-Yippee_29	s+; UAS-Yippee_29_11
s+; UAS-Yippee	74	29	12	s+; UAS-Yippee_29	s+; UAS-Yippee_29_12
s+; UAS-Yippee	86	29	13	s+; UAS-Yippee_29	s+; UAS-Yippee_29_13
s+; UAS-Yippee	74	29	14	s+; UAS-Yippee_29	s+; UAS-Yippee_29_14
s+; UAS-Yippee	83	29	15	s+; UAS-Yippee_29	s+; UAS-Yippee_29_15
s+; UAS-Yippee	90	29	16	s+; UAS-Yippee_29	s+; UAS-Yippee_29_16
s+; UAS-Yippee	81	29	17	s+; UAS-Yippee_29	s+; UAS-Yippee_29_17
s+; UAS-Yippee	78	29	18	s+; UAS-Yippee_29	s+; UAS-Yippee_29_18
s+; UAS-Yippee	77	29	19	s+; UAS-Yippee_29	s+; UAS-Yippee_29_19
s+; UAS-Yippee	78	29	20	s+; UAS-Yippee_29	s+; UAS-Yippee_29_20
s+; UAS-Yippee	72	30	1	s+; UAS-Yippee_30	s+; UAS-Yippee_30_1
s+; UAS-Yippee	77	30	2	s+; UAS-Yippee_30	s+; UAS-Yippee_30_2
s+; UAS-Yippee	71	30	3	s+; UAS-Yippee_30	s+; UAS-Yippee_30_3
s+; UAS-Yippee	73	30	4	s+; UAS-Yippee_30	s+; UAS-Yippee_30_4
s+; UAS-Yippee	71	30	5	s+; UAS-Yippee_30	s+; UAS-Yippee_30_5
s+; UAS-Yippee	60	30	6	s+; UAS-Yippee_30	s+; UAS-Yippee_30_6
s+; UAS-Yippee	67	30	7	s+; UAS-Yippee_30	s+; UAS-Yippee_30_7
s+; UAS-Yippee	76	30	8	s+; UAS-Yippee_30	s+; UAS-Yippee_30_8
s+; UAS-Yippee	77	30	9	s+; UAS-Yippee_30	s+; UAS-Yippee_30_9
s+; UAS-Yippee	68	30	10	s+; UAS-Yippee_30	s+; UAS-Yippee_30_10
s+; UAS-Yippee	73	30	11	s+; UAS-Yippee_30	s+; UAS-Yippee_30_11
s+; UAS-Yippee	70	30	12	s+; UAS-Yippee_30	s+; UAS-Yippee_30_12
s+; UAS-Yippee	75	30	13	s+; UAS-Yippee_30	s+; UAS-Yippee_30_13
s+; UAS-Yippee	82	30	14	s+; UAS-Yippee_30	s+; UAS-Yippee_30_14
s+; UAS-Yippee	88	30	15	s+; UAS-Yippee_30	s+; UAS-Yippee_30_15
s+; UAS-Yippee	80	30	16	s+; UAS-Yippee_30	s+; UAS-Yippee_30_16
s+; UAS-Yippee	73	30	17	s+; UAS-Yippee_30	s+; UAS-Yippee_30_17
s+; UAS-Yippee	87	30	18	s+; UAS-Yippee_30	s+; UAS-Yippee_30_18
s+; UAS-Yippee	69	30	19	s+; UAS-Yippee_30	s+; UAS-Yippee_30_19
s+; UAS-Yippee	81	30	20	s+; UAS-Yippee_30	s+; UAS-Yippee_30_20
s+; UAS-Yippee	78	31	1	s+; UAS-Yippee_31	s+; UAS-Yippee_31_1
s+; UAS-Yippee	74	31	2	s+; UAS-Yippee_31	s+; UAS-Yippee_31_2
s+; UAS-Yippee	85	31	3	s+; UAS-Yippee_31	s+; UAS-Yippee_31_3
s+; UAS-Yippee	84	31	4	s+; UAS-Yippee_31	s+; UAS-Yippee_31_4
s+; UAS-Yippee	82	31	5	s+; UAS-Yippee_31	s+; UAS-Yippee_31_5
s+; UAS-Yippee	93	31	6	s+; UAS-Yippee_31	s+; UAS-Yippee_31_6
s+; UAS-Yippee	79	31	7	s+; UAS-Yippee_31	s+; UAS-Yippee_31_7
s+; UAS-Yippee	96	31	8	s+; UAS-Yippee_31	s+; UAS-Yippee_31_8
s+; UAS-Yippee	92	31	9	s+; UAS-Yippee_31	s+; UAS-Yippee_31_9
s+; UAS-Yippee	86	31	10	s+; UAS-Yippee_31	s+; UAS-Yippee_31_10
s+; UAS-Yippee	79	31	11	s+; UAS-Yippee_31	s+; UAS-Yippee_31_11
s+; UAS-Yippee	81	31	12	s+; UAS-Yippee_31	s+; UAS-Yippee_31_12
s+; UAS-Yippee	73	31	13	s+; UAS-Yippee_31	s+; UAS-Yippee_31_13
s+; UAS-Yippee	78	31	14	s+; UAS-Yippee_31	s+; UAS-Yippee_31_14
s+; UAS-Yippee	83	31	15	s+; UAS-Yippee_31	s+; UAS-Yippee_31_15
s+; UAS-Yippee	88	31	16	s+; UAS-Yippee_31	s+; UAS-Yippee_31_16
s+; UAS-Yippee	85	31	17	s+; UAS-Yippee_31	s+; UAS-Yippee_31_17
s+; UAS-Yippee	83	31	18	s+; UAS-Yippee_31	s+; UAS-Yippee_31_18
s+; UAS-Yippee	79	31	19	s+; UAS-Yippee_31	s+; UAS-Yippee_31_19
s+; UAS-Yippee	83	31	20	s+; UAS-Yippee_31	s+; UAS-Yippee_31_20
s+; UAS-Yippee	84	32	1	s+; UAS-Yippee_32	s+; UAS-Yippee_32_1
s+; UAS-Yippee	98	32	2	s+; UAS-Yippee_32	s+; UAS-Yippee_32_2
s+; UAS-Yippee	85	32	3	s+; UAS-Yippee_32	s+; UAS-Yippee_32_3
s+; UAS-Yippee	96	32	4	s+; UAS-Yippee_32	s+; UAS-Yippee_32_4
s+; UAS-Yippee	81	32	5	s+; UAS-Yippee_32	s+; UAS-Yippee_32_5
s+; UAS-Yippee	83	32	6	s+; UAS-Yippee_32	s+; UAS-Yippee_32_6
s+; UAS-Yippee	93	32	7	s+; UAS-Yippee_32	s+; UAS-Yippee_32_7
s+; UAS-Yippee	99	32	8	s+; UAS-Yippee_32	s+; UAS-Yippee_32_8
s+; UAS-Yippee	85	32	9	s+; UAS-Yippee_32	s+; UAS-Yippee_32_9
s+; UAS-Yippee	108	32	10	s+; UAS-Yippee_32	s+; UAS-Yippee_32_10
s+; UAS-Yippee	99	32	11	s+; UAS-Yippee_32	s+; UAS-Yippee_32_11
s+; UAS-Yippee	90	32	12	s+; UAS-Yippee_32	s+; UAS-Yippee_32_12
s+; UAS-Yippee	72	32	13	s+; UAS-Yippee_32	s+; UAS-Yippee_32_13
s+; UAS-Yippee	86	32	14	s+; UAS-Yippee_32	s+; UAS-Yippee_32_14
s+; UAS-Yippee	70	32	15	s+; UAS-Yippee_32	s+; UAS-Yippee_32_15
s+; UAS-Yippee	80	32	16	s+; UAS-Yippee_32	s+; UAS-Yippee_32_16
s+; UAS-Yippee	86	32	17	s+; UAS-Yippee_32	s+; UAS-Yippee_32_17
s+; UAS-Yippee	87	32	18	s+; UAS-Yippee_32	s+; UAS-Yippee_32_18
s+; UAS-Yippee	95	32	19	s+; UAS-Yippee_32	s+; UAS-Yippee_32_19
s+; UAS-Yippee	98	32	20	s+; UAS-Yippee_32	s+; UAS-Yippee_32_20
s+; UAS-Yippee	78	33	1	s+; UAS-Yippee_33	s+; UAS-Yippee_33_1
s+; UAS-Yippee	63	33	2	s+; UAS-Yippee_33	s+; UAS-Yippee_33_2
s+; UAS-Yippee	74	33	3	s+; UAS-Yippee_33	s+; UAS-Yippee_33_3
s+; UAS-Yippee	73	33	4	s+; UAS-Yippee_33	s+; UAS-Yippee_33_4
s+; UAS-Yippee	66	33	5	s+; UAS-Yippee_33	s+; UAS-Yippee_33_5
s+; UAS-Yippee	64	33	6	s+; UAS-Yippee_33	s+; UAS-Yippee_33_6
s+; UAS-Yippee	71	33	7	s+; UAS-Yippee_33	s+; UAS-Yippee_33_7
s+; UAS-Yippee	63	33	8	s+; UAS-Yippee_33	s+; UAS-Yippee_33_8
s+; UAS-Yippee	74	33	9	s+; UAS-Yippee_33	s+; UAS-Yippee_33_9
s+; UAS-Yippee	71	33	10	s+; UAS-Yippee_33	s+; UAS-Yippee_33_10
s+; UAS-Yippee	67	33	11	s+; UAS-Yippee_33	s+; UAS-Yippee_33_11
s+; UAS-Yippee	67	33	12	s+; UAS-Yippee_33	s+; UAS-Yippee_33_12
s+; UAS-Yippee	66	33	13	s+; UAS-Yippee_33	s+; UAS-Yippee_33_13
s+; UAS-Yippee	85	33	14	s+; UAS-Yippee_33	s+; UAS-Yippee_33_14
s+; UAS-Yippee	74	33	15	s+; UAS-Yippee_33	s+; UAS-Yippee_33_15
[truncated: 5,345 more rows]

## Sheet: Expt 6-Figure 5I data
Genotype	Gray value	fly	pixel	flyid	pixelid
[truncated: 1,800 more rows]

[truncated: 1 more sheets: Tukey's HSD p values, all expts]
