# Supplementary material
Source: publisher figshare collection journal article supplement (https://gsajournals.figshare.com/articles/dataset/_/19059725)
Supplement: Supplementary file 2 [file 2]

# Supplementary Materials and Methods

| CONTENTS                                                                                      | Page      |
|-----------------------------------------------------------------------------------------------|-----------|
| <b>I. Fly stocks</b>                                                                          | <b>2</b>  |
| <i>Table S1. Drosophila stock sources, descriptions, and references</i>                       | <b>2</b>  |
| <b>II. Experimental crosses</b>                                                               | <b>6</b>  |
| <b>III. Construction of CRISPR mutants</b>                                                    | <b>9</b>  |
| <i>Figure S1. CRISPaint marker construct used to create the Yippee<sup>Chi-A</sup> allele</i> | <b>11</b> |
| <i>Figure S2. HDR-CRISPR vector and insert plasmids</i>                                       | <b>15</b> |
| <i>Figure S3. Homology-arm marker construct used to create the Yippee<sup>Δ1</sup> allele</i> | <b>18</b> |
| <b>IV. Determination of structure of new mutant alleles</b>                                   | <b>20</b> |
| <i>Figure S4. Inferred structure of new mutant alleles</i>                                    | <b>20</b> |
| <b>V. Photography equipment</b>                                                               | <b>23</b> |
| <b>VI. Preparation of flies for photography</b>                                               | <b>24</b> |
| <b>VII. Photography for assembly of figure images</b>                                         | <b>25</b> |
| <b>VIII. Photography for quantifying body luminance</b>                                       | <b>26</b> |
| <b>IX. Collection and analysis of body luminance data</b>                                     | <b>27</b> |
| <i>Figure S5. Area of the dorsal thorax where cuticle gray values were measured</i>           | <b>27</b> |
| <b>X. References</b>                                                                          | <b>28</b> |

## I. Fly stocks

The following table lists and describes the fly stocks that were used in this study. Stocks are grouped according to the part of the investigation that they were involved in (**Experiments 1-6**). **(i)-(v)** refer to clarifying footnotes immediately below the table.

**TABLE S1. *Drosophila* stock sources, descriptions, and references**

| Genotype                                                                       | Source <b>(i)</b> and Description                                                                                                                                                         | Refs. <b>(ii)</b> |
|--------------------------------------------------------------------------------|-------------------------------------------------------------------------------------------------------------------------------------------------------------------------------------------|-------------------|
| <b>Experiment 1: Recombination mapping</b>                                     |                                                                                                                                                                                           |                   |
| <i>s<sup>1</sup></i>                                                           | BL 4173. Original <i>sable<sup>1</sup></i> stock. Used for initial mapping experiments.                                                                                                   | 1, 2              |
| <i>w wy<sup>2</sup> g<sup>2</sup> f</i>                                        | BL 84699. For three-point mapping of <i>sable<sup>1</sup></i> relative to mapped loci.                                                                                                    | 3                 |
| <b>Experiment 2: Deficiency (Df) and duplication (Dp) mapping <b>(iii)</b></b> |                                                                                                                                                                                           |                   |
| <i>w<sup>1118</sup></i>                                                        | BL 6326. The “s <sup>+</sup> ” wild-type control stock used for our photos and quantitative data.                                                                                         | 4                 |
| <i>w<sup>1118</sup> s<sup>1</sup></i>                                          | The “s <sup>1</sup> ” stock used for our photos and quantitative data.<br>Made by recombining <i>s<sup>1</sup></i> from BL 4173 onto the <i>w<sup>1118</sup></i> chromosome from BL 6326. |                   |
| <i>w<sup>1118</sup>, Df(1)Exel6245/FM7C Bar</i>                                | BL 7718.                                                                                                                                                                                  | 5                 |
| <i>w<sup>1118</sup>; Dp(1;3)DC268</i>                                          | BL 30385.                                                                                                                                                                                 | 6                 |
| <i>w<sup>1118</sup>; Dp(1;3)DC269</i>                                          | BL 30386.                                                                                                                                                                                 | 6                 |

TABLE S1 (cont.)

| Genotype                                                                    | Source (i) and Description                                                                                                                                                                                                       | Refs. (ii) |
|-----------------------------------------------------------------------------|----------------------------------------------------------------------------------------------------------------------------------------------------------------------------------------------------------------------------------|------------|
| <b>Experiment 3: Initial screening of <i>sable</i> candidate genes (iv)</b> |                                                                                                                                                                                                                                  |            |
| <i>w<sup>1118</sup>; Act5C-GAL4/TM6C Sb Tb</i>                              | <i>Act5C-GAL4</i> construct originally from BL 3954, but crossed into a <i>w<sup>1118</sup></i> background and balanced over <i>TM6C Sb Tb</i> . Ubiquitously expresses GAL4. Also used for experimental crosses in (4) and (5). | 7, 8       |
| <i>w; pnr-GAL4/TM6B Tb</i>                                                  | BL 58788 (v). Expresses GAL4 in dorsal ectoderm. Also used for experimental crosses in (4).                                                                                                                                      | 9, 10      |
| <i>w<sup>1118</sup>; Yippee<sup>GD17271</sup></i>                           | V 46977. Our primary UAS- <i>Yippee</i> RNAi stock. Also used for experimental crosses in (4).                                                                                                                                   | 11         |
| <i>w<sup>1118</sup>; Yippee<sup>GD8633</sup></i>                            | V 39899. UAS- <i>Yippee</i> RNAi stock. (No longer available from VDRC.)                                                                                                                                                         | 11         |
| <i>w<sup>1118</sup>; CG1673<sup>GD9192</sup></i>                            | V 25204. UAS- <i>CG1673</i> RNAi stock.                                                                                                                                                                                          | 11         |
| <i>y<sup>1</sup> w<sup>67c23</sup> CG1673<sup>EY20842</sup></i>             | BL 23109. Transgene insertion in 5'-UTR of <i>CG1673</i> .                                                                                                                                                                       | 12, 13     |
| <i>w<sup>1118</sup> CG1673<sup>EP1023</sup></i>                             | BL 10115. Transgene insertion in 5'-UTR of <i>CG1673</i> .                                                                                                                                                                       | 12, 14     |
| <b>Experiment 4: RNAi of <i>Yippee</i></b>                                  |                                                                                                                                                                                                                                  |            |
| <i>elav<sup>C155</sup></i>                                                  | BL 458. Expresses GAL4 in post-mitotic neurons.                                                                                                                                                                                  | 15, 16     |
| <i>w; fkh-GAL4</i>                                                          | BL 78060. Expresses GAL4 in the salivary glands.                                                                                                                                                                                 | 17         |
| <i>y<sup>1</sup> w<sup>1</sup>; nub-GAL4</i>                                | <i>nub-GAL4</i> construct originally from BL 25754, but then crossed into a <i>y<sup>1</sup> w<sup>1</sup></i> background (BL 1495). Expresses GAL4 in the wing imaginal disk.                                                   | 18         |
| <i>y<sup>1</sup> w; r4-GAL4</i>                                             | BL 33832. Expresses GAL4 in the fat body.                                                                                                                                                                                        | 19         |

TABLE S1 (cont.)

| Genotype                                                                                         | Source (i) and Description                                                                                                                                                                                                                                                                                | Refs. (ii) |
|--------------------------------------------------------------------------------------------------|-----------------------------------------------------------------------------------------------------------------------------------------------------------------------------------------------------------------------------------------------------------------------------------------------------------|------------|
| <b>Experiment 5: Misexpression and rescue</b>                                                    |                                                                                                                                                                                                                                                                                                           |            |
| <i>y w</i> ; UAS- <i>Yippee</i>                                                                  | F 003701. UAS- <i>Yippee</i> provides GAL4-inducible expression of the wild-type <i>Yippee</i> -RA isoform with a C-terminal 3xHA tag.                                                                                                                                                                    | 20         |
| <i>w<sup>1118</sup> s<sup>1</sup></i> ; UAS- <i>Yippee</i>                                       | UAS- <i>Yippee</i> construct from F 003701 crossed into our <i>w<sup>1118</sup> s<sup>1</sup></i> background.                                                                                                                                                                                             |            |
| <b>Experiment 6: New <i>Yippee</i> alleles, <i>sable</i>/<i>Yippee</i> complementation tests</b> |                                                                                                                                                                                                                                                                                                           |            |
| <i>w<sup>+</sup> Yippee<sup>Chi-A</sup>/FM7H Bar</i>                                             | The <i>Yippee<sup>Chi-A</sup></i> allele has a CRISPaint-induced <i>mini-w<sup>+</sup></i> insertion immediately 5' of the <i>Yippee</i> transcription start site. Constructed as described in this document (III. Construction of CRISPR mutants). Deposited at the Bloomington Stock Center (BL 93858). | This study |
| <i>w<sup>+</sup> Yippee<sup>Δ1</sup>/FM7C Bar</i>                                                | <i>Yippee<sup>Δ1</sup></i> is a molecular null allele, an HDR-CRISPR deletion of the entire <i>Yippee</i> coding sequence. Constructed as described in this document (III. Construction of CRISPR mutants). Deposited at the Bloomington Stock Center (BL 93859).                                         | This study |

(i) Stock providers: Bloomington *Drosophila* Stock Center (BL), Vienna *Drosophila* Resource Center

(V), FlyORF (F). Number immediately following a stock center abbreviation is the stock ID.

(ii) Refs. (references) shown in this column: 1. Morgan and Bridges (1916), 2. Lindsley and Zimm (1992), 3. Dean *et al.* (2020), 4. Hoskins *et al.* (2001), 5. Parks *et al.* (2004), 6. Venken *et al.* (2010), 7. Ito *et al.* (1997), 8. Wang *et al.* (2007), 9. Heitzler *et al.* (1996), 10. Calleja *et al.* (2000), 11. Dietzl *et al.* (2007), 12. Bellen *et al.* (2004), 13. Bellen *et al.* (2011), 14. Rorth (1996),

15. Lin and Goodman (1994), 16. Agrawal *et al.* (2005), 17. Henderson and Andrew (2000), 18. Azpiazu and Morata (2000), 19. Lee and Park (2004), 20. Bischof *et al.* (2013).

**(iii) Experiment 2** of this table lists, of all the aberrations that we tested, a deficiency and two duplications that appeared to overlap *sable* (explained in Results). All other deficiencies and duplications that we tested did *not* appear to overlap *sable*; these included: Df(1)ED7170 (BL 8898), Df(1)ED7217 (BL 8952), Df(1)ED7165 (BL 9058), Df(1)BSC713 (BL 26565), Dp(1;3)DC263 (BL 30380), Dp(1;3)DC264 (BL 30381), Dp(1;3)DC265 (BL 30382), Dp(1;3)DC266 (BL30383), Dp(1;3)DC267 (BL 30384), Dp(1;3)DC270 (BL 30387), Dp(1;3)DC272 (BL 30389).

**(iv) Experiment 3** of this table only lists UAS-RNAi lines for the two strongest candidate *sable* genes (*Yippee* and *CG1673*). Other UAS-RNAi lines tested: BL 66975 (*CG1662*), BL 55235 (*Tim9a*), and BL 36717 (*GstT4*).

**(v)** The *pnr*-GAL4 chromosome of BL 58788 also carries *Mo<sup>esqh.GFP(S65T)</sup>*, a transgene that expresses an actin-binding motif of Moesin tagged with GFP. *Mo<sup>esqh.GFP(S65T)</sup>* does not appear to affect development (Kiehart *et al.*, 2000), and we saw no evidence that it significantly affects body color (Figure 3).

## II. Experimental crosses

In the preceding section, Table S1 listed this study's fly stocks, subdividing them into **Experiments 1-6**. Here, using the same groupings, we describe how parental stocks were crossed and which progeny were assessed. Most experimental crosses were incubated at 19-21°C (Experiments 1, 2, and 6; *CG1673* crosses in Experiment 3), but crosses involving GAL4-UAS (Experiments 4, 5; GAL4-UAS crosses in Experiment 3) were incubated at 25°C. Cross-referencing this section with Table S1 and with manuscript figure captions should provide the information needed to reconstruct our experimental crosses, but further details can be made available upon request.

### Experiment 1: Recombination mapping

- (*w wy<sup>2</sup> g<sup>2</sup> f* females) x (*s<sup>1</sup>* males), F1 siblings were mated, and F2 males were scored.

### Experiment 2: Deficiency (Df) and duplication (Dp) mapping

- Deficiency mapping: (*Df(1)/FM7 Bar* females) x (*s<sup>1</sup>* males), then F1 *s<sup>1</sup>/Df(1)* females were scored.
- Duplication mapping: (*s<sup>1</sup>* females) x (*Dp(1;3)* males), then F1 *s<sup>1</sup>/Y; Dp(1;3)/+* males were scored.

### Experiment 3: Initial screening of *sable* candidate genes

- RNAi screen: Deficiency and duplication mapping led to a short list of potential *sable* genes (Figure 2M). UAS-RNAi lines representing most of these candidates were crossed to *pnr*-GAL4 and in some cases *Act5C*-GAL4 flies, and F1 GAL4 > UAS-RNAi flies were examined. Results from this initial screen were cross-referenced with

findings from a previous RNAi-based body color/bristle screen (Mummery-Widmer *et al.* 2009; IMBA Bristle Screen database <https://bristlescreen.imba.oeaw.ac.at>).

- CG1673 complementation tests: The *CG1673<sup>EY20842</sup>* and *CG1673<sup>EP1023</sup>* stocks were crossed to *s<sup>1</sup>* as well as to Df(1)Exel6245/FM7C *Bar*, then transheterozygous (*CG1673/s<sup>1</sup>*) and hemizygous (*CG1673/Df*) F1 females were examined.

#### Experiment 4: RNAi of *Yippee*

- Experimental groups: *w<sup>1118</sup>*; *Yippee<sup>GD17271</sup>* females were crossed to males from each of the GAL4 lines listed in Table S1 > Experiments 3 and 4, then F1s carrying a GAL4 and an RNAi construct were scored (“*Act5C* > RNAi”, “*pnr* > RNAi”, “*nub* > RNAi”, *etc.* in Figure 3). (In one exception to this cross scheme, *elav*-GAL4 females were mated to *w<sup>1118</sup>*; *Yippee<sup>GD17271</sup>* males because the C155 *elav*-GAL4 construct is X-linked, and we wished the GAL4 construct to be inherited by both F1 sexes.)
- GAL4-only controls: *w<sup>1118</sup> s<sup>+</sup>* females were mated to males from each GAL4 line, then F1 GAL4/+ heterozygotes were scored (“*Act5C*”, “*pnr*”, and “*nub*”, *etc.* in Figure 3). (In one exception, *elav*-GAL4 females were mated to *w<sup>1118</sup> s<sup>+</sup>* males.)
- RNAi-only controls: (*w<sup>1118</sup>*; *Yippee<sup>GD17271</sup>* females) x (*w<sup>1118</sup> s<sup>+</sup>* males), then F1 *w<sup>1118</sup>*; *Yippee<sup>GD17271</sup>*/+ heterozygotes were scored (“RNAi” in Figure 3).

#### Experiment 5: Misexpression and rescue

- Misexpression, experimental group: (*w<sup>1118</sup> s<sup>+</sup>*; *Act5C*-GAL4/TM6C *Sb Tb* females) x (*y w*; UAS-*Yippee* males), then F1 *w<sup>1118</sup> s<sup>+</sup>/Y*; *Act5C*-GAL4/UAS-*Yippee* males were scored (“*s<sup>+</sup>*; *Act5C* > UAS-*Yippee*”, Figure 4).
- Misexpression, GAL4-only controls: (*w<sup>1118</sup> s<sup>+</sup>*; *Act5C*-GAL4/TM6C *Sb Tb* females) x (*w<sup>1118</sup> s<sup>+</sup>* males), then F1 *w<sup>1118</sup> s<sup>+</sup>/Y*; *Act5C*-GAL4/+ males were scored (“*s<sup>+</sup>*; *Act5C*”, Figure 4).

- Misexpression, UAS-Yippee-only controls: ( $w^{1118} s^+$  females) x ( $y w$ ; UAS-Yippee males), then F1  $w^{1118} s^+/Y$ ; +/UAS-Yippee males were scored (" $s^+$ ; UAS-Yippee", Figure 4).
- Rescue, experimental group: ( $w^{1118} s^1$ ; UAS-Yippee females) x ( $w^{1118}$ ; Act5C-GAL4/TM6C *Sb Tb* males), then F1  $w^{1118} s^1/Y$ ; Act5C-GAL4/UAS-Yippee males were scored (" $s^1$ ; Act5C > UAS-Yippee", Figure 4).
- Rescue, GAL4-only controls: ( $w^{1118} s^1$  females) x ( $w^{1118}$ ; Act5C-GAL4/TM6C *Sb Tb* males), then F1  $w^{1118} s^1/Y$ ; Act5C-GAL4/+ males were scored (" $s^1$ ; Act5C", Figure 4).
- Rescue, UAS-Yippee-only controls: ( $w^{1118} s^1$  females) x ( $y w$ ; UAS-Yippee males), then F1  $w^{1118} s^1/Y$ ; +/UAS-Yippee males were scored (" $s^1$ ; UAS-Yippee", Figure 4).

#### **Experiment 6: New Yippee alleles, *sable*/Yippee complementation tests**

- New alleles:  $w^* Yippee^{Chi-A}/Y$  adult males and  $w^* Yippee^{A1}/Y$  pharate adult males were obtained directly from their balanced stocks (Table S1 > Experiment 6).
- Complementation tests (experimental groups): ( $w^* Yippee/FM7 Bar$  females) x ( $w^{1118} s^1$  males), then F1  $w^{1118} s^1/w^* Yippee$  females were scored (" $s^1/Yippee$ ", Figure 5).
- Complementation tests (controls): ( $w^{1118} s^+$  females) x ( $w^{1118} s^1$  males), then F1  $w^{1118} s^1/w^{1118} s^+$  females were scored (" $s^1/s^+$ ", Figure 5). In a separate set of crosses, ( $w^* Yippee/FM7 Bar$  females) x ( $w^{1118} s^+$  males), then F1  $w^{1118} s^+/w^* Yippee$  females were scored (" $s^+/Yippee$ ", Figure 5).



### III. Construction of CRISPR mutants

Plasmid constructs for repair of CRISPR were assembled using MoClo, a modular hierarchical assembly design protocol that uses the Golden Gate reaction to turn standardized parts into complex constructs (Weber *et al.* 2011). We used the connectors and backbones from the MoClo Yeast Toolkit (Lee *et al.* 2015) ('ytk' parts, sourced from addgene.org) and designed *Drosophila* parts, which we refer to with the prefix 'dmo', short for *Drosophila* modular cloning toolkit. Dmo parts are available from the authors on request. We used the Yeast Toolkit's constrained MoClo design rules documented in Lee *et al.* 2015, and we encourage readers interested in the assembly strategy to consult that publication's supplementary text. We switched kanamycin resistance to Level 1 and ampicillin resistance to level 2, and used isoschizomer enzyme Esp3I instead of BsmBI for some reactions. To facilitate reaction setup, we found it helpful to adjust the concentration of each part to 20 nM. A typical 10 µl reaction consisted of 1 µl of T7 ligase, 1 µl of restriction enzyme, either 2x T7 ligase buffer or 10x T4 ligase buffer depending on available reaction volume, 0.5 µl of vector, and 1 µl of each insert part. All enzymes were from New England Biolabs. Reaction cycles were typically 30x(37°C for 2 min, X°C for 5 min), 60°C for 10 min, 80°C for 10 min, hold at 10°C, where X= 16°C for BsaI and Esp3I and 42 °C for BsmBI. To incorporate the GFP dropout, we used the end-ligation cycle 30x(37°C for 2 min, 16°C for 5 min), 16°C for 10 min, hold at 16°C.

MoClo-compatible parts need to be free of BsaI and Esp3I sites, which, as 6-mers, occur frequently in sequences on the scale of *Drosophila* genes. The yeast toolkit specifications also remove NotI sites. We mutated such sites by synonymous

substitutions or permuting base pairs, e.g., CGTCTC to CTGCTC, with PCR primers. PCR fragments were then Golden Gate assembled into MoClo vectors. For example, we built MoClo-compatible dmo-*mini-w* marker genes from the *mini-w* template in the pS3aG vector via PCR mutagenesis and Golden Gate assembly into pEntry. dmo-*mini-w* preserves the intronic XbaI-HindIII deletion characteristic of  $w^{+mC}$ , but it ends at the annotated transcription terminus, thus removing the 636bp noncoding sequence that flanks the 3' end of *w* and includes the *wari* insulator (Chetverina *et al.* 2008).

We developed two types of CRISPR experiments to modify the *Yippee* locus, one using CRISPaint (Bosch *et al.* 2020) and one using homology directed repair (Gratz *et al.* 2014). The CRISPaint strategy (used to make allele *Yippee<sup>Chi-A</sup>*) attempts to incorporate a marker construct at a CRISPR cut that is repaired by nonhomologous end joining. Thus, the marker construct is designed to be linearized by a Cas9 cut and does not carry homology arms. A diagram of this CRISPaintL construct is shown in Figure S1.

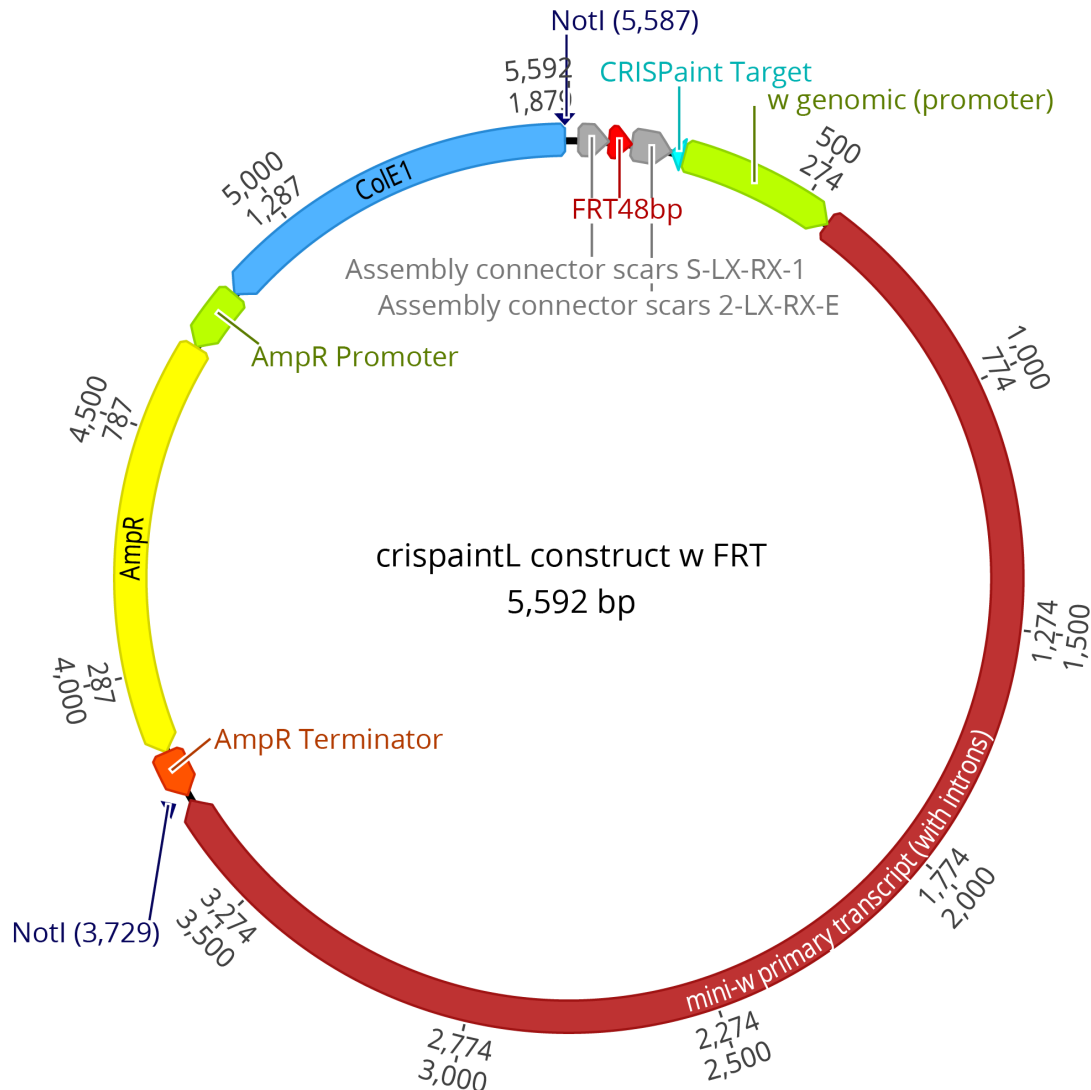

**Figure S1.** CRISPaint marker construct used to create the *Yippee<sup>Chi-A</sup>* allele. This includes the dmo-*mini-w* marker, an AmpRCole1 plasmid backbone, along with some empty MoClo connector slots and a 48bp FRT site (Turan and Bode 2011) that we intended for use in another experiment. The structure is ConS-Con1-FRT48-Con2-ConE-CRISPaint\_target - dmo\_mini\_w-AmpRCole1. Image constructed using Geneious Prime.

The CRISPaintL construct was assembled using MoClo as follows. This Level 2 plasmid was built from four Level 1 parts (t# refers to the part type): a) vector (t1)ConLS'-(t234r)GFPdropout-(t5)ConRE'-(t6)-dmo-CRISPaint\_targetL-(t7)dmo-mini-w-(t8)AmpRCole1, b) dmo-conS1(empty), c) Con1-(t234)dmo-FRT48-Con2,

and d) dmo-con2E(empty). The 'dmo' parts are newly engineered and we report their sequences here.

- dmo-ConS1(empty) has, along with the Level 1 KanRCole1 backbone, insert sequence  
GCGGCCGCCCCTGAATTTCGCATCTAGATGGTAGAGCCACAAACAGCCGGTACAAG  
CAACGATCTCCAGGACCATCTGAATCATGCGCGGATGACACGAACTCACGACGGC  
GATCACAGACATTAACCCACAGTACAGACACTGCGACAACGTGGCAATTCGTTCG  
AATACCGTCTCACTGAACTGGCCGATAATTGCAGACGAACGGCTGCCAATGAGAC  
GTACAGCGGCCGC
- dmo-Con2E(empty) has, along with the Level 1 KanRCole1 backbone, insert sequence  
GCGGCCGCCCCTGAATTTCGCATCTAGAATAAATCGCAGCCAAGTGAGTGAATAGA  
TGACGCACCACGGTCAGACACGGCCACATCGTATCTCACAGGAGCAAGCGCGATA  
GGAGCACTCACACATAGTACGGTGATCCGCTGACTCCTTTGCCCAAATAAGACGT  
GAGCCCGTCTCAGATGCACACACTGGCTTAAGATGACAACGGCTGAGCATGAGAC  
GTACAGCGGCCGC
- (t6) dmo-CRISPaint-targetL has, along with the Level 0 CamRCole1 backbone, insert sequence  
AGTCGGTCTCATACACCCCCGCTTTTTTGGGTACTGGCCCGAGTTGAGACCAG
- (t234) dmo-FRT48 has, along with the Level 0 CamRCole1 backbone, insert sequence  
CTGGTCTCACAGCGAAGTTCCTATACTTTCTAGAGAATAGGAACTTCGGAATAGG  
AACTTCCGTTTGAGACCGACT
- (t7) dmo-miniW has, along with the Level 0 CamRCole1 backbone, insert sequence  
AGTCGGTCTCAGAGTCTAGTATGTATGTAAGTTAATAAAACCCTTTTTTGCGGA  
AAGTAGATAAAAAAACATTTTTTTTTTTTACTGCACTGGATATCATTGAACTT  
ATCTGATCAGTTTTAAATTTACTTCGATCCAAGGGTATTTGATGTACCAGGTTCT  
TTCGATTACCTCTCACTCAAAATGACATTCCTCAAGTCAGCGCTGTTTGCCT  
CCTTCTCTGTCCACAGAAATATCGCCTGCTCTTTCGCCGCTGCGTCCGCTATCTCT  
TTCGCCACCGTTTGTAGCGTTACGTAGCGTCAATGTCCGCCTTCAGTTGCATTTT  
GTCAGCGGTTTTCGTGACGAAGCTCCAAGCGGTTTACGCCATCAATTAACACAAA  
GTGCTGTGCCAAAACCTCCTCTCGCTTCTTATTTTTGTTTGTGTTTGTGAGTGATTG  
GGGTGGTGATTGGTTTTGGGTGGGTAAGCAGGGGAAAGTGTAAGAAATCCCGGC  
AATGGGCCAAGAGGATCAGGAGCTATTAATTCGCGGAGGCAGCAACACCCATC  
TGCCGAGCATCTGAACAATGTGAGTAGTACATGTGCATACATCTTAAGTTCACTT  
GATCTATAGGAACTGCGATTGCAACATCAAATTGTCTGCGGCGTGAGAACTGCG  
ACCCACAAAAATCCCAAACCGCAATTGCACAAACAAATAGTGACACGAAACAGA  
TTATTCTGGTAGCTGTTCTCGCTATATAAGACAATTTTTGAGATCATATCATGAT  
CAAGACATCTAAAGGCATTCATTTTCGACTATATTCTTTTTTACAAAAAATATA

ACAACCAGATATTTTAAGCTGATCCTAGATGCACAAAAAATAAATAAAAGTATA  
 AACCTACTTCGTAGGATACTTCGGGGTACTTTTTGTTTCGGGGTTAGATGAGCATA  
 ACGCTTGATGTTGATATTTGAGATCCCCATCATTCGAGGGTGACAGCGGAGCGG  
 CTTTCGAGAGCTGCATTAACCAGGGCTTCGGGCAGGCCAAAACTACGGCACGCT  
 CCGGCCACCCAGTCCGCCGAGGACTCCGGTTCAGGGAGCGGCCAACTAGCCGAG  
 AACCTCACCTATGCCTGGCACAATATGGACATCTTTGGGGCGGTCAATCAGCCGG  
 GCTCCGGATGGCGGCAGCTGGTCAACCGGACACGCGGACTATTCTGCAACGAGCG  
 ACACATACCGGCGCCCAGGAAACATTTGCTCAAGAACGGTGAGTTTCTATTTCGA  
 GTCGGCTGATCTGTGTGAAATCTTAATAAAGGGTCCAATTACCAATTTGAAACT  
 CAGTTTGCGGCGTGGCCTATCCGGGCGAACTTTTGGCCGTGATGGGCAGTTCCGG  
 TGCCGGAAAGACGACCCTGCTGAATGCCCTTGCCCTTCGATCGCCGAGGGCATC  
 CAAGTATCGCCATCCGGGATGCGACTGCTCAATGGCCAACCTGTGGACGCCAAGG  
 AGATGCAGGCCAGGTGCGCCTATGTCCAGCAGGATGACCTCTTTATCGGCTCCCT  
 AACGGCCAGGGAACACCTGATTTTCCAAGCCATGGTGCGGATGCCACGACATCTG  
 ACCTATCGGCAGCGAGTGGCCCGCGTGGATCAGGTGATCCAGGAGCTTTCGCTCA  
 GCAAATGTCAGCACACGATCATCGGTGTGCCCGGCAGGGTGAAAGGTCTGTCCGG  
 CGGAGAAAGGAAGCGTCTGGCATTTCGCCTCCGAGGCTCTAACCGATCCGCCGCTT  
 CTGATCTGCGATGAGCCCACCTCCGGACTGGACTCCTTTACCGCCCACAGCGTCG  
 TCCAGGTGCTGAAGAAGCTGTGCGAGAAGGGCAAGACCGTCATCCTGACCATTCA  
 TCAGCCGTCTTCCGAGCTGTTTGAGCTCTTTGACAAGATCCTTCTGATGGCCGAG  
 GGCAGGGTAGCTTCTTGGGCACTCCCAGCGAAGCCGTCGACTTCTTTTCCTAGT  
 GAGTTCGATGTGTTTATTAAGGGTATCTAGTATTACATAACATCTCAACTCCTAT  
 CCAGCGTGGGTGCCCAGTGTCTACCAACTACAATCCGGCGGACTTTTACGTACA  
 GGTGTTGGCCGTTGTGCCCGGACGGGAGATCGAGTCCCGTGATCGGATCGCCAAG  
 ATATGCGACAATTTTGCCATTAGCAAAGTAGCCCGGGATATGGAGCAGTTGTTG  
 GCCACCAAAAATCTGGAGAAGCCACTGGAGCAGCCGGAGAATGGGTACACCTACA  
 AGGCCACCTGGTTCATGCAGTTCCGGGCGGTCTGTGGCGATCCTGGCTGTCGGT  
 GCTCAAGGAACCACTCCTCGTAAAAGTGCGACTTATTCAGACAACGGTGAGTGGT  
 TCCAGTGGAACAAATGATATAACGCTTACAATTCTTGGAACAAATTCGCTAG  
 ATTTTAGATAGAATTGCCTGATTCCACACCCTTCTTAGTTTTTTTCAATGAGATG  
 TATAGTTTATAGTTTTTGCAGAAGATAAATAAATTTTCATTTAACTCGCGAATATT  
 AATGAGATGCGAGTAACATTTTAATTTGCAGATGGTTGCCATCTTGATTGGCCTC  
 ATCTTTTTTGGGCCAACAACTCACGCAAGTGGGTGTGATGAATATCAACGGAGCCA  
 TCTTCTCTTCTGACCAACATGACCTTTCAAACGTCCTTTGCCACGATAAATGT  
 AAGTCATGTTTAGAATACATTTGCATTTCAATAATTTACTAACTTTCTAATGAA  
 TCGATTGATTTAGGTGTTACCTCAGAGCTGCCAGTTTTTATGAGGGAGGCCCG  
 AAGTCGACTTTATCGCTGTGACACATACTTTCTGGGCAAAACGATTGCCGAATTG  
 CCGCTTTTTTCTCACAGTGCCACTGGTCTTACGGCGATTGCCTATCCGATGATCG  
 GACTGCGGGCCGGAGTGCTGCACTTCTTCAACTGCCTGGCGCTGGTCACTCTGGT  
 GGCCAATGTGTCAACGTCCTTCGGATATCTAATATCCTGCGCCAGCTCCTCGACC  
 TCGATGGCGCTGTCTGTGGGTCCGCCGGTTATCATACCATTCTGCTCTTTGGCG  
 GCTTCTTCTGAACTCGGGCTCGGTGCCAGTATACCTCAAATGGTTGTGCTACCT

CTCATGGTTCGGTTACGCCAACGAGGGTCTGCTGATTAACCAATGGGCGGACGTG  
GAGCCGGGCGAAATTAGCTGCACATCGTCGAACACCACGTGCCCCAGTTCGGGCA  
AGGTCATCCTGGAGACACTTAACTTCTCCGCCGCCGATCTGCCGCTGGACTACGT  
GGGTCTGGCCATTCTCATCGTGAGCTTCCGGGTGCTCGCATATCTGGCTCTAAGA  
CTTCGGGCCCCGACGCAAGGAGTAGCCGACATATATCCGAAATAACTGCTTGTTTT  
TTTTTTTTTACCATTATTACCATCGTGTTTACTGTTTATTGCCCCCTCAAAAAGCT  
AATGTAATTATATTTGTGCCAATAAAAACAAGATATGACCTATAGCCGATGAGA  
CCAG

Construction of the repair template for HDR-CRISPR (used to make allele *Yippee*<sup>41</sup>) used a new set of vectors we designed to simplify assembly of homology arm constructs. Basically, it consists of a marker segment and a vector backbone segment, carried in separate plasmids (Figure S2), which are assembled together with PCR-amplified homology arms to make a final marker-construct for injection.

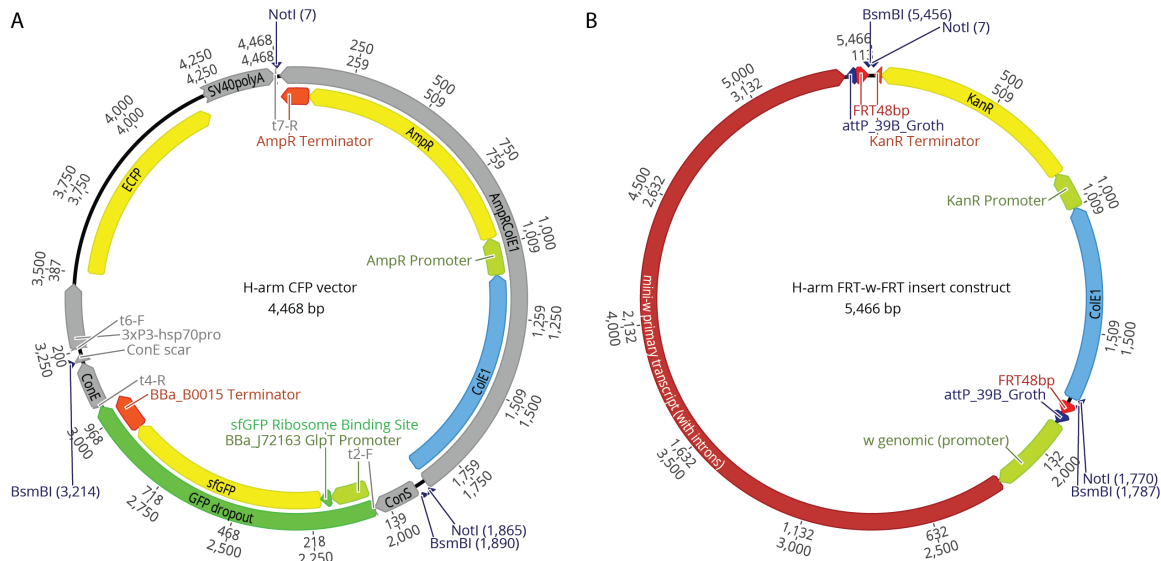

**Figure S2.** HDR-CRISPR vector and insert plasmids. (A) Vector plasmid “H-arm-CFP” and (B) insert plasmid “H-arm FRT-w-FRT” for making HDR-CRISPR homology arm constructs. The marker plasmid carries *mini-w*, flanked by tandem FRT sites for marker excision and inverted attP sites for recombinase-mediated cassette exchange. The vector backbone is a standard MoClo vector but with a 3xP3-CFP marker to identify unexpected insertion events (an unpublished design idea credited to Kate O’Connor-Giles’ lab). Vector and insert bands are purified and Gibson assembled with homology arms. The arms are produced by PCR from primers carrying overhangs that match the MoClo Yeast Toolkit assembly connectors. A revised vector pair that allows assembly by MoClo/Golden Gate as well as Gibson assembly is also available from the authors.

The vector plasmid “H-arm-CFP” has structure (t1)Con1-(t234r)GFPdropout-(t5)Con2-(t67)dmo-3xP3\_CFP-(t8)AmpRCole1 (Figure S2). The marker plasmid “H-arm FRT-w-FRT” has structure (t1)FRT48-attP39B-(t234)dmo-mini-w-(t5)attP39Brc-FRT48-(t678)KanRCole1. The minimal attP39B site sequence is from

Groth et al. (2000). The minimal FRT48 site sequence is from Turan and Bode

(2011). The 'dmo' parts are newly engineered and we report their sequences here.

- (t1) FRT48 attP39B was amplified from annealed oligos and has sequence  
GCATGGTCTCACCTCGTCTCACTGAGAAGTTCCTATTCCGAAGTTCCTATTCTC  
TAGAAAGTATAGGAACTTCCCCCAACTGGGGTAACCTTTGAGTTCTCTCAGTTGG  
GGGAACGTGAGACCGCAT
- (t5) attP39Brc FRT48 was amplified from annealed oligos and has sequence  
GCATGGTCTCAGCTGCCCCCAACTGAGAGAAGTCAAAGGTTACCCAGTTGGGGG  
AAGTTCCTATTCCGAAGTTCCTATTCTCTAGAAAGTATAGGAACTTCAGCATGAG  
ACGTACATGAGACCGCAT
- (t67) dmo-3xP3\_CFP was assembled from PCR fragments of 3xP3-CFP that  
we amplified from gDNA of BDSC strain 32070 to remove BsaI and Esp3I  
sites. The version used in this paper retains a NotI site in the SV40  
terminator. The cloned insert (Level 0, CamR) has sequence  
AGTCGGTCTCATACAGGATCTAATTCAATTAGAGACTAATTCAATTAGAGCTAA  
TTCAATTAGGATCCAAGCTTATCGATTTCTGAACCCTCGACCGCCGGAGTATAAAT  
AGAGGCGCTTCGTCTACGGAGCGACAATTCAATTCAAACAAGCAAAGTGAACAC  
GTCGCTAAGCGAAAGCTAAGCTAATATACAAGCGCAGCTGAACAAGCTAAACAA  
TCGGGGTACCGCTAGAGTCGACGGTACGATCCACCGGTCGCCACCATGGTGAGCA  
AGGGCGAGGAGCTGTTACCGGGGTGGTGCCCATCCTGGTCGAGCTGGACGGCGA  
CGTAAACGGCCACAAGTTCAGCGTGTCCGGCGAGGGCGAGGGCGATGCCACCTAC  
GGCAAGCTGACCTGAAGTTCATCTGCACCACCGGCAAGCTGCCCCGTGCCCTGGC  
CCACCCTCGTGACCACCTGACCTGGGGCGTGCAAGTGCTTCAGCCGCTACCCCGAC  
CATGAAGCAGCAGACTTCTTCAAGTCCGCCATGCCCCGAAGGCTACGTCCAGG  
AGCGCACCATCTTCTTCAAGGACGACGGCAACTACAAGACCCGCGCCGAGGTGAA  
GTTTCGAGGGCGACACCCTGGTGAACCGCATCGAGCTGAAGGGCATCGACTTCAAG  
GAGGACGGCAACATCCTGGGGCACAAGCTGGAGTACAACCTACATCAGCCACAACG  
TCTATATCACCGCCGACAAGCAGAAGAAGCGCATCAAGGCCAACTTCAAGATCCG  
CCACAACATCGAGGACGGCAGCGTGCAGCTCGCCGACCACTACCAGCAGAACACC  
CCCATCGGCGACGGCCCCGTGCTGCTGCCCCGACAACCACTACCTGAGCACCAGTC  
CGCCCTGAGCAAAGACCCCAACGAGAAGCGCGATCACATGGTCCTGCTGGAGTTC  
GTGACCGCCGCGGGGATCACTCTCGGCATGGACGAGCTGTACAAGTAAAGCGGCC  
GCGACTCTAGATCATAATCAGCCATACCACATTTGTAGAGGTTTTACTTGCTTTA  
AAAAACCTCCCACACCTCCCCCTGAACCTGAAACATAAAATGAATGCAATTGTTG  
TTGTTAACTTGTTTATTGCAGCTTATAATGGTTACAAATAAAGCAATAGCATCA  
CAAATTTCAAAATAAAGCATTTTTTTTCACTGCATTCTAGTTGTGGTTTGTCCAA  
ACTCATCAATGTATCTTACCGATGAGACCAG
- (t234) dmo-mini-w has sequence that matches the t7 dmo-mini-w described  
above but with t2 (AACG) and t4 (GCTG) BsaI overhangs.



For Gibson assembly of the *Yippee* homology arm construct, vector and insert were prepared by 6h enzyme digestion, then the appropriate bands purified by gel extraction. Homology arms were PCR amplified from genomic DNA of the *vasa*-Cas9 expressing strain using primers carrying tails that matched the vector or insert, and then column or gel purified. Vector, insert and homology arms were then assembled using NEBuilder HiFi assembly mix (NEB), cloned, and verified by Sanger sequencing, resulting in the vector shown in Figure S3. The *Yippee* homology arm primers are: yip-Lharm-F CCCTGAATTCGCATCTAGAGTCCAGGCATCCGTTTGTCC, yip-Lharm-R GGAAGTTCGGAATAGGAACTTCGGCTGGCGAATAGAGTATTGCAA, yip-Rharm-F TTCTCTAGAAAGTATAGGAACTTCGTATTGAGTAGATGGCCACAGG, yip-Rharm-R GGTTCGTAACATCTCTGTAACCAAAATGGCTAAGACACCGGAAAAC.

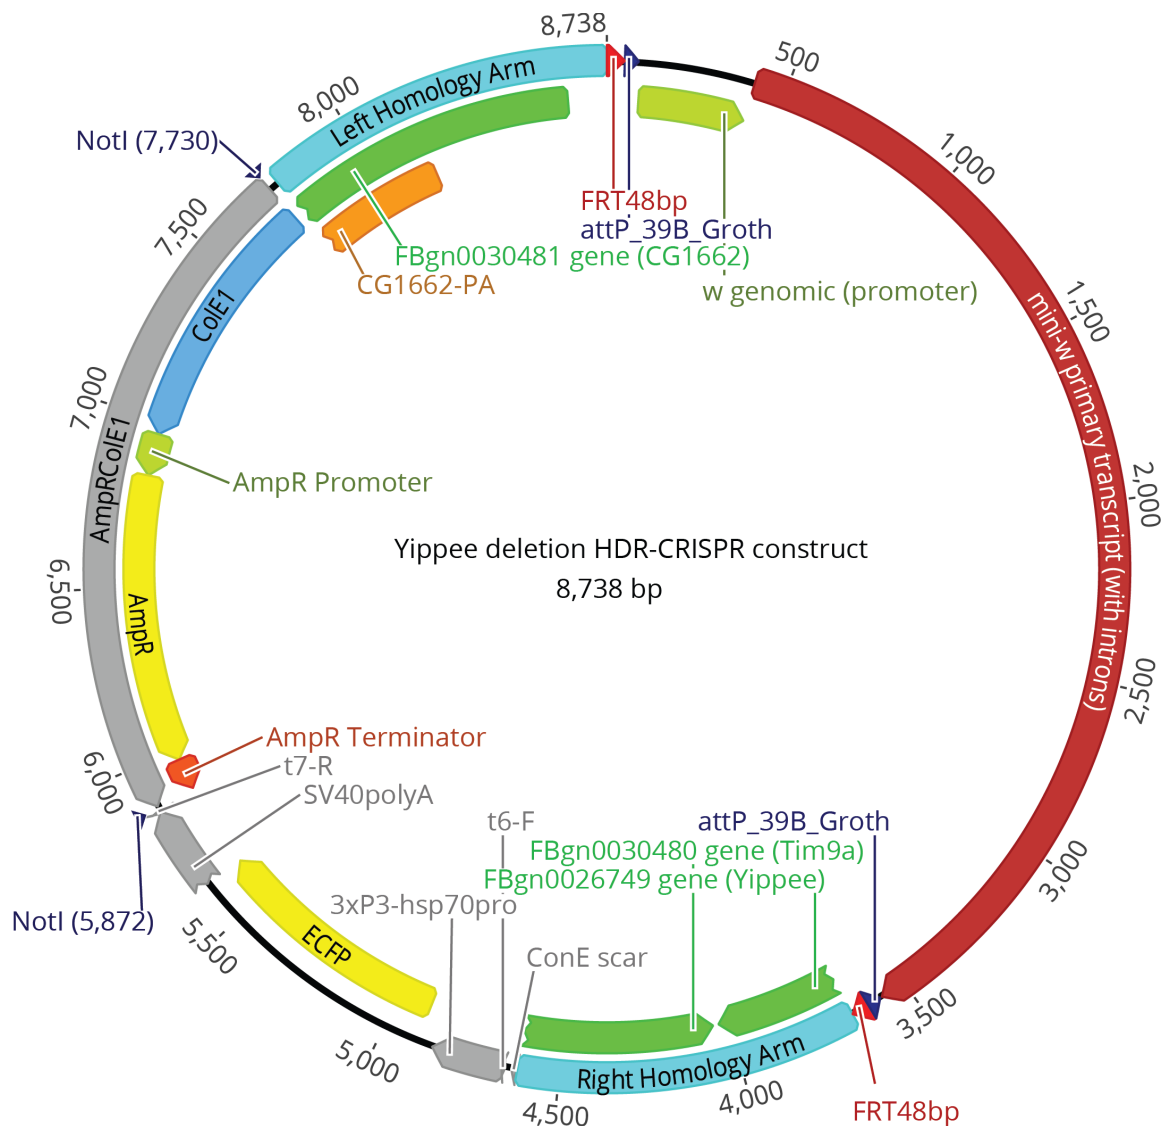

**Figure S3.** Homology-arm marker construct used to create the *Yippee*<sup>Δ1</sup> allele.

Guide RNAs were chosen from high-scoring predictions of the DRSC Find CRISPRs website ([www.flyrnai.org/crispr](http://www.flyrnai.org/crispr)) and incorporated into pU6-3-chiRNA (Gratz et al. 2014) by the KLD site-directed-mutagenesis procedure ([flycrispr.org/protocols/grna](http://flycrispr.org/protocols/grna)). The target sequence of the 5' guide, located in the *Yippee* core promoter region, is gATACAAGTGGACTTAGGGC (with g substituted at the 20<sup>th</sup> position). The target sequence of the 3' guide, located in the *Yippee* 3'-UTR,

is GGCCATCTACTCAATACTTA. The CRISPaint0 “frame 0 selector” guide, used to cut the donor template, is gccagtacccaaaaagcggg (adapted from Schmid-Burgk et al. 2016; Bosch et al. 2020). After Sanger sequence verification, guide plasmids were prepared for injection using a miniprep kit (Promega), then the eluate was further purified using binding buffer from a PCR cleanup kit and a second miniprep column (Bosch et al. 2020). Marker constructs were purified using the Nucleobond Xtra Midi Plus EF kit (Macherey-Nagel)

Injection mix consisted of guides and repair templates at final concentrations of 50 ng/μl guide and 500 ng/μl repair template. Injections were performed by BestGene, Inc. (Chino Hills, CA) into the vasa-Cas9 strain BL 56552. Red-eyed progeny were initially crossed to *y w* and then the *w*<sup>+</sup> marker was balanced over FM7.

#### IV. Determination of structure of new mutant alleles

PCR and Sanger sequencing of junctions between genomic DNA and insert was used to determine the structure of the modification in each fly line. The inferred structure of each insertion is shown in Figure S4.

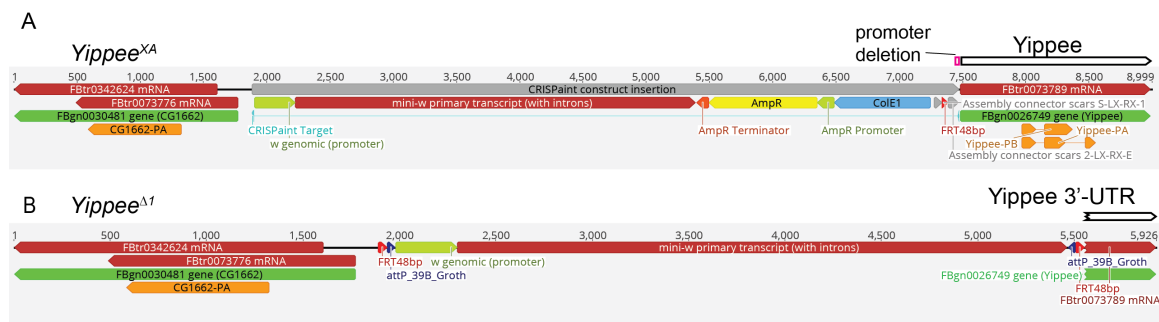

**Figure S4.** Inferred structure of new mutant alleles. Structure is based on known structure of constructs (Figure S1, S3) as well as PCR and sequences of insertion junctions. Image constructed using Geneious Prime.

For the CRISPaint approach (strain *Yippee<sup>Chi-A</sup>*), a series of PCRs were conducted to verify the insert location and structure. First, PCRs were conducted using OneTaq polymerase (New England Biolabs) and all combinations of 5'-flanking primers (*Yippee*-seq-F3 CTGGAGTTAGCTTAGAAAGTTATACAC and *Yippee*-5'-Region-R1 GTCAGGTGTCCGGTGTGAGGG), 3'-flanking primers (*Yippee*-seq-F5 CACAAGACATCTTACTAATGCTCCAA and *Yippee*-seq-R2 CTCCGTGGCGGATGTGC) and construct-specific primers (S3a-R3 AGTTCAATGATATCCAGTGCAGTA, *chk\_AmpRCole1*-F1 GCTCACATGTTCTTTCTGCGTTATCCCC). Bands in an agarose gel were observed for primer combinations S3a-R3/*Yippee*-seq-F3 and *chk\_AmpRCole1*-F1/*Yippee*-5'-Region-R1, suggesting that the CRISPaint mini-w

construct had inserted only into the 5' site, and that the *mini-w* gene inserted in the same orientation as *Yippee*.

The 3'-UTR site from strain *Yippee*<sup>Chi-A</sup> was reamplified using Q5 polymerase then sequenced using primers yippee-seq-F4 CCTGCGTTTCGCAAGTGGAG and yippee-seq-R2 CTCCGTGGCGGATGTGC, yielding a band of the wildtype size, with consensus sequence

TCTGCGACTGCCACCACACAAGACATCTTACTAATGCTCCAATTTATCTCTTAGATACAA  
GGAGGGTCGCGTTATCCTGGAGTACGCCCTGATCACAGAGGCAGAGGGCTTTCGTCGGA  
GGCCGCCACCACGAGTCATTGAGCCGATTGAATATACAGCCGAAAACGGGAACCACGCA  
TTGGCGAACCTTGTGTAGCCCT**TATAGGGTAGAGTAGATGG** . This indicates that at  
this guide RNA target site, the sequence AAGTATT was mutated to TATAGGGTA by  
repair of the CRISPR cut.

The 5'-UTR site from strain *Yippee*<sup>Chi-A</sup> was reamplified using Q5 polymerase and a modified set of primers. The left end was amplified using primers yippee-seq-F3 CTGGAGTTAGCTTAGAAAGTTATACAC and uwseq-R6

GAAAGAACCTGGTACTTCAAATACCCTTGG , resulting in the following consensus  
sequence (Underline denotes sequence from the inserted *mini-w* construct)

ATACACATTGTTTTTCGAATTTTTTTGCCTGATTTGACTTTTGAAAGGCAATCCGGACAC  
ACGCAACAGCAACAACAACAATCACGTGTAGGGAACAGCTGTTACGACGAGGGCTA  
GTTGGCTTAAGTTATCGATAGTTTAAACAATCGTAGCCAATTGAATTTTAAAAAATTTAA  
ATAATAAGCCCTTGATATGTTAAAGACAAAAAAGATATCAAAACAACCTTAAATTTGTAA  
AAAAAAGTGTAATTTTCAACAAAGAATTTTAAAAGAGACCGATAATGCCTTGCTTGTC  
TGGTTGAAAATATTCGTTTGATATATAAACAATAAAATAAAACAGAAACGTAGCACAAA

TGACCAATACTTAATAAATTCAAATATTTTGCAATACTCTATCTCTTTGGGTACTGGCCC  
GAGTCTAGTATGTATGTAAGTTAATAAAACCCTTTTTTGCGGAAAGTAGATAAAAAAAA  
CATTTTTTTTTTTTACTGCACTGGATATCATTGAACTTATCTGATCA . The right end of  
 was amplified using primers chk\_ampRColE1-F1  
 GCTCACATGTTCTTTCCTGCGTTATCCCC and yippee-5'-region-R1  
 GTCAGGTGTCCGGTGTCAAGGG , resulting in sequence  
CCCTGAATTCGCATCTAGACTGAACTGGCCGATAATTGCAGACGAACGGCTGCCAAACCA  
GATGTCAACACAGCTACAACGGAAGTTCCTATTCCGAAGTTCCTATTCTCTAGAAAAGTAT  
AGGAACTTCGCTGGATGCACACACTGGCTTAAGATGACAACGGCTGAGCAGTTACAGAG  
ATGTTACGAACCACTAGTGCACTGCAGTACACCCCCTTTTAGCCTTGCATCGATAGCGC  
 AGAATGCAGTGAC. Thus, TCGCCAGCCCTAAGTCCACTTGTATTCTGA was deleted from  
 the *Yippee* promoter region at the 5' guide RNA target site prior to insertion of the  
*mini-w* construct in strain *Yippee<sup>Chi-A</sup>*.

For the HDR-CRISPR deletions, six independent insertions (including the  
*Yippee<sup>Δ1</sup>* line) were checked by PCR using primers in the *mini-w* marker and in  
 flanking genomic sequence not present in the homology arms. All six insertions gave  
 bands of the expected size, suggesting that *Yippee* was correctly deleted and *mini-w*  
 construct inserted in its place, as planned. The left side assay used primers uwseq-  
 R6 and Yippee-Region-F1 GCATCATGCGGCCCAACAAACAAGATTAGG, and the  
 right side assay used primers uwseq-F6 ACCATCGTGTTTACTGTTTATTGCCC and  
 Yippee-Region-R1 GAGCACACCCACAAAGCAGGAGC. Sequences were obtained from  
 the *Yippee<sup>Δ1</sup>* PCR products around the junctions of the guide RNA sites; these  
 matched the expected structure with no additional mutations.

## V. Photography equipment

Our rig was a variation on the insect photography systems described by Buffington *et al.* (2005) and Kawada and Buffington (2016). Emerged adult flies were visualized through a Zeiss Primo Star compound microscope with standard 10X eyepieces and a Zeiss Plan-ACHROMAT 4X objective lens. (Pharate adults were visualized under a different microscope as described in the next section.) For imaging, a NEX-3N camera body (Sony) was attached to one of the microscope eyepieces with a T-Ring for Sony E Mount and 2-Inch Universal T Adapter (CNC Parts Supply, Inc.). Lighting was provided by two commercial desk lamps pointing at the specimen from either side of the microscope stage, each fitted with a 20W, 120V CFL bulb with 6500K color temperature (General Electric #FLE20HT3/2/D). Although the “light dome” templates provided by Kawada and Buffington (2016) were helpful conceptually, we could not adapt them to accommodate the relative dimensions of our flies and equipment, and so to block direct glare and otherwise diffuse the lighting, a round hole was cut in the middle of a white plastic to-go coffee cup lid, and this makeshift light dome was placed in a skirt-like orientation around the shaft of the objective lens.

## VI. Preparation of flies for photography

1-5-day-old adult flies were CO<sub>2</sub>-anesthetized, transferred to empty fly vials, and stored in a -20°C freezer. (Age was controlled because *Drosophila* cuticle rapidly darkens immediately after emergence, then slowly darkens thereafter.) In frozen storage, fly tissue dehydrates and darkens very gradually, and this process accelerates after flies are withdrawn from the freezer, so each specimen was photographed within a month after freezing and within about 2 hours after removal from the freezer. For each experiment, experimental and control crosses were set up in parallel. Progeny were collected and frozen concurrently, then photographed within 1-2 days of each other—*i.e.*, before being photographed, experimental groups and controls had been reared under the same incubation conditions, collected at the same adult age range, then stored in the freezer for about the same length of time.

A photography “platform” was prepared by flattening a small lump of white modelling clay onto a microscope slide, then affixing a square of white paper on top of the clay. Flies were placed on the paper platform; body positioning was fine-tuned by gently pressing the platform and underlying clay around each fly.

*Yippee*<sup>*Δ1*</sup> mutants died as late pharate adults, failing to emerge from their pupal cases. Rather than freezing these specimens, they were prepared as follows: *Yippee*<sup>*Δ1*</sup>/Y and *s*<sup>+</sup>/Y stage P13-14 pharate adults were dissected out of their pupal cases in 70% ethanol and left in the liquid. Photographs were taken with the same camera and lighting described in the previous section, but using a Zeiss Stemi 305 dissecting microscope.



## VII. Photography for assembly of figure images

Figure images were photographed with the rig described in **V. Photography equipment**. Camera settings were ISO 800, 0.5 sec exposure, fine JPEG format, and a 10 second delay self-timer to avoid camera shake. The camera lens had been removed to attach the camera body to the microscope eyepiece; this caused each image to have a shallow depth of field. To obtain figure images with deeper apparent focus, we employed the following focal stacking strategy:

- 1) The very top of the specimen was placed in focus and photographed.
- 2) The fine focus knob was adjusted downwards roughly 1.6-2 units, raising the stage about 4-5  $\mu\text{m}$ .  
Another picture was taken.
- 3) Step 2 was repeated until all features of interest (dorsal thorax, wings, bristles) had been captured in focus (usually 40-70 exposures).
- 4) Images were imported into Adobe Photoshop CC 2015. Groups of no more than 10 consecutive images were focal stacked using the Auto-align and Auto-blend tools. Each focal stack overlapped by 4 primary images (*i.e.*, we stacked images 1-10, then separately 7-16, 13-22, *etc.*)—we found that this level of overlap helped blend the stacks seamlessly at Step 5.
- 5) A series of no more than 10 contiguous stacks were selected that collectively showed all features of interest in focus. In a second round of focal stacking, these stacks were Auto-aligned and Auto-blended into a deeper “meta-stack”. This meta-stack was flattened into one image and saved.

Our camera settings had underexposed the images (explained in the next section), so once a set of figure panels had been assembled into a Photoshop file, exposure of the whole file was adjusted +1. One sharpen filter was added to help clarify bristle and wing edges.

## VIII. Photography for quantifying body luminance

The following procedure was based on standard photography protocols used in comparative studies of animal coloration (Stevens *et al.* 2007; Bergman and Beehner 2008; De Souza *et al.* 2017; De Souza *et al.* 2020). Using the photography rig described in **V. Photography equipment**, a single photo was taken of each fly with most of its dorsal thorax in focus. Unlike figure images, which were acquired as fine JPEGs, these images were taken in RAW format to avoid loss of pixel information by file compression (Stevens *et al.*, 2007). Otherwise, camera settings were identical to those described in the previous section—ISO 800/0.5 sec was an intentional underexposure to prevent loss of gray value data by pixel saturation. For use in white balancing (described in next paragraph), an 18% gray card from the White Balance Card Set (Vello) was imaged with the same photography rig, lighting, and camera settings.

For most experiments, 15 flies/genotype were photographed, but for the misexpression and rescue experiments (Figure 4), 60 flies/genotype were photographed to help discern the relatively subtle differences between  $s^+$  and  $s^1$  when flies had been reared at 25°C vs. room temperature. Images were imported into Adobe Photoshop CC 2015. The gray card image was used to establish a white balance levels preset; each fly image was color-corrected with this preset, converted to grayscale, then exported as a TIFF.

## IX. Collection and analysis of body luminance data

The TIFF images described at the end of the previous section were opened in ImageJ 1.53i (Schneider *et al.* 2012). Using the Multi-point tool, 20 pixels were randomly selected across a specific area of the scutum of each fly (Figure S5), then the RGB gray values for these pixels were quantified using the Measure tool. [The RGB gray value scale ranges from 0 (black) to 255 (white).] Raw data were transferred to an XLSX file (Supplementary Data). Data were analyzed using JMP and R as described in the Materials and Methods section of the main text.

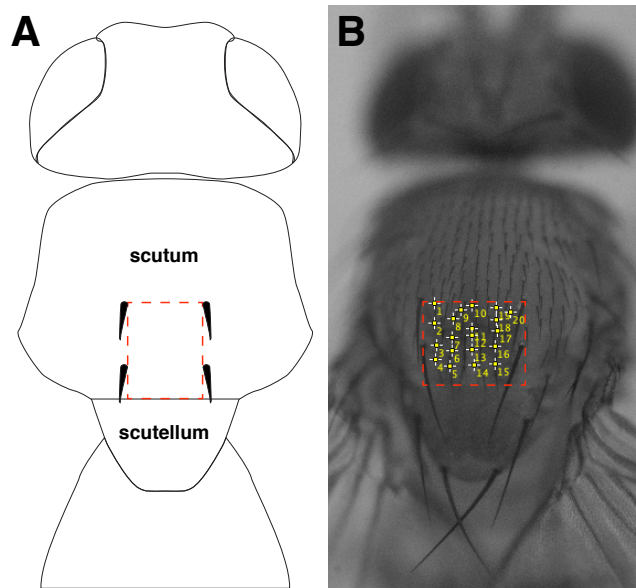

**Figure S5.** Area of the dorsal thorax where cuticle gray values were measured. **(A)** Schematic of an adult fly, dorsal view. Red rectangle indicates area on the scutum between the dorso-central macrochaetes, extending posteriorly to the scutum-scutellum border. We focused on this portion of the scutum because its pigmentation appeared to be a particularly sensitive indicator of *sable/Yippee* function. (Note that this is the region where a “trident” can appear in dark-bodied mutants; example in Figure 1 of manuscript.) **(B)** Example of a fly image in ImageJ, post-analysis. 20 pixels were selected throughout the scutal area of interest (yellow “+” marks), and their RGB gray values were recorded and transferred to an XLSX file (Supplementary Data).

## X. References

- Agrawal, N., J. Pallos, N. Slepko, B. L. Apostol, L. Bodai *et al.*, 2005 Identification of combinatorial drug regimens for treatment of Huntington's disease using *Drosophila*. *Proc Natl Acad Sci U S A* 102: 3777-3781.  
<https://doi.org/10.1073/pnas.0500055102>
- Altschul, S. F., W. Gish, W. Miller, E. W. Myers and D. J. Lipman, 1990 Basic local alignment search tool. *J Mol Biol* 215: 403-410.  
[https://doi.org/10.1016/S0022-2836\(05\)80360-2](https://doi.org/10.1016/S0022-2836(05)80360-2)
- Azpiaz, N., and G. Morata, 2000 Function and regulation of homothorax in the wing imaginal disc of *Drosophila*. *Development* 127: 2685-2693.  
<https://doi.org/10.1242/dev.127.12.2685>
- Bellen, H. J., R. W. Levis, G. Liao, Y. He, J. W. Carlson *et al.*, 2004 The BDGP gene disruption project: single transposon insertions associated with 40% of *Drosophila* genes. *Genetics* 167: 761-781.  
<https://doi.org/10.1534/genetics.104.026427>
- Bellen, H. J., R. W. Levis, Y. He, J. W. Carlson, M. Evans-Holm *et al.*, 2011 The *Drosophila* gene disruption project: progress using transposons with distinctive site specificities. *Genetics* 188: 731-743.  
<https://doi.org/10.1534/genetics.111.126995>
- Bergman, T. J. and J. C. Beehner, 2008 A simple method for measuring colour in wild animals: validation and use on chest patch colour in geladas (*Theropithecus gelada*). *Biological Journal of the Linnean Society* 94: 231-240. <https://doi.org/10.1111/j.1095-8312.2008.00981.x>
- Bischof, J., M. Bjorklund, E. Furger, C. Schertel, J. Taipale, and K. Basler, 2013 A versatile platform for creating a comprehensive UAS-ORFeome library in *Drosophila*. *Development* 140: 2434-2442.  
<https://doi.org/10.1242/dev.088757>
- Bosch, J.A., R. Colbeth, J. Zirin, and N. Perrimon, 2020 Gene knock-ins in *Drosophila* using homology-independent insertion of universal donor plasmids. *Genetics* 214: 75-89. <https://doi.org/10.1534/genetics.119.302819>
- Buffington, M. L., R. A. Burks, and L. McNeil, 2005 Advanced Techniques for Imaging Parasitic Hymenoptera (Insecta). *American Entomologist* 51: 50-56. <https://doi.org/10.1093/ae/51.1.50>
- Calleja, M., H. Herranz, C. Estella, J. Casal, P. Lawrence *et al.*, 2000 Generation of medial and lateral dorsal body domains by the *pannier* gene of *Drosophila*. *Development* 127: 3971-3980. <https://doi.org/10.1242/dev.127.18.3971>

- Chetverina, D., E. Savitskaya, O. Maksimenko, L. Melnikova, O. Zaytseva *et al.*, 2008 Red flag on the white reporter: a versatile insulator abuts the white gene in *Drosophila* and is omnipresent in mini-white constructs. *Nucleic Acids Res* 36: 929-937. <https://dx.doi.org/10.1093%2Fnar%2Fgkm992>
- Dean D. M., D. L. Deitcher, D. W. Loehlin, and L. M. Banta, 2020. Mapping a mutation to its gene: The “fly lab” as a modern research experience. *CourseSource*. <https://doi.org/10.24918/cs.2020.51>
- De Souza, A. R., S. Turillazzi, J. Lino-Neto and G. Santini, 2017 Colder environments may select for darker paper wasps. *Biological Journal of the Linnean Society* 120: 700-704. <https://doi.org/10.1111/bij.12910>
- De Souza, A. R., A. Z. Mayorquin and C. E. Sarmiento, 2020 Paper wasps are darker at high elevation. *Journal of Thermal Biology* 89: 102535. <https://doi.org/10.1016/j.jtherbio.2020.102535>
- Dietzl, G., D. Chen, F. Schnorrer, K. C. Su, Y. Barinova *et al.*, 2007 A genome-wide transgenic RNAi library for conditional gene inactivation in *Drosophila*. *Nature*, 448: 151–156. <https://doi.org/10.1038/nature05954>
- Gratz, S. J., F. P. Ukken, C. D. Rubinstein, G. Thiede, L. K. Donohue, A. M. Cummings, and K. M. O'Connor-Giles, 2014 Highly specific and efficient CRISPR/Cas9-catalyzed homology-directed repair in *Drosophila*. *Genetics* 196: 961-71. <https://doi.org/10.1534/genetics.113.160713>
- Henderson, K. D., and D. J. Andrew, 2000 Regulation and function of *Scr*, *exd*, and *hth* in the *Drosophila* salivary gland. *Dev Biol* 217: 362-374. <https://doi.org/10.1006/dbio.1999.9560>
- Heitzler, P., M. Haenlin, P. Romain, M. Calleja and P. Simpson, 1996 A genetic analysis of *pannier*, a gene necessary for viability of dorsal tissues and bristle positioning in *Drosophila*. *Genetics* 143: 1271-1286. PMID: 8807299; PMCID: PMC1207396.
- Henderson, K. D., and D. J. Andrew, 2000 Regulation and function of *Scr*, *exd*, and *hth* in the *Drosophila* salivary gland. *Dev Biol* 217: 362-374. <https://doi.org/10.1006/dbio.1999.9560>
- Hoskins, R. A., A. C. Phan, M. Naeemuddin, F. A. Mapa, D. A. Ruddy *et al.*, 2001 Single nucleotide polymorphism markers for genetic mapping in *Drosophila melanogaster*. *Genome Res* 11: 1100-1113. <https://doi.org/10.1101/gr.gr-1780r>

- Ito, K., W. Awano, K. Suzuki, Y. Hiromi and D. Yamamoto, 1997 The *Drosophila* mushroom body is a quadruple structure of clonal units each of which contains a virtually identical set of neurones and glial cells. *Development* 124: 761-771. <https://doi.org/10.1242/dev.124.4.761>
- Kawada, R., and M. L. Buffington, 2016 A scalable and modular dome illumination system for scientific microphotography on a budget. *PLoS One* 11: e0153426. <https://doi.org/10.1371/journal.pone.0153426>
- Kiehart, D. P., C. G. Galbraith, K. A. Edwards, W. L. Rickoll and R. A. Montague, 2000 Multiple forces contribute to cell sheet morphogenesis for dorsal closure in *Drosophila*. *J Cell Biol* 149: 471-490. <https://doi.org/10.1083/jcb.149.2.471>
- Lee, G., and J. H. Park, 2004 Hemolymph sugar homeostasis and starvation-induced hyperactivity affected by genetic manipulations of the adipokinetic hormone-encoding gene in *Drosophila melanogaster*. *Genetics* 167: 311-323. <https://doi.org/10.1534/genetics.167.1.311>
- Lee, M. E., W. C. DeLoache, B. Cervantes, and J. E. Dueber, 2015 A highly characterized yeast toolkit for modular, multipart assembly. *ACS Synthetic Biology* 4: 975-86. <https://doi.org/10.1021/sb500366v>
- Lin, D. M., and C. S. Goodman, 1994 Ectopic and increased expression of *Fasciclin II* alters motoneuron growth cone guidance. *Neuron* 13: 507-523. [https://doi.org/10.1016/0896-6273\(94\)90022-1](https://doi.org/10.1016/0896-6273(94)90022-1)
- Lindsley, D. L., and G. G. Zimm, 1992 *The genome of Drosophila melanogaster*. Academic Press, San Diego.
- Morgan, T. H., and C. B. Bridges, 1916 *Sex-linked inheritance in Drosophila*. Carnegie Institution of Washington, Washington, D.C.
- Parks, A. L., K. R. Cook, M. Belvin, N. A. Dompe, R. Fawcett *et al.*, 2004 Systematic generation of high-resolution deletion coverage of the *Drosophila melanogaster* genome. *Nat Genet* 36: 288-292. <https://doi.org/10.1038/ng1312>
- Rorth, P., 1996 A modular misexpression screen in *Drosophila* detecting tissue-specific phenotypes. *Proc Natl Acad Sci U S A* 93: 12418-12422. <https://doi.org/10.1073/pnas.93.22.12418>
- Schmid-Burgk, J. L., K. Honing, T. S. Ebert and V. Hornung, 2016 CRISPaint allows modular base-specific gene tagging using a ligase-4-dependent mechanism. *Nat Commun* 7: 12338. <https://doi.org/10.1038/ncomms12338>

- Schneider, C. A., W. S. Rasband and K. W. Eliceiri, 2012 NIH Image to ImageJ: 25 years of image analysis. Nat Methods 9: 671-675.  
<https://doi.org/10.1038/nmeth.2089>
- Stevens, M., C. A. Párraga, I. C. Cuthill, J. C. Partridge and T. S. Troscianko, 2007 Using digital photography to study animal coloration. Biological Journal of the Linnean Society 90: 211-237. <https://doi.org/10.1111/j.1095-8312.2007.00725.x>
- Venken, K. J., E. Popodi, S. L. Holtzman, K. L. Schulze, S. Park *et al.*, 2010 A molecularly defined duplication set for the X chromosome of *Drosophila melanogaster*. Genetics 186: 1111-1125.  
<https://doi.org/10.1534/genetics.110.121285>
- Wang, X., W. R. Shaw, H. T. Tsang, E. Reid and C. J. O'Kane, 2007 *Drosophila* spichthyn inhibits BMP signaling and regulates synaptic growth and axonal microtubules. Nat Neurosci 10: 177-185. <https://doi.org/10.1038/nn1841>
- Weber, E., C. Engler, R. Gruetzner, S. Werner, and S. Marillonnet, 2011 A Modular Cloning System for Standardized Assembly of Multigene Constructs. PLoS ONE 6(2): e16765. <https://doi.org/10.1371/journal.pone.0016765>
